# Supplementary material for: The Clinical, Genomic, and Transcriptomic Landscape of BRAF Mutant Cancers
Source: MDPI journal article supplement (doi:10.3390/cancers16020445), 2024-01-19
Supplement: s1 [file s1]

## **Supplemental Methods**

### **Search Strategy:**

Of the 153 834 samples in the AACR GENIE (v12) database, 9515 had identifiable BRAF mutations. 2022 of these samples harbored unclassifiable mutations or variants of unknown significance (VUS), and were excluded from further analyses. Unclassifiable mutations were BRAF mutations with mechanisms of actions that did not follow the kinase activity, RAS-dependency, and dimerization requirements of the BRAF classification system. Variants of uncertain significance were BRAF mutations whose function and association to disease are unknown. 1274 pediatric samples were removed, 1079 samples were excluded due to incomplete information on age and gender, and 20 duplicate samples were removed. Of the 153 834 samples in the AACR GENIE (v12) database, a total of 5120 samples with BRAF Class 1, 2, 3 mutations and BRAF Fusions were included in the study (**Supplemental Figure S1**).

### **Genomic Analysis:**

Genomic alteration data was obtained using the GENIEv12 database. BRAF fusions were excluded from the genomic analysis due to small sample size. Additional inclusion criteria for NSCLC, CRC, and melanoma cancer-type specific analyses required genes to have been tested in at least 50% of the samples evaluated. We excluded samples from Oncoprints for which sequencing data was not available for all queried genes. 1264 samples were used to generate oncoprints across all BRAF mutant cancers, 221 samples in NSCLC, 462 samples in CRC, and 579 samples in melanoma.

### **Transcriptomic Analysis:**

Using the TCGA database, RNA sequencing data was obtained for BRAF mutant melanoma, NSCLC and CRC. Data pre-processing of these samples was performed in MATLAB verifying Spearman correlation, total counts, and IQR values of the samples. Outliers were removed and data was normalized in R using the DESeq2 normalization algorithm. Heatmaps were generated in R using the ComplexHeatmap package with an absolute LogFold  $\geq 2$  (BRAF Class 1 vs non-V600 BRAF), baseMean  $\geq 50$ , and padj  $\leq 0.01$  (**Supplemental Tables S19-S21**). The TCGA Melanoma dataset included 167 BRAF Class 1, 11 Class 2, 14 Class 3, and 3 Fusions. The NSCLC

RNAseq data included 9 BRAF Class 1, 9 Class 2, and 14 Class 3. The CRC RNAseq data included 45 BRAF Class 1, 2 Class 2, 5 Class 3, and 1 Fusion. Fusion samples were excluded from the GSEA analyses. The GSEA analysis was performed using the MSigDB Hallmark gene sets, 1000 permutations by phenotype, and using the Ratio of classes metric.

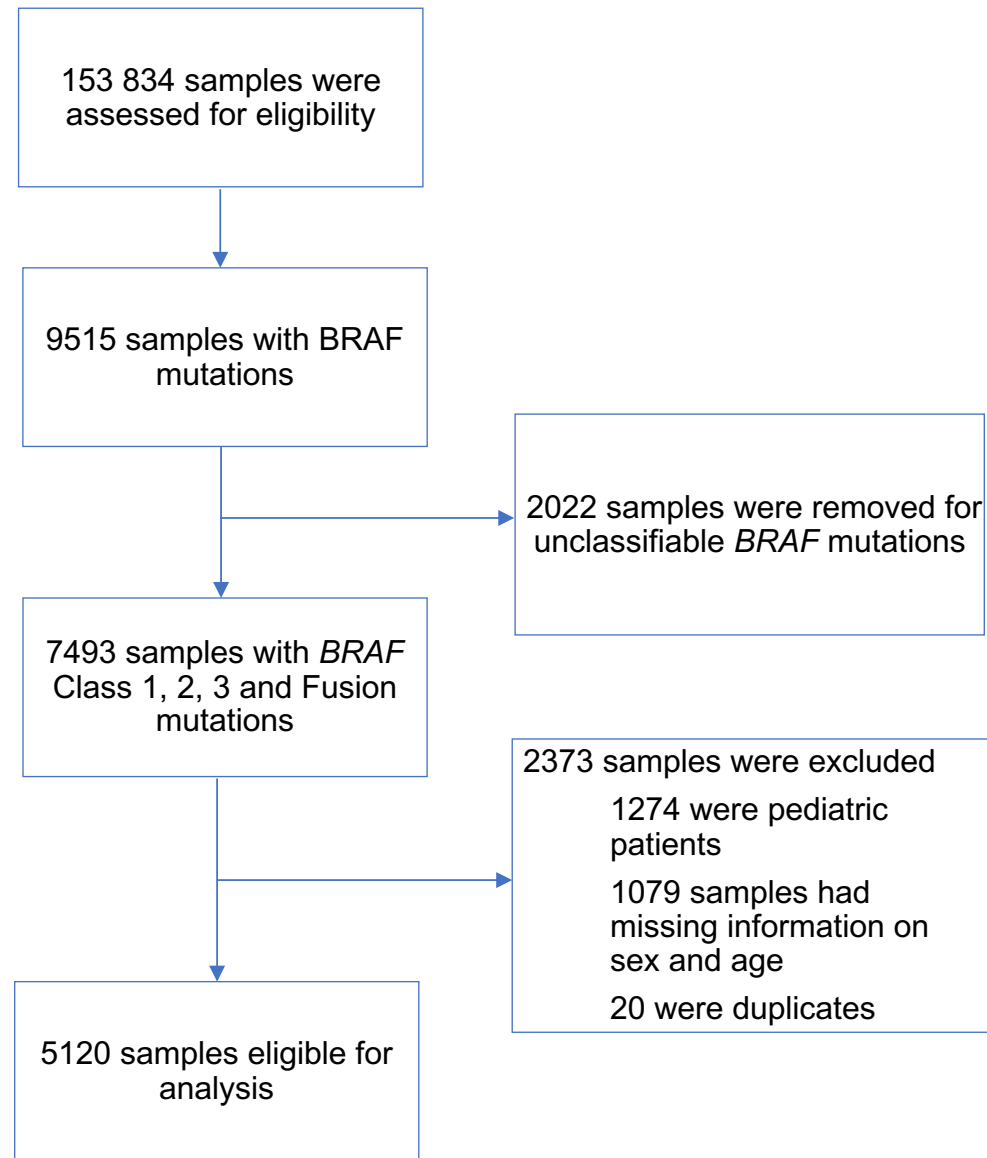

Figure S1

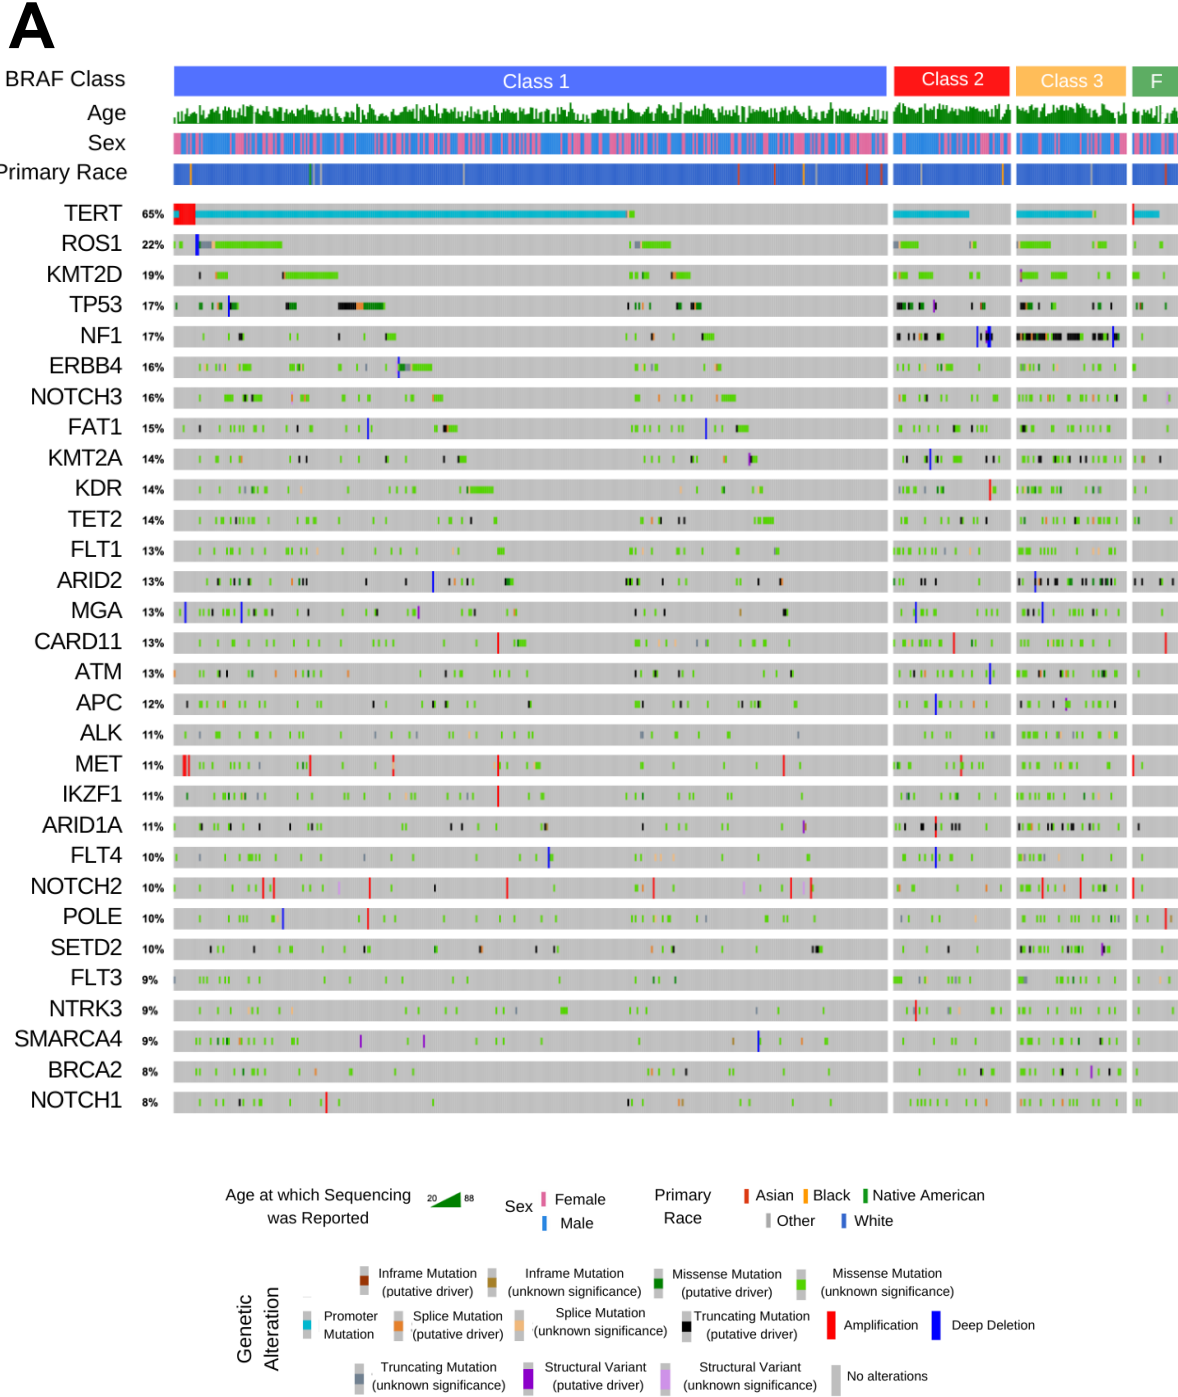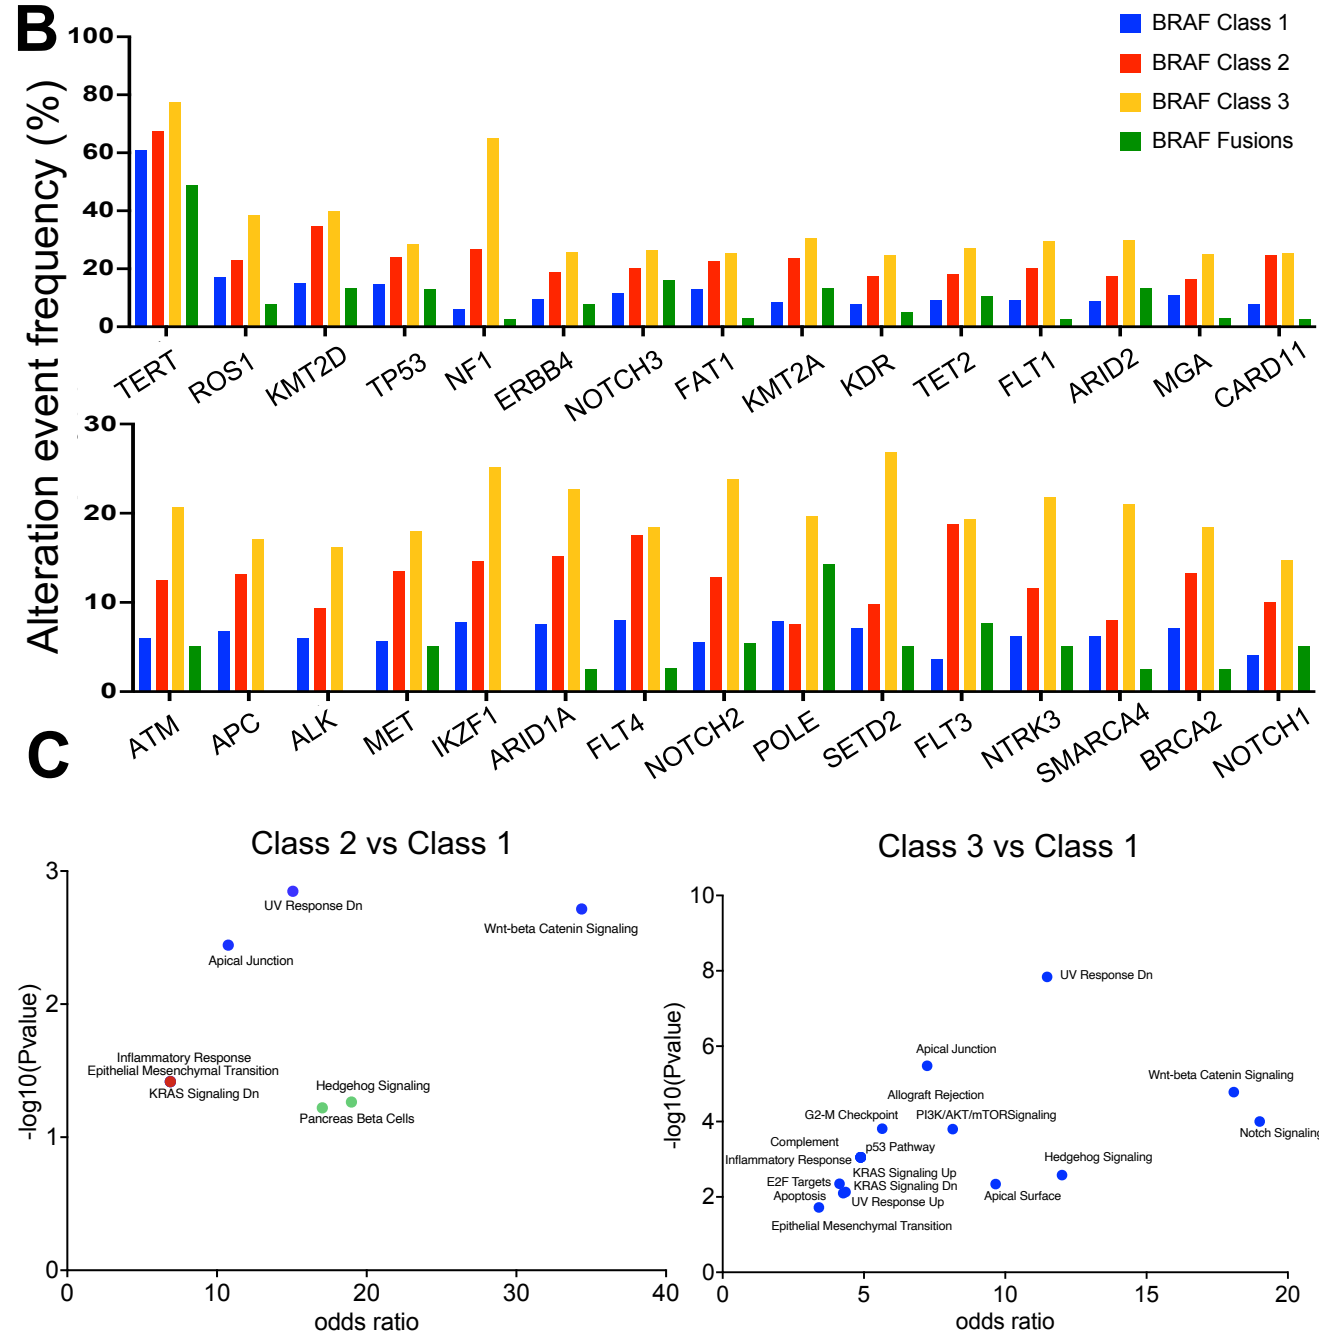

Figure S2

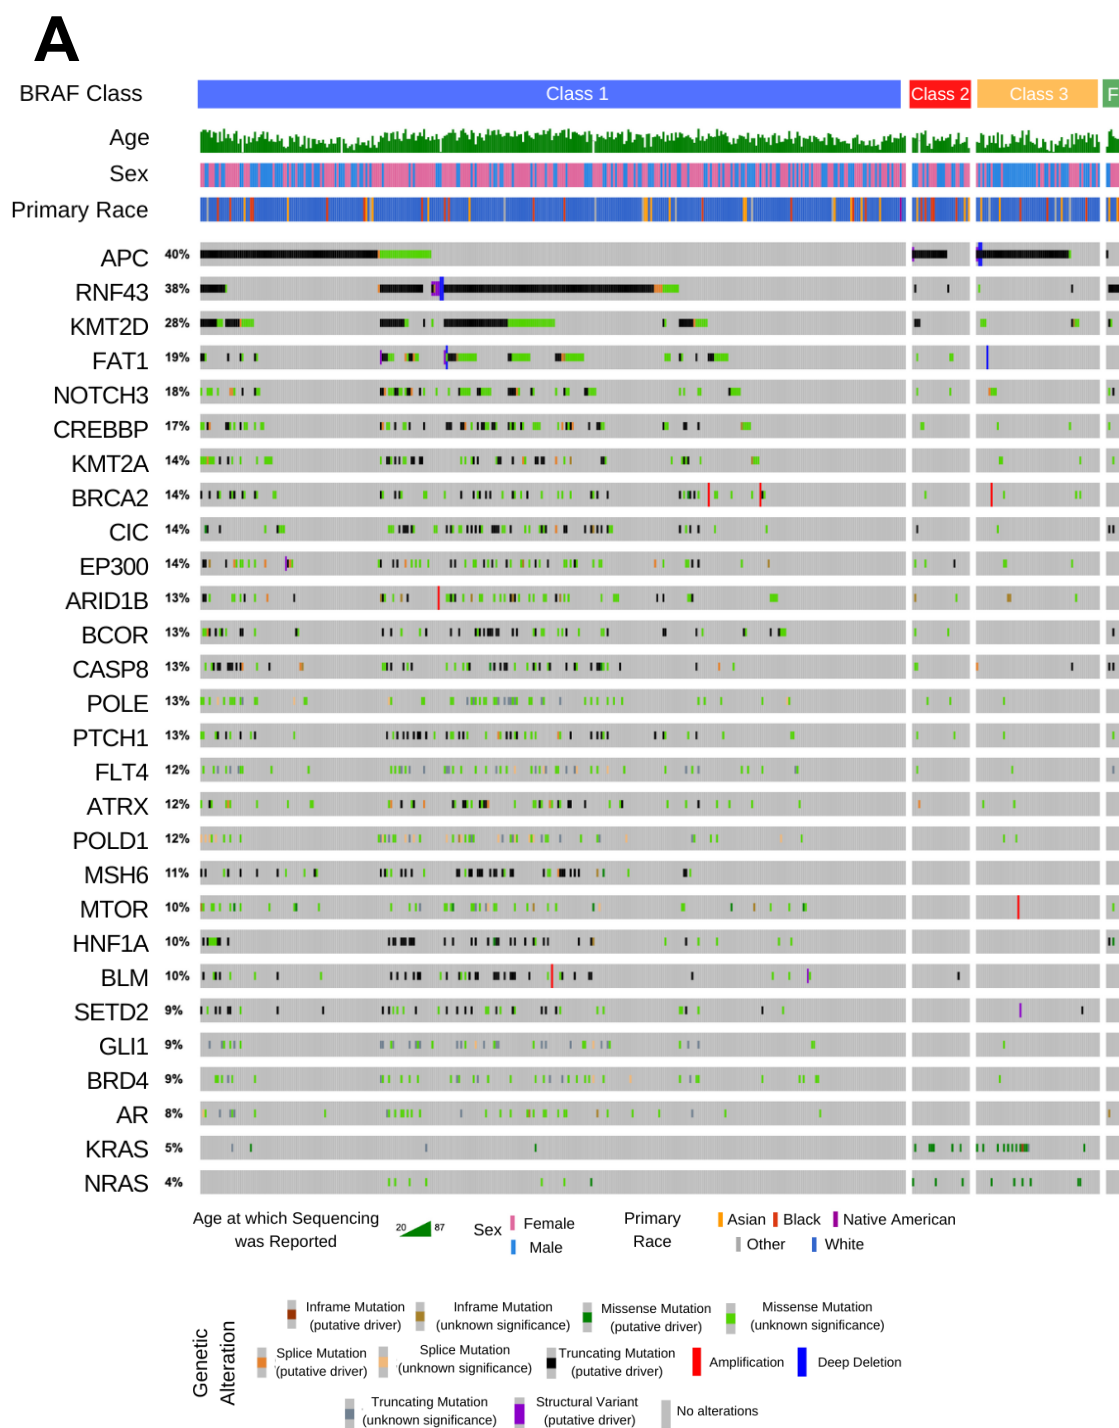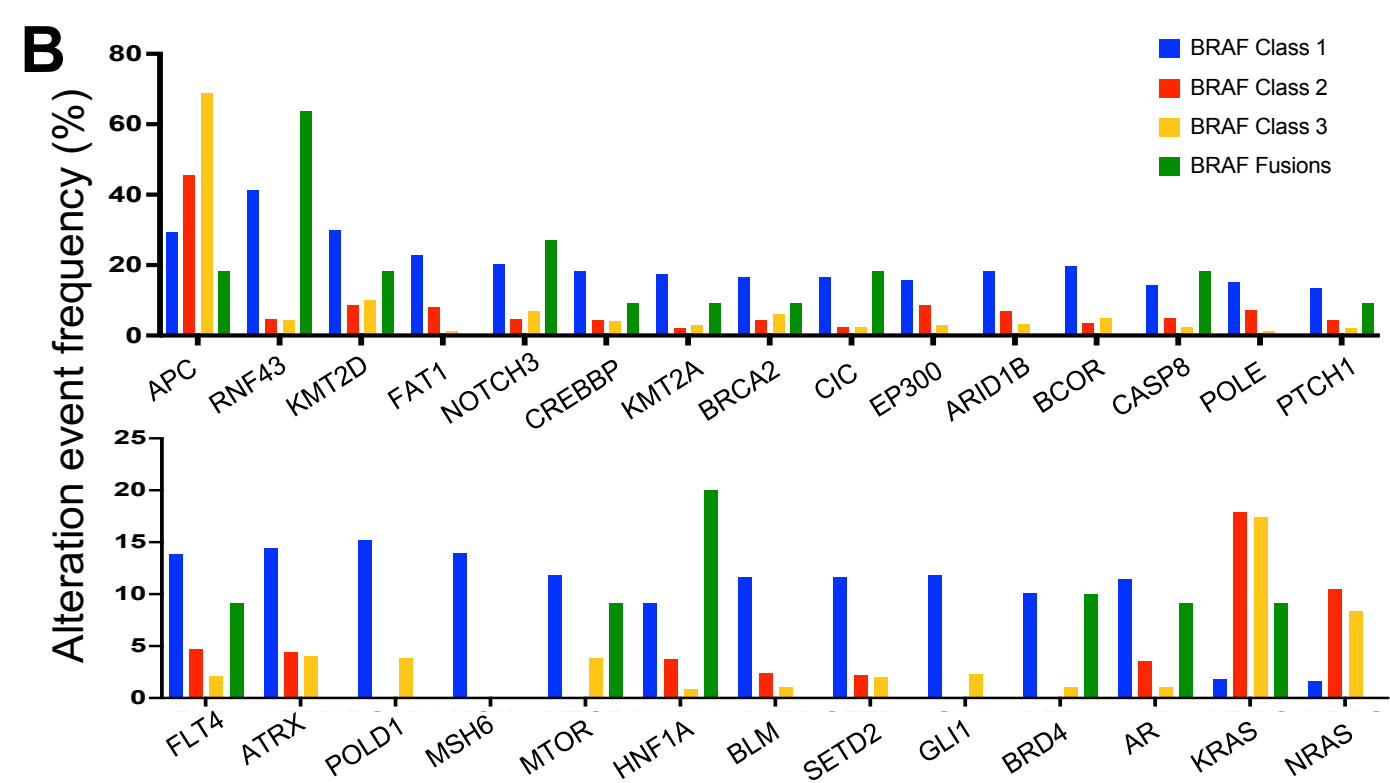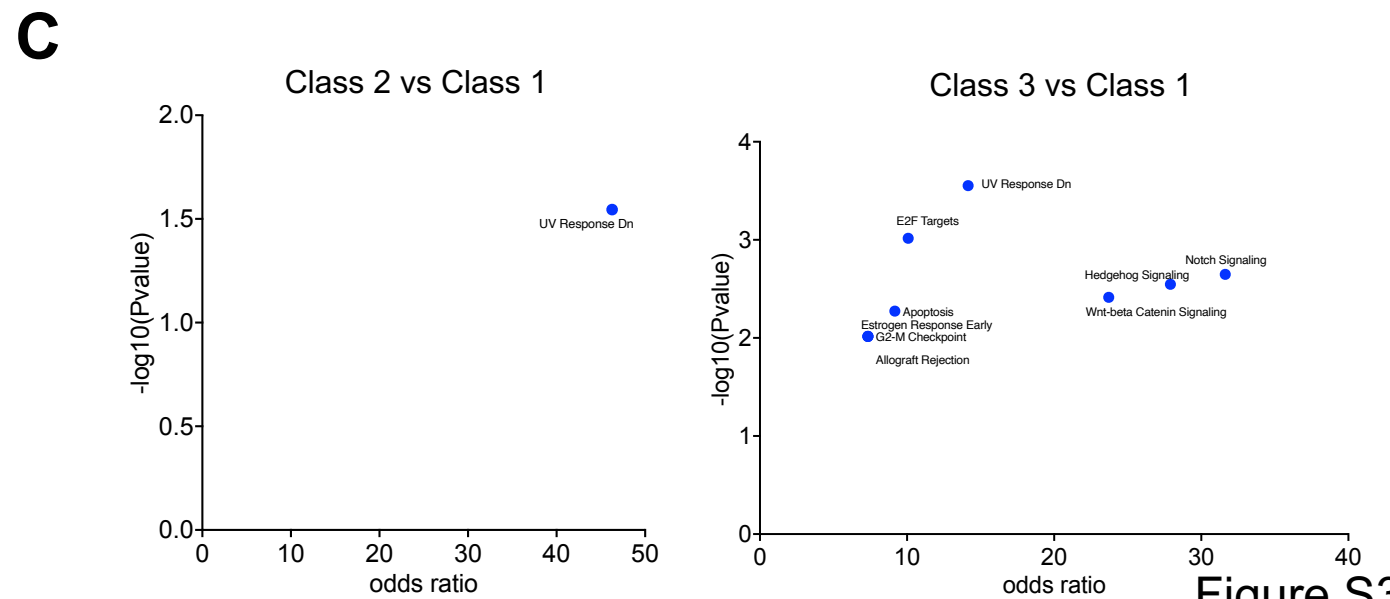

Figure S3

**A**

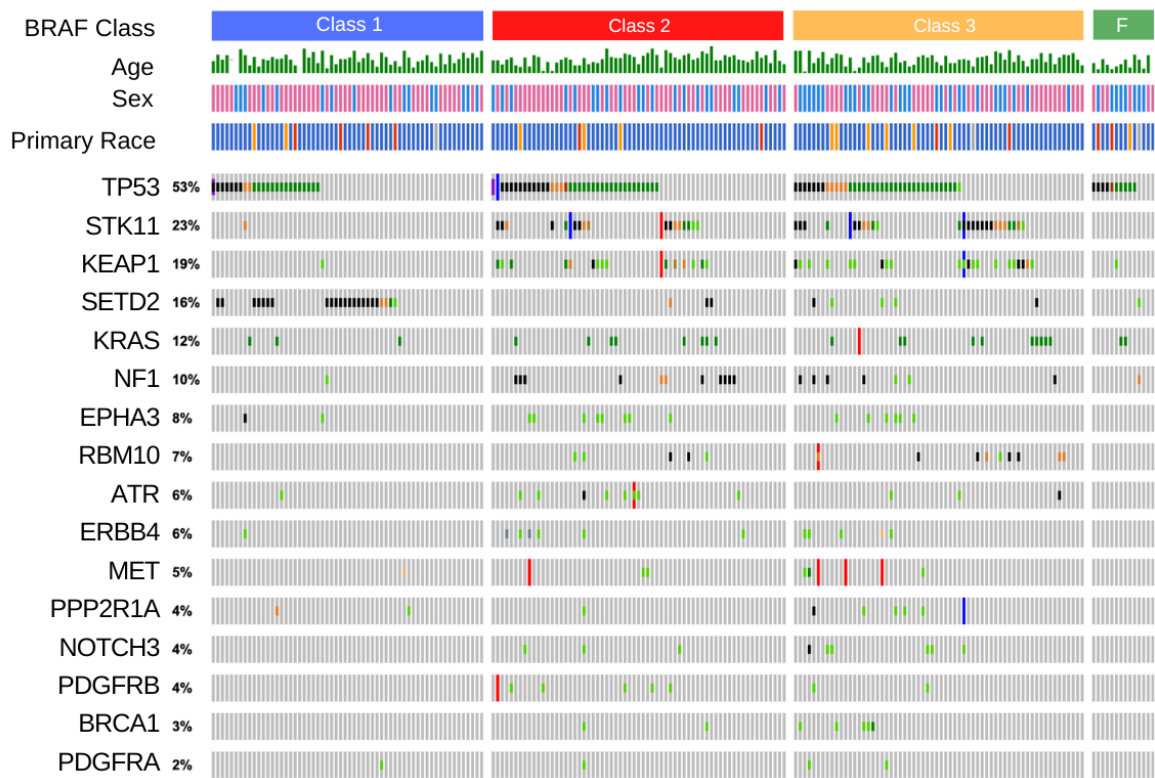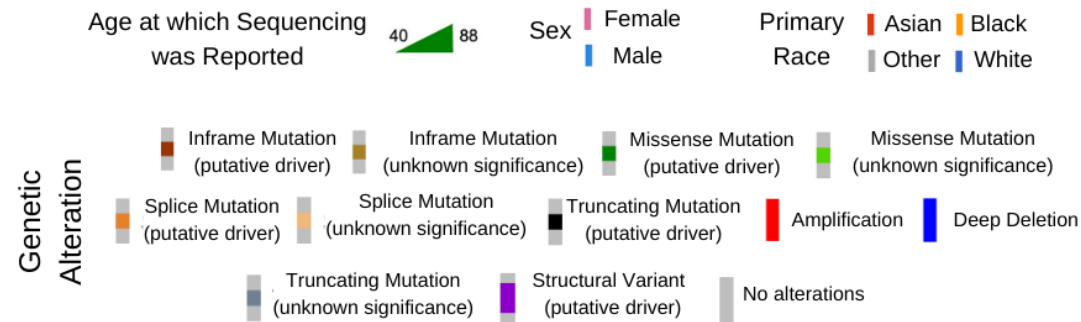

**B**

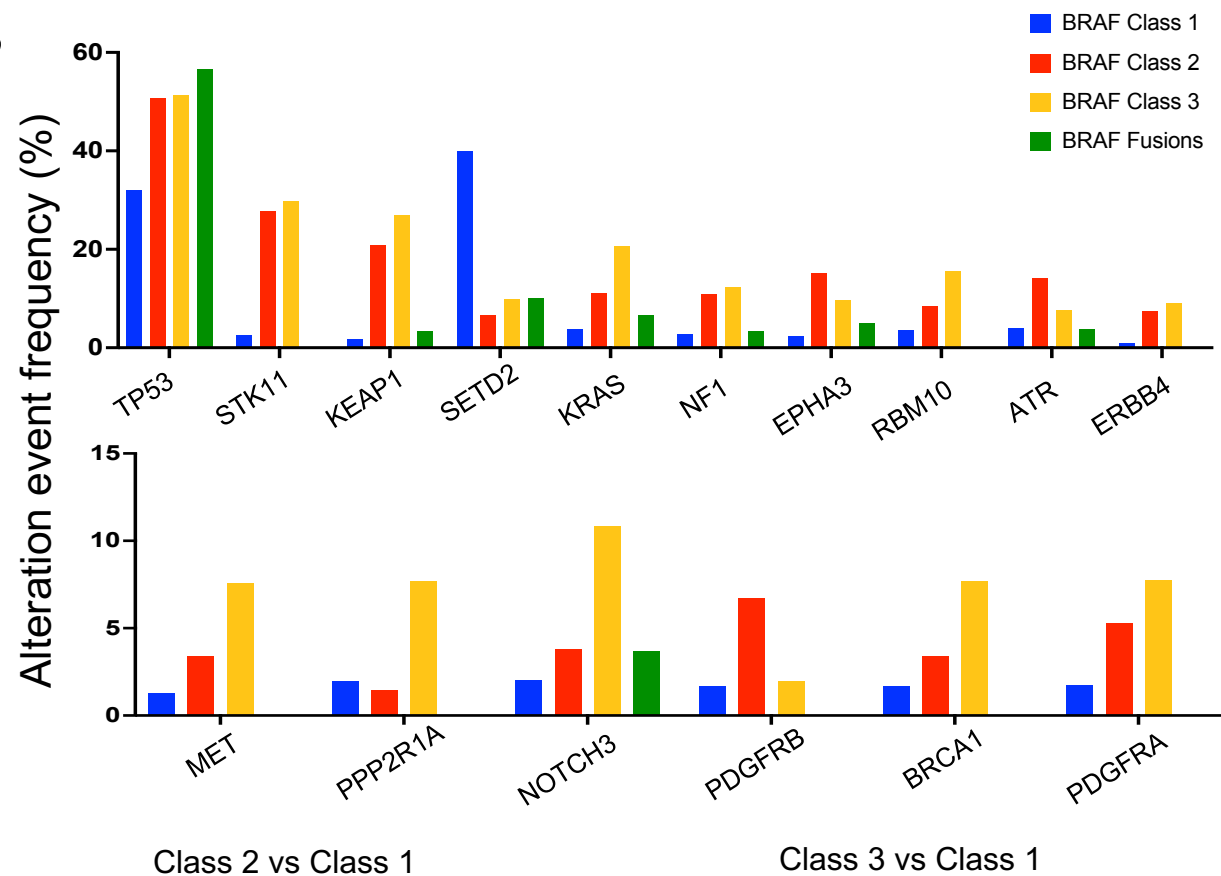

**C**

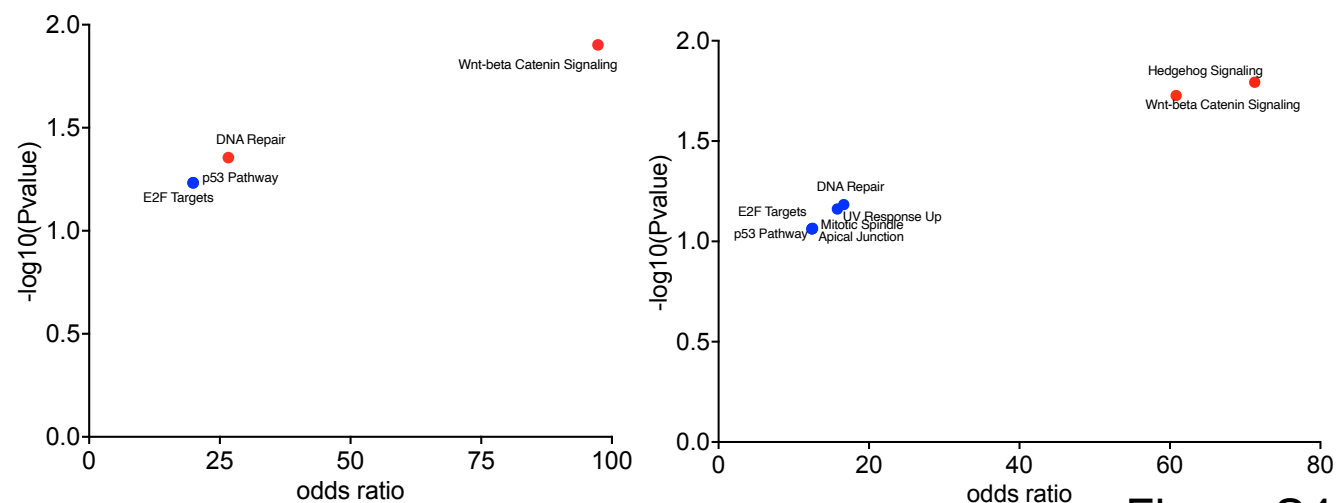

Figure S4

## A. Class 2 vs. Class 1

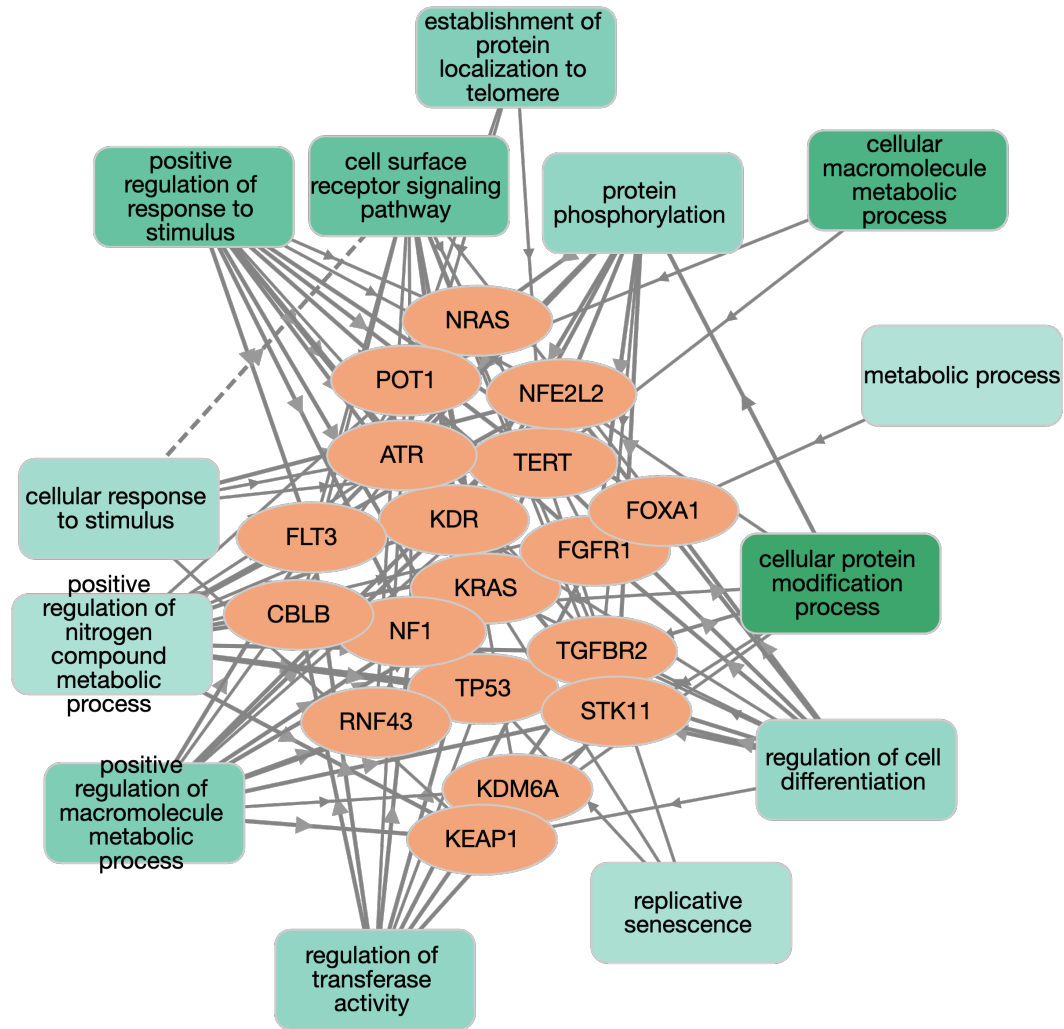

## B. Class 3 vs. Class 1

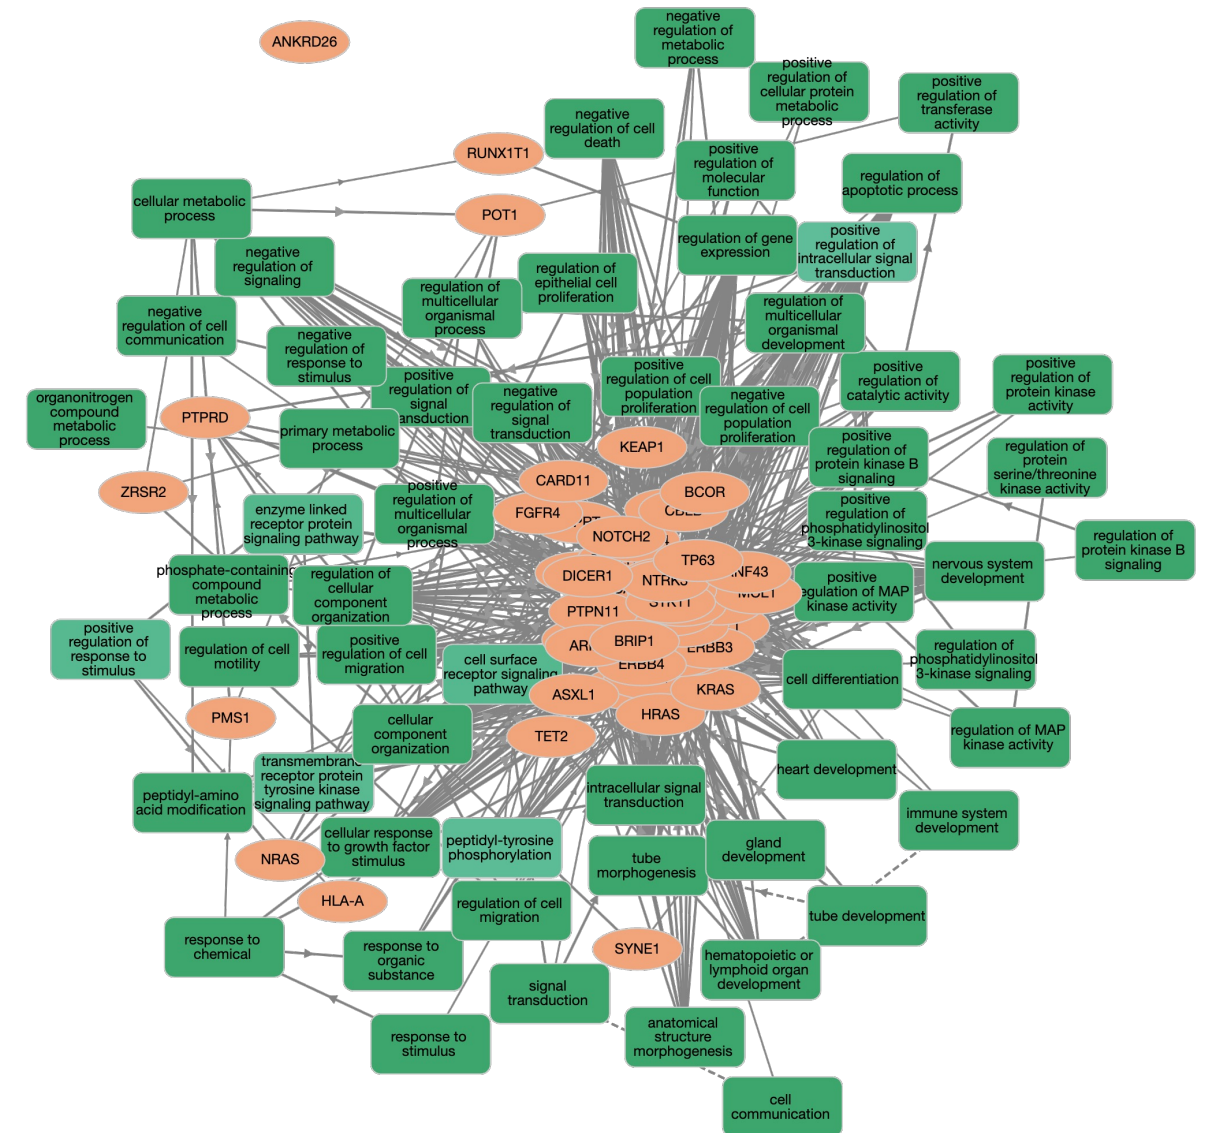

Figure S5



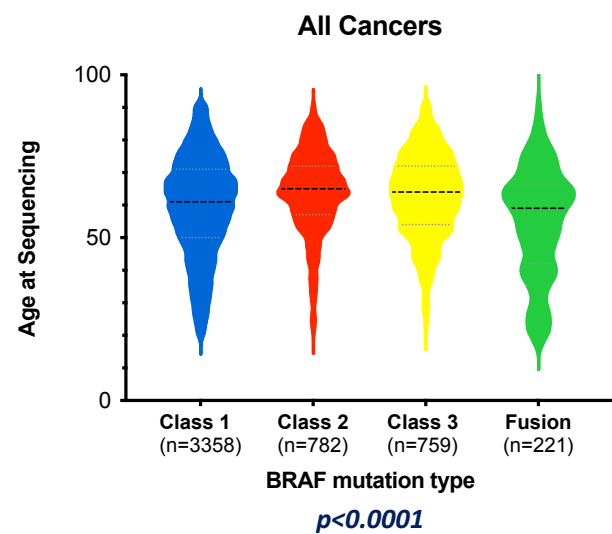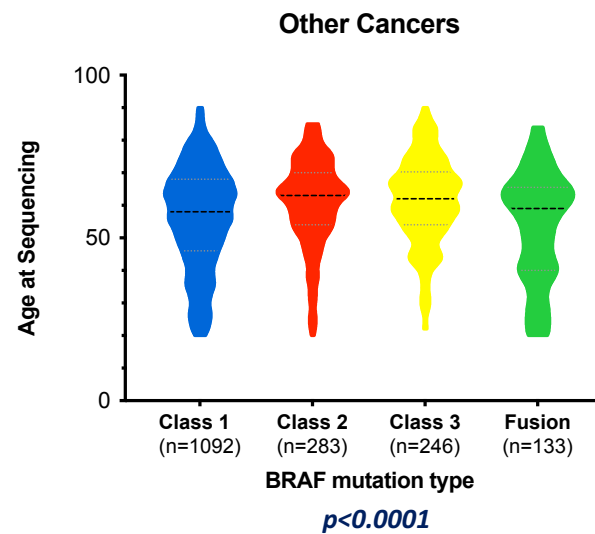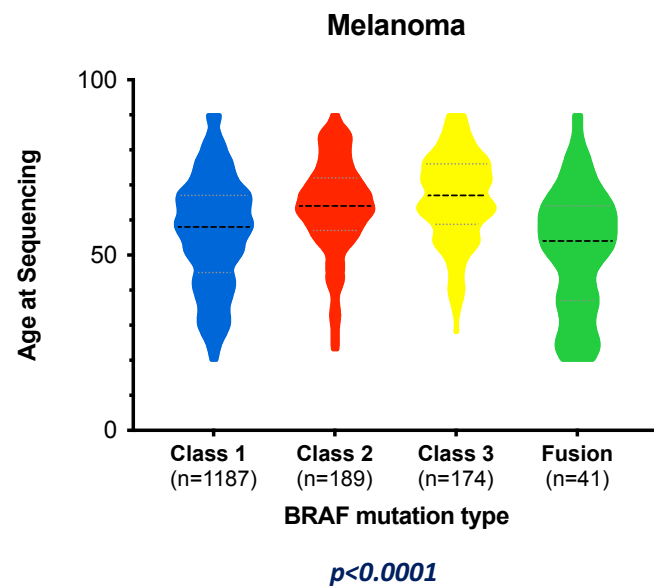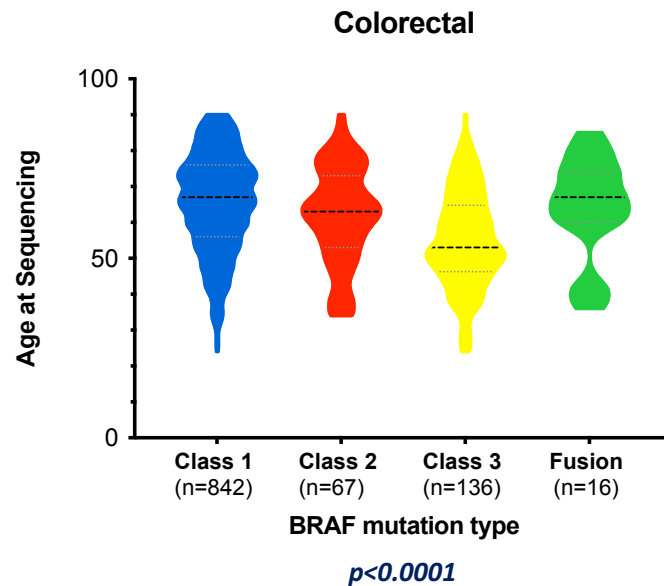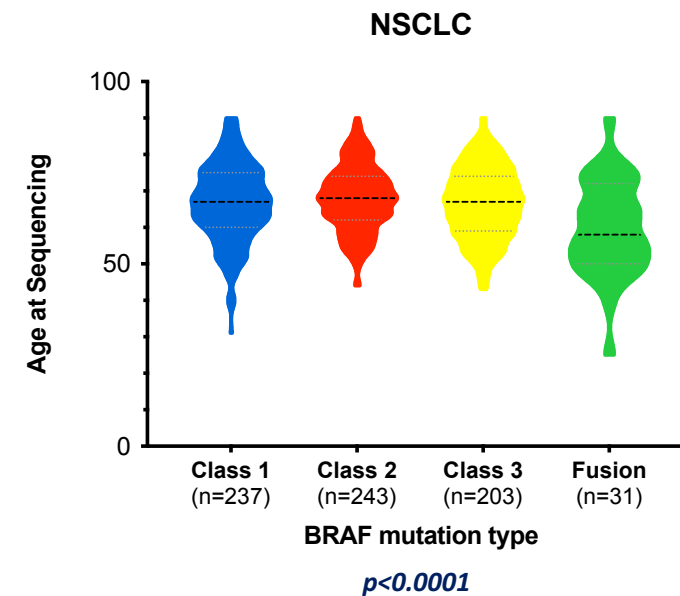

Figure S6
