# Supplementary material for: The Clinical, Genomic, and Transcriptomic Landscape of BRAF Mutant Cancers
Source: Cancers (Basel). 2024 Jan 19;16(2):445. doi: 10.3390/cancers16020445 (PMC10814895; doi:10.3390/cancers16020445)
Supplement: Supplementary file 1 [file cancers-16-00445-s001.zip]

Archive with 6 entries (6 files):
- Supplemental Figure and Table Legends.pdf
- Supplemental Methods & Figures.pdf
- Supplementary Tables S1-S18.xlsx
- Table S19- RNA expression Heatmap Genes CRC.xlsx
- Table S20- RNA expression Heatmap Genes NSCLC.xlsx
- Table S21- RNA expression Heatmap Genes Melanoma.xlsx
