# Supplementary material for: The Clinical, Genomic, and Transcriptomic Landscape of BRAF Mutant Cancers
Source: Cancers (Basel). 2024 Jan 19;16(2):445. doi: 10.3390/cancers16020445 (PMC10814895; doi:10.3390/cancers16020445)
Supplement: Supplementary file 1 [file cancers-16-00445-s001.zip › Supplementary Tables S1-S18.xlsx]

## Sheet: S1 Incidence BRAF Alterations
Table S1: Incidence and Classification of BRAF alterations
BRAF Class	Protein Change	Occurrence in dataset	BRAF Class	Protein Change	Occurrence in dataset	BRAF Class	Protein Change	Occurrence in dataset	BRAF Class	Protein Change	Occurrence in dataset
1	V600_K601delinsEI	1	2	K601E/I/N/Q	181	2	V504_R506dup	1	Fusion	AGK-BRAF fusion	11
1	V600_K601delinsEN	1	2	L485_A489delinsFS	1	2	V600_K601delinsE	14	Fusion	BRAF-AGK	3
1	V600_S602delinsRKT	1	2	L485_P490delinsF	1	2	V600_R603del	2	Fusion	BRAF-CDK5RAP2 fusion	3
1	V600D/E/G/K/L/R	3355	2	L485F/S/W	16	2	V600_S602del	1	Fusion	BRAF-INTERGENIC	16
2	A598_T599insI	1	2	L505H	2	2	V600_W604delinsDG/G/R	5	Fusion	BRAF-KIAA1549	10
2	A598D	1	2	L597P/Q/R/S/V	70	2	X506_X506insRYSG	2	Fusion	BRAF-MKRN1	16
2	A598dup	1	2	M484_L485delinsIM	1	3	D594A/E/G/H/N/V/Y	303	Fusion	BRAF-NDUFB2	3
2	D594_T599dup	23	2	N486_A489delinsK	1	3	E501K/Q/V	15	Fusion	BRAF-SND1	18
2	E586K	13	2	N486_A489delinsR	1	3	F247L	6	Fusion	BRAF-TMPRSS2 fusion	3
2	F468S	8	2	N486_P490del	30	3	G466A/E/L/R/V	174	Fusion	BRAF-TRIM24 fusion	3
2	F595I/L/S	12	2	P367L/S	12	3	G469E	31	Fusion	KIAA1549-BRAF fusion	6
2	G464A/E/I/R/V	48	2	S602_R603dup	1	3	G596C/D/R/S/V	43	Fusion	Other Fusions	126
2	G469A/I/K/L/L/R/S/V	295	2	T599_V600delinsR	1	3	K483E/N/T	13
2	I592_A598dup	1	2	T599_V600insDT/EIAT/H/Q	5	3	N581D/H/I/S/T/Y	134
2	K499E	1	2	T599delinsIP	3	3	Q257R	2
2	K601_S602delinsNT	1	2	T599dup	17	3	S467L	34
2	K601_S605delinsD	1	2	T599I	5	3	V471F	4
2	K601_S605delinsN	2	2	V487_P492delinsA	1	Fusion	AGAP3-BRAF fusion	3

## Sheet: S2 All Cancer Class1+2+3
Table S2: Co-Mutations across all cancer types in BRAF Class 1, 2 and 3
Gene	Cytoband	Class 1	Class 1 %	Class 2	Class 2 %	Class 3	Class 3 %	pValue	qValue	Most Enriched In
KEAP1	19p13.2	53	2.24	43	8.07	62	10.95	0	0	(C) BRAF Class 3
KRAS	12p12.1	36	1.08	66	8.81	129	17.36	0	0	(C) BRAF Class 3
NF1	17q11.2	143	5.62	79	12.87	138	23.23	0	0	(C) BRAF Class 3
NRAS	1p13.2	33	0.99	46	6.14	92	12.38	0	0	(C) BRAF Class 3
SERPINB4	18q21.33	0	0	1	20	0	0	0	0	(B) BRAF Class 2
STK11	19p13.3	56	1.71	79	11.53	79	11	0	0	(B) BRAF Class 2
TP53	17p13.1	894	26.71	278	39.66	326	44.23	0	0	(C) BRAF Class 3
APC	5q22.2	356	11.33	85	12.01	159	22.62	7.77e-15	1.14e-12	(C) BRAF Class 3
RNF43	17q22	261	11.73	17	3.4	21	4.04	2.24e-12	2.85e-10	(A) BRAF Class 1 v12
HRAS	11p15.5	17	0.51	13	1.74	27	3.64	2.43e-12	2.85e-10	(C) BRAF Class 3
FLT3	13q12.2	100	3.1	49	7.31	47	6.63	1.83e-08	1.945e-06	(B) BRAF Class 2
TERT	5p15.33	842	34.19	126	23.2	144	26.23	8.07e-08	7.877e-06	(A) BRAF Class 1 v12
ATXN2	12q24.12	1	4	0	0	0	0	3.25e-07	2.719e-05	(A) BRAF Class 1 v12
DUSP22	6p25.3	1	4	0	0	0	0	3.25e-07	2.719e-05	(A) BRAF Class 1 v12
POT1	7q31.33	13	1.55	16	8.89	12	5.97	3.69e-07	2.878e-05	(B) BRAF Class 2
SMARCA4	19p13.2	160	6.3	46	8.17	74	12.63	1.063e-06	7.778e-05	(C) BRAF Class 3
PPP2R1A	19q13.41	34	1.54	9	1.81	27	5.22	1.287e-06	8.868e-05	(C) BRAF Class 3
RMRP	9p13.3	0	0	0	0	1	100	1.371e-06	8.919e-05	(C) BRAF Class 3
ERBB4	2q34	204	6.29	69	9.47	82	11.47	1.526e-06	9.405e-05	(C) BRAF Class 3
NOTCH2	1p12	110	4.4	39	7.03	55	9.67	1.669e-06	9.769e-05	(C) BRAF Class 3
MCL1	1q21.2	25	1.02	8	1.45	22	3.82	5.216e-06	0.0002909	(C) BRAF Class 3
ERBB2	17q12	87	2.6	34	4.54	44	5.97	5.849e-06	0.0003113	(C) BRAF Class 3
MET	7q31.2	118	3.56	40	5.38	55	7.49	6.855e-06	0.000349	(C) BRAF Class 3
ETAA1	2p14	1	3.13	0	0	0	0	8.273e-06	0.0003726	(A) BRAF Class 1 v12
FOXF1	16q24.1	1	3.13	0	0	0	0	8.273e-06	0.0003726	(A) BRAF Class 1 v12
SLFN11	17q12	1	3.13	0	0	0	0	8.273e-06	0.0003726	(A) BRAF Class 1 v12
ARID1A	1p36.11	267	10.51	80	14.21	99	16.89	2.675e-05	0.001148	(C) BRAF Class 3
CBLB	3q13.11	16	1.52	13	5.86	14	5.58	2.782e-05	0.001148	(B) BRAF Class 2
GNA14	9q21.2	0	0	3	20	0	0	2.842e-05	0.001148	(B) BRAF Class 2
KDR	4q12	162	5.08	58	8.71	59	8.43	4.159e-05	0.001623	(B) BRAF Class 2
PTPN11	12q24.13	36	1.11	14	2.06	24	3.36	4.62e-05	0.001745	(C) BRAF Class 3
MAP3K5	6q23.3	0	0	1	4	4	13.33	5.38e-05	0.001969	(C) BRAF Class 3
PDGFRA	4q12	101	3.1	36	4.95	46	6.37	5.805e-05	0.00206	(C) BRAF Class 3
COL2A1	12q13.11	5	3.21	6	24	6	20	6.404e-05	0.002183	(B) BRAF Class 2
EPHA3	3p11.1	92	4.84	36	8.49	42	9.74	6.525e-05	0.002183	(C) BRAF Class 3
FGFR1	8p11.23	54	1.62	29	3.87	24	3.26	8.703e-05	0.002761	(B) BRAF Class 2
SYNE1	6q25.2	11	2.14	6	8	10	10.64	8.723e-05	0.002761	(C) BRAF Class 3
ERBB3	12q13.2	81	3.15	29	4.71	41	6.86	9.777e-05	0.003013	(C) BRAF Class 3
IL2RB	22q12.3	0	0	2	16.67	0	0	0.0001252	0.003759	(B) BRAF Class 2
RHPN2	19q13.11	6	1.7	4	5.88	8	11.59	0.0001977	0.005787	(C) BRAF Class 3
TET2	4q24	155	6.22	41	7.32	65	11.09	0.0002154	0.006151	(C) BRAF Class 3
RHOH	4p14	3	0.44	0	0	6	3.57	0.0002714	0.007568	(C) BRAF Class 3
ATR	3q23	126	5.7	53	10.66	33	6.38	0.0002915	0.007938	(B) BRAF Class 2
HLA-A	6p22.1	48	3.94	3	1.07	0	0	0.000301	0.00801	(A) BRAF Class 1 v12
PTPRT	20q12-q13.11	159	11.26	37	11.86	60	19.54	0.0003539	0.009179	(C) BRAF Class 3
CDKN1C	11p15.4	5	0.51	7	3.33	1	0.44	0.0003606	0.009179	(B) BRAF Class 2
NFE2L2	2q31.2	31	1.22	19	3.37	16	2.73	0.000401	0.009991	(B) BRAF Class 2
FOXA1	14q21.1	39	1.98	22	4.97	7	1.54	0.0004206	0.0103	(B) BRAF Class 2
PIK3CA	3q26.32	311	9.29	75	10.01	104	14.05	0.0005298	0.0127	(C) BRAF Class 3
FGFR2	10q26.13	86	2.57	30	4.01	38	5.14	0.0005927	0.0139	(C) BRAF Class 3
PTPRD	9p24.1-p23	185	10.66	41	10.82	69	17.47	0.00062	0.014	(C) BRAF Class 3
SRC	20q11.23	22	0.83	10	1.85	15	2.69	0.0006211	0.014	(C) BRAF Class 3
FANCL	2p16.1	16	1.26	11	4.33	2	0.67	0.0006473	0.0143	(B) BRAF Class 2
PRKACA	19p13.12	0	0	2	5.56	0	0	0.0006576	0.0143	(B) BRAF Class 2
MSH3	5q14.1	95	8.89	8	3.49	8	3.36	0.0007249	0.0154	(A) BRAF Class 1 v12
KDM6A	Xp11.3	66	2.68	30	5.42	28	4.85	0.0008125	0.0168	(B) BRAF Class 2
RET	10q11.21	122	3.65	27	3.6	49	6.62	0.0008239	0.0168	(C) BRAF Class 3
ATM	11q22.3	256	8.04	65	9.76	87	12.43	0.0008322	0.0168	(C) BRAF Class 3
RAF1	3p25.2	37	1.42	16	2.55	22	3.64	0.0009321	0.0185	(C) BRAF Class 3
BRIP1	17q23.2	67	2.72	23	4.16	33	5.72	0.001031	0.0201	(C) BRAF Class 3
FLT1	13q12.3	130	5.28	36	6.51	54	9.36	0.001074	0.0206	(C) BRAF Class 3
NOTCH1	9q34.3	178	5.42	52	7.58	63	8.73	0.001152	0.0218	(C) BRAF Class 3
CASR	3q13.33-q21.1	3	3.26	3	20	3	30	0.001701	0.0313	(C) BRAF Class 3
IGF1	12q23.2	6	0.47	1	0.34	7	2.39	0.00171	0.0313	(C) BRAF Class 3
CARD11	7p22.2	157	6.38	43	7.78	61	10.57	0.00199	0.0359	(C) BRAF Class 3
SMAD3	15q22.33	25	1.69	7	2.13	16	4.86	0.00209	0.0371	(C) BRAF Class 3
EPHA7	6q16.1	108	6.08	39	10.16	38	9.84	0.002166	0.0379	(B) BRAF Class 2
DDX31	9q34.13	1	1.09	3	20	1	10	0.002295	0.0391	(B) BRAF Class 2
DGKH	13q14.11	0	0	2	16.67	2	10	0.002305	0.0391	(B) BRAF Class 2
SMC1A	Xp11.22	9	1	7	4.67	2	1.17	0.002444	0.0409	(B) BRAF Class 2
PBRM1	3p21.1	107	4.51	37	6.94	43	7.6	0.003178	0.0522	(C) BRAF Class 3
EGFR	7p11.2	131	3.92	28	3.74	49	6.62	0.003237	0.0522	(C) BRAF Class 3
H3F3B	17q25.1	6	0.32	5	1.19	7	1.65	0.003323	0.0522	(C) BRAF Class 3
CBL	11q23.3	57	2.22	17	2.98	28	4.71	0.003335	0.0522	(C) BRAF Class 3
TGFBR2	3p24.1	112	7.13	9	2.51	19	5.25	0.003345	0.0522	(A) BRAF Class 1 v12
DICER1	14q32.13	91	3.78	19	3.58	38	6.87	0.00355	0.0547	(C) BRAF Class 3
NTRK3	15q25.3	110	4.33	34	6.04	44	7.51	0.003767	0.0573	(C) BRAF Class 3
ANKRD26	10p12.1	45	13.51	1	2.5	0	0	0.003895	0.0579	(A) BRAF Class 1 v12
TP63	3q28	57	4.55	16	5.61	26	9.63	0.003906	0.0579	(C) BRAF Class 3
MKRN1	7q34	0	0	0	0	2	0.27	0.004026	0.0589	(C) BRAF Class 3
MAP3K13	3q27.2	20	1.52	7	2.22	14	4.52	0.004194	0.0606	(C) BRAF Class 3
ARID2	12q12	180	7.4	48	8.96	65	11.61	0.004291	0.0613	(C) BRAF Class 3
AIP	11q13.2	0	0	0	0	1	10	0.004534	0.0634	(C) BRAF Class 3
EFNB3	17p13.1	0	0	0	0	1	20	0.004548	0.0634	(C) BRAF Class 3
KIT	4q12	79	2.36	26	3.47	33	4.44	0.004671	0.0644	(C) BRAF Class 3
EZH1	17q21.2	7	1.05	1	0.62	7	4.4	0.004868	0.0663	(C) BRAF Class 3
ELOC	8q21.11	6	0.33	3	0.74	7	1.7	0.005176	0.0697	(C) BRAF Class 3
EPHA2	1p36.13	0	0	0	0	2	4.08	0.005529	0.0736	(C) BRAF Class 3
PMS1	2q32.2	55	2.38	14	2.75	26	4.97	0.00564	0.0736	(C) BRAF Class 3
KMT2D	12q13.12	361	14.69	88	15.91	116	20.1	0.005656	0.0736	(C) BRAF Class 3
GATA6	18q11.2	28	1.98	14	4.91	13	4.02	0.006105	0.0786	(B) BRAF Class 2
OR5L1	11q12.1	1	1.16	2	16.67	3	15	0.00625	0.0786	(B) BRAF Class 2
CXCR4	2q22.1	12	0.63	9	2.07	8	1.81	0.006266	0.0786	(B) BRAF Class 2
PLCB4	20p12.3-p12.2	5	2.31	4	10	5	11.9	0.006334	0.0786	(C) BRAF Class 3
XRCC3	14q32.33	20	2.92	0	0	0	0	0.006378	0.0786	(A) BRAF Class 1 v12
TRAF7	16p13.3	44	2.26	6	1.37	20	4.48	0.006663	0.0803	(C) BRAF Class 3
JAK3	19p13.11	102	3.17	34	4.74	38	5.36	0.006712	0.0803	(C) BRAF Class 3
EBF1	5q33.3	1	0.44	2	5.13	3	6.67	0.00672	0.0803	(C) BRAF Class 3
DROSHA	5p13.3	24	4	1	0.66	11	7.91	0.007203	0.0852	(C) BRAF Class 3
ROS1	6q22.1	242	9.29	53	8.45	80	13.16	0.007317	0.0857	(C) BRAF Class 3
DDR2	1q23.3	55	2.06	22	3.42	25	4.03	0.007547	0.0874	(C) BRAF Class 3
PTK2B	8p21.2	22	3.41	6	4.26	15	9.04	0.007662	0.0874	(C) BRAF Class 3
QKI	6q26	48	3.62	3	1.13	3	0.96	0.007691	0.0874	(A) BRAF Class 1 v12
RUNX1T1	8q21.3	56	4.49	17	7.14	25	8.83	0.008009	0.0902	(C) BRAF Class 3
ASXL1	20q11.21	130	5.22	31	5.55	50	8.53	0.00825	0.092	(C) BRAF Class 3
NKX2-1-AS1	14q13.3	0	0	1	2.5	0	0	0.008448	0.0926	(B) BRAF Class 2
SPOP	17q21.33	20	0.91	9	1.81	13	2.51	0.008463	0.0926	(C) BRAF Class 3
JAK2	9p24.1	62	1.95	20	2.8	27	3.82	0.008753	0.0949	(C) BRAF Class 3
LIFR	5p13.1	4	2.15	3	9.68	5	11.9	0.009069	0.0974	(C) BRAF Class 3
RRAS2	11p15.2	3	0.45	3	1.85	5	3.14	0.009221	0.0974	(C) BRAF Class 3
SF3B1	2q33.1	58	2.21	24	4.1	23	3.79	0.009248	0.0974	(B) BRAF Class 2
FGFR4	5q35.2	71	2.76	18	2.9	31	5.17	0.009389	0.0974	(C) BRAF Class 3
BCOR	Xp11.4	156	6.35	30	5.42	18	3.1	0.009481	0.0974	(A) BRAF Class 1 v12
MPL	1p34.2	51	1.63	22	3.33	18	2.58	0.009485	0.0974	(B) BRAF Class 2
SPTA1	1q23.1	95	15.13	25	26.04	27	22.31	0.009661	0.0982	(B) BRAF Class 2
CASP8	2q33.1	92	4.51	8	1.68	15	3.07	0.009724	0.0982	(A) BRAF Class 1 v12
CDKN2A	9p21.3	449	13.7	121	17.66	118	16.43	0.0104	0.104	(B) BRAF Class 2
EZH2	7q36.1	46	1.52	18	2.8	20	2.97	0.0106	0.105	(C) BRAF Class 3
PTPRB	12q15	8	5.13	5	20	5	16.67	0.0107	0.105	(B) BRAF Class 2
FBXW7	4q31.3	185	5.64	27	3.94	55	7.63	0.0113	0.111	(C) BRAF Class 3
EDNRB	13q22.3	0	0	1	8.33	0	0	0.0116	0.112	(B) BRAF Class 2
PRKCH	14q23.1	0	0	1	8.33	0	0	0.0116	0.112	(B) BRAF Class 2
HLA-B	6p21.33	25	4.08	1	0.63	1	0.63	0.0118	0.112	(A) BRAF Class 1 v12
HIF1A	14q23.2	0	0	1	2.33	2	3.92	0.0118	0.112	(C) BRAF Class 3
PRKCA	17q24.2	0	0	1	2.27	2	4.17	0.0122	0.114	(C) BRAF Class 3
NCKAP5	2q21.2	5	5.81	3	25	5	25	0.0125	0.117	(C) BRAF Class 3
PKHD1	6p12.3-p12.2	1	0.85	2	10.53	0	0	0.0134	0.123	(B) BRAF Class 2
DCLRE1C	10p13	7	1.2	6	4.58	1	0.68	0.0137	0.124	(B) BRAF Class 2
FGA	4q31.3	0	0	0	0	1	20	0.0137	0.124	(C) BRAF Class 3
CD74	5q33.1	3	0.65	3	3.95	0	0	0.0141	0.127	(B) BRAF Class 2
RSPO2	8q23.1	12	1.35	9	4.48	6	2.55	0.0146	0.13	(B) BRAF Class 2
FGF6	12p13.32	10	1.41	6	4.8	1	0.65	0.0147	0.13	(B) BRAF Class 2
MAP3K1	5q11.2	98	3.99	24	4.34	39	6.76	0.0152	0.134	(C) BRAF Class 3
H3F3A	1q42.12	13	0.52	7	1.28	0	0	0.0156	0.136	(B) BRAF Class 2
SETBP1	18q12.3	103	7.03	29	10.32	36	11.21	0.0158	0.136	(C) BRAF Class 3
TERC	3q26.2	0	0	1	0.74	2	1.23	0.0158	0.136	(C) BRAF Class 3
SMAD2	18q21.1	42	1.71	5	0.9	18	3.12	0.016	0.137	(C) BRAF Class 3
SOX17	8q11.23	55	4.65	6	2.21	19	7.42	0.0178	0.15	(C) BRAF Class 3
KEL	7q34	30	5.73	12	13.33	11	10.19	0.0179	0.15	(B) BRAF Class 2
HIST1H3C	6p22.2	8	0.46	3	0.76	7	1.79	0.018	0.15	(C) BRAF Class 3
BEND2	Xp22.13	1	1.09	2	13.33	0	0	0.018	0.15	(B) BRAF Class 2
PRDM14	8q13.3	14	2.64	2	1.44	9	6.98	0.0182	0.15	(C) BRAF Class 3
ZFHX4	8q21.13	18	11.54	6	24	9	30	0.0183	0.15	(C) BRAF Class 3
B2M	15q21.1	87	4.01	10	2.06	10	2.03	0.0188	0.153	(A) BRAF Class 1 v12
ESR1	6q25.1-q25.2	55	2.08	12	1.9	24	3.91	0.0192	0.155	(C) BRAF Class 3
ADGRL3	4q13.1	0	0	1	12.5	0	0	0.0196	0.157	(B) BRAF Class 2
FOXO1	13q14.11	28	2.06	4	1.33	13	4.48	0.0209	0.167	(C) BRAF Class 3
PRSS1	7q34	20	2.75	8	4.91	13	6.88	0.0217	0.172	(C) BRAF Class 3
ZRSR2	Xp22.2	41	1.82	10	2.02	1	0.2	0.0221	0.173	(B) BRAF Class 2
ZNF521	18q11.2	1	0.82	0	0	2	9.09	0.0225	0.173	(C) BRAF Class 3
RBM10	Xp11.3	81	3.92	19	4.01	33	6.71	0.0227	0.173	(C) BRAF Class 3
TCF12	15q21.3	1	0.5	2	5.56	0	0	0.0227	0.173	(B) BRAF Class 2
NFKBIZ	3q12.3	14	1.53	2	1.02	9	4.19	0.0228	0.173	(C) BRAF Class 3
THBS1	15q14	1	0.85	0	0	2	9.52	0.0228	0.173	(C) BRAF Class 3
CCNQ	Xq28	6	1.13	2	1.44	6	4.65	0.0229	0.173	(C) BRAF Class 3
ADAMTS20	12q12	3	2.56	0	0	3	14.29	0.0234	0.175	(C) BRAF Class 3
CIITA	16p13.13	48	4.83	20	9.35	17	7.33	0.0238	0.177	(B) BRAF Class 2
ABCB11	2q31.1	33	5.06	9	6.25	17	10.9	0.025	0.183	(C) BRAF Class 3
FZR1	19p13.3	0	0	1	5.26	0	0	0.0259	0.183	(B) BRAF Class 2
LTF	3p21.31	0	0	1	5.26	0	0	0.0259	0.183	(B) BRAF Class 2
SOX11	2p25.2	0	0	1	5.26	0	0	0.0259	0.183	(B) BRAF Class 2
IKZF1	7p12.2	121	4.93	26	4.72	44	7.65	0.026	0.183	(C) BRAF Class 3
PTPRS	19p13.3	110	9.3	20	7.35	11	4.3	0.026	0.183	(A) BRAF Class 1 v12
MECOM	3q26.2	70	7.35	13	6.28	28	12.39	0.026	0.183	(C) BRAF Class 3
PCM1	8p22	0	0	1	25	0	0	0.027	0.183	(B) BRAF Class 2
POLD1	19q13.33	131	6.36	17	3.61	21	4.35	0.0271	0.183	(A) BRAF Class 1 v12
CAD	2p23.3	0	0	1	7.14	0	0	0.0272	0.183	(B) BRAF Class 2
CPS1	2q34	0	0	1	7.14	0	0	0.0272	0.183	(B) BRAF Class 2
INPP5D	2q37.1	0	0	1	7.14	0	0	0.0272	0.183	(B) BRAF Class 2
MEF2C	5q14.3	0	0	1	7.14	0	0	0.0272	0.183	(B) BRAF Class 2
MKI67	10q26.2	0	0	1	7.14	0	0	0.0272	0.183	(B) BRAF Class 2
PTPN6	12p13.31	0	0	1	7.14	0	0	0.0272	0.183	(B) BRAF Class 2
TNFRSF11A	18q21.33	0	0	1	7.14	0	0	0.0272	0.183	(B) BRAF Class 2
WDR90	16p13.3	0	0	1	7.14	0	0	0.0272	0.183	(B) BRAF Class 2
HIST1H3B	6p22.2	19	0.91	11	2.37	5	1.07	0.0283	0.189	(B) BRAF Class 2
YES1	18p11.32	21	1.78	4	1.47	11	4.3	0.0283	0.189	(C) BRAF Class 3
PLCG1	20q12	0	0	1	5	0	0	0.0288	0.191	(B) BRAF Class 2
GRIN2A	16p13.2	159	10.37	40	11.73	53	15.36	0.0295	0.193	(C) BRAF Class 3
ICK	6p12.1	0	0	1	5	0	0	0.0295	0.193	(B) BRAF Class 2
IRF4	6p25.3	21	1.34	12	3.35	7	1.93	0.0305	0.198	(B) BRAF Class 2
FANCE	6p21.31	19	1.2	2	0.66	10	2.82	0.0312	0.202	(C) BRAF Class 3
JARID2	6p22.3	0	0	1	6.67	0	0	0.0313	0.202	(B) BRAF Class 2
TRIP11	14q32.12	0	0	1	4.76	0	0	0.0318	0.203	(B) BRAF Class 2
BIRC2	11q22.2	0	0	0	0	1	3.7	0.032	0.204	(C) BRAF Class 3
RRAS	19q13.33	3	0.45	1	0.62	4	2.52	0.0322	0.204	(C) BRAF Class 3
HTRA1	10q26.13	0	0	1	6.67	0	0	0.0324	0.204	(B) BRAF Class 2
RASA2	3q23	2	0.91	1	2.78	3	6.98	0.0331	0.207	(C) BRAF Class 3
TFEB	6p21.1	1	0.45	0	0	2	4.55	0.0335	0.208	(C) BRAF Class 3
CCND2	12p13.32	25	0.99	5	0.89	13	2.23	0.0344	0.213	(C) BRAF Class 3
CSDE1	1p13.2	10	1.19	6	3.39	6	3.39	0.0355	0.217	(C) BRAF Class 3
IPMK	10q21.1	1	0.64	2	8	1	3.33	0.0357	0.217	(B) BRAF Class 2
BRCA1	17q21.31	101	3.98	29	4.74	38	6.39	0.036	0.217	(C) BRAF Class 3
NF2	22q12.2	58	2.25	18	3.17	24	4.05	0.0366	0.217	(C) BRAF Class 3
MN1	22q12.1	0	0	1	2.94	0	0	0.0366	0.217	(B) BRAF Class 2
HIST1H1E	6p22.2	0	0	1	4.76	0	0	0.0375	0.217	(B) BRAF Class 2
DNM2	19p13.2	0	0	1	5.56	0	0	0.0378	0.217	(B) BRAF Class 2
MAML2	11q21	1	0.39	0	0	2	3.85	0.038	0.217	(C) BRAF Class 3
BCL3	19q13.32	0	0	0	0	1	4.55	0.038	0.217	(C) BRAF Class 3
HOOK3	8p11.21	0	0	0	0	1	4.55	0.038	0.217	(C) BRAF Class 3
LPP	3q27.3-q28	0	0	0	0	1	4.55	0.038	0.217	(C) BRAF Class 3
NUMA1	11q13.4	0	0	0	0	1	4.55	0.038	0.217	(C) BRAF Class 3
RALGDS	9q34.13-q34.2	0	0	0	0	1	4.55	0.038	0.217	(C) BRAF Class 3
G6PD	Xq28	0	0	0	0	1	4.76	0.0384	0.217	(C) BRAF Class 3
MAGEA1	Xq28	0	0	0	0	1	4.76	0.0384	0.217	(C) BRAF Class 3
MAGI1	3p14.1	0	0	0	0	1	4.76	0.0384	0.217	(C) BRAF Class 3
MMP2	16q12.2	0	0	0	0	1	4.76	0.0384	0.217	(C) BRAF Class 3
USP9X	Xp11.4	0	0	0	0	1	4.76	0.0384	0.217	(C) BRAF Class 3
RARA	17q21.2	43	1.75	18	3.25	8	1.39	0.039	0.219	(B) BRAF Class 2
DUSP4	8p12	8	1.2	6	3.7	1	0.63	0.0401	0.224	(B) BRAF Class 2
KLF6	10p15.2	0	0	0	0	1	4.35	0.0402	0.224	(C) BRAF Class 3
MAP2K1	15q22.31	71	2.63	29	4.5	21	3.36	0.0413	0.228	(B) BRAF Class 2
NOTCH3	19p13.12	219	9.99	38	7.74	64	12.52	0.0413	0.228	(C) BRAF Class 3
SPRED1	15q14	11	1.66	8	4.94	5	3.14	0.0429	0.232	(B) BRAF Class 2
NUP98	11p15.4	0	0	0	0	1	4	0.0434	0.232	(C) BRAF Class 3
ZMYM2	13q12.11	0	0	0	0	1	4.55	0.0436	0.232	(C) BRAF Class 3
FGF8	10q24.32	2	0.6	2	5	1	2.08	0.0437	0.232	(B) BRAF Class 2
NTRK2	9q21.33	53	2.09	19	3.37	21	3.58	0.0438	0.232	(C) BRAF Class 3
BOD1L1	4p15.33	0	0	1	12.5	1	12.5	0.0452	0.232	(C) BRAF Class 3
CDKN1A	6p21.2	15	0.63	7	1.3	9	1.6	0.0453	0.232	(C) BRAF Class 3
PAX8	2q14.1	8	1.39	1	1.19	5	4.9	0.0462	0.232	(C) BRAF Class 3
AURKB	17p13.1	24	0.98	10	1.81	2	0.35	0.0465	0.232	(B) BRAF Class 2
DDX3X	Xp11.4	3	1.2	0	0	3	5.77	0.0465	0.232	(C) BRAF Class 3
PAK5	20p12.2	80	6.21	26	8.72	29	9.9	0.0468	0.232	(C) BRAF Class 3
LMO3	12p12.3	0	0	0	0	1	1.45	0.047	0.232	(C) BRAF Class 3
GLI1	12q13.3	114	4.96	16	3.17	34	6.5	0.0473	0.232	(C) BRAF Class 3
BARD1	2q35	38	1.79	10	2.05	18	3.54	0.0473	0.232	(C) BRAF Class 3
DAXX	6p21.32	41	1.98	8	1.68	18	3.69	0.0486	0.232	(C) BRAF Class 3
SESN2	1p35.3	5	0.94	2	1.44	5	3.88	0.0491	0.232	(C) BRAF Class 3
AXL	19q13.2	97	3.82	28	4.97	35	5.97	0.0505	0.232	(C) BRAF Class 3
FANCF	11p14.3	10	0.63	6	1.97	5	1.41	0.0511	0.232	(B) BRAF Class 2
ITK	5q33.3	12	2.01	6	4.44	8	5.37	0.0519	0.232	(C) BRAF Class 3
PDK1	2q31.1	8	1.13	5	4	2	1.3	0.0522	0.232	(B) BRAF Class 2
FANCA	16q24.3	90	3.54	28	4.97	32	5.46	0.0526	0.232	(C) BRAF Class 3
E2F3	6p22.3	10	0.85	6	2.21	6	2.34	0.0529	0.232	(C) BRAF Class 3
PAX5	9p13.2	53	2.13	17	3.04	22	3.77	0.0537	0.232	(C) BRAF Class 3
ATRX	Xq21.1	167	6.57	38	6.75	55	9.39	0.0541	0.232	(C) BRAF Class 3
USP6	17p13.2	2	1.18	2	6.67	2	7.69	0.0547	0.232	(C) BRAF Class 3
NRG1	8p12	52	5.07	13	6.74	20	9.22	0.055	0.232	(C) BRAF Class 3
ASH2L	8p11.23	0	0	1	4	1	3.33	0.0553	0.232	(B) BRAF Class 2
AKAP9	7q21.2	0	0	1	4.76	1	4.55	0.0565	0.232	(B) BRAF Class 2
PBX1	1q23.3	0	0	1	4.76	1	4.55	0.0565	0.232	(B) BRAF Class 2
CTNNB1	3p22.1	113	3.38	32	4.27	38	5.14	0.0572	0.232	(C) BRAF Class 3
SETD2	3p21.31	224	8.82	40	7.1	65	11.09	0.0573	0.232	(C) BRAF Class 3
COL1A1	17q21.33	4	1.56	3	6.82	3	5.77	0.0592	0.232	(B) BRAF Class 2
ERCC4	16p13.12	52	2.27	13	2.48	4	0.74	0.0596	0.232	(B) BRAF Class 2
RASA1	5q14.3	39	2.08	15	3.54	16	3.7	0.0597	0.232	(C) BRAF Class 3
WAS	Xp11.23	10	1.45	2	1.32	7	4.12	0.0611	0.232	(C) BRAF Class 3
USP8	15q21.2	14	2.36	5	3.73	9	6.16	0.0615	0.232	(C) BRAF Class 3
STAG2	Xq25	73	2.97	22	3.98	28	4.85	0.0617	0.232	(C) BRAF Class 3
NCOA2	8q13.3	6	2.34	4	9.09	3	5.77	0.0625	0.232	(B) BRAF Class 2
BCL2	18q21.33	13	0.53	6	1.09	8	1.39	0.0628	0.232	(C) BRAF Class 3
CDKN2B	9p21.3	208	8.21	58	10.38	63	10.79	0.0631	0.232	(C) BRAF Class 3
LEF1	4q25	0	0	1	2.7	1	2.27	0.0631	0.232	(B) BRAF Class 2
RPS6KB2	11q13.2	21	1.78	9	3.31	10	3.91	0.0632	0.232	(C) BRAF Class 3
ACP2	11p11.2|11p12-p11	0	0	0	0	1	0.13	0.0635	0.232	(C) BRAF Class 3
ARHGEF38	4q24	0	0	0	0	1	0.13	0.0635	0.232	(C) BRAF Class 3
C1ORF147	1q32.1	0	0	0	0	1	0.13	0.0635	0.232	(C) BRAF Class 3
CACNA1C	12p13.33	0	0	0	0	1	0.13	0.0635	0.232	(C) BRAF Class 3
CCHCR1	6p21.33	0	0	0	0	1	0.13	0.0635	0.232	(C) BRAF Class 3
DAP	5p15.2	0	0	0	0	1	0.13	0.0635	0.232	(C) BRAF Class 3
DOCK8-AS1	9p24.3	0	0	0	0	1	0.13	0.0635	0.232	(C) BRAF Class 3
EIF2S3	Xp22.11	0	0	0	0	1	0.13	0.0635	0.232	(C) BRAF Class 3
ENSA	1q21.3	0	0	0	0	1	0.13	0.0635	0.232	(C) BRAF Class 3
FNDC3B	3q26.31	0	0	0	0	1	0.13	0.0635	0.232	(C) BRAF Class 3
GON4L	1q22	0	0	0	0	1	0.13	0.0635	0.232	(C) BRAF Class 3
GPD1	12q13.12	0	0	0	0	1	0.13	0.0635	0.232	(C) BRAF Class 3
HIPK2	7q34	0	0	0	0	1	0.13	0.0635	0.232	(C) BRAF Class 3
IGLJ5	22q11.22	0	0	0	0	1	0.13	0.0635	0.232	(C) BRAF Class 3
INHBE	12q13.3	0	0	0	0	1	0.13	0.0635	0.232	(C) BRAF Class 3
LINC00996	7q36.1	0	0	0	0	1	0.13	0.0635	0.232	(C) BRAF Class 3
LINC01514	10q24.31	0	0	0	0	1	0.13	0.0635	0.232	(C) BRAF Class 3
MIR99AHG	21q21.1	0	0	0	0	1	0.13	0.0635	0.232	(C) BRAF Class 3
NSRP1	17q11.2	0	0	0	0	1	0.13	0.0635	0.232	(C) BRAF Class 3
PAX8-AS1	2q14.1	0	0	0	0	1	0.13	0.0635	0.232	(C) BRAF Class 3
PCMT1	6q25.1	0	0	0	0	1	0.13	0.0635	0.232	(C) BRAF Class 3
PDE4D	5q11.2-q12.1	0	0	0	0	1	0.13	0.0635	0.232	(C) BRAF Class 3
PTTG1IP	21q22.3	0	0	0	0	1	0.13	0.0635	0.232	(C) BRAF Class 3
RAB11FIP4	17q11.2	0	0	0	0	1	0.13	0.0635	0.232	(C) BRAF Class 3
RLF	1p34.2	0	0	0	0	1	0.13	0.0635	0.232	(C) BRAF Class 3
SDHAP3	5p15.33	0	0	0	0	1	0.13	0.0635	0.232	(C) BRAF Class 3
SEPTIN14	7p11.2	0	0	0	0	1	0.13	0.0635	0.232	(C) BRAF Class 3
SNTG1	8q11.21	0	0	0	0	1	0.13	0.0635	0.232	(C) BRAF Class 3
TANC2	17q23.2-q23.3	0	0	0	0	1	0.13	0.0635	0.232	(C) BRAF Class 3
TMIE	3p21.31	0	0	0	0	1	0.13	0.0635	0.232	(C) BRAF Class 3
TRAJ22	14q11.2	0	0	0	0	1	0.13	0.0635	0.232	(C) BRAF Class 3
TTF1	9q34.13	0	0	0	0	1	0.13	0.0635	0.232	(C) BRAF Class 3
TTF2	1p13.1	0	0	0	0	1	0.13	0.0635	0.232	(C) BRAF Class 3
UAP1L1	9q34.3	0	0	0	0	1	0.13	0.0635	0.232	(C) BRAF Class 3
ZFP30	19q13.12	0	0	0	0	1	0.13	0.0635	0.232	(C) BRAF Class 3
ZNF135	19q13.43	0	0	0	0	1	0.13	0.0635	0.232	(C) BRAF Class 3
ZNF284	19q13.31	0	0	0	0	1	0.13	0.0635	0.232	(C) BRAF Class 3
MTAP	9p21.3	39	6.27	12	7.95	19	11.66	0.0648	0.232	(C) BRAF Class 3
ADGRV1	5q14.3	0	0	1	0.13	0	0	0.0652	0.232	(B) BRAF Class 2
ALG10	12p11.1	0	0	1	0.13	0	0	0.0652	0.232	(B) BRAF Class 2
C5ORF22	5p13.3	0	0	1	0.13	0	0	0.0652	0.232	(B) BRAF Class 2
CALB1	8q21.3	0	0	1	0.13	0	0	0.0652	0.232	(B) BRAF Class 2
CAMKMT	2p21	0	0	1	0.13	0	0	0.0652	0.232	(B) BRAF Class 2
CRLF3	17q11.2	0	0	1	0.13	0	0	0.0652	0.232	(B) BRAF Class 2
FAM124B	2q36.2	0	0	1	0.13	0	0	0.0652	0.232	(B) BRAF Class 2
HEXIM2	17q21.31	0	0	1	0.13	0	0	0.0652	0.232	(B) BRAF Class 2
IGHD2-2	14q32.33	0	0	1	0.13	0	0	0.0652	0.232	(B) BRAF Class 2
IRX3	16q12.2	0	0	1	0.13	0	0	0.0652	0.232	(B) BRAF Class 2
KCNAB1	3q25.31	0	0	1	0.13	0	0	0.0652	0.232	(B) BRAF Class 2
KCNJ1	11q24.3	0	0	1	0.13	0	0	0.0652	0.232	(B) BRAF Class 2
KYNU	2q22.2	0	0	1	0.13	0	0	0.0652	0.232	(B) BRAF Class 2
LAMC3	9q34.12	0	0	1	0.13	0	0	0.0652	0.232	(B) BRAF Class 2
LGALS17A	19q13.2	0	0	1	0.13	0	0	0.0652	0.232	(B) BRAF Class 2
LILRB1	19q13.42	0	0	1	0.13	0	0	0.0652	0.232	(B) BRAF Class 2
LINC00484	9q22.2	0	0	1	0.13	0	0	0.0652	0.232	(B) BRAF Class 2
LINC02544	6q27	0	0	1	0.13	0	0	0.0652	0.232	(B) BRAF Class 2
MTMR3	22q12.2	0	0	1	0.13	0	0	0.0652	0.232	(B) BRAF Class 2
NBPF1	1p36.13	0	0	1	0.13	0	0	0.0652	0.232	(B) BRAF Class 2
NUFIP1	13q14.12	0	0	1	0.13	0	0	0.0652	0.232	(B) BRAF Class 2
PAXIP1-AS2	7q36.2	0	0	1	0.13	0	0	0.0652	0.232	(B) BRAF Class 2
PEX5	12p13.31	0	0	1	0.13	0	0	0.0652	0.232	(B) BRAF Class 2
PRAG1	8p23.1	0	0	1	0.13	0	0	0.0652	0.232	(B) BRAF Class 2
PXMP2	12q24.33	0	0	1	0.13	0	0	0.0652	0.232	(B) BRAF Class 2
RERE	1p36.23	0	0	1	0.13	0	0	0.0652	0.232	(B) BRAF Class 2
ROCK1	18q11.1	0	0	1	0.13	0	0	0.0652	0.232	(B) BRAF Class 2
RUNX3	1p36.11	0	0	1	0.13	0	0	0.0652	0.232	(B) BRAF Class 2
SBF1P1	8q12.1	0	0	1	0.13	0	0	0.0652	0.232	(B) BRAF Class 2
SEC24B-AS1	4q25	0	0	1	0.13	0	0	0.0652	0.232	(B) BRAF Class 2
SELENOI	2p23.3	0	0	1	0.13	0	0	0.0652	0.232	(B) BRAF Class 2
ST7	7q31.2	0	0	1	0.13	0	0	0.0652	0.232	(B) BRAF Class 2
TECRL	4q13.1	0	0	1	0.13	0	0	0.0652	0.232	(B) BRAF Class 2
TMEM132C	12q24.32-q24.33	0	0	1	0.13	0	0	0.0652	0.232	(B) BRAF Class 2
TTC28	22q12.1	0	0	1	0.13	0	0	0.0652	0.232	(B) BRAF Class 2
VPREB1	22q11.22	0	0	1	0.13	0	0	0.0652	0.232	(B) BRAF Class 2
VRK2	2p16.1	0	0	1	0.13	0	0	0.0652	0.232	(B) BRAF Class 2
CNOT3	19q13.42	2	1.18	2	6.9	0	0	0.0653	0.232	(B) BRAF Class 2
IDH1	2q34	80	2.39	26	3.47	12	1.62	0.0655	0.232	(B) BRAF Class 2
CRKL	22q11.21	18	0.73	7	1.27	10	1.73	0.0661	0.233	(C) BRAF Class 3
CREB1	2q33.3	0	0	1	2.27	1	1.92	0.0667	0.235	(B) BRAF Class 2
RSPO3	6q22.33	20	2.57	9	5.45	3	1.59	0.0672	0.236	(B) BRAF Class 2
EED	11q14.2	14	0.88	3	0.83	8	2.25	0.0678	0.237	(C) BRAF Class 3
INSIG1	7q36.3	0	0	0	0	1	1.72	0.068	0.237	(C) BRAF Class 3
PAX7	1p36.13	15	2.65	2	2.44	7	7	0.0682	0.237	(C) BRAF Class 3
RB1	13q14.2	104	3.23	27	4.03	35	4.96	0.0683	0.237	(C) BRAF Class 3
SMARCA2	9p24.3	2	1.2	2	7.14	2	6.67	0.0688	0.237	(B) BRAF Class 2
CDH4	20q13.33	34	5.84	7	5.34	16	10.96	0.0689	0.237	(C) BRAF Class 3
NEIL3	4q34.3	23	3.95	0	0	5	3.42	0.0703	0.241	(A) BRAF Class 1 v12
ZNF708	19p12	3	0.85	3	4.41	2	2.9	0.0705	0.241	(B) BRAF Class 2
RIT1	1q22	26	1.33	3	0.68	11	2.44	0.0705	0.241	(C) BRAF Class 3
MAGI2	7q21.11	38	7.69	11	15.07	11	12.09	0.0707	0.241	(B) BRAF Class 2
BAP1	3p21.1	62	2.44	22	3.9	11	1.88	0.0717	0.243	(B) BRAF Class 2
PDGFRB	5q32	92	3.62	32	5.68	26	4.44	0.0718	0.243	(B) BRAF Class 2
AKT1	14q32.33	109	3.26	17	2.27	14	1.89	0.0723	0.244	(A) BRAF Class 1 v12
RAD54B	8q22.1	17	2.92	9	6.87	4	2.74	0.0727	0.245	(B) BRAF Class 2
SOX10	22q13.1	13	1.92	6	5.56	4	2.92	0.0744	0.249	(B) BRAF Class 2
TLR4	9q33.1	13	3.08	3	4	8	8.08	0.0747	0.249	(C) BRAF Class 3
LATS1	6q25.1	24	2.03	12	4.41	7	2.73	0.0748	0.249	(B) BRAF Class 2
IL7R	5p13.2	98	4.67	22	4.68	35	7.13	0.0748	0.249	(C) BRAF Class 3
MSH6	2p16.3	140	5.44	22	3.88	21	3.55	0.0749	0.249	(A) BRAF Class 1 v12
PTP4A1	6q12	1	0.19	2	1.44	0	0	0.0752	0.249	(B) BRAF Class 2
STAT6	12q13.3	17	1.51	8	3.4	8	3.07	0.0773	0.255	(B) BRAF Class 2
ELF3	1q32.1	10	1.51	7	4.32	4	2.52	0.0789	0.259	(B) BRAF Class 2
H3F3C	12p11.21	9	0.76	3	1.1	6	2.34	0.0791	0.259	(C) BRAF Class 3
EP400	12q24.33	5	4.17	0	0	3	14.29	0.0793	0.259	(C) BRAF Class 3
CTCF	16q22.1	51	2.4	9	1.85	20	3.94	0.0798	0.26	(C) BRAF Class 3
PML	15q24.1	28	4.05	5	3.29	1	0.59	0.0801	0.261	(A) BRAF Class 1 v12
RUNX1	21q22.12	68	2.73	21	3.85	25	4.35	0.0804	0.261	(C) BRAF Class 3
TEX12	11q23.1	0	0	0	0	1	1.08	0.0813	0.263	(C) BRAF Class 3
FGF14	13q33.1	13	1.84	5	4	7	4.55	0.0817	0.263	(C) BRAF Class 3
PPM1D	17q23.2	45	2.48	9	2.22	18	4.38	0.0818	0.263	(C) BRAF Class 3
AFF1	4q21.3-q22.1	2	1.64	0	0	2	9.09	0.0832	0.267	(C) BRAF Class 3
PTPRK	6q22.33	19	12.18	7	28	3	10	0.0836	0.268	(B) BRAF Class 2
SLIT2	4p15.31	52	8.28	12	12.5	17	14.05	0.0838	0.268	(C) BRAF Class 3
TRIM28	19q13.43	0	0	0	0	1	5	0.0845	0.269	(C) BRAF Class 3
PIK3C2G	12p12.3	81	6.15	22	6.98	30	9.68	0.0854	0.271	(C) BRAF Class 3
XRCC1	19q13.31	11	1.71	2	1.41	7	4.4	0.0869	0.274	(C) BRAF Class 3
ATP1B2	17p13.1	0	0	1	10	0	0	0.087	0.274	(B) BRAF Class 2
CDH12	5p14.3	0	0	1	10	0	0	0.087	0.274	(B) BRAF Class 2
SRY	Yp11.2	0	0	0	0	1	0.66	0.0872	0.274	(C) BRAF Class 3
SMC3	10q25.2	27	1.85	8	2.87	12	3.79	0.0881	0.275	(C) BRAF Class 3
XRCC4	5q14.2	10	1.72	3	2.29	7	4.79	0.0881	0.275	(C) BRAF Class 3
VEGFA	6p21.1	21	1.04	6	1.3	11	2.3	0.0886	0.276	(C) BRAF Class 3
NSD3	8p11.23	30	2.67	14	4.88	13	4.44	0.0921	0.285	(B) BRAF Class 2
CD70	19p13.3	0	0	0	0	1	3.23	0.0921	0.285	(C) BRAF Class 3
NR0B1	Xp21.2	11	1.89	2	1.53	7	4.79	0.0922	0.285	(C) BRAF Class 3
PARP3	3p21.2	0	0	1	2.27	0	0	0.0932	0.287	(B) BRAF Class 2
XPC	3p25.1	22	2.15	5	2.29	11	4.6	0.0943	0.29	(C) BRAF Class 3
NPRL3	16p13.3	1	0.38	1	2.08	2	3.45	0.0961	0.294	(C) BRAF Class 3
ADGRB3	6q12-q13	3	5.56	0	0	2	25	0.097	0.296	(C) BRAF Class 3
NKX3-1	8p21.2	17	0.98	9	2.24	4	1	0.098	0.299	(B) BRAF Class 2
EPHA5	4q13.1-q13.2	90	4.83	30	7.37	25	6.04	0.0987	0.3	(B) BRAF Class 2
PRKDC	8q11.21	169	10.73	41	13.53	50	14.2	0.102	0.308	(C) BRAF Class 3
KRIT1	7q21.2	1	1.09	0	0	1	10	0.102	0.308	(C) BRAF Class 3
BCL11B	14q32.2	31	4.46	13	8.44	7	4.09	0.102	0.308	(B) BRAF Class 2
FGF19	11q13.3	24	1.46	11	2.99	5	1.35	0.103	0.31	(B) BRAF Class 2
CUX1	7q22.1	117	8.21	17	6.27	34	11.07	0.104	0.313	(C) BRAF Class 3
MAP3K4	6q26	30	9.01	1	2.5	1	2.08	0.105	0.315	(A) BRAF Class 1 v12
AURKA	20q13.2	26	1.06	12	2.17	8	1.39	0.106	0.317	(B) BRAF Class 2
PIK3R1	5q13.1	67	2.6	17	2.99	25	4.22	0.107	0.317	(C) BRAF Class 3
NTRK1	1q23.1	100	3.85	31	5.36	32	5.35	0.107	0.317	(B) BRAF Class 2
TOP2A	17q21.2	32	5.1	1	1.04	3	2.48	0.108	0.32	(A) BRAF Class 1 v12
SESN3	11q21	8	1.51	1	0.72	5	3.88	0.11	0.324	(C) BRAF Class 3
PIK3C2B	1q32.1	94	6.5	16	5.5	31	9.37	0.11	0.324	(C) BRAF Class 3
ZNRF3	22q12.1	41	5.87	3	1.9	8	4.47	0.11	0.325	(A) BRAF Class 1 v12
CHEK2	22q12.1	60	2.36	7	1.24	18	3.07	0.111	0.325	(C) BRAF Class 3
MAP2K2	19p13.3	32	1.45	12	2.2	14	2.68	0.113	0.33	(C) BRAF Class 3
IFNGR1	6q23.3	19	1.61	3	1.1	0	0	0.113	0.33	(A) BRAF Class 1 v12
EXO1	1q43	14	2.41	6	4.58	8	5.48	0.113	0.33	(C) BRAF Class 3
KMT2C	7q36.1	184	12.62	28	8.54	40	12.54	0.114	0.33	(A) BRAF Class 1 v12
SUZ12	17q11.2	33	1.47	10	2	14	2.78	0.117	0.34	(C) BRAF Class 3
FLI1	11q24.3	7	1.64	3	5.26	3	4.35	0.118	0.343	(B) BRAF Class 2
MCM8	20p12.3	14	2.41	7	5.34	7	4.79	0.12	0.346	(B) BRAF Class 2
NEGR1	1p31.1	28	2.07	7	2.33	12	4.1	0.121	0.348	(C) BRAF Class 3
NT5C2	10q24.32-q24.33	11	1.33	6	3.19	6	2.86	0.122	0.351	(B) BRAF Class 2
CDH1	16q22.1	72	2.3	11	1.67	23	3.31	0.124	0.355	(C) BRAF Class 3
HABP2	10q25.3	16	2.75	1	0.76	7	4.79	0.126	0.359	(C) BRAF Class 3
SOX2	3q26.33	33	1.34	3	0.54	11	1.91	0.126	0.359	(C) BRAF Class 3
SYK	9q22.2	44	2.32	14	3.3	17	3.94	0.126	0.359	(C) BRAF Class 3
CDH23	10q22.1	3	6.25	0	0	2	25	0.127	0.361	(C) BRAF Class 3
CD79B	17q23.3	15	0.61	8	1.45	5	0.87	0.128	0.362	(B) BRAF Class 2
FANCD2	3p25.3	59	3.85	14	4.78	21	6.31	0.129	0.363	(C) BRAF Class 3
RICTOR	5p13.1	74	3.36	24	4.83	25	4.84	0.129	0.363	(C) BRAF Class 3
LYN	8q12.1	27	2.62	6	2.64	12	5.06	0.13	0.366	(C) BRAF Class 3
ETS1	11q24.3	7	1.24	2	2.47	4	4	0.133	0.372	(C) BRAF Class 3
FRK	6q22.1	1	1.09	1	6.67	1	10	0.134	0.372	(C) BRAF Class 3
EGLN1	1q42.2	5	0.86	3	2.29	0	0	0.134	0.372	(B) BRAF Class 2
LRP1B	2q22.1-q22.2	146	21.35	25	23.15	40	29.2	0.134	0.372	(C) BRAF Class 3
MBD4	3q21.3	15	2.58	0	0	2	1.37	0.135	0.376	(A) BRAF Class 1 v12
NR4A3	9q31.1	2	1.25	2	7.14	1	4.17	0.137	0.379	(B) BRAF Class 2
MST1	3p21.31	9	0.81	0	0	0	0	0.137	0.379	(A) BRAF Class 1 v12
HFE	6p22.2	6	1.03	4	3.05	1	0.68	0.139	0.382	(B) BRAF Class 2
PRKCZ	1p36.33	5	1.42	3	4.41	3	4.35	0.139	0.382	(B) BRAF Class 2
MYCL	1p34.2	33	1.3	10	1.77	14	2.39	0.14	0.384	(C) BRAF Class 3
KLHL6	3q27.1	21	2.93	0	0	5	3.21	0.141	0.385	(C) BRAF Class 3
TFRC	3q29	7	2.07	3	7.14	1	2.04	0.142	0.387	(B) BRAF Class 2
PRAME	22q11.22	4	1.13	3	4.41	2	2.9	0.142	0.387	(B) BRAF Class 2
JAK1	1p31.3	79	3.52	19	3.45	28	5.29	0.143	0.387	(C) BRAF Class 3
MLH1	3p22.2	52	1.62	17	2.54	17	2.42	0.143	0.387	(B) BRAF Class 2
RAD50	5q31.1	94	4.31	14	2.92	14	2.8	0.144	0.39	(A) BRAF Class 1 v12
WWTR1	3q25.1	3	0.5	2	1.3	3	2.14	0.146	0.394	(C) BRAF Class 3
PTPN14	1q32.3-q41	17	2.92	2	1.53	8	5.48	0.147	0.395	(C) BRAF Class 3
TNFRSF14	1p36.32	17	1.08	8	2.25	3	0.83	0.15	0.402	(B) BRAF Class 2
TSC2	16p13.3	133	5.23	28	4.96	42	7.16	0.152	0.407	(C) BRAF Class 3
KAT6A	8p11.21	68	5.43	18	7.53	23	8.07	0.153	0.409	(C) BRAF Class 3
NIPBL	5p13.2	6	3.64	3	11.11	3	9.38	0.154	0.409	(B) BRAF Class 2
SLC25A13	7q21.3	9	1.55	5	3.82	5	3.42	0.154	0.409	(B) BRAF Class 2
HGF	7q21.11	61	3.9	20	5.59	21	5.8	0.154	0.409	(C) BRAF Class 3
TOP1	20q12	27	1.68	5	1.43	11	3.13	0.155	0.41	(C) BRAF Class 3
GALNT12	9q22.33	12	1.63	6	3.64	2	1.08	0.156	0.41	(B) BRAF Class 2
DHX15	4p15.2	14	4.2	0	0	4	8.33	0.156	0.41	(C) BRAF Class 3
CDK12	17q12	71	3.21	24	4.83	22	4.26	0.156	0.41	(B) BRAF Class 2
ANKRD11	16q24.3	88	7.9	12	4.72	14	5.96	0.156	0.41	(A) BRAF Class 1 v12
MAPKAP1	9q33.3	5	0.94	0	0	3	2.33	0.157	0.412	(C) BRAF Class 3
ROBO1	3p12.3	7	4.4	2	7.69	4	13.33	0.158	0.413	(C) BRAF Class 3
FGF12	3q28-q29	0	0	0	0	1	1.85	0.159	0.413	(C) BRAF Class 3
TIPARP	3q25.31	0	0	0	0	1	1.85	0.159	0.413	(C) BRAF Class 3
CEBPA	19q13.11	27	1.13	8	1.49	12	2.15	0.159	0.413	(C) BRAF Class 3
APOBEC3G	22q13.1	1	1.16	1	8.33	0	0	0.16	0.414	(B) BRAF Class 2
INPP4B	4q31.21	32	2.08	11	3.12	13	3.66	0.16	0.414	(C) BRAF Class 3
BCL6	3q27.3	57	2.32	10	1.81	20	3.47	0.16	0.414	(C) BRAF Class 3
TRAF3	14q32.32	13	1.61	6	3.47	2	1.01	0.163	0.419	(B) BRAF Class 2
KLLN	10q23.31	14	2.41	0	0	2	1.37	0.164	0.421	(A) BRAF Class 1 v12
TBX3	12q24.21	69	4.51	23	6.57	22	6.23	0.165	0.424	(B) BRAF Class 2
TENT5C	1p12	37	1.51	8	1.45	15	2.6	0.166	0.424	(C) BRAF Class 3
PPARG	3p25.2	39	2.2	15	3.86	11	2.66	0.166	0.424	(B) BRAF Class 2
ALK	2p23.2-p23.1	181	5.42	38	5.07	52	7.06	0.17	0.432	(C) BRAF Class 3
IKZF2	2q34	4	1.82	1	2.7	3	6.82	0.17	0.432	(C) BRAF Class 3
HIST3H3	1q42.13	8	0.72	5	1.97	2	0.85	0.173	0.437	(B) BRAF Class 2
ID3	1p36.12	8	0.35	2	0.39	5	0.96	0.173	0.437	(C) BRAF Class 3
PRPF40B	12q13.12	10	2.31	5	6.02	2	2.47	0.173	0.437	(B) BRAF Class 2
DDR1	6p21.33	3	1.46	3	5.66	1	1.75	0.175	0.441	(B) BRAF Class 2
GAB2	11q14.1	3	1.81	0	0	2	6.67	0.176	0.441	(C) BRAF Class 3
SERPINA1	14q32.13	15	2.58	0	0	3	2.05	0.177	0.444	(A) BRAF Class 1 v12
BABAM1	19p13.11	14	1.28	0	0	3	1.09	0.178	0.445	(A) BRAF Class 1 v12
USP28	11q23.2	20	3.44	9	6.87	5	3.42	0.178	0.445	(B) BRAF Class 2
RPL10	Xq28	1	1.05	1	7.14	0	0	0.181	0.451	(B) BRAF Class 2
COP1	1q25.1-q25.2	34	2.25	10	2.96	13	4	0.182	0.452	(C) BRAF Class 3
ERG	21q22.2	63	2.96	12	2.46	22	4.33	0.187	0.462	(C) BRAF Class 3
CRTC2	1q21.3	7	1.98	3	4.41	0	0	0.187	0.462	(B) BRAF Class 2
UIMC1	5q35.2	14	2.32	1	0.72	6	3.97	0.188	0.464	(C) BRAF Class 3
INSRR	1q23.1	6	0.18	0	0	3	0.4	0.192	0.472	(C) BRAF Class 3
DOCK8	9p24.3	48	8.25	11	8.4	19	13.01	0.192	0.472	(C) BRAF Class 3
TEK	9p21.2	33	4.63	15	7.89	9	4.84	0.192	0.472	(B) BRAF Class 2
MLH3	14q24.3	28	3.48	9	5.26	12	6.09	0.193	0.473	(C) BRAF Class 3
GBA	1q22	6	1.03	4	3.05	3	2.05	0.194	0.474	(B) BRAF Class 2
INHBA	7p14.1	43	2.95	14	4.35	15	4.63	0.196	0.477	(C) BRAF Class 3
NUF2	1q23.3	10	1.89	1	0.72	0	0	0.196	0.477	(A) BRAF Class 1 v12
MALT1	18q21.32	17	1.4	7	2.55	7	2.71	0.197	0.477	(C) BRAF Class 3
SH2B3	12q24.12	61	2.6	8	1.54	9	1.66	0.197	0.477	(A) BRAF Class 1 v12
DNMT3B	20q11.21	34	2.87	9	3.31	13	5.08	0.199	0.481	(C) BRAF Class 3
FGF23	12p13.32	9	1.27	4	3.2	4	2.6	0.206	0.497	(B) BRAF Class 2
COL7A1	3p21.31	94	16.15	26	19.85	32	21.92	0.206	0.497	(C) BRAF Class 3
PPP6C	9q33.3	42	3.3	5	1.77	5	1.83	0.207	0.498	(A) BRAF Class 1 v12
PALB2	16p12.2	87	3.43	25	4.44	28	4.78	0.207	0.498	(C) BRAF Class 3
TYK2	19p13.2	6	2.41	3	6.82	3	5.77	0.21	0.502	(B) BRAF Class 2
ELANE	19p13.3	14	2.15	0	0	3	1.92	0.21	0.502	(A) BRAF Class 1 v12
BRCA2	13q13.1	204	8.03	36	6.38	54	9.17	0.212	0.505	(C) BRAF Class 3
STAT4	2q32.2-q32.3	23	3.39	4	3.7	9	6.57	0.214	0.51	(C) BRAF Class 3
TP53BP1	15q15.3	58	4.91	11	3.78	21	6.84	0.215	0.51	(C) BRAF Class 3
HOXB13	17q21.32	18	0.94	7	1.62	8	1.78	0.217	0.513	(C) BRAF Class 3
ARHGAP35	19q13.32	31	4.27	7	4.46	13	7.39	0.217	0.514	(C) BRAF Class 3
SDHA	5p15.33	71	3.11	10	1.93	20	3.71	0.219	0.518	(C) BRAF Class 3
HIST1H3I	6p22.1	6	0.54	4	1.57	2	0.85	0.22	0.518	(B) BRAF Class 2
RHOT1	17q11.2	6	1.03	1	0.76	4	2.74	0.221	0.519	(C) BRAF Class 3
KMT2A	11q23.3	214	8.6	54	9.66	63	10.81	0.221	0.519	(C) BRAF Class 3
BCL2L12	19q13.33	11	1.13	4	1.93	6	2.55	0.225	0.525	(C) BRAF Class 3
CTNNA1	5q31.2	27	2.12	10	3.94	7	2.33	0.225	0.525	(B) BRAF Class 2
MEF2B	19p13.11	28	1.14	10	1.81	11	1.91	0.226	0.526	(C) BRAF Class 3
GSK3B	3q13.33	17	1.09	8	2.23	5	1.38	0.226	0.526	(B) BRAF Class 2
PTK2	8q24.3	8	2.27	0	0	3	4.35	0.228	0.531	(C) BRAF Class 3
ALOX12B	17p13.1	37	2.24	8	2.1	14	3.69	0.229	0.531	(C) BRAF Class 3
MUTYH	1p34.1	45	1.83	11	1.99	17	2.95	0.23	0.531	(C) BRAF Class 3
PRSS8	16p11.2	7	1.36	0	0	3	3.06	0.231	0.531	(C) BRAF Class 3
EML4	2p21	13	3	4	6.78	4	5.71	0.231	0.531	(B) BRAF Class 2
SNCAIP	5q23.2	44	6.69	9	7.96	15	10.87	0.231	0.531	(C) BRAF Class 3
FGF3	11q13.3	27	1.64	8	2.17	11	2.96	0.231	0.531	(C) BRAF Class 3
MGMT	10q26.3	1	0.64	1	4	0	0	0.232	0.531	(B) BRAF Class 2
RACK1	5q35.3	4	1.52	2	4.17	0	0	0.233	0.532	(B) BRAF Class 2
CRTC1	19p13.11	37	3.65	7	3.24	14	5.91	0.233	0.532	(C) BRAF Class 3
TSHZ3	19q12	2	2.33	1	8.33	2	10	0.234	0.532	(C) BRAF Class 3
NOTCH4	6p21.32	91	6.42	21	6.58	29	9.06	0.234	0.532	(C) BRAF Class 3
SHOC2	10q25.2	8	1.51	0	0	3	2.33	0.239	0.543	(C) BRAF Class 3
BRD4	19p13.12	126	5.23	19	3.49	28	4.97	0.24	0.543	(A) BRAF Class 1 v12
HIST1H3H	6p22.1	4	0.36	3	1.18	1	0.43	0.241	0.544	(B) BRAF Class 2
PRKAR1A	17q24.2	23	0.93	7	1.27	10	1.73	0.241	0.544	(C) BRAF Class 3
TET3	2p13.1	1	2.94	1	20	0	0	0.242	0.544	(B) BRAF Class 2
NECTIN4	1q23.3	8	1.37	3	2.29	5	3.42	0.242	0.544	(C) BRAF Class 3
SDHD	11q23.1	9	0.37	5	0.91	3	0.53	0.244	0.548	(B) BRAF Class 2
AMER1	Xq11.2	64	4.08	17	4.75	22	6.08	0.246	0.548	(C) BRAF Class 3
FGF4	11q13.3	29	1.85	10	2.79	4	1.1	0.247	0.548	(B) BRAF Class 2
HSP90AB1	6p21.1	1	0.4	1	2.38	0	0	0.247	0.548	(B) BRAF Class 2
MT-ND5	-	12	0.36	0	0	3	0.4	0.247	0.548	(C) BRAF Class 3
GLI2	2q14.2	79	7.55	24	10.91	21	8.57	0.248	0.548	(B) BRAF Class 2
RYBP	3p13	8	0.68	4	1.47	4	1.56	0.248	0.548	(C) BRAF Class 3
PC	11q13.2	1	1.16	1	7.14	0	0	0.249	0.548	(B) BRAF Class 2
PCLO	7q21.11	1	1.16	1	7.14	0	0	0.249	0.548	(B) BRAF Class 2
PDCD11	10q24.33	1	1.16	1	7.14	0	0	0.249	0.548	(B) BRAF Class 2
CUL3	2q36.2	20	1.3	3	0.85	8	2.26	0.249	0.548	(C) BRAF Class 3
ESPL1	12q13.13	1	1.16	1	8.33	1	5	0.25	0.549	(B) BRAF Class 2
TLR2	4q31.3	1	2.08	1	12.5	0	0	0.252	0.55	(B) BRAF Class 2
SDHAF2	11q12.2	10	0.45	1	0.2	0	0	0.253	0.55	(A) BRAF Class 1 v12
U2AF1	21q22.3	38	1.51	14	2.5	11	1.89	0.253	0.55	(B) BRAF Class 2
PNKP	19q13.33	12	2.06	0	0	3	2.05	0.253	0.55	(A) BRAF Class 1 v12
ACVR2A	2q22.3-q23.1	1	0.85	1	5.26	1	4.76	0.253	0.55	(B) BRAF Class 2
TGM7	15q15.2-q15.3	1	0.85	1	5.26	1	4.76	0.253	0.55	(B) BRAF Class 2
PPP2R2A	8p21.2	8	2.2	0	0	0	0	0.255	0.553	(A) BRAF Class 1 v12
LAMP1	13q34	6	1.4	2	3.51	0	0	0.256	0.555	(B) BRAF Class 2
POLQ	3q13.33	53	8.2	15	10.64	20	12.05	0.257	0.555	(C) BRAF Class 3
IRS1	2q36.3	63	5.33	8	2.94	13	5.08	0.258	0.556	(A) BRAF Class 1 v12
PPP4R2	3p13	8	1.51	5	3.6	2	1.55	0.26	0.56	(B) BRAF Class 2
ECT2L	6q24.1	1	1	0	0	1	5.88	0.261	0.561	(C) BRAF Class 3
IL6ST	5q11.2	1	0.5	0	0	1	2.94	0.262	0.562	(C) BRAF Class 3
GRM8	7q31.33	4	3.42	0	0	2	9.52	0.264	0.564	(C) BRAF Class 3
SMARCAL1	2q35	2	2.17	0	0	1	10	0.264	0.564	(C) BRAF Class 3
CCNE1	19q12	44	1.73	15	2.66	14	2.39	0.265	0.566	(B) BRAF Class 2
NIN	14q22.1	3	2.46	2	9.52	1	4.55	0.271	0.577	(B) BRAF Class 2
CALR	19p13.13	26	1.34	5	1.12	2	0.44	0.273	0.579	(A) BRAF Class 1 v12
SSX2	Xp11.22	1	1.75	0	0	1	10	0.274	0.579	(C) BRAF Class 3
RPS6KB1	17q23.1	5	1.5	0	0	2	4.17	0.274	0.579	(C) BRAF Class 3
PARP1	1q42.12	44	3.11	13	3.92	6	1.81	0.275	0.579	(B) BRAF Class 2
CIC	19q13.2	148	6.95	25	5.13	38	7.48	0.275	0.579	(C) BRAF Class 3
GLMN	1p22.1	1	1.09	1	6.67	0	0	0.275	0.58	(B) BRAF Class 2
PREX2	8q13.2	139	11.96	28	11.72	40	15.5	0.276	0.58	(C) BRAF Class 3
SF1	11q13.1	13	3.01	0	0	2	2.47	0.277	0.58	(A) BRAF Class 1 v12
PNRC1	6q15	17	1.05	1	0.27	2	0.55	0.277	0.58	(A) BRAF Class 1 v12
MAP3K9	14q24.2	9	4.89	0	0	3	8.33	0.278	0.582	(C) BRAF Class 3
TET1	10q21.3	117	6.34	29	6.89	36	8.49	0.28	0.584	(C) BRAF Class 3
TOPBP1	3q22.1	23	3.89	9	6.77	5	3.38	0.281	0.586	(B) BRAF Class 2
PIK3CD	1p36.22	38	2.97	5	1.73	11	3.97	0.282	0.588	(C) BRAF Class 3
HELQ	4q21.23	17	2.92	6	4.58	2	1.37	0.284	0.589	(B) BRAF Class 2
NSD2	4p16.3	44	3.23	16	4.86	15	4.35	0.287	0.594	(B) BRAF Class 2
MAPK3	16p11.2	20	1.79	5	1.96	1	0.43	0.287	0.594	(B) BRAF Class 2
ESR2	14q23.2-q23.3	1	0.39	1	2	0	0	0.288	0.595	(B) BRAF Class 2
DEPDC5	22q12.2-q12.3	13	4.94	4	8.33	1	1.72	0.289	0.596	(B) BRAF Class 2
TRAF2	9q34.3	25	2.12	2	0.75	6	2.41	0.291	0.599	(C) BRAF Class 3
EXT1	8q24.11	21	2.05	5	2.29	9	3.77	0.292	0.6	(C) BRAF Class 3
HLF	17q22	1	0.82	0	0	1	4.55	0.293	0.6	(C) BRAF Class 3
EPAS1	2p21	12	2.26	3	2.16	6	4.65	0.293	0.6	(C) BRAF Class 3
TAF1L	9p21.1	1	0.85	0	0	1	4.76	0.295	0.603	(C) BRAF Class 3
RBM15	1p13.3	1	0.86	1	4.76	1	4.55	0.296	0.604	(B) BRAF Class 2
DKC1	Xq28	8	1.37	0	0	3	2.04	0.297	0.604	(C) BRAF Class 3
PTEN	10q23.31	350	10.46	61	8.7	69	9.36	0.3	0.609	(A) BRAF Class 1 v12
PDGFB	22q13.1	1	0.39	1	2.27	1	1.92	0.301	0.611	(B) BRAF Class 2
PLAG1	8q12.1	1	0.38	1	2.17	1	1.85	0.305	0.617	(B) BRAF Class 2
AXIN1	16p13.3	56	3.68	8	2.29	9	2.59	0.305	0.617	(A) BRAF Class 1 v12
TSC1	9q34.13	81	3.18	21	3.72	26	4.43	0.309	0.625	(C) BRAF Class 3
RAD54L	1p34.1	19	1.44	2	0.63	2	0.65	0.312	0.626	(A) BRAF Class 1 v12
AFDN	6q27	1	0.86	0	0	1	4.55	0.312	0.626	(C) BRAF Class 3
ASXL2	2p23.3	58	4.39	17	5.74	9	3.15	0.312	0.626	(B) BRAF Class 2
UBE2T	1q32.1	4	0.69	2	1.53	0	0	0.313	0.626	(B) BRAF Class 2
ARFRP1	20q13.33	7	1	3	2.44	1	0.65	0.313	0.626	(B) BRAF Class 2
ZFHX3	16q22.2-q22.3	153	12.26	25	9.03	31	11.7	0.317	0.633	(A) BRAF Class 1 v12
PIK3CG	7q22.3	76	4.94	18	5.28	24	6.96	0.317	0.633	(C) BRAF Class 3
DMC1	22q13.1	10	1.72	0	0	2	1.37	0.318	0.633	(A) BRAF Class 1 v12
ZMYM3	Xq13.1	6	2.73	2	5.41	0	0	0.319	0.634	(B) BRAF Class 2
EME1	17q21.33	10	1.72	4	3.05	1	0.68	0.322	0.639	(B) BRAF Class 2
PTPN1	20q13.13	1	0.6	0	0	1	3.13	0.323	0.64	(C) BRAF Class 3
EIF1AX	Xp22.12	19	1.38	4	1.29	1	0.34	0.324	0.64	(A) BRAF Class 1 v12
SUFU	10q24.32	45	1.83	10	1.81	16	2.77	0.325	0.642	(C) BRAF Class 3
MST1R	3p21.31	46	3.57	15	4.95	15	5.08	0.327	0.645	(C) BRAF Class 3
PHF1	6p21.32	5	0.15	0	0	0	0	0.328	0.645	(A) BRAF Class 1 v12
CHEK1	11q24.2	27	1.22	10	2.01	9	1.74	0.328	0.645	(B) BRAF Class 2
DNMT3A	2p23.3	126	5.06	37	6.61	33	5.63	0.329	0.645	(B) BRAF Class 2
MYB	6q23.3	19	1.21	4	1.28	8	2.22	0.329	0.645	(C) BRAF Class 3
TMPRSS2	21q22.3	40	1.9	10	2.07	15	2.96	0.33	0.646	(C) BRAF Class 3
STAT5B	17q21.2	37	3.1	4	1.48	8	3.17	0.332	0.648	(C) BRAF Class 3
POLB	8p11.21	9	1.55	3	2.29	5	3.42	0.333	0.648	(C) BRAF Class 3
PTCH1	9q22.32	132	5.2	22	3.9	25	4.27	0.334	0.648	(A) BRAF Class 1 v12
PDE4DIP	1q21.2	6	4.92	0	0	0	0	0.334	0.648	(A) BRAF Class 1 v12
SLX4	16p13.3	97	6.55	22	6.96	15	4.52	0.336	0.651	(B) BRAF Class 2
KLF2	19p13.11	8	1.37	0	0	1	0.68	0.338	0.653	(A) BRAF Class 1 v12
XBP1	22q12.1|22q12	1	0.45	0	0	1	2.27	0.339	0.655	(C) BRAF Class 3
POLE	12q24.33	161	7.28	30	5.99	43	8.37	0.343	0.662	(C) BRAF Class 3
SMARCD1	12q13.12	24	1.86	2	0.67	5	1.71	0.345	0.665	(A) BRAF Class 1 v12
TDG	12q23.3	8	1.37	2	1.53	0	0	0.351	0.675	(B) BRAF Class 2
EXT2	11p11.2	18	1.76	7	3.21	4	1.67	0.352	0.675	(B) BRAF Class 2
ATF1	12q13.12	1	0.39	0	0	1	1.92	0.353	0.675	(C) BRAF Class 3
DDIT3	12q13.3	1	0.39	0	0	1	1.92	0.353	0.675	(C) BRAF Class 3
SDHB	1p36.13	10	0.41	4	0.73	1	0.18	0.357	0.681	(B) BRAF Class 2
SMAD4	18q21.2	230	7.01	41	5.99	57	7.94	0.358	0.682	(C) BRAF Class 3
MYD88	3p22.2	31	1.21	10	1.76	5	0.84	0.358	0.682	(B) BRAF Class 2
MAPK1	22q11.22	19	0.79	7	1.3	7	1.28	0.36	0.685	(B) BRAF Class 2
PAXIP1	7q36.2	25	4.3	8	6.11	10	6.85	0.369	0.699	(C) BRAF Class 3
ERCC3	2q14.3	39	1.79	12	2.47	13	2.64	0.369	0.699	(C) BRAF Class 3
FMC1-LUC7L2	7q34	1	0.03	0	0	1	0.13	0.372	0.702	(C) BRAF Class 3
MT-ND6	-	1	0.03	0	0	1	0.13	0.372	0.702	(C) BRAF Class 3
RHEB	7q36.1	11	0.52	5	1.08	3	0.63	0.375	0.707	(B) BRAF Class 2
GATA4	8p23.1	32	2.26	4	1.4	10	3.1	0.376	0.707	(C) BRAF Class 3
BCL2L11	2q13	8	0.67	0	0	2	0.78	0.378	0.707	(C) BRAF Class 3
IGF2R	6q25.3	8	2.4	1	1.59	4	4.94	0.378	0.707	(C) BRAF Class 3
HIST1H2BD	6p22.2	9	0.76	2	0.73	0	0	0.378	0.707	(A) BRAF Class 1 v12
HIST1H3D	6p22.2	8	0.72	1	0.39	0	0	0.378	0.707	(A) BRAF Class 1 v12
FOXL2	3q22.3	46	2.08	9	1.81	6	1.16	0.379	0.708	(A) BRAF Class 1 v12
NPM1	5q35.1	22	0.71	7	1.07	3	0.44	0.382	0.713	(B) BRAF Class 2
LZTR1	22q11.21|22q11.1-q11.2	25	3.89	5	5	8	6.61	0.388	0.72	(C) BRAF Class 3
PRPF8	17p13.3	14	3.24	5	6.02	2	2.47	0.388	0.72	(B) BRAF Class 2
DDX41	5q35.3	5	1.07	2	3.17	1	1.28	0.388	0.72	(B) BRAF Class 2
INSR	19p13.2	57	4.29	9	2.96	9	3.01	0.389	0.72	(A) BRAF Class 1 v12
AKT3	1q43-q44	35	1.36	10	1.76	5	0.84	0.391	0.724	(B) BRAF Class 2
INPP4A	2q11.2	23	1.94	3	1.1	7	2.73	0.394	0.729	(C) BRAF Class 3
GNA11	19p13.3	24	0.74	7	0.95	9	1.24	0.396	0.73	(C) BRAF Class 3
PDCD1	2q37.3	33	2.56	4	1.32	8	2.78	0.397	0.73	(C) BRAF Class 3
ERCC2	19q13.32	77	3.09	23	4.23	18	3.16	0.399	0.733	(B) BRAF Class 2
DCC	18q21.2	14	5.58	4	9.52	5	9.8	0.4	0.735	(C) BRAF Class 3
FKBP9	7p14.3	6	1.7	0	0	2	2.9	0.401	0.735	(C) BRAF Class 3
KLF4	9q31.2	34	1.75	11	2.52	6	1.35	0.403	0.736	(B) BRAF Class 2
STAG1	3q22.3	28	4.14	5	4.59	2	1.68	0.403	0.736	(B) BRAF Class 2
SOX9	17q24.3	109	4.54	19	3.52	29	5.17	0.405	0.738	(C) BRAF Class 3
FOXP1	3p13	35	2.31	12	3.57	8	2.37	0.405	0.738	(B) BRAF Class 2
NFKBIE	6p21.1	13	1.82	4	2.6	6	3.41	0.406	0.738	(C) BRAF Class 3
PGBD3	10q11.23	11	0.33	5	0.67	3	0.4	0.407	0.738	(B) BRAF Class 2
DIS3	13q21.33	70	2.95	21	3.9	21	3.73	0.408	0.74	(B) BRAF Class 2
TCF7L2	10q25.2-q25.3	76	3.39	13	2.65	21	4.18	0.41	0.742	(C) BRAF Class 3
RECQL4	8q24.3	121	5.62	24	5.01	34	6.91	0.411	0.742	(C) BRAF Class 3
TAL1	1p33	10	1.47	3	2	5	2.98	0.411	0.742	(C) BRAF Class 3
NAV3	12q21.2	8	5.13	3	12	2	6.67	0.412	0.742	(B) BRAF Class 2
RBL2	16q12.2	8	2.27	0	0	2	2.9	0.415	0.746	(C) BRAF Class 3
CDK8	13q12.13	36	1.69	10	2.05	13	2.56	0.415	0.746	(C) BRAF Class 3
CENPA	2p23.3	5	0.45	2	0.79	0	0	0.416	0.746	(B) BRAF Class 2
GATA3	10p14	72	2.92	17	3.07	23	3.99	0.417	0.746	(C) BRAF Class 3
AXIN2	17q24.1	83	4.28	17	3.91	13	2.92	0.418	0.747	(A) BRAF Class 1 v12
SOS1	2p22.1	38	3.1	9	3.09	14	4.59	0.42	0.75	(C) BRAF Class 3
NSD1	5q35.3	126	6.03	32	6.84	37	7.57	0.422	0.75	(C) BRAF Class 3
GREM1	15q13.3	11	0.56	5	1.12	3	0.66	0.422	0.75	(B) BRAF Class 2
GNA13	17q24.1	3	0.42	1	0.79	2	1.29	0.423	0.75	(C) BRAF Class 3
HDAC9	7p21.1	3	3.49	1	8.33	2	10	0.424	0.75	(C) BRAF Class 3
TSHZ2	20q13.2	3	3.49	1	8.33	2	10	0.424	0.75	(C) BRAF Class 3
FANCI	15q26.1	47	4.13	12	5.58	8	3.16	0.424	0.75	(B) BRAF Class 2
PIM1	6p21.2	18	0.82	7	1.39	6	1.18	0.427	0.753	(B) BRAF Class 2
ARID1B	6q25.3	171	7.2	40	7.63	48	8.82	0.43	0.758	(C) BRAF Class 3
CREBBP	16p13.3	192	7.56	39	6.93	52	8.87	0.431	0.76	(C) BRAF Class 3
RXRA	9q34.2	18	3.4	2	1.44	3	2.33	0.432	0.76	(A) BRAF Class 1 v12
PAX3	2q36.1	11	1.94	3	3.66	1	1	0.434	0.762	(B) BRAF Class 2
SH2D1A	Xq25	11	0.6	3	0.72	5	1.18	0.435	0.763	(C) BRAF Class 3
PTPRO	12p12.3|12p13-p12	1	0.86	1	3.23	0	0	0.437	0.763	(B) BRAF Class 2
RELA	11q13.1	16	2.05	1	0.61	4	2.12	0.437	0.763	(C) BRAF Class 3
JUN	1p32.1	23	1.6	3	0.9	3	0.9	0.438	0.763	(A) BRAF Class 1 v12
KCNQ1	11p15.5-p15.4	25	4.3	4	3.05	9	6.16	0.438	0.763	(C) BRAF Class 3
RNF8	6p21.2	5	0.86	0	0	2	1.37	0.439	0.763	(C) BRAF Class 3
EGFL7	9q34.3	15	1.27	1	0.37	3	1.17	0.44	0.763	(A) BRAF Class 1 v12
RAC2	22q13.1	6	1.13	0	0	1	0.78	0.44	0.763	(A) BRAF Class 1 v12
AJUBA	14q11.2	2	1.28	1	4	0	0	0.44	0.763	(B) BRAF Class 2
SHQ1	3p13	24	2.03	9	3.31	6	2.34	0.442	0.765	(B) BRAF Class 2
MTOR	1p36.22	145	5.56	37	5.89	42	6.9	0.445	0.768	(C) BRAF Class 3
EGR1	5q31.2	1	0.87	0	0	1	3.57	0.445	0.768	(C) BRAF Class 3
ACVR1B	12q13.13	10	1.52	3	2.65	4	2.9	0.446	0.768	(C) BRAF Class 3
ARID5B	10q21.2	50	3.79	10	3.38	15	5.24	0.447	0.768	(C) BRAF Class 3
TFE3	Xp11.23	30	2.64	3	1.41	8	3.23	0.45	0.772	(C) BRAF Class 3
XRCC6	22q13.2	11	1.89	2	1.53	5	3.42	0.453	0.775	(C) BRAF Class 3
GRM3	7q21.11-q21.12	58	8.81	6	5.31	11	7.97	0.453	0.775	(A) BRAF Class 1 v12
EPHB1	3q22.2	64	4.08	17	4.75	20	5.52	0.454	0.775	(C) BRAF Class 3
SRP19	5q22.2	3	0.82	0	0	0	0	0.454	0.775	(A) BRAF Class 1 v12
MTR	1q43	2	1.71	1	5.26	0	0	0.455	0.775	(B) BRAF Class 2
FAAP100	17q25.3	24	4.12	4	3.05	3	2.05	0.455	0.775	(A) BRAF Class 1 v12
PMS2	7p22.1	53	2.14	12	2.17	17	3	0.457	0.777	(C) BRAF Class 3
FAN1	15q13.3	15	2.58	6	4.58	5	3.42	0.459	0.779	(B) BRAF Class 2
BCL2L1	20q11.21	11	0.46	3	0.55	5	0.88	0.461	0.781	(C) BRAF Class 3
MGA	15q15.1	182	10.05	35	8.6	46	11.19	0.463	0.783	(C) BRAF Class 3
MAP3K7	6q15	2	0.79	1	2.33	0	0	0.463	0.783	(B) BRAF Class 2
NCOA3	20q13.12	52	3.97	10	3.47	15	5.4	0.464	0.783	(C) BRAF Class 3
TRRAP	7q22.1	1	0.45	0	0	1	1.69	0.465	0.783	(C) BRAF Class 3
KCNIP1	5q35.1	6	2.28	0	0	2	3.45	0.466	0.784	(C) BRAF Class 3
EPCAM	2p21	18	0.91	4	0.89	7	1.53	0.468	0.785	(C) BRAF Class 3
MLLT3	9p21.3	9	2.47	1	2.08	3	5.26	0.468	0.785	(C) BRAF Class 3
PCDHAC2	5q31.3	2	4.17	1	12.5	0	0	0.469	0.785	(B) BRAF Class 2
FGF5	4q21.21	10	3	0	0	2	4.17	0.472	0.788	(C) BRAF Class 3
DMD	Xp21.2-p21.1	12	3.4	4	5.88	4	5.8	0.472	0.788	(B) BRAF Class 2
FAT1	4q35.2	262	12.84	61	13.32	71	14.95	0.473	0.79	(C) BRAF Class 3
FGF2	4q28.1	3	0.9	1	2.5	0	0	0.475	0.791	(B) BRAF Class 2
FAH	15q25.1	13	2.23	1	0.76	4	2.74	0.476	0.791	(C) BRAF Class 3
CDK4	12q14.1	43	1.69	9	1.47	6	1.01	0.476	0.791	(A) BRAF Class 1 v12
ETV6	12p13.2	51	2.09	15	2.73	16	2.76	0.477	0.791	(C) BRAF Class 3
AR	Xq12	120	4.72	35	5.72	33	5.57	0.479	0.792	(B) BRAF Class 2
POLR2A	17p13.1	4	4.35	0	0	1	10	0.479	0.792	(C) BRAF Class 3
RAD52	12p13.33	24	1.28	3	0.68	4	0.88	0.481	0.795	(A) BRAF Class 1 v12
WRN	8p12	52	4.5	14	5.81	16	5.95	0.483	0.797	(C) BRAF Class 3
SLC34A2	4p15.2	28	4.12	7	4.4	4	2.27	0.484	0.797	(B) BRAF Class 2
ZBTB20	3q13.31	4	2.56	0	0	0	0	0.487	0.802	(A) BRAF Class 1 v12
ERF	19q13.2	9	1.7	4	2.88	4	3.1	0.489	0.803	(C) BRAF Class 3
TAP2	6p21.32	5	0.94	3	2.16	2	1.55	0.491	0.805	(B) BRAF Class 2
RPTOR	17q25.3	87	4.1	25	5.13	25	4.92	0.492	0.805	(B) BRAF Class 2
IKBKE	1q32.1	22	1.4	8	2.23	5	1.38	0.495	0.807	(B) BRAF Class 2
CTLA4	2q33.2	26	1.49	3	0.74	5	1.24	0.495	0.807	(A) BRAF Class 1 v12
CDK6	7q21.2	19	0.75	6	1.06	7	1.19	0.496	0.807	(C) BRAF Class 3
PTCH2	1p34.1	6	2.51	0	0	2	3.33	0.496	0.807	(C) BRAF Class 3
PMAIP1	18q21.32	6	0.51	0	0	1	0.39	0.497	0.808	(A) BRAF Class 1 v12
PDPK1	16p13.3	6	0.48	0	0	1	0.38	0.502	0.815	(A) BRAF Class 1 v12
CDC42	1p36.12	3	0.45	1	0.62	2	1.26	0.502	0.815	(C) BRAF Class 3
UBR5	8q22.3	2	1.49	0	0	1	4.17	0.506	0.817	(C) BRAF Class 3
CSF3R	1p34.3	52	2.35	15	3.01	16	3.08	0.506	0.817	(C) BRAF Class 3
HIST1H3G	6p22.2	6	0.54	3	1.18	2	0.85	0.506	0.817	(B) BRAF Class 2
FANCB	Xp22.2	20	3	2	1.33	4	2.44	0.508	0.817	(A) BRAF Class 1 v12
BCL9	1q21.2	2	1.64	0	0	1	4.55	0.508	0.817	(C) BRAF Class 3
LMO1	11p15.4	17	0.75	6	1.18	3	0.57	0.508	0.817	(B) BRAF Class 2
DYNC1I1	7q21.3	2	2.33	1	8.33	1	5	0.509	0.817	(B) BRAF Class 2
TGFBR1	9q22.33	20	1.69	6	2.21	7	2.73	0.511	0.818	(C) BRAF Class 3
BCR	22q11.23	22	3.82	2	1.96	3	2.4	0.511	0.818	(A) BRAF Class 1 v12
CSNK1A1	5q32	5	1.5	0	0	0	0	0.512	0.818	(A) BRAF Class 1 v12
FGF9	13q12.11	5	1.5	0	0	0	0	0.512	0.818	(A) BRAF Class 1 v12
MTA1	14q32.33	25	4.3	3	2.29	7	4.79	0.513	0.818	(C) BRAF Class 3
CD276	15q24.1	19	1.61	2	0.74	3	1.17	0.515	0.818	(A) BRAF Class 1 v12
CDH11	16q21	2	1.64	0	0	1	4.55	0.515	0.818	(C) BRAF Class 3
TRIM33	1p13.2	2	1.64	0	0	1	4.55	0.515	0.818	(C) BRAF Class 3
KNSTRN	15q15.1	20	2.69	4	2.31	2	1.19	0.515	0.818	(A) BRAF Class 1 v12
CAMTA1	1p36.31-p36.23	2	1.25	1	3.57	0	0	0.52	0.824	(B) BRAF Class 2
TYRO3	15q15.1	2	1.48	0	0	0	0	0.522	0.826	(A) BRAF Class 1 v12
SPEN	1p36.21-p36.13	142	9.08	26	7.26	30	8.29	0.524	0.828	(A) BRAF Class 1 v12
ETV4	17q21.31	19	1.3	3	1.01	2	0.59	0.527	0.832	(A) BRAF Class 1 v12
MSH2	2p21-p16.3	72	2.91	17	3.09	22	3.82	0.528	0.832	(C) BRAF Class 3
SLITRK6	13q31.1	12	3.67	2	3.45	5	6.41	0.529	0.832	(C) BRAF Class 3
NFKBIA	14q13.2	26	1.09	3	0.56	6	1.08	0.532	0.835	(A) BRAF Class 1 v12
NKX2-1	14q13.3	58	2.36	15	2.71	10	1.73	0.532	0.835	(B) BRAF Class 2
ZBTB2	6q25.1	3	0.61	1	1.37	0	0	0.533	0.835	(B) BRAF Class 2
ADGRA2	8p11.23	35	5.64	7	7.22	10	8.06	0.533	0.835	(C) BRAF Class 3
ID4	6p22.3	5	0.86	1	0.76	0	0	0.535	0.836	(A) BRAF Class 1 v12
TTYH1	19q13.42	2	1.28	1	4	1	3.33	0.537	0.837	(B) BRAF Class 2
RAC1	7p22.1	50	2.17	12	2.29	16	2.97	0.537	0.837	(C) BRAF Class 3
RAD51	15q15.1	19	0.86	4	0.81	2	0.39	0.539	0.84	(A) BRAF Class 1 v12
CADM2	3p12.1	8	3.04	3	6.25	2	3.45	0.541	0.841	(B) BRAF Class 2
CDK1	10q21.2	2	0.57	0	0	1	1.45	0.542	0.841	(C) BRAF Class 3
HSP90AA1	14q32.31	8	1.5	1	1.22	3	2.97	0.542	0.841	(C) BRAF Class 3
WT1	11p13	68	2.73	17	3.04	12	2.05	0.549	0.849	(B) BRAF Class 2
ENG	9q34.11	13	2.23	1	0.76	3	2.05	0.55	0.849	(A) BRAF Class 1 v12
CDKN1B	12p13.1	35	1.38	5	0.89	6	1.02	0.55	0.849	(A) BRAF Class 1 v12
KDM5C	Xp11.22	80	3.37	21	3.94	24	4.24	0.55	0.849	(C) BRAF Class 3
FUS	16p11.2	16	1.51	5	2.26	6	2.33	0.552	0.85	(C) BRAF Class 3
CARM1	19p13.2	9	1.7	1	0.72	1	0.78	0.552	0.85	(A) BRAF Class 1 v12
MAP3K2	2q14.3	3	1.92	1	4	0	0	0.556	0.852	(B) BRAF Class 2
CDK9	9q34.11	3	0.85	0	0	0	0	0.557	0.852	(A) BRAF Class 1 v12
PSMD13	11p15.5	3	0.85	0	0	0	0	0.557	0.852	(A) BRAF Class 1 v12
PHF6	Xq26.2	20	1.33	6	2.07	6	1.83	0.557	0.852	(B) BRAF Class 2
UPF1	19p13.11	15	2.83	4	2.88	6	4.65	0.557	0.852	(C) BRAF Class 3
RAD21	8q24.11	57	2.5	9	1.76	11	2.11	0.561	0.856	(A) BRAF Class 1 v12
FRS2	12q15	6	0.95	2	2.06	2	1.64	0.564	0.86	(B) BRAF Class 2
CYSLTR2	13q14.2	7	1.06	3	1.8	3	1.99	0.566	0.861	(C) BRAF Class 3
MDM4	1q32.1	29	1.14	9	1.6	9	1.54	0.566	0.861	(B) BRAF Class 2
IDH2	15q26.1	47	1.48	7	0.97	10	1.4	0.569	0.865	(A) BRAF Class 1 v12
RPL22	1p36.31	3	5.66	0	0	0	0	0.571	0.865	(A) BRAF Class 1 v12
CCND3	6p21.1	21	0.83	6	1.07	3	0.51	0.572	0.866	(B) BRAF Class 2
INHA	2q35	22	1.97	3	1.18	3	1.28	0.573	0.866	(A) BRAF Class 1 v12
FGF7	15q21.2	4	0.92	1	1.54	0	0	0.573	0.866	(B) BRAF Class 2
KAT6B	10q22.2	43	6.3	13	8.67	11	6.55	0.576	0.868	(B) BRAF Class 2
FANCM	14q21.2	39	5.22	9	5.39	14	7.14	0.576	0.868	(C) BRAF Class 3
CAMK1	3p25.3	2	0.06	0	0	1	0.13	0.577	0.868	(C) BRAF Class 3
TRBC2	7q34	2	0.06	0	0	1	0.13	0.577	0.868	(C) BRAF Class 3
RINT1	7q22.3	13	2.23	5	3.82	4	2.74	0.578	0.868	(B) BRAF Class 2
DDB2	11p11.2	15	1.47	2	0.92	5	2.09	0.582	0.871	(C) BRAF Class 3
GPS2	17p13.1	13	1.14	3	1.15	1	0.41	0.582	0.871	(B) BRAF Class 2
CD22	19q13.12	2	1.72	0	0	0	0	0.582	0.871	(A) BRAF Class 1 v12
RTEL1	20q13.33	22	4.13	7	5	8	6.2	0.585	0.872	(C) BRAF Class 3
FGF1	5q31.3	4	1.2	0	0	0	0	0.586	0.872	(A) BRAF Class 1 v12
CACNA1E	1q25.3	3	6.25	1	12.5	0	0	0.587	0.872	(B) BRAF Class 2
TGFB1	19q13.2	3	6.25	0	0	1	12.5	0.587	0.872	(C) BRAF Class 3
GATA2	3q21.3	50	2.29	8	1.66	9	1.79	0.587	0.872	(A) BRAF Class 1 v12
MED12	Xq13.1	118	5.36	27	4.95	33	6.31	0.589	0.872	(C) BRAF Class 3
CD274	9p24.1	20	0.83	4	0.73	7	1.24	0.59	0.872	(C) BRAF Class 3
BABAM2	2p23.2	14	2.41	2	1.53	5	3.42	0.59	0.872	(C) BRAF Class 3
FIP1L1	4q12	2	1.31	1	3.03	1	3.85	0.592	0.872	(C) BRAF Class 3
UMODL1	21q22.3	3	6.25	0	0	0	0	0.592	0.872	(A) BRAF Class 1 v12
PRF1	10q22.1	29	3.13	4	1.99	5	2.29	0.593	0.872	(A) BRAF Class 1 v12
RPS6KA2	6q27	3	2.56	0	0	0	0	0.593	0.872	(A) BRAF Class 1 v12
TNK2	3q29	3	2.56	0	0	0	0	0.593	0.872	(A) BRAF Class 1 v12
LTK	15q15.1	3	1.3	1	1.75	0	0	0.594	0.872	(B) BRAF Class 2
OGG1	3p25.3	4	0.69	1	0.76	0	0	0.594	0.872	(B) BRAF Class 2
KMT2B	19q13.12	121	11.62	20	9.43	27	12.27	0.598	0.876	(C) BRAF Class 3
HIST1H3A	6p22.2	2	0.18	1	0.39	0	0	0.599	0.877	(B) BRAF Class 2
NEIL1	15q24.2	9	1.55	1	0.76	1	0.68	0.603	0.881	(A) BRAF Class 1 v12
MITF	3p13	64	2.6	12	2.17	18	3.12	0.604	0.882	(C) BRAF Class 3
XPA	9q22.33	12	1.17	1	0.46	2	0.84	0.605	0.882	(A) BRAF Class 1 v12
MYOD1	11p15.1	29	2.31	4	1.4	5	1.88	0.606	0.883	(A) BRAF Class 1 v12
CHD1	5q15-q21.1	6	3.85	0	0	1	3.33	0.608	0.885	(A) BRAF Class 1 v12
DOT1L	19p13.3	78	4.99	15	4.19	21	5.8	0.611	0.888	(C) BRAF Class 3
HIST1H1C	6p22.2	25	2	5	1.75	3	1.11	0.613	0.89	(A) BRAF Class 1 v12
BTG1	12q21.33	2	0.3	1	0.84	1	0.68	0.617	0.892	(B) BRAF Class 2
ERCC5	13q33.1	73	3.36	17	3.5	21	4.26	0.618	0.892	(C) BRAF Class 3
THADA	2p21	3	1.94	0	0	0	0	0.618	0.892	(A) BRAF Class 1 v12
BRCC3	Xq28	12	2.03	4	3.01	2	1.35	0.619	0.892	(B) BRAF Class 2
ACVR1	2q24.1	22	1.17	3	0.72	6	1.42	0.62	0.892	(C) BRAF Class 3
FAAP24	19q13.11	2	0.34	0	0	0	0	0.621	0.892	(A) BRAF Class 1 v12
TAZ	Xq28	2	0.34	0	0	0	0	0.621	0.892	(A) BRAF Class 1 v12
FUBP1	1p31.1	28	1.85	5	1.45	4	1.16	0.623	0.892	(A) BRAF Class 1 v12
CRLF2	Xp22.33 and Yp11.2	31	1.31	7	1.33	10	1.85	0.623	0.892	(C) BRAF Class 3
FAT3	11q14.3	21	8.14	6	12	7	10.45	0.623	0.892	(B) BRAF Class 2
ABL2	1q25.2	20	3.01	5	4.81	4	3.08	0.624	0.892	(B) BRAF Class 2
BCORL1	Xq26.1	114	7.06	18	5.57	26	6.95	0.624	0.892	(A) BRAF Class 1 v12
PAK3	Xq23	17	2.49	4	3.7	5	3.65	0.626	0.892	(B) BRAF Class 2
PIK3CB	3q22.3	48	3.23	8	2.37	12	3.6	0.626	0.892	(C) BRAF Class 3
CD58	1p13.1	3	0.7	1	1.2	0	0	0.626	0.892	(B) BRAF Class 2
VHL	3p25.3	26	0.83	8	1.21	6	0.86	0.63	0.896	(B) BRAF Class 2
AKT2	19q13.2	50	1.94	13	2.29	9	1.52	0.631	0.896	(B) BRAF Class 2
HMBS	11q23.3	7	1.2	3	2.29	2	1.37	0.632	0.897	(B) BRAF Class 2
FN1	2q35	3	2.56	0	0	1	4.76	0.634	0.898	(C) BRAF Class 3
FOXP4	6p21.1	3	2.56	0	0	1	4.76	0.634	0.898	(C) BRAF Class 3
SAMD9	7q21.2	4	2.14	0	0	1	3.23	0.635	0.898	(C) BRAF Class 3
FYN	6q21	26	2.06	6	2.14	8	3	0.64	0.902	(C) BRAF Class 3
EPB41L4A	5q22.1-q22.2	2	0.06	0	0	0	0	0.64	0.902	(A) BRAF Class 1 v12
H19	11p15.5	2	0.06	0	0	0	0	0.64	0.902	(A) BRAF Class 1 v12
NUTM1	15q14	29	5.06	5	5.38	8	7.27	0.643	0.906	(C) BRAF Class 3
PAK1	11q13.5-q14.1	14	1.06	5	1.69	3	1.05	0.645	0.907	(B) BRAF Class 2
HIST1H3F	6p22.2	4	0.36	2	0.79	1	0.43	0.646	0.907	(B) BRAF Class 2
GSTM5	1p13.3	4	1.13	0	0	1	1.45	0.647	0.907	(C) BRAF Class 3
NAB2	12q13.3	13	3.9	1	2.5	3	6.25	0.649	0.909	(C) BRAF Class 3
IRF2	4q35.1	6	1.15	2	2.22	2	1.85	0.652	0.912	(B) BRAF Class 2
CDH20	18q21.33	2	1	0	0	1	1.96	0.654	0.913	(C) BRAF Class 3
ABRAXAS1	4q21.23	17	0.89	2	0.46	4	0.88	0.655	0.913	(A) BRAF Class 1 v12
TCF3	19p13.3	65	3.07	12	2.55	17	3.58	0.655	0.913	(C) BRAF Class 3
ZFPM1	16q24.2	3	3.26	1	6.67	0	0	0.657	0.913	(B) BRAF Class 2
NRIP1	21q11.2-q21.1	3	3.26	0	0	0	0	0.658	0.913	(A) BRAF Class 1 v12
PHOX2B	4p13	48	2.08	10	1.96	14	2.68	0.66	0.913	(C) BRAF Class 3
FGFR3	4p16.3	90	2.69	24	3.2	23	3.12	0.66	0.913	(B) BRAF Class 2
PIK3R2	19p13.11	34	2.21	5	1.47	8	2.32	0.661	0.913	(C) BRAF Class 3
XIAP	Xq25	13	1.1	2	0.74	4	1.56	0.662	0.913	(C) BRAF Class 3
CBFB	16q22.1	16	0.76	3	0.62	2	0.4	0.663	0.913	(A) BRAF Class 1 v12
BRINP3	1q31.1	5	4.24	1	4.76	0	0	0.663	0.913	(B) BRAF Class 2
HDAC4	2q37.3	3	1.35	0	0	1	2.27	0.663	0.913	(C) BRAF Class 3
STAT3	17q21.2	46	1.88	8	1.47	8	1.43	0.663	0.913	(A) BRAF Class 1 v12
KMT5A	12q24.31	3	0.54	1	0.68	0	0	0.667	0.913	(B) BRAF Class 2
ABL1	9q34.12	88	2.8	19	2.88	24	3.43	0.669	0.913	(C) BRAF Class 3
EIF4A2	3q27.3	11	0.98	4	1.56	2	0.85	0.676	0.913	(B) BRAF Class 2
RPL26	17p13.1	2	0.57	0	0	0	0	0.677	0.913	(A) BRAF Class 1 v12
SRSF2	17q25.1	27	1.2	4	0.81	7	1.38	0.68	0.913	(C) BRAF Class 3
ARHGEF12	11q23.3	25	4.26	8	6.02	7	4.76	0.681	0.913	(B) BRAF Class 2
USP7	16p13.2	2	2.33	0	0	0	0	0.685	0.913	(A) BRAF Class 1 v12
NPRL2	3p21.31	3	1.14	0	0	1	1.72	0.685	0.913	(C) BRAF Class 3
CLDN18	3q22.3	4	2.56	0	0	1	3.33	0.686	0.913	(C) BRAF Class 3
ASPSCR1	17q25.3	2	1.72	0	0	0	0	0.687	0.913	(A) BRAF Class 1 v12
SS18	18q11.2	8	1.01	3	1.78	2	1.04	0.688	0.913	(B) BRAF Class 2
MAP2K4	17p12	41	1.62	12	2.14	10	1.71	0.69	0.913	(B) BRAF Class 2
DUSP2	2q11.2	2	0.91	0	0	0	0	0.69	0.913	(A) BRAF Class 1 v12
ICOSLG	21q22.3	16	1.35	5	1.84	5	1.95	0.695	0.913	(C) BRAF Class 3
SMARCE1	17q21.2	5	0.74	2	1.32	2	1.26	0.699	0.913	(B) BRAF Class 2
CDKN2C	1p32.3	14	0.57	3	0.54	5	0.87	0.699	0.913	(C) BRAF Class 3
KNL1	15q15.1	2	1.64	0	0	0	0	0.7	0.913	(A) BRAF Class 1 v12
EPHB6	7q34	2	1	1	2.5	1	1.96	0.701	0.913	(B) BRAF Class 2
LATS2	13q12.11	49	4.07	10	3.57	13	4.98	0.701	0.913	(C) BRAF Class 3
ERCC6	10q11.23	34	5.84	10	7.63	8	5.48	0.703	0.913	(B) BRAF Class 2
MAX	14q23.3	15	0.79	5	1.17	3	0.71	0.704	0.913	(B) BRAF Class 2
BCL10	1p22.3	17	1.4	3	1.1	5	1.95	0.704	0.913	(C) BRAF Class 3
DIS3L2	2q37.1	19	2.91	5	3.47	3	1.92	0.705	0.913	(B) BRAF Class 2
GUCY1A2	11q22.3	2	1.71	0	0	0	0	0.707	0.913	(A) BRAF Class 1 v12
NLRP1	17p13.2	2	1.71	0	0	0	0	0.707	0.913	(A) BRAF Class 1 v12
STK36	2q35	2	1.71	0	0	0	0	0.707	0.913	(A) BRAF Class 1 v12
TRIM24	7q33-q34	2	1.71	0	0	0	0	0.707	0.913	(A) BRAF Class 1 v12
MYCN	2p24.3	43	1.69	11	1.8	13	2.2	0.708	0.913	(C) BRAF Class 3
FANCC	9q22.32	38	1.54	6	1.08	9	1.56	0.709	0.913	(C) BRAF Class 3
NBN	8q21.3	77	3.05	19	3.38	15	2.56	0.711	0.913	(B) BRAF Class 2
FAS	10q23.31	18	1.23	2	0.67	4	1.19	0.711	0.913	(A) BRAF Class 1 v12
BUB1B	15q15.1	24	2.35	7	3.21	7	2.93	0.711	0.913	(B) BRAF Class 2
NEIL2	8p23.1	4	0.69	1	0.76	2	1.37	0.713	0.913	(C) BRAF Class 3
SAMD9L	7q21.2	4	4.35	1	6.67	1	10	0.713	0.913	(C) BRAF Class 3
PLCG2	16q23.3	51	3.91	11	3.73	14	4.88	0.721	0.913	(C) BRAF Class 3
DNAH9	17p12	6	8.7	2	12.5	2	15.38	0.725	0.913	(C) BRAF Class 3
PIK3C3	18q12.3	33	2.51	6	1.97	9	2.99	0.725	0.913	(C) BRAF Class 3
GLI3	7p14.1	26	7.37	5	7.35	7	10.14	0.726	0.913	(C) BRAF Class 3
BIRC3	11q22.2	15	1.23	5	1.81	4	1.55	0.729	0.913	(B) BRAF Class 2
DNMT1	19p13.2	54	4.1	15	5.07	13	4.66	0.732	0.913	(B) BRAF Class 2
EPHB4	7q22.1	4	1.33	1	1.43	2	2.56	0.734	0.913	(C) BRAF Class 3
SMARCB1	22q11.23|22q11	41	1.28	11	1.65	10	1.42	0.739	0.913	(B) BRAF Class 2
EMSY	11q13.5	15	2.12	4	3.2	4	2.6	0.74	0.913	(B) BRAF Class 2
SOCS1	16p13.13	26	1.06	4	0.72	5	0.87	0.74	0.913	(A) BRAF Class 1 v12
RECQL	12p12.1	14	2.64	4	2.88	2	1.55	0.741	0.913	(B) BRAF Class 2
HNF1A	12q24.31	106	3.35	24	3.62	20	2.89	0.746	0.913	(B) BRAF Class 2
RRAGC	1p34.3	5	0.75	2	1.23	2	1.26	0.746	0.913	(C) BRAF Class 3
CSMD3	8q23.3	3	2.56	1	5.26	1	4.76	0.748	0.913	(B) BRAF Class 2
ITGA10	1q21.1	3	2.56	1	5.26	1	4.76	0.748	0.913	(B) BRAF Class 2
STK40	1p34.3	12	1.01	3	1.1	4	1.56	0.75	0.913	(C) BRAF Class 3
VTCN1	1p13.1-p12	13	1.1	4	1.47	2	0.78	0.75	0.913	(B) BRAF Class 2
PRKCI	3q26.2	48	2.5	13	3.08	13	2.88	0.752	0.913	(B) BRAF Class 2
FANCG	9p13.3	26	1.61	6	1.86	8	2.16	0.754	0.913	(C) BRAF Class 3
SMYD3	1q44	8	1.51	3	2.16	3	2.33	0.756	0.913	(C) BRAF Class 3
BBC3	19q13.32	8	0.68	1	0.37	1	0.39	0.757	0.913	(A) BRAF Class 1 v12
RNF213	17q25.3	7	5.74	2	9.52	1	4.55	0.758	0.913	(B) BRAF Class 2
ABCB4	7q21.12	2	2.17	0	0	0	0	0.758	0.913	(A) BRAF Class 1 v12
OGA	10q24.32	2	2.17	0	0	0	0	0.758	0.913	(A) BRAF Class 1 v12
SIN3A	15q24.2	3	1.92	1	4	1	3.33	0.763	0.913	(B) BRAF Class 2
SOS2	14q21.3	3	1.92	1	4	1	3.33	0.763	0.913	(B) BRAF Class 2
HIST1H3E	6p22.2	10	0.9	2	0.79	1	0.43	0.763	0.913	(A) BRAF Class 1 v12
TSHR	14q31.1	56	2.59	13	2.68	16	3.18	0.764	0.913	(C) BRAF Class 3
MEN1	11q13.1	57	2.32	10	1.81	13	2.25	0.765	0.913	(A) BRAF Class 1 v12
JAZF1	7p15.2-p15.1	6	0.77	2	1.2	1	0.53	0.767	0.913	(B) BRAF Class 2
CDKN2B-AS1	9p21.3	1	0.26	0	0	0	0	0.767	0.913	(A) BRAF Class 1 v12
IGF2	11p15.5	24	1.15	7	1.5	5	1.02	0.769	0.913	(B) BRAF Class 2
CHD5	1p36.31	10	6.41	2	8	3	10	0.769	0.913	(C) BRAF Class 3
BTK	Xq22.1	27	1.64	7	1.91	8	2.16	0.769	0.913	(C) BRAF Class 3
MDM2	12q15	43	1.69	12	2.13	10	1.71	0.772	0.913	(B) BRAF Class 2
CHD4	12p13.31	38	6.05	7	7.29	6	4.96	0.773	0.913	(B) BRAF Class 2
PHLPP2	16q22.2	1	0.76	0	0	0	0	0.773	0.913	(A) BRAF Class 1 v12
SGK1	6q23.2	1	0.66	0	0	0	0	0.774	0.913	(A) BRAF Class 1 v12
IGF1R	15q26.3	111	4.32	27	4.74	23	3.89	0.775	0.913	(B) BRAF Class 2
KIF1B	1p36.22	27	4.64	5	3.82	5	3.42	0.776	0.913	(A) BRAF Class 1 v12
EIF4E	4q23	5	0.45	2	0.79	1	0.43	0.776	0.913	(B) BRAF Class 2
GATA1	Xp11.23	20	1.27	4	1.16	6	1.71	0.776	0.913	(C) BRAF Class 3
MUS81	11q13.1	12	2.06	2	1.53	4	2.74	0.777	0.913	(C) BRAF Class 3
TAF1	Xq13.1	28	5.31	4	5	7	7	0.777	0.913	(C) BRAF Class 3
KIF5B	10p11.22	11	2.68	2	3.64	1	1.56	0.778	0.913	(B) BRAF Class 2
TPMT	6p22.3	1	0.66	0	0	0	0	0.778	0.913	(A) BRAF Class 1 v12
INPPL1	11q13.4	31	5.85	6	4.32	7	5.43	0.779	0.913	(A) BRAF Class 1 v12
ERRFI1	1p36.23	25	1.74	4	1.22	6	1.85	0.78	0.913	(C) BRAF Class 3
HLA-C	6p21.33	1	0.87	0	0	0	0	0.783	0.913	(A) BRAF Class 1 v12
CCND1	11q13.3	34	1.34	10	1.64	7	1.19	0.783	0.913	(B) BRAF Class 2
REL	2p16.1	41	1.68	7	1.27	9	1.56	0.783	0.913	(A) BRAF Class 1 v12
CDC73	1q31.2	42	1.71	11	1.99	12	2.08	0.785	0.913	(C) BRAF Class 3
SLX1B	16p11.2	1	0.17	0	0	0	0	0.788	0.913	(A) BRAF Class 1 v12
ETV5	3q27.2	24	1.65	4	1.35	4	1.18	0.788	0.913	(A) BRAF Class 1 v12
SMO	7q32.1	99	3.11	21	2.94	25	3.54	0.789	0.913	(C) BRAF Class 3
CDK2	12q13.2	3	0.69	1	1.28	1	1.28	0.791	0.913	(C) BRAF Class 3
SDHC	1q23.3	18	0.76	3	0.56	3	0.54	0.792	0.913	(A) BRAF Class 1 v12
UGT1A1	2q37.1	1	0.4	0	0	0	0	0.793	0.913	(A) BRAF Class 1 v12
CDH5	16q21	1	0.5	0	0	0	0	0.796	0.913	(A) BRAF Class 1 v12
STAT5A	17q21.2	20	1.69	3	1.12	4	1.61	0.798	0.913	(A) BRAF Class 1 v12
ABCA17P	16p13.3	1	0.03	0	0	0	0	0.8	0.913	(A) BRAF Class 1 v12
ABR	17p13.3	1	0.03	0	0	0	0	0.8	0.913	(A) BRAF Class 1 v12
ANKLE2	12q24.33	1	0.03	0	0	0	0	0.8	0.913	(A) BRAF Class 1 v12
ANKRD30A	10p11.21	1	0.03	0	0	0	0	0.8	0.913	(A) BRAF Class 1 v12
AP1G1	16q22.2	1	0.03	0	0	0	0	0.8	0.913	(A) BRAF Class 1 v12
APBA1	9q21.12	1	0.03	0	0	0	0	0.8	0.913	(A) BRAF Class 1 v12
ARHGAP4	Xq28	1	0.03	0	0	0	0	0.8	0.913	(A) BRAF Class 1 v12
ARSB	5q14.1	1	0.03	0	0	0	0	0.8	0.913	(A) BRAF Class 1 v12
CASZ1	1p36.22	1	0.03	0	0	0	0	0.8	0.913	(A) BRAF Class 1 v12
CLIP1	12q24.31	1	0.03	0	0	0	0	0.8	0.913	(A) BRAF Class 1 v12
CPSF1	8q24.3	1	0.03	0	0	0	0	0.8	0.913	(A) BRAF Class 1 v12
CTDSP1	2q35	1	0.03	0	0	0	0	0.8	0.913	(A) BRAF Class 1 v12
CTRC	1p36.21	1	0.03	0	0	0	0	0.8	0.913	(A) BRAF Class 1 v12
CTSB	8p23.1	1	0.03	0	0	0	0	0.8	0.913	(A) BRAF Class 1 v12
CUL1	7q36.1	1	0.03	0	0	0	0	0.8	0.913	(A) BRAF Class 1 v12
DCBLD1	6q22.1	1	0.03	0	0	0	0	0.8	0.913	(A) BRAF Class 1 v12
DDAH1	1p22.3	1	0.03	0	0	0	0	0.8	0.913	(A) BRAF Class 1 v12
DEF8	16q24.3	1	0.03	0	0	0	0	0.8	0.913	(A) BRAF Class 1 v12
DENND4C	9p22.1	1	0.03	0	0	0	0	0.8	0.913	(A) BRAF Class 1 v12
DHRSX	Xp22.33 and Yp11.2	1	0.03	0	0	0	0	0.8	0.913	(A) BRAF Class 1 v12
DRICH1	22q11.23	1	0.03	0	0	0	0	0.8	0.913	(A) BRAF Class 1 v12
EIF3E	8q23.1	1	0.03	0	0	0	0	0.8	0.913	(A) BRAF Class 1 v12
ELAC2	17p12	1	0.03	0	0	0	0	0.8	0.913	(A) BRAF Class 1 v12
EMID1	22q12.2	1	0.03	0	0	0	0	0.8	0.913	(A) BRAF Class 1 v12
F11-AS1	4q35.2	1	0.03	0	0	0	0	0.8	0.913	(A) BRAF Class 1 v12
FKBP9P1	7p11.2	1	0.03	0	0	0	0	0.8	0.913	(A) BRAF Class 1 v12
GALNT11	7q36.1|7q36.1	1	0.03	0	0	0	0	0.8	0.913	(A) BRAF Class 1 v12
GOLT1A	1q32.1	1	0.03	0	0	0	0	0.8	0.913	(A) BRAF Class 1 v12
GRAPL	17p11.2	1	0.03	0	0	0	0	0.8	0.913	(A) BRAF Class 1 v12
GRIA1	5q33.2	1	0.03	0	0	0	0	0.8	0.913	(A) BRAF Class 1 v12
GRIK1	21q21.3	1	0.03	0	0	0	0	0.8	0.913	(A) BRAF Class 1 v12
HECTD4	12q24.13	1	0.03	0	0	0	0	0.8	0.913	(A) BRAF Class 1 v12
HLA-DOB	6p21.32	1	0.03	0	0	0	0	0.8	0.913	(A) BRAF Class 1 v12
HOOK2	19p13.13	1	0.03	0	0	0	0	0.8	0.913	(A) BRAF Class 1 v12
HSD17B6	12q13.3	1	0.03	0	0	0	0	0.8	0.913	(A) BRAF Class 1 v12
IGHE	14q32.33	1	0.03	0	0	0	0	0.8	0.913	(A) BRAF Class 1 v12
LDLR	19p13.2	1	0.03	0	0	0	0	0.8	0.913	(A) BRAF Class 1 v12
LOC105374464	2p22.2	1	0.03	0	0	0	0	0.8	0.913	(A) BRAF Class 1 v12
LTBP4	19q13.2	1	0.03	0	0	0	0	0.8	0.913	(A) BRAF Class 1 v12
MYEOV	11q13.3	1	0.03	0	0	0	0	0.8	0.913	(A) BRAF Class 1 v12
MYO1D	17q11.2	1	0.03	0	0	0	0	0.8	0.913	(A) BRAF Class 1 v12
MYSM1	1p32.1	1	0.03	0	0	0	0	0.8	0.913	(A) BRAF Class 1 v12
NBPF20	1q21.1	1	0.03	0	0	0	0	0.8	0.913	(A) BRAF Class 1 v12
NDUFB2	7q34	1	0.03	0	0	0	0	0.8	0.913	(A) BRAF Class 1 v12
NELFA	4p16.3	1	0.03	0	0	0	0	0.8	0.913	(A) BRAF Class 1 v12
PADI2	1p36.13	1	0.03	0	0	0	0	0.8	0.913	(A) BRAF Class 1 v12
PAX9	14q13.3	1	0.03	0	0	0	0	0.8	0.913	(A) BRAF Class 1 v12
PFKFB4	3p21.31	1	0.03	0	0	0	0	0.8	0.913	(A) BRAF Class 1 v12
PKD1	16p13.3	1	0.03	0	0	0	0	0.8	0.913	(A) BRAF Class 1 v12
PLEKHA7	11p15.2-p15.1	1	0.03	0	0	0	0	0.8	0.913	(A) BRAF Class 1 v12
PLVAP	19p13.11	1	0.03	0	0	0	0	0.8	0.913	(A) BRAF Class 1 v12
PNPLA6	19p13.2	1	0.03	0	0	0	0	0.8	0.913	(A) BRAF Class 1 v12
PRMT6	1p13.3	1	0.03	0	0	0	0	0.8	0.913	(A) BRAF Class 1 v12
PTBP3	9q32	1	0.03	0	0	0	0	0.8	0.913	(A) BRAF Class 1 v12
RAB2A	8q12.1-q12.2	1	0.03	0	0	0	0	0.8	0.913	(A) BRAF Class 1 v12
SAE1	19q13.32	1	0.03	0	0	0	0	0.8	0.913	(A) BRAF Class 1 v12
SCAP	3p21.31	1	0.03	0	0	0	0	0.8	0.913	(A) BRAF Class 1 v12
SCARA5	8p21.1	1	0.03	0	0	0	0	0.8	0.913	(A) BRAF Class 1 v12
SDCCAG8	1q43-q44	1	0.03	0	0	0	0	0.8	0.913	(A) BRAF Class 1 v12
SEMA6D	15q21.1	1	0.03	0	0	0	0	0.8	0.913	(A) BRAF Class 1 v12
SIK3	11q23.3	1	0.03	0	0	0	0	0.8	0.913	(A) BRAF Class 1 v12
SLC30A5	5q13.1-q13.2	1	0.03	0	0	0	0	0.8	0.913	(A) BRAF Class 1 v12
SND1	7q32.1	1	0.03	0	0	0	0	0.8	0.913	(A) BRAF Class 1 v12
SPG11	15q21.1	1	0.03	0	0	0	0	0.8	0.913	(A) BRAF Class 1 v12
TCAF2P1	7q35	1	0.03	0	0	0	0	0.8	0.913	(A) BRAF Class 1 v12
TRAJ32	14q11.2	1	0.03	0	0	0	0	0.8	0.913	(A) BRAF Class 1 v12
TRAJ42	14q11.2	1	0.03	0	0	0	0	0.8	0.913	(A) BRAF Class 1 v12
TRAJ53	14q11.2	1	0.03	0	0	0	0	0.8	0.913	(A) BRAF Class 1 v12
TRBJ2-2	7q34	1	0.03	0	0	0	0	0.8	0.913	(A) BRAF Class 1 v12
TRGJP	7p14.1	1	0.03	0	0	0	0	0.8	0.913	(A) BRAF Class 1 v12
TSPOAP1	17q22	1	0.03	0	0	0	0	0.8	0.913	(A) BRAF Class 1 v12
UGT1A6	2q37.1	1	0.03	0	0	0	0	0.8	0.913	(A) BRAF Class 1 v12
ZNF423	16q12.1	1	0.03	0	0	0	0	0.8	0.913	(A) BRAF Class 1 v12
ZNF599	19q13.11	1	0.03	0	0	0	0	0.8	0.913	(A) BRAF Class 1 v12
HSD3B1	1p12	13	2.48	3	3.33	2	1.85	0.801	0.913	(B) BRAF Class 2
ZNF217	20q13.2	54	3.38	10	3.12	10	2.71	0.801	0.913	(A) BRAF Class 1 v12
MAP3K14	17q21.31	1	0.08	0	0	0	0	0.804	0.913	(A) BRAF Class 1 v12
PRDM1	6q21	90	3.66	18	3.25	23	3.99	0.806	0.913	(C) BRAF Class 3
NCOR2	12q24.31	3	2.61	1	4.76	1	4.55	0.807	0.913	(B) BRAF Class 2
XPO1	2p15	48	1.89	13	2.3	12	2.05	0.808	0.913	(B) BRAF Class 2
RAD51B	14q24.1	13	0.93	4	1.22	4	1.25	0.811	0.913	(C) BRAF Class 3
CBFA2T3	16q24.3	24	4.09	7	5.26	7	4.76	0.812	0.913	(B) BRAF Class 2
MSI1	12q24.31	8	1.51	2	1.44	1	0.78	0.812	0.913	(A) BRAF Class 1 v12
MSI2	17q22	6	1.13	1	0.72	2	1.55	0.813	0.913	(C) BRAF Class 3
HNRNPK	9q21.32	4	0.93	1	1.69	1	1.52	0.814	0.913	(B) BRAF Class 2
GEN1	2p24.2	24	2.31	5	2.49	4	1.69	0.815	0.913	(B) BRAF Class 2
XRCC2	7q36.1	23	1.22	7	1.61	6	1.34	0.815	0.913	(B) BRAF Class 2
TCF7L1	2p11.2	8	1.79	2	2.35	1	1.11	0.822	0.913	(B) BRAF Class 2
BCL2L2	14q11.2	1	0.14	0	0	0	0	0.822	0.913	(A) BRAF Class 1 v12
GID4	17p11.2|17p11.2	1	0.17	0	0	0	0	0.823	0.913	(A) BRAF Class 1 v12
STK19	6p21.33	12	2.26	2	1.44	3	2.33	0.824	0.913	(C) BRAF Class 3
EP300	22q13.2	172	6.99	36	6.51	43	7.45	0.825	0.913	(C) BRAF Class 3
IKZF3	17q12-q21.1	7	1.26	2	1.92	2	1.77	0.826	0.913	(B) BRAF Class 2
IRF8	16q24.1	1	0.81	0	0	0	0	0.826	0.913	(A) BRAF Class 1 v12
DUSP6	12q21.33	1	1.16	0	0	0	0	0.829	0.913	(A) BRAF Class 1 v12
HSPA5	9q33.3	1	1.16	0	0	0	0	0.829	0.913	(A) BRAF Class 1 v12
RBBP8	18q11.2	30	5.15	6	4.58	9	6.16	0.829	0.913	(C) BRAF Class 3
MRTFA	22q13.1-q13.2	1	0.86	0	0	0	0	0.83	0.913	(A) BRAF Class 1 v12
PRDM16	1p36.32	1	0.86	0	0	0	0	0.83	0.913	(A) BRAF Class 1 v12
FOXO3	6q21	1	0.81	0	0	0	0	0.832	0.913	(A) BRAF Class 1 v12
CSF1R	5q32	64	2.49	14	2.69	16	2.93	0.834	0.913	(C) BRAF Class 3
CDK5	7q36.1	3	0.85	1	1.47	1	1.45	0.834	0.913	(B) BRAF Class 2
MLF1	3q25.32	1	1.89	0	0	0	0	0.834	0.913	(A) BRAF Class 1 v12
YAP1	11q22.1	29	1.55	5	1.18	7	1.62	0.834	0.913	(C) BRAF Class 3
SPI1	11p11.2	1	0.9	0	0	0	0	0.834	0.913	(A) BRAF Class 1 v12
AGO2	8q24.3	26	4.91	7	5.04	8	6.2	0.835	0.913	(C) BRAF Class 3
GNAQ	9q21.2	28	0.86	8	1.08	7	0.96	0.836	0.913	(B) BRAF Class 2
KIF3A	5q31.1	1	2.33	0	0	0	0	0.837	0.913	(A) BRAF Class 1 v12
ARNT	1q21.3	1	0.82	0	0	0	0	0.838	0.913	(A) BRAF Class 1 v12
MUC1	1q22	1	0.82	0	0	0	0	0.838	0.913	(A) BRAF Class 1 v12
NFKB2	10q24.32	1	0.82	0	0	0	0	0.838	0.913	(A) BRAF Class 1 v12
PER1	17p13.1	1	0.82	0	0	0	0	0.838	0.913	(A) BRAF Class 1 v12
PSIP1	9p22.3	1	0.82	0	0	0	0	0.838	0.913	(A) BRAF Class 1 v12
TLX1	10q24.31	1	0.82	0	0	0	0	0.838	0.913	(A) BRAF Class 1 v12
TPR	1q31.1	1	0.82	0	0	0	0	0.838	0.913	(A) BRAF Class 1 v12
ZNF384	12p13.31	1	0.82	0	0	0	0	0.838	0.913	(A) BRAF Class 1 v12
SHH	7q36.3	1	0.64	0	0	0	0	0.838	0.913	(A) BRAF Class 1 v12
SPRY2	13q31.1	1	0.64	0	0	0	0	0.838	0.913	(A) BRAF Class 1 v12
LCK	1p35.2	1	0.8	0	0	0	0	0.838	0.913	(A) BRAF Class 1 v12
MLLT1	19p13.3	1	1.59	0	0	0	0	0.838	0.913	(A) BRAF Class 1 v12
TBL1XR1	3q26.32	1	0.97	0	0	0	0	0.839	0.913	(A) BRAF Class 1 v12
AURKC	19q13.43	1	0.85	0	0	0	0	0.842	0.913	(A) BRAF Class 1 v12
BLNK	10q24.1	1	0.85	0	0	0	0	0.842	0.913	(A) BRAF Class 1 v12
CYP2C19	10q23.33	1	0.85	0	0	0	0	0.842	0.913	(A) BRAF Class 1 v12
DST	6p12.1	1	0.85	0	0	0	0	0.842	0.913	(A) BRAF Class 1 v12
GDNF	5p13.2	1	0.85	0	0	0	0	0.842	0.913	(A) BRAF Class 1 v12
IKBKB	8p11.21	1	0.85	0	0	0	0	0.842	0.913	(A) BRAF Class 1 v12
ITGA9	3p22.2	1	0.85	0	0	0	0	0.842	0.913	(A) BRAF Class 1 v12
ITGB3	17q21.32	1	0.85	0	0	0	0	0.842	0.913	(A) BRAF Class 1 v12
PLEKHG5	1p36.31	1	0.85	0	0	0	0	0.842	0.913	(A) BRAF Class 1 v12
RRM1	11p15.4	1	0.85	0	0	0	0	0.842	0.913	(A) BRAF Class 1 v12
DNAJB1	19p13.12	14	1.07	2	0.69	3	1.08	0.842	0.913	(C) BRAF Class 3
MYC	8q24.21	89	3.46	20	3.25	23	3.85	0.843	0.913	(C) BRAF Class 3
ARFGAP3	22q13.2	1	2.08	0	0	0	0	0.844	0.913	(A) BRAF Class 1 v12
GNAI3	1p13.3	1	2.08	0	0	0	0	0.844	0.913	(A) BRAF Class 1 v12
SNX31	8q22.3	1	2.08	0	0	0	0	0.844	0.913	(A) BRAF Class 1 v12
TMEM216	11q12.2	1	2.08	0	0	0	0	0.844	0.913	(A) BRAF Class 1 v12
SP140	2q37.1	1	1.96	0	0	0	0	0.844	0.913	(A) BRAF Class 1 v12
BIRC5	17q25.3	1	0.53	0	0	0	0	0.844	0.913	(A) BRAF Class 1 v12
POLH	6p21.1	11	1.71	3	2.11	2	1.26	0.847	0.915	(B) BRAF Class 2
HIP1	7q11.23	1	1.11	0	0	0	0	0.85	0.917	(A) BRAF Class 1 v12
PIK3R3	1p34.1	13	1.1	2	0.74	3	1.17	0.851	0.917	(C) BRAF Class 3
ERCC1	19q13.32	7	0.66	2	1.01	2	0.85	0.851	0.917	(B) BRAF Class 2
ETNK1	12p12.1	1	0.63	0	0	0	0	0.853	0.918	(A) BRAF Class 1 v12
LMO2	11p13	6	0.65	1	0.5	2	0.93	0.862	0.927	(C) BRAF Class 3
BMPR1A	10q23.2	48	2.06	9	1.73	10	1.88	0.87	0.932	(A) BRAF Class 1 v12
KBTBD4	11p11.2	1	0.98	0	0	0	0	0.871	0.932	(A) BRAF Class 1 v12
FOSB	19q13.32	1	1.09	0	0	0	0	0.872	0.932	(A) BRAF Class 1 v12
MAML3	4q31.1	1	1.09	0	0	0	0	0.872	0.932	(A) BRAF Class 1 v12
OTX2	14q22.3	1	1.09	0	0	0	0	0.872	0.932	(A) BRAF Class 1 v12
TBXT	6q27	1	1.09	0	0	0	0	0.872	0.932	(A) BRAF Class 1 v12
EWSR1	22q12.2	28	1.76	6	1.88	8	2.16	0.872	0.932	(C) BRAF Class 3
PRKD1	14q12	11	1.85	2	1.33	3	2.11	0.873	0.932	(C) BRAF Class 3
SESN1	6q21	6	1.13	1	0.72	1	0.78	0.874	0.932	(A) BRAF Class 1 v12
LIG4	13q33.3	20	3.44	5	3.82	4	2.74	0.876	0.932	(B) BRAF Class 2
CD3EAP	19q13.32	1	0.3	0	0	0	0	0.876	0.932	(A) BRAF Class 1 v12
TSPAN31	12q14.1	1	0.3	0	0	0	0	0.876	0.932	(A) BRAF Class 1 v12
FH	1q43	48	1.97	9	1.64	11	1.93	0.879	0.933	(A) BRAF Class 1 v12
RANBP2	2q13	56	11.34	9	12.33	9	9.89	0.879	0.933	(B) BRAF Class 2
CBLC	19q13.32	1	2.78	0	0	0	0	0.88	0.933	(A) BRAF Class 1 v12
LRIG3	12q14.1	1	2.78	0	0	0	0	0.88	0.933	(A) BRAF Class 1 v12
CHD2	15q26.1	38	6.04	6	6.19	6	4.92	0.883	0.935	(B) BRAF Class 2
BRD3	9q34.2	30	4.34	6	3.95	6	3.53	0.885	0.936	(A) BRAF Class 1 v12
PDCD1LG2	9p24.1	25	1.21	5	1.11	7	1.45	0.887	0.937	(C) BRAF Class 3
MDC1	6p21.33	65	5.49	15	5.51	16	6.25	0.89	0.94	(C) BRAF Class 3
GNB1	1p36.33	1	2.27	0	0	0	0	0.891	0.94	(A) BRAF Class 1 v12
TNFAIP3	6q23.3	59	2.4	15	2.71	15	2.6	0.893	0.941	(B) BRAF Class 2
MYBL1	8q13.1	30	2.7	5	2.16	7	2.71	0.893	0.941	(C) BRAF Class 3
PLK2	5q11.2	27	2.28	5	1.84	6	2.34	0.895	0.941	(C) BRAF Class 3
DDB1	11q12.2	21	3.61	4	3.05	6	4.11	0.895	0.941	(C) BRAF Class 3
MAGOH	1p32.3	1	0.99	0	0	0	0	0.896	0.941	(A) BRAF Class 1 v12
KDM6B	17p13.1	20	5.52	4	5.71	3	4.23	0.897	0.942	(B) BRAF Class 2
ZBTB7A	19p13.3	12	3.6	2	5	2	4.17	0.9	0.943	(B) BRAF Class 2
RPS6KA4	11q13.1	36	3.04	7	2.57	7	2.73	0.901	0.943	(A) BRAF Class 1 v12
XRCC5	2q35	10	1.66	3	2.16	3	1.99	0.905	0.946	(B) BRAF Class 2
MCM7	7q22.1	1	3.23	0	0	0	0	0.905	0.946	(A) BRAF Class 1 v12
UROD	1p34.1	9	1.55	2	1.53	3	2.05	0.906	0.946	(C) BRAF Class 3
MYH9	22q12.3	8	3.13	1	2.27	2	3.85	0.907	0.946	(C) BRAF Class 3
OLIG2	21q22.11	1	3.7	0	0	0	0	0.909	0.946	(A) BRAF Class 1 v12
IRS2	13q34	78	4.97	18	5.03	20	5.52	0.909	0.946	(C) BRAF Class 3
DCUN1D1	3q26.33	7	0.59	2	0.62	1	0.38	0.909	0.946	(B) BRAF Class 2
ZNF703	8p11.23	21	2.97	3	2.4	5	3.25	0.914	0.95	(C) BRAF Class 3
NCOR1	17p12-p11.2	79	5.32	17	5.12	16	4.76	0.915	0.95	(A) BRAF Class 1 v12
CYLD	16q12.1	49	2.36	11	2.51	10	2.1	0.916	0.95	(B) BRAF Class 2
RHOA	3p21.31	31	1.53	6	1.34	6	1.32	0.916	0.95	(A) BRAF Class 1 v12
FLT4	5q35.3	171	7.03	35	6.53	39	6.96	0.917	0.95	(A) BRAF Class 1 v12
CD79A	19q13.2	22	1.46	6	1.75	5	1.46	0.919	0.951	(B) BRAF Class 2
RHBDF2	17q25.1	25	4.3	5	3.82	7	4.79	0.923	0.953	(C) BRAF Class 3
SBDS	7q11.21	7	0.68	2	0.91	2	0.83	0.923	0.953	(B) BRAF Class 2
MAFB	20q12	3	0.44	1	0.66	1	0.59	0.923	0.953	(B) BRAF Class 2
FAAP20	1p36.33	3	0.52	1	0.76	1	0.68	0.93	0.959	(B) BRAF Class 2
ETV1	7p21.2	58	2.55	13	2.54	15	2.83	0.932	0.961	(C) BRAF Class 3
RAB35	12q24.23	11	0.99	3	1.18	2	0.85	0.933	0.961	(B) BRAF Class 2
BORCS8-MEF2B	19p13.11	19	0.57	5	0.67	4	0.54	0.937	0.963	(B) BRAF Class 2
GABRA6	5q34	16	3.05	3	3.33	4	3.7	0.937	0.963	(C) BRAF Class 3
TMEM127	2q11.2	11	0.61	3	0.72	3	0.73	0.938	0.964	(C) BRAF Class 3
HIST2H3D	1q21.2	6	0.54	1	0.4	1	0.43	0.942	0.967	(A) BRAF Class 1 v12
ARAF	Xp11.3	64	2.47	13	2.25	14	2.34	0.944	0.968	(A) BRAF Class 1 v12
RAD51D	17q12	21	0.96	4	0.81	5	0.97	0.948	0.971	(C) BRAF Class 3
KDM5A	12p13.33	120	5.67	29	5.98	28	5.53	0.952	0.974	(B) BRAF Class 2
FGF10	5p12	9	1.27	2	1.6	2	1.3	0.957	0.976	(B) BRAF Class 2
CCN6	6q21	17	2.51	3	2.78	3	2.19	0.957	0.976	(B) BRAF Class 2
NUP93	16q13	30	2.06	7	2.17	6	1.85	0.957	0.976	(B) BRAF Class 2
MRE11	11q21	57	2.58	12	2.41	14	2.71	0.957	0.976	(C) BRAF Class 3
SQSTM1	5q35.3	4	1.52	1	2.08	1	1.72	0.959	0.977	(B) BRAF Class 2
RPA1	17p13.3	10	1.46	2	1.28	3	1.64	0.963	0.981	(C) BRAF Class 3
RIF1	2q23.3	41	7.04	10	7.63	10	6.85	0.964	0.981	(B) BRAF Class 2
FLCN	17p11.2	60	2.46	13	2.36	13	2.28	0.966	0.982	(A) BRAF Class 1 v12
TLX3	5q35.1	14	2.39	3	2.26	3	2.04	0.969	0.984	(A) BRAF Class 1 v12
PGR	11q22.1	67	6.01	15	5.91	15	6.38	0.972	0.986	(C) BRAF Class 3
TRIM37	17q22	18	3.09	4	3.05	4	2.74	0.975	0.988	(A) BRAF Class 1 v12
TOE1	1p34.1	0	0	0	0	1	0.13	0.975	0.988	(C) BRAF Class 3
DPYD	1p21.3	4	1.62	1	2	1	1.56	0.979	0.991	(B) BRAF Class 2
GNAS	20q13.32	105	3.2	21	3.07	23	3.2	0.983	0.993	(C) BRAF Class 3
GPC3	Xq26.2	20	1.78	4	1.7	5	1.92	0.983	0.993	(C) BRAF Class 3
HIST1H3J	6p22.1	10	0.9	2	0.79	2	0.85	0.985	0.994	(A) BRAF Class 1 v12
BLM	15q26.1	107	4.4	24	4.48	24	4.29	0.988	0.995	(B) BRAF Class 2
NTHL1	16p13.3	9	0.78	2	0.71	2	0.7	0.988	0.995	(A) BRAF Class 1 v12
NUP214	9q34.13	5	3.82	1	4.35	1	4.17	0.991	0.998	(B) BRAF Class 2
RAD51C	17q22	25	1.15	6	1.21	6	1.16	0.992	0.998	(B) BRAF Class 2
HIST2H3C	1q21.2	5	0.45	1	0.39	1	0.43	0.992	0.998	(A) BRAF Class 1 v12
PRKN	6q26	79	3.29	18	3.33	19	3.39	0.993	0.998	(C) BRAF Class 3
TAP1	6p21.32	12	2.26	3	2.16	3	2.33	0.996	0.998	(C) BRAF Class 3
TAL2	9q31.2	4	0.68	1	0.75	1	0.68	0.996	0.998	(B) BRAF Class 2
MAF	16q23.2	4	0.56	1	0.6	1	0.54	0.997	0.999	(B) BRAF Class 2
IL10	1q32.1	9	0.76	2	0.74	2	0.78	0.998	0.999	(C) BRAF Class 3
BRAF	7q34	3347	100	749	100	743	100	1	1	(A) BRAF Class 1 v12

## Sheet: S3 All Cancer Class1+2
Table S3: Co-Mutations across all cancer types in BRAF Class 1 and 2
Gene	Cytoband	Class 1 Occurrence	Class 1 %	Class 2 Occurrence	Class 2 %	pvalue	qvalue	Enriched In
STK11	19p13.3	57	1.74	80	11.53	4.95e-28	5.48e-25	(B) BRAF Class 2
KRAS	12p12.1	37	1.11	67	8.83	1.44e-25	7.96e-23	(B) BRAF Class 2
NRAS	1p13.2	35	1.05	48	6.32	7.92e-16	2.93e-13	(B) BRAF Class 2
TP53	17p13.1	892	26.67	282	39.66	8.22e-12	2.28e-09	(B) BRAF Class 2
KEAP1	19p13.2	53	2.24	45	8.33	2.56e-10	5.68e-08	(B) BRAF Class 2
RNF43	17q22	260	11.71	17	3.35	3.7e-10	6.84e-08	(A) BRAF Class 1 v12
NF1	17q11.2	142	5.59	82	13.20	5.67e-10	8.98e-08	(B) BRAF Class 2
TERT	5p15.33	842	34.23	128	23.23	2.18e-07	3.025e-05	(A) BRAF Class 1 v12
FLT3	13q12.2	100	3.11	51	7.52	5.25e-07	6.47e-05	(B) BRAF Class 2
POT1	7q31.33	13	1.55	16	8.65	5.322e-06	0.0005902	(B) BRAF Class 2
ATR	3q23	126	5.72	55	10.91	4.923e-05	0.004963	(B) BRAF Class 2
FGFR1	8p11.23	55	1.65	30	3.95	0.0001606	0.0148	(B) BRAF Class 2
CBLB	3q13.11	16	1.52	14	6.19	0.0001945	0.0166	(B) BRAF Class 2
TGFBR2	3p24.1	112	7.16	9	2.48	0.0002489	0.0197	(A) BRAF Class 1 v12
NFE2L2	2q31.2	31	1.22	20	3.50	0.0003631	0.0268	(B) BRAF Class 2
FOXA1	14q21.1	39	1.98	23	5.12	0.0003989	0.0277	(B) BRAF Class 2
COL2A1	12q13.11	5	3.21	7	25.00	0.000428	0.0279	(B) BRAF Class 2
CDKN1C	11p15.4	5	0.51	8	3.76	0.0005062	0.0296	(B) BRAF Class 2
KDR	4q12	163	5.12	58	8.61	0.0005075	0.0296	(B) BRAF Class 2
KDM6A	Xp11.3	65	2.65	31	5.54	0.0007429	0.0412	(B) BRAF Class 2
FANCL	2p16.1	16	1.26	12	4.62	0.001061	0.056	(B) BRAF Class 2
CASP8	2q33.1	91	4.47	8	1.66	0.00165	0.0832	(A) BRAF Class 1 v12
SPTA1	1q23.1	95	15.13	28	28.00	0.001855	0.0873	(B) BRAF Class 2
EPHA3	3p11.1	91	4.80	37	8.62	0.002011	0.0873	(B) BRAF Class 2
HRAS	11p15.5	18	0.54	13	1.72	0.00202	0.0873	(B) BRAF Class 2
ERBB4	2q34	205	6.33	70	9.49	0.002047	0.0873	(B) BRAF Class 2
DGKH	13q14.11	0	0.00	3	21.43	0.002251	0.09	(B) BRAF Class 2
MSH3	5q14.1	94	8.83	8	3.43	0.002273	0.09	(A) BRAF Class 1 v12
ERBB2	17q12	88	2.64	36	4.74	0.002548	0.0974	(B) BRAF Class 2
GNA14	9q21.2	0	0.00	3	18.75	0.002743	0.101	(B) BRAF Class 2
EPHA7	6q16.1	108	6.10	40	10.28	0.003194	0.112	(B) BRAF Class 2
PRKACA	19p13.12	0	0.00	3	7.69	0.00323	0.112	(B) BRAF Class 2
NOTCH2	1p12	109	4.37	41	7.32	0.003483	0.117	(B) BRAF Class 2
MPL	1p34.2	52	1.66	23	3.44	0.003619	0.118	(B) BRAF Class 2
SMC1A	Xp11.22	9	1.00	7	4.58	0.004332	0.135	(B) BRAF Class 2
CDKN2A	9p21.3	449	13.71	123	17.72	0.004378	0.135	(B) BRAF Class 2
SYNE1	6q25.2	11	2.14	7	8.97	0.005078	0.152	(B) BRAF Class 2
GATA6	18q11.2	28	1.98	14	4.86	0.006535	0.191	(B) BRAF Class 2
PTPN11	12q24.13	36	1.11	17	2.46	0.007012	0.195	(B) BRAF Class 2
MET	7q31.2	120	3.62	43	5.72	0.007045	0.195	(B) BRAF Class 2
NEIL3	4q34.3	23	3.95	0	0.00	0.008157	0.218	(A) BRAF Class 1 v12
OR5L1	11q12.1	1	1.16	3	21.43	0.008238	0.218	(B) BRAF Class 2
RSPO2	8q23.1	12	1.35	9	4.35	0.009081	0.225	(B) BRAF Class 2
ARID1A	1p36.11	268	10.57	81	14.21	0.009122	0.225	(B) BRAF Class 2
PTPRB	12q15	8	5.13	6	21.43	0.009237	0.225	(B) BRAF Class 2
CXCR4	2q22.1	12	0.63	9	2.05	0.009345	0.225	(B) BRAF Class 2
DDX31	9q34.13	1	1.09	3	18.75	0.009953	0.235	(B) BRAF Class 2
CIITA	16p13.13	48	4.82	20	9.26	0.011	0.254	(B) BRAF Class 2
KEL	7q34	30	5.73	12	13.19	0.0129	0.279	(B) BRAF Class 2
IRF4	6p25.3	21	1.34	12	3.31	0.013	0.279	(B) BRAF Class 2
FANCF	11p14.3	10	0.63	7	2.25	0.0131	0.279	(B) BRAF Class 2
SETBP1	18q12.3	103	7.02	32	11.19	0.0133	0.279	(B) BRAF Class 2
HIST1H3B	6p22.2	19	0.91	11	2.34	0.0137	0.279	(B) BRAF Class 2
POLD1	19q13.33	132	6.42	18	3.76	0.0139	0.279	(A) BRAF Class 1 v12
PLCB4	20p12.3-p12.2	5	2.29	5	11.36	0.0141	0.279	(B) BRAF Class 2
SF3B1	2q33.1	60	2.28	24	4.04	0.0144	0.279	(B) BRAF Class 2
RAF1	3p25.2	37	1.42	18	2.83	0.0145	0.279	(B) BRAF Class 2
XRCC3	14q32.33	20	2.92	0	0.00	0.0146	0.279	(A) BRAF Class 1 v12
PDGFRA	4q12	102	3.14	36	4.88	0.0153	0.283	(B) BRAF Class 2
MAP2K1	15q22.31	72	2.67	29	4.43	0.0154	0.283	(B) BRAF Class 2
ELF3	1q32.1	10	1.52	8	4.82	0.0157	0.283	(B) BRAF Class 2
HLA-B	6p21.33	25	4.11	1	0.62	0.0159	0.283	(A) BRAF Class 1 v12
NOTCH1	9q34.3	177	5.39	53	7.63	0.0161	0.283	(B) BRAF Class 2
PDGFRB	5q32	93	3.67	33	5.79	0.0166	0.288	(B) BRAF Class 2
SRC	20q11.23	22	0.83	11	2.01	0.0173	0.291	(B) BRAF Class 2
ESR2	14q23.2-q23.3	1	0.39	3	5.56	0.0173	0.291	(B) BRAF Class 2
QKI	6q26	48	3.62	3	1.12	0.0183	0.3	(A) BRAF Class 1 v12
IL2RB	22q12.3	0	0.00	2	14.29	0.0184	0.3	(B) BRAF Class 2
ZNRF3	22q12.1	42	6.01	3	1.86	0.0187	0.301	(A) BRAF Class 1 v12
JAK3	19p13.11	101	3.15	35	4.82	0.0199	0.311	(B) BRAF Class 2
DCLRE1C	10p13	7	1.20	6	4.51	0.0202	0.311	(B) BRAF Class 2
HLA-A	6p22.1	48	3.96	4	1.42	0.0203	0.311	(A) BRAF Class 1 v12
NCKAP5	2q21.2	5	5.81	4	28.57	0.0207	0.311	(B) BRAF Class 2
PBRM1	3p21.1	108	4.56	37	6.85	0.021	0.311	(B) BRAF Class 2
PPARG	3p25.2	40	2.26	17	4.31	0.021	0.311	(B) BRAF Class 2
FGFR2	10q26.13	87	2.60	31	4.08	0.0218	0.312	(B) BRAF Class 2
B2M	15q21.1	86	3.97	10	2.04	0.0218	0.312	(A) BRAF Class 1 v12
NTRK2	9q21.33	53	2.10	21	3.68	0.0222	0.312	(B) BRAF Class 2
DROSHA	5p13.3	24	4.03	1	0.65	0.0222	0.312	(A) BRAF Class 1 v12
SPRED1	15q14	11	1.67	8	4.82	0.0225	0.312	(B) BRAF Class 2
HIF1A	14q23.2	0	0.00	2	4.35	0.0231	0.312	(B) BRAF Class 2
CD79B	17q23.3	15	0.61	9	1.61	0.0232	0.312	(B) BRAF Class 2
CREB1	2q33.3	0	0.00	2	4.26	0.0236	0.312	(B) BRAF Class 2
H3F3B	17q25.1	5	0.27	5	1.18	0.0237	0.312	(B) BRAF Class 2
ZFHX4	8q21.13	18	11.54	8	28.57	0.0241	0.314	(B) BRAF Class 2
RARA	17q21.2	43	1.75	18	3.21	0.0244	0.315	(B) BRAF Class 2
FGF6	12p13.32	10	1.41	6	4.65	0.0254	0.32	(B) BRAF Class 2
EZH2	7q36.1	46	1.52	18	2.77	0.0254	0.32	(B) BRAF Class 2
LATS1	6q25.1	24	2.04	12	4.40	0.0262	0.326	(B) BRAF Class 2
DDR2	1q23.3	56	2.10	23	3.53	0.027	0.326	(B) BRAF Class 2
STAT6	12q13.3	17	1.51	9	3.75	0.0272	0.326	(B) BRAF Class 2
PRKCA	17q24.2	0	0.00	2	4.17	0.0273	0.326	(B) BRAF Class 2
RUNX1T1	8q21.3	56	4.49	19	7.79	0.0274	0.326	(B) BRAF Class 2
ANKRD26	10p12.1	45	13.51	1	2.50	0.0278	0.328	(A) BRAF Class 1 v12
SMARCA2	9p24.3	2	1.20	3	9.68	0.0285	0.333	(B) BRAF Class 2
BAP1	3p21.1	62	2.45	23	4.03	0.0296	0.341	(B) BRAF Class 2
EPHA5	4q13.1-q13.2	89	4.79	30	7.28	0.03	0.343	(B) BRAF Class 2
PTPRK	6q22.33	19	12.18	8	28.57	0.0305	0.345	(B) BRAF Class 2
BRIP1	17q23.2	65	2.65	24	4.29	0.0308	0.345	(B) BRAF Class 2
CDK12	17q12	72	3.27	26	5.16	0.0312	0.345	(B) BRAF Class 2
ERBB3	12q13.2	81	3.15	30	4.82	0.0314	0.345	(B) BRAF Class 2
RRAS2	11p15.2	3	0.45	4	2.41	0.0333	0.362	(B) BRAF Class 2
USP28	11q23.2	20	3.43	10	7.52	0.036	0.387	(B) BRAF Class 2
RAD54B	8q22.1	17	2.92	9	6.77	0.0363	0.387	(B) BRAF Class 2
PDK1	2q31.1	8	1.13	5	3.88	0.0367	0.387	(B) BRAF Class 2
AURKA	20q13.2	26	1.06	12	2.14	0.037	0.387	(B) BRAF Class 2
IDH1	2q34	81	2.43	28	3.69	0.0376	0.39	(B) BRAF Class 2
KMT2C	7q36.1	184	12.67	30	9.06	0.0389	0.396	(A) BRAF Class 1 v12
CD74	5q33.1	3	0.65	3	3.95	0.0389	0.396	(B) BRAF Class 2
MAGI2	7q21.11	38	7.69	11	14.86	0.0402	0.397	(B) BRAF Class 2
SOX10	22q13.1	13	1.92	6	5.36	0.0403	0.397	(B) BRAF Class 2
SOX17	8q11.23	55	4.67	6	2.20	0.0406	0.397	(A) BRAF Class 1 v12
NTRK1	1q23.1	101	3.89	33	5.63	0.0407	0.397	(B) BRAF Class 2
CASR	3q13.33-q21.1	3	3.26	3	18.75	0.0409	0.397	(B) BRAF Class 2
NKX3-1	8p21.2	17	0.98	9	2.23	0.0417	0.397	(B) BRAF Class 2
ATM	11q22.3	257	8.08	69	10.24	0.042	0.397	(B) BRAF Class 2
GSK3B	3q13.33	17	1.09	9	2.48	0.042	0.397	(B) BRAF Class 2
BCL11B	14q32.2	31	4.45	13	8.33	0.0431	0.397	(B) BRAF Class 2
DUSP4	8p12	8	1.21	6	3.61	0.0434	0.397	(B) BRAF Class 2
CCNE1	19q12	44	1.74	17	2.98	0.0438	0.397	(B) BRAF Class 2
CTNNA1	5q31.2	27	2.12	11	4.23	0.044	0.397	(B) BRAF Class 2
MBD4	3q21.3	15	2.57	0	0.00	0.0443	0.397	(A) BRAF Class 1 v12
SERPINA1	14q32.13	15	2.57	0	0.00	0.0443	0.397	(A) BRAF Class 1 v12
SMARCA4	19p13.2	160	6.31	48	8.42	0.0448	0.397	(B) BRAF Class 2
NTRK3	15q25.3	110	4.34	35	6.14	0.045	0.397	(B) BRAF Class 2
FGF19	11q13.3	24	1.47	11	2.95	0.0457	0.397	(B) BRAF Class 2
CSDE1	1p13.2	10	1.19	6	3.37	0.0458	0.397	(B) BRAF Class 2
BRD4	19p13.12	126	5.24	19	3.45	0.0459	0.397	(A) BRAF Class 1 v12
ELANE	19p13.3	15	2.30	0	0.00	0.0462	0.397	(A) BRAF Class 1 v12
FBXW7	4q31.3	186	5.67	28	4.03	0.0466	0.397	(A) BRAF Class 1 v12
GALNT12	9q22.33	12	1.63	7	4.14	0.0472	0.4	(B) BRAF Class 2
ANKRD11	16q24.3	87	7.85	12	4.71	0.0486	0.408	(A) BRAF Class 1 v12
NIPBL	5p13.2	6	3.64	4	13.33	0.0494	0.412	(B) BRAF Class 2
NSD3	8p11.23	30	2.67	14	4.83	0.0503	0.414	(B) BRAF Class 2
ESPL1	12q13.13	1	1.16	2	14.29	0.0506	0.414	(B) BRAF Class 2
MLH1	3p22.2	52	1.62	18	2.65	0.051	0.414	(B) BRAF Class 2
PKHD1	6p12.3-p12.2	1	0.85	2	10.53	0.0512	0.414	(B) BRAF Class 2
NCOA2	8q13.3	6	2.34	4	8.51	0.0526	0.422	(B) BRAF Class 2
SLIT2	4p15.31	52	8.28	14	14.00	0.0535	0.427	(B) BRAF Class 2
KLLN	10q23.31	14	2.40	0	0.00	0.0547	0.433	(A) BRAF Class 1 v12
ZNF708	19p12	3	0.85	3	4.41	0.0561	0.438	(B) BRAF Class 2
TYK2	19p13.2	6	2.41	4	8.51	0.0567	0.438	(B) BRAF Class 2
BEND2	Xp22.13	1	1.09	2	12.50	0.0568	0.438	(B) BRAF Class 2
CDKN2B	9p21.3	208	8.22	59	10.42	0.0569	0.438	(B) BRAF Class 2
TBX3	12q24.21	69	4.53	24	6.76	0.0573	0.439	(B) BRAF Class 2
FGF14	13q33.1	13	1.84	6	4.65	0.0579	0.439	(B) BRAF Class 2
RSPO3	6q22.33	20	2.56	9	5.29	0.0582	0.439	(B) BRAF Class 2
FGF8	10q24.32	2	0.60	2	5.00	0.0586	0.439	(B) BRAF Class 2
GLI2	2q14.2	80	7.63	25	11.11	0.0598	0.444	(B) BRAF Class 2
RICTOR	5p13.1	74	3.37	25	4.96	0.0601	0.444	(B) BRAF Class 2
RHPN2	19q13.11	6	1.70	4	5.88	0.0609	0.445	(B) BRAF Class 2
IPMK	10q21.1	1	0.64	2	7.14	0.0609	0.445	(B) BRAF Class 2
E2F3	6p22.3	10	0.85	6	2.20	0.0627	0.454	(B) BRAF Class 2
PDGFB	22q13.1	1	0.39	2	4.26	0.0638	0.454	(B) BRAF Class 2
TCF12	15q21.3	1	0.50	2	5.41	0.0638	0.454	(B) BRAF Class 2
DCC	18q21.2	14	5.58	6	13.33	0.0642	0.454	(B) BRAF Class 2
RASA1	5q14.3	39	2.08	15	3.49	0.0643	0.454	(B) BRAF Class 2
GLI1	12q13.3	114	4.97	17	3.32	0.0651	0.456	(A) BRAF Class 1 v12
EBF1	5q33.3	1	0.44	2	4.76	0.0654	0.456	(B) BRAF Class 2
TRAF3	14q32.32	14	1.73	7	3.93	0.0666	0.462	(B) BRAF Class 2
TEK	9p21.2	33	4.65	15	7.77	0.0672	0.462	(B) BRAF Class 2
PNKP	19q13.33	13	2.23	0	0.00	0.0674	0.462	(A) BRAF Class 1 v12
AURKB	17p13.1	23	0.94	10	1.79	0.0702	0.477	(B) BRAF Class 2
MSH6	2p16.3	139	5.41	22	3.83	0.0709	0.477	(A) BRAF Class 1 v12
KIT	4q12	80	2.39	26	3.43	0.0712	0.477	(B) BRAF Class 2
LIFR	5p13.1	4	2.15	3	9.09	0.0714	0.477	(B) BRAF Class 2
H3F3A	1q42.12	14	0.56	7	1.26	0.074	0.491	(B) BRAF Class 2
SPOP	17q21.33	20	0.91	9	1.78	0.0757	0.494	(B) BRAF Class 2
MCM8	20p12.3	14	2.40	7	5.26	0.0757	0.494	(B) BRAF Class 2
SOX2	3q26.33	33	1.34	3	0.53	0.076	0.494	(A) BRAF Class 1 v12
FOXP1	3p13	34	2.26	13	3.81	0.0771	0.494	(B) BRAF Class 2
HIST3H3	1q42.13	8	0.72	5	1.96	0.0773	0.494	(B) BRAF Class 2
COL1A1	17q21.33	4	1.56	3	6.38	0.0779	0.494	(B) BRAF Class 2
PAK5	20p12.2	79	6.16	26	8.67	0.078	0.494	(B) BRAF Class 2
HGF	7q21.11	61	3.92	21	5.79	0.078	0.494	(B) BRAF Class 2
TNFRSF14	1p36.32	17	1.09	8	2.22	0.0795	0.499	(B) BRAF Class 2
PRPF40B	12q13.12	10	2.31	5	5.95	0.0797	0.499	(B) BRAF Class 2
FANCA	16q24.3	90	3.55	28	4.91	0.0814	0.507	(B) BRAF Class 2
DNMT3A	2p23.3	127	5.11	38	6.69	0.0833	0.516	(B) BRAF Class 2
MT-ND5	-	12	0.36	0	0.00	0.0856	0.527	(A) BRAF Class 1 v12
TFRC	3q29	7	2.07	3	7.14	0.0868	0.53	(B) BRAF Class 2
PRAME	22q11.22	4	1.13	3	4.41	0.087	0.53	(B) BRAF Class 2
PALB2	16p12.2	87	3.43	27	4.74	0.0876	0.531	(B) BRAF Class 2
NAV3	12q21.2	8	5.13	4	14.29	0.0892	0.538	(B) BRAF Class 2
PTEN	10q23.31	350	10.47	62	8.72	0.0899	0.538	(A) BRAF Class 1 v12
RPS6KB2	11q13.2	21	1.78	9	3.30	0.0937	0.538	(B) BRAF Class 2
ZFHX3	16q22.2-q22.3	152	12.24	26	9.25	0.0939	0.538	(A) BRAF Class 1 v12
PRKDC	8q11.21	170	10.79	42	13.59	0.0939	0.538	(B) BRAF Class 2
ARID2	12q12	180	7.42	50	9.21	0.0951	0.538	(B) BRAF Class 2
U2AF1	21q22.3	39	1.55	14	2.46	0.0952	0.538	(B) BRAF Class 2
HFE	6p22.2	6	1.03	4	3.01	0.0957	0.538	(B) BRAF Class 2
INHBA	7p14.1	43	2.96	15	4.59	0.0959	0.538	(B) BRAF Class 2
BRCA2	13q13.1	203	8.01	36	6.30	0.096	0.538	(A) BRAF Class 1 v12
SF1	11q13.1	13	3.01	0	0.00	0.0963	0.538	(A) BRAF Class 1 v12
TRAF2	9q34.3	25	2.13	2	0.75	0.0969	0.538	(A) BRAF Class 1 v12
CDKN1A	6p21.2	15	0.63	7	1.28	0.0975	0.538	(B) BRAF Class 2
CHEK2	22q12.1	60	2.37	8	1.40	0.0983	0.538	(A) BRAF Class 1 v12
HIST1H3I	6p22.1	6	0.54	4	1.57	0.0985	0.538	(B) BRAF Class 2
ITK	5q33.3	12	2.01	6	4.38	0.0998	0.538	(B) BRAF Class 2
BCL2	18q21.33	12	0.49	6	1.08	0.1	0.538	(B) BRAF Class 2
SDHD	11q23.1	9	0.37	5	0.90	0.1	0.538	(B) BRAF Class 2
IRS1	2q36.3	63	5.35	9	3.30	0.101	0.538	(A) BRAF Class 1 v12
NOTCH3	19p13.12	219	10.01	40	8.03	0.101	0.538	(A) BRAF Class 1 v12
FLI1	11q24.3	7	1.64	3	5.26	0.101	0.538	(B) BRAF Class 2
KAT6A	8p11.21	68	5.42	19	7.76	0.103	0.538	(B) BRAF Class 2
SMARCD1	12q13.12	24	1.87	2	0.67	0.103	0.538	(A) BRAF Class 1 v12
SMAD2	18q21.1	42	1.71	5	0.89	0.106	0.538	(A) BRAF Class 1 v12
ERCC2	19q13.32	75	3.02	23	4.17	0.107	0.538	(B) BRAF Class 2
NKX2-1-AS1	14q13.3	0	0.00	1	2.50	0.107	0.538	(B) BRAF Class 2
RASA2	3q23	2	0.91	2	5.13	0.11	0.538	(B) BRAF Class 2
TTYH1	19q13.42	2	1.28	2	7.14	0.11	0.538	(B) BRAF Class 2
DDR1	6p21.33	3	1.46	3	5.45	0.111	0.538	(B) BRAF Class 2
IKBKE	1q32.1	22	1.41	9	2.48	0.112	0.538	(B) BRAF Class 2
NR4A3	9q31.1	2	1.25	2	6.90	0.112	0.538	(B) BRAF Class 2
SYK	9q22.2	44	2.33	15	3.50	0.113	0.538	(B) BRAF Class 2
PTP4A1	6q12	1	0.19	2	1.43	0.114	0.538	(B) BRAF Class 2
XPO1	2p15	48	1.89	16	2.80	0.114	0.538	(B) BRAF Class 2
USP6	17p13.2	2	1.18	2	6.45	0.114	0.538	(B) BRAF Class 2
PPP4R2	3p13	8	1.52	5	3.57	0.116	0.538	(B) BRAF Class 2
BTG1	12q21.33	2	0.30	2	1.63	0.116	0.538	(B) BRAF Class 2
AXIN1	16p13.3	56	3.70	8	2.26	0.116	0.538	(A) BRAF Class 1 v12
RUNX1	21q22.12	68	2.73	21	3.79	0.117	0.538	(B) BRAF Class 2
NSD2	4p16.3	44	3.24	16	4.78	0.118	0.538	(B) BRAF Class 2
CNOT3	19q13.42	2	1.18	2	6.25	0.119	0.538	(B) BRAF Class 2
TOPBP1	3q22.1	23	3.89	9	6.67	0.12	0.538	(B) BRAF Class 2
TET2	4q24	156	6.28	44	7.75	0.12	0.538	(B) BRAF Class 2
JAK2	9p24.1	63	1.98	20	2.77	0.121	0.538	(B) BRAF Class 2
KLHL6	3q27.1	21	2.93	1	0.76	0.122	0.538	(A) BRAF Class 1 v12
RINT1	7q22.3	13	2.23	6	4.51	0.122	0.538	(B) BRAF Class 2
PRKCZ	1p36.33	5	1.42	3	4.41	0.123	0.538	(B) BRAF Class 2
FGF23	12p13.32	9	1.27	4	3.10	0.126	0.538	(B) BRAF Class 2
HIST1H3H	6p22.1	4	0.36	3	1.18	0.126	0.538	(B) BRAF Class 2
DMC1	22q13.1	10	1.72	0	0.00	0.126	0.538	(A) BRAF Class 1 v12
CIC	19q13.2	149	7.01	27	5.47	0.127	0.538	(A) BRAF Class 1 v12
PNRC1	6q15	17	1.05	1	0.27	0.127	0.538	(A) BRAF Class 1 v12
SLC25A13	7q21.3	10	1.72	5	3.76	0.127	0.538	(B) BRAF Class 2
RAD50	5q31.1	94	4.32	15	3.08	0.129	0.538	(A) BRAF Class 1 v12
ETS1	11q24.3	7	1.24	3	3.57	0.129	0.538	(B) BRAF Class 2
PRSS1	7q34	20	2.74	8	4.82	0.129	0.538	(B) BRAF Class 2
MAP3K4	6q26	30	9.01	1	2.50	0.129	0.538	(A) BRAF Class 1 v12
PCM1	8p22	0	0.00	1	25.00	0.129	0.538	(B) BRAF Class 2
ADGRL3	4q13.1	0	0.00	1	12.50	0.129	0.538	(B) BRAF Class 2
AKT1	14q32.33	108	3.23	18	2.37	0.129	0.538	(A) BRAF Class 1 v12
GBA	1q22	7	1.20	4	3.01	0.129	0.538	(B) BRAF Class 2
SDHB	1p36.13	10	0.41	5	0.90	0.129	0.538	(B) BRAF Class 2
TOP2A	17q21.2	32	5.10	2	2.00	0.13	0.538	(A) BRAF Class 1 v12
FLT1	13q12.3	130	5.29	37	6.61	0.131	0.538	(B) BRAF Class 2
AXL	19q13.2	96	3.79	28	4.91	0.132	0.538	(B) BRAF Class 2
PDCD1	2q37.3	33	2.57	4	1.31	0.132	0.538	(A) BRAF Class 1 v12
CHEK1	11q24.2	27	1.23	10	1.98	0.134	0.538	(B) BRAF Class 2
EML4	2p21	13	3.00	4	6.78	0.134	0.538	(B) BRAF Class 2
PTCH1	9q22.32	133	5.25	23	4.03	0.135	0.538	(A) BRAF Class 1 v12
SERPINB4	18q21.33	0	0.00	1	20.00	0.135	0.538	(B) BRAF Class 2
SDHA	5p15.33	71	3.12	11	2.10	0.135	0.538	(A) BRAF Class 1 v12
SH2B3	12q24.12	62	2.65	9	1.71	0.135	0.538	(A) BRAF Class 1 v12
EXT2	11p11.2	18	1.76	7	3.18	0.137	0.538	(B) BRAF Class 2
BCL2L12	19q13.33	11	1.12	5	2.37	0.138	0.538	(B) BRAF Class 2
FZR1	19p13.3	0	0.00	1	5.26	0.14	0.538	(B) BRAF Class 2
LTF	3p21.31	0	0.00	1	5.26	0.14	0.538	(B) BRAF Class 2
SOX11	2p25.2	0	0.00	1	5.26	0.14	0.538	(B) BRAF Class 2
MALT1	18q21.32	17	1.40	7	2.54	0.14	0.538	(B) BRAF Class 2
CAD	2p23.3	0	0.00	1	7.14	0.14	0.538	(B) BRAF Class 2
CPS1	2q34	0	0.00	1	7.14	0.14	0.538	(B) BRAF Class 2
EDNRB	13q22.3	0	0.00	1	7.14	0.14	0.538	(B) BRAF Class 2
HSPA2	14q23.3	0	0.00	1	7.14	0.14	0.538	(B) BRAF Class 2
INPP5D	2q37.1	0	0.00	1	7.14	0.14	0.538	(B) BRAF Class 2
MEF2C	5q14.3	0	0.00	1	7.14	0.14	0.538	(B) BRAF Class 2
MKI67	10q26.2	0	0.00	1	7.14	0.14	0.538	(B) BRAF Class 2
PRKCH	14q23.1	0	0.00	1	7.14	0.14	0.538	(B) BRAF Class 2
PTPN6	12p13.31	0	0.00	1	7.14	0.14	0.538	(B) BRAF Class 2
TNFRSF11A	18q21.33	0	0.00	1	7.14	0.14	0.538	(B) BRAF Class 2
TRIM28	19q13.43	0	0.00	1	7.14	0.14	0.538	(B) BRAF Class 2
WDR90	16p13.3	0	0.00	1	7.14	0.14	0.538	(B) BRAF Class 2
NF2	22q12.2	58	2.26	18	3.13	0.14	0.538	(B) BRAF Class 2
PAX5	9p13.2	53	2.13	17	2.99	0.141	0.538	(B) BRAF Class 2
HDAC9	7p21.1	3	3.49	2	14.29	0.143	0.538	(B) BRAF Class 2
PLCG1	20q12	0	0.00	1	5.00	0.143	0.538	(B) BRAF Class 2
BOD1L1	4p15.33	0	0.00	1	12.50	0.143	0.538	(B) BRAF Class 2
JARID2	6p22.3	0	0.00	1	6.67	0.144	0.538	(B) BRAF Class 2
ICK	6p12.1	0	0.00	1	5.00	0.145	0.538	(B) BRAF Class 2
HABP2	10q25.3	16	2.74	1	0.75	0.145	0.538	(A) BRAF Class 1 v12
PIM1	6p21.2	17	0.77	7	1.38	0.146	0.538	(B) BRAF Class 2
AKAP9	7q21.2	0	0.00	1	4.76	0.147	0.538	(B) BRAF Class 2
PBX1	1q23.3	0	0.00	1	4.76	0.147	0.538	(B) BRAF Class 2
TRIP11	14q32.12	0	0.00	1	4.76	0.147	0.538	(B) BRAF Class 2
POLE	12q24.33	162	7.33	30	5.89	0.147	0.538	(A) BRAF Class 1 v12
ACVR1B	12q13.13	10	1.52	4	3.42	0.147	0.538	(B) BRAF Class 2
RHEB	7q36.1	11	0.52	5	1.07	0.148	0.538	(B) BRAF Class 2
HTRA1	10q26.13	0	0.00	1	6.25	0.148	0.538	(B) BRAF Class 2
SOX9	17q24.3	110	4.59	19	3.47	0.149	0.538	(A) BRAF Class 1 v12
EXO1	1q43	14	2.40	6	4.51	0.149	0.538	(B) BRAF Class 2
SHOC2	10q25.2	8	1.52	0	0.00	0.15	0.538	(A) BRAF Class 1 v12
COL7A1	3p21.31	94	16.12	27	20.30	0.151	0.538	(B) BRAF Class 2
SHQ1	3p13	24	2.04	9	3.30	0.151	0.538	(B) BRAF Class 2
ASH2L	8p11.23	0	0.00	1	3.57	0.152	0.538	(B) BRAF Class 2
CRCT1	1q21.3	0	0.00	1	3.57	0.152	0.538	(B) BRAF Class 2
MAP3K5	6q23.3	0	0.00	1	3.57	0.152	0.538	(B) BRAF Class 2
DNM2	19p13.2	0	0.00	1	5.56	0.153	0.538	(B) BRAF Class 2
STAG2	Xq25	73	2.98	22	3.93	0.153	0.538	(B) BRAF Class 2
SS18	18q11.2	8	1.01	4	2.30	0.153	0.538	(B) BRAF Class 2
TERC	3q26.2	0	0.00	1	0.73	0.153	0.538	(B) BRAF Class 2
SETD2	3p21.31	223	8.80	42	7.37	0.154	0.538	(A) BRAF Class 1 v12
MEF2B	19p13.11	28	1.14	10	1.79	0.154	0.538	(B) BRAF Class 2
LEF1	4q25	0	0.00	1	2.50	0.154	0.538	(B) BRAF Class 2
KDM5C	Xp11.22	81	3.42	24	4.44	0.154	0.538	(B) BRAF Class 2
MST1	3p21.31	9	0.81	0	0.00	0.154	0.538	(A) BRAF Class 1 v12
MN1	22q12.1	0	0.00	1	2.86	0.154	0.538	(B) BRAF Class 2
HIST1H1E	6p22.2	0	0.00	1	4.76	0.154	0.538	(B) BRAF Class 2
RPTOR	17q25.3	87	4.11	26	5.26	0.155	0.538	(B) BRAF Class 2
MAP2K2	19p13.3	32	1.45	12	2.17	0.155	0.538	(B) BRAF Class 2
NIN	14q22.1	3	2.46	2	9.52	0.156	0.538	(B) BRAF Class 2
CARD11	7p22.2	157	6.39	43	7.68	0.156	0.538	(B) BRAF Class 2
NRG1	8p12	52	5.06	14	7.14	0.156	0.538	(B) BRAF Class 2
KMT2A	11q23.3	214	8.62	57	10.05	0.158	0.538	(B) BRAF Class 2
PGBD3	10q11.23	11	0.33	5	0.66	0.159	0.538	(B) BRAF Class 2
PIK3CD	1p36.22	38	2.99	5	1.72	0.161	0.538	(A) BRAF Class 1 v12
IDH2	15q26.1	48	1.51	7	0.95	0.164	0.538	(A) BRAF Class 1 v12
EPHA2	1p36.13	0	0.00	1	2.38	0.164	0.538	(B) BRAF Class 2
ARHGEF12	11q23.3	25	4.25	9	6.67	0.165	0.538	(B) BRAF Class 2
GREM1	15q13.3	11	0.56	5	1.11	0.165	0.538	(B) BRAF Class 2
EGFL7	9q34.3	15	1.27	1	0.37	0.166	0.538	(A) BRAF Class 1 v12
BABAM1	19p13.11	14	1.29	1	0.37	0.167	0.538	(A) BRAF Class 1 v12
CRKL	22q11.21	18	0.73	7	1.25	0.167	0.538	(B) BRAF Class 2
SOS2	14q21.3	3	1.92	2	7.14	0.167	0.538	(B) BRAF Class 2
NECTIN4	1q23.3	8	1.37	4	3.01	0.167	0.538	(B) BRAF Class 2
NT5C2	10q24.32-q24.33	11	1.33	5	2.59	0.168	0.538	(B) BRAF Class 2
HOXB13	17q21.32	18	0.94	7	1.59	0.171	0.538	(B) BRAF Class 2
MYCL	1p34.2	33	1.30	11	1.93	0.172	0.538	(B) BRAF Class 2
EGLN1	1q42.2	5	0.86	3	2.26	0.172	0.538	(B) BRAF Class 2
INPP4B	4q31.21	32	2.08	11	3.07	0.174	0.538	(B) BRAF Class 2
DIS3	13q21.33	70	2.96	21	3.85	0.174	0.538	(B) BRAF Class 2
RYBP	3p13	8	0.68	4	1.47	0.174	0.538	(B) BRAF Class 2
CTNNB1	3p22.1	115	3.44	32	4.22	0.175	0.538	(B) BRAF Class 2
PTPRS	19p13.3	110	9.35	20	7.33	0.176	0.538	(A) BRAF Class 1 v12
MST1R	3p21.31	46	3.58	15	4.92	0.176	0.538	(B) BRAF Class 2
STAT5B	17q21.2	37	3.11	5	1.84	0.177	0.538	(A) BRAF Class 1 v12
FAN1	15q13.3	15	2.57	6	4.51	0.178	0.538	(B) BRAF Class 2
PRPF8	17p13.3	14	3.24	5	5.95	0.182	0.538	(B) BRAF Class 2
EMSY	11q13.5	15	2.12	5	3.88	0.182	0.538	(B) BRAF Class 2
CHD4	12p13.31	38	6.05	9	9.00	0.182	0.538	(B) BRAF Class 2
ADGRV1	5q14.3	0	0.00	1	0.13	0.185	0.538	(B) BRAF Class 2
ALG10	12p11.1	0	0.00	1	0.13	0.185	0.538	(B) BRAF Class 2
C5ORF22	5p13.3	0	0.00	1	0.13	0.185	0.538	(B) BRAF Class 2
CALB1	8q21.3	0	0.00	1	0.13	0.185	0.538	(B) BRAF Class 2
CAMKMT	2p21	0	0.00	1	0.13	0.185	0.538	(B) BRAF Class 2
CRLF3	17q11.2	0	0.00	1	0.13	0.185	0.538	(B) BRAF Class 2
FAM124B	2q36.2	0	0.00	1	0.13	0.185	0.538	(B) BRAF Class 2
HEXIM2	17q21.31	0	0.00	1	0.13	0.185	0.538	(B) BRAF Class 2
IGHD2-2	14q32.33	0	0.00	1	0.13	0.185	0.538	(B) BRAF Class 2
IRX3	16q12.2	0	0.00	1	0.13	0.185	0.538	(B) BRAF Class 2
KCNAB1	3q25.31	0	0.00	1	0.13	0.185	0.538	(B) BRAF Class 2
KCNJ1	11q24.3	0	0.00	1	0.13	0.185	0.538	(B) BRAF Class 2
KYNU	2q22.2	0	0.00	1	0.13	0.185	0.538	(B) BRAF Class 2
LAMC3	9q34.12	0	0.00	1	0.13	0.185	0.538	(B) BRAF Class 2
LGALS17A	19q13.2	0	0.00	1	0.13	0.185	0.538	(B) BRAF Class 2
LILRB1	19q13.42	0	0.00	1	0.13	0.185	0.538	(B) BRAF Class 2
LINC00484	9q22.2	0	0.00	1	0.13	0.185	0.538	(B) BRAF Class 2
LINC02544	6q27	0	0.00	1	0.13	0.185	0.538	(B) BRAF Class 2
MTMR3	22q12.2	0	0.00	1	0.13	0.185	0.538	(B) BRAF Class 2
NBPF1	1p36.13	0	0.00	1	0.13	0.185	0.538	(B) BRAF Class 2
NUFIP1	13q14.12	0	0.00	1	0.13	0.185	0.538	(B) BRAF Class 2
PAXIP1-AS2	7q36.2	0	0.00	1	0.13	0.185	0.538	(B) BRAF Class 2
PEX5	12p13.31	0	0.00	1	0.13	0.185	0.538	(B) BRAF Class 2
PRAG1	8p23.1	0	0.00	1	0.13	0.185	0.538	(B) BRAF Class 2
PXMP2	12q24.33	0	0.00	1	0.13	0.185	0.538	(B) BRAF Class 2
RERE	1p36.23	0	0.00	1	0.13	0.185	0.538	(B) BRAF Class 2
ROCK1	18q11.1	0	0.00	1	0.13	0.185	0.538	(B) BRAF Class 2
RUNX3	1p36.11	0	0.00	1	0.13	0.185	0.538	(B) BRAF Class 2
SBF1P1	8q12.1	0	0.00	1	0.13	0.185	0.538	(B) BRAF Class 2
SEC24B-AS1	4q25	0	0.00	1	0.13	0.185	0.538	(B) BRAF Class 2
SELENOI	2p23.3	0	0.00	1	0.13	0.185	0.538	(B) BRAF Class 2
ST7	7q31.2	0	0.00	1	0.13	0.185	0.538	(B) BRAF Class 2
TECRL	4q13.1	0	0.00	1	0.13	0.185	0.538	(B) BRAF Class 2
TMEM132C	12q24.32-q24.33	0	0.00	1	0.13	0.185	0.538	(B) BRAF Class 2
TTC28	22q12.1	0	0.00	1	0.13	0.185	0.538	(B) BRAF Class 2
VPREB1	22q11.22	0	0.00	1	0.13	0.185	0.538	(B) BRAF Class 2
VRK2	2p16.1	0	0.00	1	0.13	0.185	0.538	(B) BRAF Class 2
NFKBIA	14q13.2	26	1.09	3	0.55	0.186	0.538	(A) BRAF Class 1 v12
MAPK1	22q11.22	19	0.79	7	1.29	0.186	0.538	(B) BRAF Class 2
ROBO1	3p12.3	7	4.40	3	10.34	0.186	0.538	(B) BRAF Class 2
FGF4	11q13.3	29	1.86	10	2.75	0.187	0.538	(B) BRAF Class 2
ARFRP1	20q13.33	7	1.00	3	2.36	0.187	0.538	(B) BRAF Class 2
BCL2L11	2q13	8	0.68	0	0.00	0.187	0.538	(A) BRAF Class 1 v12
CDK6	7q21.2	19	0.75	7	1.23	0.187	0.538	(B) BRAF Class 2
UIMC1	5q35.2	14	2.32	1	0.70	0.188	0.538	(A) BRAF Class 1 v12
CBL	11q23.3	57	2.22	17	2.94	0.188	0.538	(B) BRAF Class 2
PPP6C	9q33.3	42	3.31	6	2.09	0.188	0.538	(A) BRAF Class 1 v12
COP1	1q25.1-q25.2	34	2.25	11	3.24	0.188	0.538	(B) BRAF Class 2
FAT3	11q14.3	21	8.14	7	12.96	0.19	0.539	(B) BRAF Class 2
DKC1	Xq28	8	1.37	0	0.00	0.19	0.539	(A) BRAF Class 1 v12
FANCB	Xp22.2	20	3.00	2	1.31	0.19	0.539	(A) BRAF Class 1 v12
KLF2	19p13.11	8	1.37	0	0.00	0.191	0.542	(A) BRAF Class 1 v12
RAD54L	1p34.1	19	1.45	2	0.63	0.193	0.545	(A) BRAF Class 1 v12
BRCA1	17q21.31	101	3.98	30	4.85	0.196	0.549	(B) BRAF Class 2
CTLA4	2q33.2	25	1.43	3	0.74	0.196	0.549	(A) BRAF Class 1 v12
TFE3	Xp11.23	30	2.64	3	1.38	0.196	0.55	(A) BRAF Class 1 v12
AR	Xq12	120	4.73	35	5.65	0.197	0.55	(B) BRAF Class 2
SMC3	10q25.2	27	1.85	8	2.82	0.197	0.55	(B) BRAF Class 2
DHX15	4p15.2	14	4.20	0	0.00	0.198	0.551	(A) BRAF Class 1 v12
SMARCB1	22q11.23|22q11	41	1.28	12	1.78	0.199	0.552	(B) BRAF Class 2
KAT6B	10q22.2	43	6.30	13	8.55	0.201	0.552	(B) BRAF Class 2
RXRA	9q34.2	17	3.23	2	1.43	0.201	0.552	(A) BRAF Class 1 v12
RIT1	1q22	25	1.28	3	0.67	0.203	0.552	(A) BRAF Class 1 v12
RB1	13q14.2	105	3.26	27	3.98	0.203	0.552	(B) BRAF Class 2
MTA1	14q32.33	25	4.29	3	2.26	0.204	0.552	(A) BRAF Class 1 v12
ATP1B2	17p13.1	0	0.00	1	9.09	0.204	0.552	(B) BRAF Class 2
CDH12	5p14.3	0	0.00	1	9.09	0.204	0.552	(B) BRAF Class 2
PRKAR1A	17q24.2	23	0.94	8	1.43	0.204	0.552	(B) BRAF Class 2
SMAD4	18q21.2	230	7.02	42	6.05	0.204	0.552	(A) BRAF Class 1 v12
GRM3	7q21.11-q21.12	58	8.81	7	5.98	0.204	0.552	(A) BRAF Class 1 v12
RAD52	12p13.33	24	1.28	3	0.67	0.205	0.553	(A) BRAF Class 1 v12
AKT3	1q43-q44	35	1.36	11	1.92	0.205	0.553	(B) BRAF Class 2
ERCC1	19q13.32	7	0.66	3	1.49	0.207	0.554	(B) BRAF Class 2
CUX1	7q22.1	117	8.20	18	6.52	0.207	0.554	(A) BRAF Class 1 v12
MYD88	3p22.2	31	1.21	10	1.74	0.208	0.554	(B) BRAF Class 2
CDC73	1q31.2	42	1.71	13	2.32	0.208	0.554	(B) BRAF Class 2
CRTC2	1q21.3	7	1.98	3	4.41	0.209	0.555	(B) BRAF Class 2
JAZF1	7p15.2-p15.1	6	0.76	3	1.74	0.209	0.555	(B) BRAF Class 2
IKZF3	17q12-q21.1	7	1.26	3	2.80	0.21	0.556	(B) BRAF Class 2
DDX41	5q35.3	5	1.07	2	3.03	0.211	0.556	(B) BRAF Class 2
NSD1	5q35.3	126	6.05	34	7.16	0.211	0.556	(B) BRAF Class 2
CD276	15q24.1	19	1.61	2	0.73	0.213	0.56	(A) BRAF Class 1 v12
ASXL2	2p23.3	58	4.41	17	5.67	0.215	0.563	(B) BRAF Class 2
ERCC3	2q14.3	39	1.80	12	2.45	0.215	0.563	(B) BRAF Class 2
GRIN2A	16p13.2	157	10.27	41	11.85	0.221	0.575	(B) BRAF Class 2
KLF4	9q31.2	35	1.80	11	2.48	0.223	0.58	(B) BRAF Class 2
TP53BP1	15q15.3	59	5.00	11	3.73	0.225	0.582	(A) BRAF Class 1 v12
TAP2	6p21.32	5	0.95	3	2.14	0.225	0.582	(B) BRAF Class 2
ELOC	8q21.11	6	0.33	3	0.73	0.225	0.582	(B) BRAF Class 2
PARP3	3p21.2	0	0.00	1	2.22	0.226	0.582	(B) BRAF Class 2
LRP1B	2q22.1-q22.2	146	21.35	28	25.00	0.226	0.582	(B) BRAF Class 2
MLH3	14q24.3	29	3.60	9	5.11	0.227	0.582	(B) BRAF Class 2
FANCI	15q26.1	47	4.13	12	5.50	0.227	0.582	(B) BRAF Class 2
HIST1H3G	6p22.2	6	0.54	3	1.17	0.228	0.583	(B) BRAF Class 2
SPEN	1p36.21-p36.13	142	9.11	28	7.71	0.231	0.585	(A) BRAF Class 1 v12
CADM2	3p12.1	8	3.04	3	6.25	0.232	0.585	(B) BRAF Class 2
CBFA2T3	16q24.3	24	4.08	8	5.93	0.233	0.585	(B) BRAF Class 2
RACK1	5q35.3	4	1.52	2	4.17	0.233	0.585	(B) BRAF Class 2
MYOD1	11p15.1	29	2.32	4	1.39	0.233	0.585	(A) BRAF Class 1 v12
MAP2K4	17p12	40	1.58	12	2.11	0.233	0.585	(B) BRAF Class 2
ENG	9q34.11	13	2.23	1	0.75	0.233	0.585	(A) BRAF Class 1 v12
FAH	15q25.1	13	2.23	1	0.75	0.233	0.585	(A) BRAF Class 1 v12
KMT2D	12q13.12	362	14.76	90	16.07	0.234	0.586	(B) BRAF Class 2
ETV6	12p13.2	51	2.09	15	2.69	0.235	0.586	(B) BRAF Class 2
NPM1	5q35.1	22	0.71	7	1.06	0.238	0.591	(B) BRAF Class 2
JUN	1p32.1	23	1.61	3	0.89	0.24	0.591	(A) BRAF Class 1 v12
LAMP1	13q34	6	1.40	2	3.51	0.24	0.591	(B) BRAF Class 2
LMO1	11p15.4	17	0.75	6	1.17	0.24	0.591	(B) BRAF Class 2
PRF1	10q22.1	30	3.23	4	1.97	0.241	0.591	(A) BRAF Class 1 v12
PTK2	8q24.3	8	2.27	0	0.00	0.241	0.591	(A) BRAF Class 1 v12
RBL2	16q12.2	8	2.27	0	0.00	0.241	0.591	(A) BRAF Class 1 v12
RAC2	22q13.1	6	1.14	0	0.00	0.241	0.591	(A) BRAF Class 1 v12
TRAF7	16p13.3	44	2.27	7	1.58	0.241	0.591	(A) BRAF Class 1 v12
TET3	2p13.1	1	2.94	1	20.00	0.243	0.592	(B) BRAF Class 2
CCND3	6p21.1	21	0.83	7	1.23	0.243	0.592	(B) BRAF Class 2
KMT2B	19q13.12	121	11.67	21	9.72	0.244	0.594	(A) BRAF Class 1 v12
PHF6	Xq26.2	20	1.33	6	2.03	0.246	0.596	(B) BRAF Class 2
GATA4	8p23.1	32	2.26	4	1.39	0.246	0.596	(A) BRAF Class 1 v12
TSC1	9q34.13	81	3.19	22	3.85	0.247	0.597	(B) BRAF Class 2
INPP4A	2q11.2	23	1.95	3	1.10	0.249	0.598	(A) BRAF Class 1 v12
DMD	Xp21.2-p21.1	12	3.40	4	5.88	0.249	0.598	(B) BRAF Class 2
AKT2	19q13.2	49	1.91	14	2.44	0.249	0.598	(B) BRAF Class 2
ABCB11	2q31.1	33	5.05	10	6.80	0.252	0.599	(B) BRAF Class 2
EME1	17q21.33	10	1.72	4	3.01	0.252	0.599	(B) BRAF Class 2
XRCC4	5q14.2	10	1.72	4	3.01	0.252	0.599	(B) BRAF Class 2
CSF3R	1p34.3	52	2.35	15	2.97	0.253	0.599	(B) BRAF Class 2
MDM4	1q32.1	29	1.14	9	1.58	0.253	0.599	(B) BRAF Class 2
LZTR1	22q11.21|22q11.1-q11.2	25	3.89	6	5.77	0.254	0.599	(B) BRAF Class 2
WRN	8p12	52	4.49	14	5.69	0.255	0.599	(B) BRAF Class 2
SUZ12	17q11.2	33	1.47	10	1.98	0.256	0.599	(B) BRAF Class 2
PAXIP1	7q36.2	25	4.29	8	6.02	0.257	0.599	(B) BRAF Class 2
DEPDC5	22q12.2-q12.3	13	4.94	4	8.33	0.258	0.599	(B) BRAF Class 2
MCL1	1q21.2	25	1.02	8	1.43	0.258	0.599	(B) BRAF Class 2
INSR	19p13.2	57	4.31	10	3.27	0.258	0.599	(A) BRAF Class 1 v12
TLR4	9q33.1	13	3.08	4	5.19	0.259	0.599	(B) BRAF Class 2
XPA	9q22.33	13	1.27	1	0.45	0.261	0.599	(A) BRAF Class 1 v12
ACVR2A	2q22.3-q23.1	1	0.85	1	5.26	0.261	0.599	(B) BRAF Class 2
TGM7	15q15.2-q15.3	1	0.85	1	5.26	0.261	0.599	(B) BRAF Class 2
MAP3K13	3q27.2	20	1.52	7	2.21	0.261	0.599	(B) BRAF Class 2
CDH1	16q22.1	72	2.30	12	1.80	0.261	0.599	(A) BRAF Class 1 v12
APOBEC3G	22q13.1	1	1.16	1	7.14	0.262	0.599	(B) BRAF Class 2
PC	11q13.2	1	1.16	1	7.14	0.262	0.599	(B) BRAF Class 2
PCLO	7q21.11	1	1.16	1	7.14	0.262	0.599	(B) BRAF Class 2
PDCD11	10q24.33	1	1.16	1	7.14	0.262	0.599	(B) BRAF Class 2
VHL	3p25.3	27	0.86	8	1.20	0.263	0.601	(B) BRAF Class 2
ABL2	1q25.2	20	3.01	5	4.63	0.263	0.601	(B) BRAF Class 2
FANCC	9q22.32	38	1.55	6	1.07	0.265	0.602	(A) BRAF Class 1 v12
POLQ	3q13.33	54	8.35	15	10.34	0.266	0.602	(B) BRAF Class 2
BCOR	Xp11.4	156	6.36	31	5.54	0.266	0.602	(A) BRAF Class 1 v12
DNMT1	19p13.2	53	4.05	15	5.03	0.266	0.602	(B) BRAF Class 2
BCR	22q11.23	22	3.82	2	1.94	0.267	0.603	(A) BRAF Class 1 v12
TLR2	4q31.3	1	2.08	1	12.50	0.268	0.603	(B) BRAF Class 2
RPL10	Xq28	1	1.05	1	6.25	0.269	0.603	(B) BRAF Class 2
PAK1	11q13.5-q14.1	14	1.07	5	1.67	0.269	0.603	(B) BRAF Class 2
GNA11	19p13.3	25	0.77	8	1.07	0.269	0.604	(B) BRAF Class 2
EPHB1	3q22.2	64	4.09	18	4.96	0.271	0.604	(B) BRAF Class 2
USP8	15q21.2	14	2.36	5	3.68	0.271	0.604	(B) BRAF Class 2
PAX3	2q36.1	11	1.94	3	3.53	0.271	0.604	(B) BRAF Class 2
TP63	3q28	57	4.57	16	5.59	0.275	0.607	(B) BRAF Class 2
WWTR1	3q25.1	3	0.50	2	1.28	0.275	0.607	(B) BRAF Class 2
RAD21	8q24.11	57	2.51	10	1.93	0.275	0.607	(A) BRAF Class 1 v12
FRK	6q22.1	1	1.09	1	6.25	0.276	0.607	(B) BRAF Class 2
GLMN	1p22.1	1	1.09	1	6.25	0.276	0.607	(B) BRAF Class 2
ABRAXAS1	4q21.23	17	0.89	2	0.45	0.276	0.607	(A) BRAF Class 1 v12
CTCF	16q22.1	51	2.41	9	1.82	0.277	0.607	(A) BRAF Class 1 v12
HELQ	4q21.23	18	3.09	6	4.51	0.277	0.607	(B) BRAF Class 2
HMBS	11q23.3	7	1.20	3	2.26	0.279	0.61	(B) BRAF Class 2
HSP90AB1	6p21.1	1	0.40	1	2.22	0.281	0.612	(B) BRAF Class 2
MGMT	10q26.3	1	0.64	1	3.57	0.282	0.612	(B) BRAF Class 2
SHH	7q36.3	1	0.64	1	3.57	0.282	0.612	(B) BRAF Class 2
SPRY2	13q31.1	1	0.64	1	3.57	0.282	0.612	(B) BRAF Class 2
ERF	19q13.2	9	1.71	4	2.86	0.283	0.612	(B) BRAF Class 2
RBM15	1p13.3	1	0.86	1	4.76	0.284	0.612	(B) BRAF Class 2
FANCD2	3p25.3	59	3.85	14	4.73	0.284	0.612	(B) BRAF Class 2
HNF1A	12q24.31	106	3.36	26	3.87	0.285	0.612	(B) BRAF Class 2
NPRL3	16p13.3	1	0.38	1	2.08	0.285	0.612	(B) BRAF Class 2
PMAIP1	18q21.32	6	0.51	0	0.00	0.285	0.612	(A) BRAF Class 1 v12
PDPK1	16p13.3	6	0.48	0	0.00	0.288	0.614	(A) BRAF Class 1 v12
PLAG1	8q12.1	1	0.38	1	2.04	0.288	0.614	(B) BRAF Class 2
PARP1	1q42.12	44	3.13	13	3.89	0.288	0.614	(B) BRAF Class 2
ERCC6	10q11.23	34	5.83	10	7.52	0.289	0.614	(B) BRAF Class 2
PMS1	2q32.2	55	2.39	15	2.91	0.289	0.614	(B) BRAF Class 2
NUF2	1q23.3	10	1.90	1	0.71	0.291	0.615	(A) BRAF Class 1 v12
FGFR3	4p16.3	91	2.73	24	3.16	0.291	0.615	(B) BRAF Class 2
MTAP	9p21.3	39	6.26	12	7.84	0.292	0.615	(B) BRAF Class 2
NKX2-1	14q13.3	58	2.36	16	2.85	0.292	0.615	(B) BRAF Class 2
INSRR	1q23.1	6	0.18	0	0.00	0.293	0.616	(A) BRAF Class 1 v12
PIK3CB	3q22.3	46	3.11	8	2.35	0.295	0.619	(A) BRAF Class 1 v12
CHD2	15q26.1	38	6.04	8	7.92	0.296	0.621	(B) BRAF Class 2
PIK3C2B	1q32.1	94	6.49	16	5.44	0.3	0.625	(A) BRAF Class 1 v12
PIK3R1	5q13.1	68	2.65	18	3.13	0.3	0.625	(B) BRAF Class 2
BUB1B	15q15.1	24	2.35	7	3.18	0.302	0.625	(B) BRAF Class 2
MGA	15q15.1	180	9.97	37	8.96	0.302	0.625	(A) BRAF Class 1 v12
FOXO1	13q14.11	27	1.99	4	1.32	0.303	0.625	(A) BRAF Class 1 v12
FUS	16p11.2	16	1.51	5	2.21	0.303	0.625	(B) BRAF Class 2
FANCE	6p21.31	19	1.20	2	0.64	0.303	0.625	(A) BRAF Class 1 v12
REL	2p16.1	41	1.68	7	1.25	0.303	0.625	(A) BRAF Class 1 v12
EIF4A2	3q27.3	11	0.99	4	1.56	0.305	0.625	(B) BRAF Class 2
FRS2	12q15	6	0.95	2	1.98	0.306	0.625	(B) BRAF Class 2
MAPKAP1	9q33.3	5	0.95	0	0.00	0.306	0.625	(A) BRAF Class 1 v12
SRSF2	17q25.1	27	1.20	4	0.80	0.306	0.625	(A) BRAF Class 1 v12
PRKCI	3q26.2	48	2.50	13	3.05	0.307	0.625	(B) BRAF Class 2
INPPL1	11q13.4	31	5.89	6	4.29	0.308	0.625	(A) BRAF Class 1 v12
MAX	14q23.3	15	0.79	5	1.16	0.308	0.625	(B) BRAF Class 2
PPP2R2A	8p21.2	8	2.20	0	0.00	0.308	0.625	(A) BRAF Class 1 v12
TCF7L2	10q25.2-q25.3	76	3.40	14	2.82	0.308	0.625	(A) BRAF Class 1 v12
BCORL1	Xq26.1	114	7.05	20	6.08	0.308	0.625	(A) BRAF Class 1 v12
BIRC3	11q22.2	15	1.24	5	1.81	0.309	0.625	(B) BRAF Class 2
UBE2T	1q32.1	4	0.69	2	1.50	0.31	0.625	(B) BRAF Class 2
BORCS8-MEF2B	19p13.11	19	0.57	6	0.79	0.311	0.626	(B) BRAF Class 2
PRDM14	8q13.3	14	2.66	2	1.43	0.312	0.628	(A) BRAF Class 1 v12
HIST1H3F	6p22.2	4	0.36	2	0.78	0.313	0.628	(B) BRAF Class 2
FAS	10q23.31	18	1.23	2	0.67	0.314	0.628	(A) BRAF Class 1 v12
BTK	Xq22.1	27	1.65	8	2.15	0.314	0.628	(B) BRAF Class 2
BARD1	2q35	38	1.79	11	2.23	0.314	0.628	(B) BRAF Class 2
INHA	2q35	21	1.90	3	1.18	0.316	0.629	(A) BRAF Class 1 v12
KCNQ1	11p15.5-p15.4	26	4.46	4	3.01	0.317	0.629	(A) BRAF Class 1 v12
FGF5	4q21.21	10	3.00	0	0.00	0.317	0.629	(A) BRAF Class 1 v12
FGF3	11q13.3	27	1.65	8	2.14	0.317	0.629	(B) BRAF Class 2
APC	5q22.2	355	11.32	86	12.01	0.319	0.632	(B) BRAF Class 2
TCF3	19p13.3	65	3.08	12	2.53	0.322	0.637	(A) BRAF Class 1 v12
MITF	3p13	64	2.61	12	2.14	0.324	0.639	(A) BRAF Class 1 v12
FAT1	4q35.2	262	12.87	64	13.76	0.326	0.642	(B) BRAF Class 2
MDM2	12q15	44	1.74	12	2.10	0.327	0.642	(B) BRAF Class 2
IGF1R	15q26.3	111	4.33	28	4.84	0.327	0.642	(B) BRAF Class 2
ARID1B	6q25.3	172	7.26	42	7.91	0.33	0.646	(B) BRAF Class 2
ASXL1	20q11.21	131	5.27	33	5.82	0.332	0.649	(B) BRAF Class 2
KDM5A	12p13.33	120	5.69	31	6.30	0.332	0.649	(B) BRAF Class 2
RTEL1	20q13.33	20	3.78	7	4.96	0.334	0.65	(B) BRAF Class 2
TDG	12q23.3	8	1.37	3	2.26	0.335	0.652	(B) BRAF Class 2
IRF2	4q35.1	6	1.15	2	2.20	0.336	0.653	(B) BRAF Class 2
GATA2	3q21.3	50	2.30	9	1.84	0.338	0.655	(A) BRAF Class 1 v12
ERRFI1	1p36.23	25	1.74	4	1.20	0.339	0.655	(A) BRAF Class 1 v12
XRCC2	7q36.1	23	1.23	7	1.59	0.339	0.655	(B) BRAF Class 2
PAK3	Xq23	17	2.49	4	3.57	0.341	0.657	(B) BRAF Class 2
RECQL4	8q24.3	120	5.58	24	4.97	0.341	0.657	(A) BRAF Class 1 v12
PIK3CA	3q26.32	312	9.33	75	9.88	0.342	0.657	(B) BRAF Class 2
CUL3	2q36.2	20	1.31	3	0.84	0.342	0.657	(A) BRAF Class 1 v12
CARM1	19p13.2	9	1.71	1	0.71	0.344	0.657	(A) BRAF Class 1 v12
BRCC3	Xq28	12	2.03	4	2.96	0.344	0.657	(B) BRAF Class 2
FKBP9	7p14.3	6	1.70	0	0.00	0.345	0.657	(A) BRAF Class 1 v12
CEBPA	19q13.11	28	1.17	8	1.47	0.346	0.657	(B) BRAF Class 2
MECOM	3q26.2	70	7.34	13	6.22	0.346	0.657	(A) BRAF Class 1 v12
FANCG	9p13.3	27	1.67	7	2.13	0.347	0.657	(B) BRAF Class 2
PIK3C2G	12p12.3	81	6.17	22	6.94	0.347	0.657	(B) BRAF Class 2
IGF2	11p15.5	24	1.15	7	1.47	0.348	0.657	(B) BRAF Class 2
RELA	11q13.1	16	2.05	2	1.18	0.348	0.657	(A) BRAF Class 1 v12
ROS1	6q22.1	241	9.27	55	8.66	0.349	0.657	(A) BRAF Class 1 v12
CREBBP	16p13.3	193	7.61	40	7.02	0.35	0.657	(A) BRAF Class 1 v12
CDKN1B	12p13.1	35	1.38	6	1.05	0.35	0.657	(A) BRAF Class 1 v12
AMER1	Xq11.2	64	4.09	17	4.68	0.35	0.658	(B) BRAF Class 2
SOCS1	16p13.13	25	1.02	4	0.71	0.352	0.659	(A) BRAF Class 1 v12
ERCC4	16p13.12	52	2.28	14	2.65	0.353	0.66	(B) BRAF Class 2
ZMYM3	Xq13.1	6	2.73	2	5.00	0.355	0.663	(B) BRAF Class 2
PRDM1	6q21	90	3.66	18	3.21	0.356	0.663	(A) BRAF Class 1 v12
RNF8	6p21.2	5	0.86	0	0.00	0.357	0.663	(A) BRAF Class 1 v12
DDB2	11p11.2	16	1.56	2	0.91	0.357	0.663	(A) BRAF Class 1 v12
CCND1	11q13.3	34	1.35	10	1.62	0.358	0.664	(B) BRAF Class 2
PHF1	6p21.32	5	0.15	0	0.00	0.359	0.664	(A) BRAF Class 1 v12
ICOSLG	21q22.3	16	1.36	5	1.83	0.36	0.664	(B) BRAF Class 2
MTOR	1p36.22	144	5.53	38	5.97	0.361	0.664	(B) BRAF Class 2
TGFBR1	9q22.33	20	1.70	6	2.20	0.362	0.664	(B) BRAF Class 2
KCNIP1	5q35.1	6	2.28	0	0.00	0.362	0.664	(A) BRAF Class 1 v12
PIK3CG	7q22.3	75	4.89	19	5.49	0.363	0.664	(B) BRAF Class 2
STAT4	2q32.2-q32.3	23	3.39	5	4.46	0.364	0.664	(B) BRAF Class 2
VEGFA	6p21.1	20	0.99	6	1.28	0.364	0.664	(B) BRAF Class 2
CDK8	13q12.13	36	1.69	10	2.02	0.364	0.664	(B) BRAF Class 2
MTR	1q43	2	1.71	1	5.26	0.366	0.664	(B) BRAF Class 2
CHD1	5q15-q21.1	6	3.85	0	0.00	0.366	0.664	(A) BRAF Class 1 v12
FGF2	4q28.1	3	0.90	1	2.50	0.366	0.664	(B) BRAF Class 2
RIF1	2q23.3	41	7.03	11	8.27	0.367	0.664	(B) BRAF Class 2
DYNC1I1	7q21.3	2	2.33	1	7.14	0.367	0.664	(B) BRAF Class 2
TSHZ3	19q12	2	2.33	1	7.14	0.367	0.664	(B) BRAF Class 2
PRSS8	16p11.2	7	1.36	0	0.00	0.369	0.667	(A) BRAF Class 1 v12
PIK3C3	18q12.3	33	2.52	6	1.96	0.37	0.667	(A) BRAF Class 1 v12
ADGRA2	8p11.23	35	5.64	7	6.93	0.37	0.667	(B) BRAF Class 2
BCL6	3q27.3	57	2.32	11	1.96	0.372	0.668	(A) BRAF Class 1 v12
MEN1	11q13.1	57	2.32	11	1.96	0.372	0.668	(A) BRAF Class 1 v12
DOT1L	19p13.3	78	5.01	16	4.41	0.375	0.669	(A) BRAF Class 1 v12
SMAD3	15q22.33	25	1.70	7	2.10	0.376	0.669	(B) BRAF Class 2
PIK3R2	19p13.11	34	2.22	6	1.73	0.376	0.669	(A) BRAF Class 1 v12
PCDHAC2	5q31.3	2	4.17	1	12.50	0.376	0.669	(B) BRAF Class 2
TNFAIP3	6q23.3	58	2.36	15	2.68	0.376	0.669	(B) BRAF Class 2
PTPRO	12p12.3|12p13-p12	1	0.86	1	3.23	0.378	0.672	(B) BRAF Class 2
PDE4DIP	1q21.2	6	4.92	0	0.00	0.379	0.672	(A) BRAF Class 1 v12
FAAP100	17q25.3	24	4.12	4	3.01	0.381	0.675	(A) BRAF Class 1 v12
SMARCE1	17q21.2	5	0.74	2	1.30	0.383	0.677	(B) BRAF Class 2
GATA3	10p14	71	2.89	18	3.21	0.386	0.681	(B) BRAF Class 2
GNAQ	9q21.2	29	0.89	8	1.07	0.387	0.681	(B) BRAF Class 2
CENPA	2p23.3	5	0.45	2	0.78	0.388	0.681	(B) BRAF Class 2
EIF4E	4q23	5	0.45	2	0.78	0.388	0.681	(B) BRAF Class 2
PTPRT	20q12-q13.11	159	11.31	38	12.03	0.39	0.683	(B) BRAF Class 2
POLB	8p11.21	9	1.54	3	2.26	0.391	0.683	(B) BRAF Class 2
UROD	1p34.1	9	1.54	3	2.26	0.391	0.683	(B) BRAF Class 2
RAD51C	17q22	25	1.15	7	1.40	0.391	0.683	(B) BRAF Class 2
RNF213	17q25.3	7	5.74	2	9.52	0.392	0.683	(B) BRAF Class 2
AJUBA	14q11.2	2	1.28	1	3.57	0.392	0.683	(B) BRAF Class 2
CYLD	16q12.1	49	2.36	12	2.69	0.393	0.683	(B) BRAF Class 2
SLX4	16p13.3	98	6.64	23	7.21	0.394	0.683	(B) BRAF Class 2
CAMTA1	1p36.31-p36.23	2	1.25	1	3.45	0.395	0.684	(B) BRAF Class 2
HIST1H3C	6p22.2	9	0.52	3	0.75	0.395	0.684	(B) BRAF Class 2
MAP3K7	6q15	2	0.79	1	2.17	0.396	0.685	(B) BRAF Class 2
AXIN2	17q24.1	83	4.29	17	3.85	0.399	0.688	(A) BRAF Class 1 v12
H3F3C	12p11.21	9	0.76	3	1.10	0.4	0.688	(B) BRAF Class 2
CYSLTR2	13q14.2	8	1.22	3	1.76	0.4	0.688	(B) BRAF Class 2
VTCN1	1p13.1-p12	13	1.10	4	1.47	0.402	0.689	(B) BRAF Class 2
KIF1B	1p36.22	28	4.80	5	3.76	0.403	0.689	(A) BRAF Class 1 v12
PTPRD	9p24.1-p23	184	10.64	43	11.20	0.403	0.689	(B) BRAF Class 2
SESN3	11q21	8	1.52	1	0.71	0.404	0.689	(A) BRAF Class 1 v12
BABAM2	2p23.2	14	2.40	2	1.50	0.405	0.689	(A) BRAF Class 1 v12
MYBL1	8q13.1	30	2.70	5	2.12	0.405	0.689	(A) BRAF Class 1 v12
NBN	8q21.3	77	3.06	19	3.34	0.406	0.689	(B) BRAF Class 2
FLT4	5q35.3	171	7.05	36	6.63	0.406	0.689	(A) BRAF Class 1 v12
SNCAIP	5q23.2	44	6.69	9	7.69	0.406	0.689	(B) BRAF Class 2
TET1	10q21.3	118	6.41	29	6.84	0.408	0.69	(B) BRAF Class 2
STK19	6p21.33	12	2.28	2	1.43	0.409	0.69	(A) BRAF Class 1 v12
IL7R	5p13.2	98	4.68	24	5.03	0.409	0.69	(B) BRAF Class 2
RAD51B	14q24.1	13	0.93	4	1.22	0.412	0.694	(B) BRAF Class 2
WT1	11p13	68	2.74	17	2.99	0.413	0.694	(B) BRAF Class 2
CDK4	12q14.1	43	1.70	9	1.45	0.415	0.696	(A) BRAF Class 1 v12
MAP3K1	5q11.2	98	4.00	24	4.29	0.416	0.696	(B) BRAF Class 2
PTCH2	1p34.1	6	2.51	2	4.00	0.416	0.696	(B) BRAF Class 2
SMYD3	1q44	8	1.52	3	2.14	0.417	0.696	(B) BRAF Class 2
EGFR	7p11.2	132	3.95	28	3.69	0.417	0.696	(A) BRAF Class 1 v12
NFKBIE	6p21.1	14	1.95	4	2.52	0.418	0.697	(B) BRAF Class 2
NEIL1	15q24.2	9	1.54	1	0.75	0.419	0.697	(A) BRAF Class 1 v12
IFNGR1	6q23.3	18	1.53	3	1.10	0.421	0.699	(A) BRAF Class 1 v12
DNMT3B	20q11.21	34	2.89	9	3.30	0.422	0.699	(B) BRAF Class 2
PLK2	5q11.2	27	2.29	5	1.83	0.423	0.699	(A) BRAF Class 1 v12
FUBP1	1p31.1	27	1.79	5	1.43	0.423	0.699	(A) BRAF Class 1 v12
PAX7	1p36.13	15	2.65	3	3.53	0.423	0.699	(B) BRAF Class 2
IKZF1	7p12.2	122	4.99	26	4.66	0.423	0.699	(A) BRAF Class 1 v12
PML	15q24.1	28	4.05	5	3.25	0.425	0.7	(A) BRAF Class 1 v12
ARID5B	10q21.2	50	3.81	10	3.33	0.425	0.7	(A) BRAF Class 1 v12
FGFR4	5q35.2	72	2.81	19	3.03	0.426	0.7	(B) BRAF Class 2
RRAGC	1p34.3	5	0.75	2	1.20	0.427	0.7	(B) BRAF Class 2
ZBTB2	6q25.1	3	0.61	1	1.35	0.429	0.7	(B) BRAF Class 2
SDHC	1q23.3	18	0.76	3	0.55	0.429	0.7	(A) BRAF Class 1 v12
MRE11	11q21	56	2.54	14	2.78	0.43	0.7	(B) BRAF Class 2
EPHB6	7q34	2	1.00	1	2.44	0.43	0.7	(B) BRAF Class 2
HSD3B1	1p12	13	2.48	3	3.30	0.43	0.7	(B) BRAF Class 2
TAL1	1p33	10	1.46	3	1.97	0.431	0.701	(B) BRAF Class 2
CD79A	19q13.2	22	1.47	6	1.73	0.434	0.702	(B) BRAF Class 2
NFKBIZ	3q12.3	14	1.53	2	1.01	0.434	0.702	(A) BRAF Class 1 v12
MYC	8q24.21	89	3.46	20	3.21	0.434	0.702	(A) BRAF Class 1 v12
NOTCH4	6p21.32	91	6.44	22	6.85	0.434	0.702	(B) BRAF Class 2
ERG	21q22.2	62	2.92	13	2.63	0.435	0.702	(A) BRAF Class 1 v12
ETV4	17q21.31	20	1.37	3	1.00	0.436	0.702	(A) BRAF Class 1 v12
MED12	Xq13.1	118	5.37	28	5.06	0.436	0.702	(A) BRAF Class 1 v12
LATS2	13q12.11	48	4.01	10	3.55	0.438	0.703	(A) BRAF Class 1 v12
PPP2R1A	19q13.41	35	1.59	9	1.78	0.438	0.703	(B) BRAF Class 2
CDKN2C	1p32.3	14	0.57	4	0.72	0.439	0.704	(B) BRAF Class 2
SOS1	2p22.1	37	3.03	10	3.37	0.441	0.704	(B) BRAF Class 2
TLX3	5q35.1	14	2.38	4	2.96	0.442	0.704	(B) BRAF Class 2
PIK3R3	1p34.1	13	1.10	2	0.73	0.442	0.704	(A) BRAF Class 1 v12
XIAP	Xq25	13	1.10	2	0.73	0.442	0.704	(A) BRAF Class 1 v12
ATRX	Xq21.1	167	6.59	39	6.84	0.443	0.704	(B) BRAF Class 2
ZNF217	20q13.2	55	3.44	10	3.06	0.443	0.704	(A) BRAF Class 1 v12
PTK2B	8p21.2	23	3.55	6	4.14	0.444	0.704	(B) BRAF Class 2
CSF1R	5q32	63	2.46	14	2.66	0.444	0.704	(B) BRAF Class 2
ALK	2p23.2-p23.1	183	5.48	40	5.27	0.449	0.711	(A) BRAF Class 1 v12
RPS6KA4	11q13.1	35	2.97	7	2.56	0.451	0.712	(A) BRAF Class 1 v12
SESN2	1p35.3	5	0.95	2	1.43	0.452	0.712	(B) BRAF Class 2
STAT3	17q21.2	45	1.84	9	1.63	0.453	0.712	(A) BRAF Class 1 v12
DDB1	11q12.2	22	3.77	4	3.01	0.453	0.712	(A) BRAF Class 1 v12
ZBTB7A	19p13.3	12	3.60	2	5.00	0.455	0.712	(B) BRAF Class 2
GPC3	Xq26.2	20	1.78	5	2.08	0.456	0.712	(B) BRAF Class 2
CSMD3	8q23.3	3	2.56	1	5.26	0.456	0.712	(B) BRAF Class 2
ITGA10	1q21.1	3	2.56	1	5.26	0.456	0.712	(B) BRAF Class 2
EP400	12q24.33	5	4.17	0	0.00	0.457	0.712	(A) BRAF Class 1 v12
ZRSR2	Xp22.2	41	1.83	10	2.00	0.458	0.712	(B) BRAF Class 2
BLM	15q26.1	107	4.41	25	4.60	0.458	0.712	(B) BRAF Class 2
TSHZ2	20q13.2	3	3.49	1	7.14	0.458	0.712	(B) BRAF Class 2
DIS3L2	2q37.1	19	2.91	5	3.40	0.459	0.712	(B) BRAF Class 2
ACVR1	2q24.1	22	1.18	4	0.95	0.461	0.712	(A) BRAF Class 1 v12
PRKN	6q26	79	3.30	19	3.47	0.461	0.712	(B) BRAF Class 2
NEGR1	1p31.1	28	2.08	7	2.33	0.462	0.712	(B) BRAF Class 2
ESR1	6q25.1-q25.2	54	2.05	12	1.88	0.463	0.712	(A) BRAF Class 1 v12
FIP1L1	4q12	2	1.31	1	2.86	0.463	0.712	(B) BRAF Class 2
HIST1H3A	6p22.2	2	0.18	1	0.39	0.463	0.712	(B) BRAF Class 2
XRCC5	2q35	10	1.66	3	2.11	0.463	0.712	(B) BRAF Class 2
ETV1	7p21.2	58	2.55	14	2.72	0.464	0.713	(B) BRAF Class 2
IRS2	13q34	78	4.99	19	5.23	0.466	0.714	(B) BRAF Class 2
CDH4	20q13.33	35	6.00	7	5.26	0.466	0.714	(A) BRAF Class 1 v12
TOP1	20q12	27	1.68	5	1.41	0.467	0.714	(A) BRAF Class 1 v12
KIF5B	10p11.22	11	2.68	2	3.64	0.468	0.714	(B) BRAF Class 2
RHOA	3p21.31	31	1.53	6	1.32	0.469	0.714	(A) BRAF Class 1 v12
RHBDF2	17q25.1	26	4.46	5	3.76	0.47	0.714	(A) BRAF Class 1 v12
CACNA1E	1q25.3	3	6.25	1	12.50	0.47	0.714	(B) BRAF Class 2
CRTC1	19p13.11	37	3.65	7	3.21	0.47	0.714	(A) BRAF Class 1 v12
RAD51	15q15.1	19	0.87	5	1.00	0.472	0.714	(B) BRAF Class 2
MUTYH	1p34.1	45	1.83	11	1.96	0.472	0.714	(B) BRAF Class 2
BBC3	19q13.32	8	0.68	1	0.37	0.472	0.714	(A) BRAF Class 1 v12
TSC2	16p13.3	134	5.28	29	5.08	0.472	0.714	(A) BRAF Class 1 v12
PTPN14	1q32.3-q41	17	2.92	3	2.26	0.474	0.715	(A) BRAF Class 1 v12
FH	1q43	48	1.97	10	1.80	0.476	0.716	(A) BRAF Class 1 v12
MYH9	22q12.3	8	3.13	2	4.26	0.477	0.716	(B) BRAF Class 2
BCL10	1p22.3	17	1.41	3	1.09	0.478	0.716	(A) BRAF Class 1 v12
MSH2	2p21-p16.3	72	2.92	17	3.05	0.478	0.716	(B) BRAF Class 2
NRIP1	21q11.2-q21.1	3	3.26	1	6.25	0.479	0.716	(B) BRAF Class 2
ZFPM1	16q24.2	3	3.26	1	6.25	0.479	0.716	(B) BRAF Class 2
RANBP2	2q13	56	11.34	9	12.16	0.48	0.716	(B) BRAF Class 2
ZNF703	8p11.23	21	2.97	3	2.33	0.48	0.716	(A) BRAF Class 1 v12
TMPRSS2	21q22.3	40	1.91	10	2.04	0.481	0.716	(B) BRAF Class 2
HNRNPK	9q21.32	4	0.93	1	1.67	0.482	0.716	(B) BRAF Class 2
POLH	6p21.1	11	1.70	3	2.08	0.484	0.716	(B) BRAF Class 2
SRP19	5q22.2	3	0.82	0	0.00	0.484	0.716	(A) BRAF Class 1 v12
PREX2	8q13.2	139	12.00	30	12.30	0.485	0.716	(B) BRAF Class 2
PRKD1	14q12	11	1.87	2	1.32	0.486	0.716	(A) BRAF Class 1 v12
GNA13	17q24.1	3	0.42	1	0.77	0.486	0.716	(B) BRAF Class 2
CDK2	12q13.2	3	0.69	1	1.28	0.486	0.716	(B) BRAF Class 2
MAP3K2	2q14.3	3	1.92	1	3.57	0.486	0.716	(B) BRAF Class 2
SIN3A	15q24.2	3	1.92	1	3.57	0.486	0.716	(B) BRAF Class 2
BMPR1A	10q23.2	48	2.07	10	1.90	0.487	0.717	(A) BRAF Class 1 v12
NTHL1	16p13.3	10	0.86	3	1.05	0.49	0.72	(B) BRAF Class 2
TCF7L1	2p11.2	8	1.79	2	2.35	0.492	0.72	(B) BRAF Class 2
GSTM5	1p13.3	4	1.13	0	0.00	0.493	0.72	(A) BRAF Class 1 v12
NCOR2	12q24.31	3	2.61	1	4.76	0.493	0.72	(B) BRAF Class 2
STAG1	3q22.3	28	4.14	5	4.59	0.494	0.72	(B) BRAF Class 2
SBDS	7q11.21	7	0.68	2	0.90	0.494	0.72	(B) BRAF Class 2
ERCC5	13q33.1	73	3.37	17	3.48	0.495	0.722	(B) BRAF Class 2
DNAH9	17p12	6	8.70	2	11.76	0.497	0.722	(B) BRAF Class 2
BCL2L1	20q11.21	11	0.46	3	0.55	0.498	0.722	(B) BRAF Class 2
XRCC6	22q13.2	11	1.89	3	2.26	0.498	0.722	(B) BRAF Class 2
EXT1	8q24.11	21	2.05	5	2.27	0.499	0.722	(B) BRAF Class 2
MYCN	2p24.3	43	1.70	11	1.78	0.5	0.722	(B) BRAF Class 2
ARAF	Xp11.3	65	2.51	14	2.39	0.501	0.722	(A) BRAF Class 1 v12
HIST1H1C	6p22.2	25	2.00	5	1.75	0.501	0.722	(A) BRAF Class 1 v12
SH2D1A	Xq25	11	0.60	3	0.71	0.502	0.722	(B) BRAF Class 2
MUS81	11q13.1	12	2.06	2	1.50	0.502	0.722	(A) BRAF Class 1 v12
PHOX2B	4p13	48	2.08	10	1.94	0.502	0.722	(A) BRAF Class 1 v12
RAB35	12q24.23	11	0.99	3	1.18	0.503	0.722	(B) BRAF Class 2
CBFB	16q22.1	16	0.76	3	0.61	0.503	0.722	(A) BRAF Class 1 v12
MAP3K9	14q24.2	9	4.89	1	2.86	0.505	0.722	(A) BRAF Class 1 v12
TMEM127	2q11.2	11	0.61	3	0.72	0.506	0.722	(B) BRAF Class 2
CDK5	7q36.1	3	0.85	1	1.47	0.507	0.722	(B) BRAF Class 2
PLCG2	16q23.3	51	3.93	11	3.70	0.508	0.722	(A) BRAF Class 1 v12
FGF7	15q21.2	4	0.92	1	1.52	0.508	0.722	(B) BRAF Class 2
BRD3	9q34.2	30	4.34	6	3.90	0.508	0.722	(A) BRAF Class 1 v12
CD58	1p13.1	3	0.70	1	1.20	0.508	0.722	(B) BRAF Class 2
RAC1	7p22.1	50	2.17	12	2.25	0.508	0.722	(B) BRAF Class 2
LIG4	13q33.3	20	3.43	5	3.76	0.509	0.722	(B) BRAF Class 2
NCOA3	20q13.12	52	3.98	11	3.77	0.511	0.723	(A) BRAF Class 1 v12
DICER1	14q32.13	92	3.83	20	3.72	0.512	0.724	(A) BRAF Class 1 v12
JAK1	1p31.3	79	3.53	20	3.59	0.513	0.725	(B) BRAF Class 2
CLDN18	3q22.3	4	2.56	0	0.00	0.514	0.725	(A) BRAF Class 1 v12
ALOX12B	17p13.1	37	2.25	8	2.09	0.514	0.725	(A) BRAF Class 1 v12
XRCC1	19q13.31	12	1.86	2	1.39	0.516	0.725	(A) BRAF Class 1 v12
MAPK3	16p11.2	20	1.80	5	1.95	0.516	0.725	(B) BRAF Class 2
DAXX	6p21.32	41	1.99	9	1.87	0.518	0.725	(A) BRAF Class 1 v12
ABL1	9q34.12	88	2.80	19	2.84	0.518	0.725	(B) BRAF Class 2
CCND2	12p13.32	25	0.99	5	0.88	0.519	0.725	(A) BRAF Class 1 v12
IGF2R	6q25.3	8	2.40	2	2.99	0.519	0.725	(B) BRAF Class 2
SAMD9	7q21.2	4	2.14	0	0.00	0.519	0.725	(A) BRAF Class 1 v12
FLCN	17p11.2	60	2.46	14	2.51	0.52	0.725	(B) BRAF Class 2
POLR2A	17p13.1	4	4.35	0	0.00	0.521	0.726	(A) BRAF Class 1 v12
GNAS	20q13.32	106	3.23	22	3.17	0.522	0.726	(A) BRAF Class 1 v12
FOXL2	3q22.3	46	2.09	10	1.98	0.522	0.726	(A) BRAF Class 1 v12
FGF10	5p12	9	1.27	2	1.55	0.525	0.728	(B) BRAF Class 2
EIF1AX	Xp22.12	20	1.46	4	1.27	0.526	0.729	(A) BRAF Class 1 v12
CD274	9p24.1	20	0.83	4	0.72	0.527	0.729	(A) BRAF Class 1 v12
CCNQ	Xq28	6	1.14	2	1.43	0.527	0.729	(B) BRAF Class 2
EWSR1	22q12.2	28	1.76	6	1.85	0.528	0.729	(B) BRAF Class 2
RET	10q11.21	123	3.68	28	3.69	0.529	0.729	(B) BRAF Class 2
PGR	11q22.1	67	6.05	15	5.88	0.529	0.729	(A) BRAF Class 1 v12
GEN1	2p24.2	24	2.31	5	2.45	0.53	0.729	(B) BRAF Class 2
EP300	22q13.2	172	7.00	39	6.96	0.53	0.729	(A) BRAF Class 1 v12
STAT5A	17q21.2	20	1.70	4	1.49	0.531	0.729	(A) BRAF Class 1 v12
PDCD1LG2	9p24.1	25	1.21	5	1.10	0.532	0.729	(A) BRAF Class 1 v12
NUP93	16q13	30	2.06	7	2.14	0.533	0.73	(B) BRAF Class 2
XPC	3p25.1	22	2.15	5	2.27	0.535	0.731	(B) BRAF Class 2
TENT5C	1p12	37	1.51	8	1.43	0.535	0.731	(A) BRAF Class 1 v12
SMO	7q32.1	98	3.08	22	3.05	0.538	0.734	(A) BRAF Class 1 v12
HIST1H3D	6p22.2	7	0.63	1	0.39	0.541	0.735	(A) BRAF Class 1 v12
GRM8	7q31.33	4	3.42	0	0.00	0.544	0.735	(A) BRAF Class 1 v12
RECQL	12p12.1	14	2.66	4	2.86	0.544	0.735	(B) BRAF Class 2
YAP1	11q22.1	28	1.50	6	1.40	0.544	0.735	(A) BRAF Class 1 v12
RPA1	17p13.3	11	1.61	2	1.26	0.544	0.735	(A) BRAF Class 1 v12
NAB2	12q13.3	13	3.90	1	2.50	0.545	0.735	(A) BRAF Class 1 v12
RHOH	4p14	3	0.44	0	0.00	0.547	0.735	(A) BRAF Class 1 v12
KNSTRN	15q15.1	20	2.71	5	2.82	0.547	0.735	(B) BRAF Class 2
RBBP8	18q11.2	30	5.15	7	5.26	0.548	0.735	(B) BRAF Class 2
GATA1	Xp11.23	20	1.27	4	1.14	0.548	0.735	(A) BRAF Class 1 v12
MSI2	17q22	6	1.14	1	0.71	0.548	0.735	(A) BRAF Class 1 v12
SESN1	6q21	6	1.14	1	0.71	0.548	0.735	(A) BRAF Class 1 v12
PMS2	7p22.1	53	2.15	12	2.15	0.55	0.735	(B) BRAF Class 2
SLC34A2	4p15.2	29	4.26	7	4.35	0.551	0.735	(B) BRAF Class 2
RBM10	Xp11.3	82	3.97	19	3.95	0.551	0.735	(A) BRAF Class 1 v12
GABRA6	5q34	16	3.05	3	3.30	0.551	0.735	(B) BRAF Class 2
DOCK8	9p24.3	48	8.23	11	8.27	0.552	0.735	(B) BRAF Class 2
RAD51D	17q12	21	0.97	5	1.00	0.553	0.735	(B) BRAF Class 2
PPM1D	17q23.2	45	2.49	10	2.43	0.553	0.735	(A) BRAF Class 1 v12
SUFU	10q24.32	45	1.83	10	1.79	0.554	0.735	(A) BRAF Class 1 v12
NUTM1	15q14	29	5.06	5	5.21	0.554	0.735	(B) BRAF Class 2
NR0B1	Xp21.2	11	1.89	2	1.50	0.554	0.735	(A) BRAF Class 1 v12
MAFB	20q12	3	0.44	1	0.65	0.555	0.735	(B) BRAF Class 2
ARHGAP35	19q13.32	31	4.26	7	4.32	0.556	0.735	(B) BRAF Class 2
FYN	6q21	26	2.07	6	2.11	0.556	0.735	(B) BRAF Class 2
CCN6	6q21	17	2.51	3	2.68	0.556	0.735	(B) BRAF Class 2
STK40	1p34.3	12	1.02	3	1.10	0.558	0.735	(B) BRAF Class 2
RPS6KB1	17q23.1	5	1.50	0	0.00	0.558	0.735	(A) BRAF Class 1 v12
SAMD9L	7q21.2	4	4.35	1	6.25	0.559	0.735	(B) BRAF Class 2
YES1	18p11.32	21	1.78	5	1.83	0.559	0.735	(B) BRAF Class 2
MYB	6q23.3	19	1.21	4	1.25	0.559	0.735	(B) BRAF Class 2
AGO2	8q24.3	26	4.94	7	5.00	0.561	0.735	(B) BRAF Class 2
FAAP20	1p36.33	3	0.51	1	0.75	0.561	0.735	(B) BRAF Class 2
MDC1	6p21.33	65	5.52	15	5.49	0.562	0.735	(A) BRAF Class 1 v12
NCOR1	17p12-p11.2	79	5.34	18	5.34	0.563	0.735	(A) BRAF Class 1 v12
ETV5	3q27.2	24	1.64	5	1.67	0.564	0.735	(B) BRAF Class 2
CRLF2	Xp22.33 and Yp11.2	31	1.32	7	1.32	0.565	0.735	(B) BRAF Class 2
KDM6B	17p13.1	20	5.52	4	5.71	0.565	0.735	(B) BRAF Class 2
CSNK1A1	5q32	5	1.50	0	0.00	0.565	0.735	(A) BRAF Class 1 v12
FGF9	13q12.11	5	1.50	0	0.00	0.565	0.735	(A) BRAF Class 1 v12
ZBTB20	3q13.31	4	2.56	1	3.57	0.566	0.735	(B) BRAF Class 2
EZH1	17q21.2	7	1.06	2	1.20	0.568	0.737	(B) BRAF Class 2
IKZF2	2q34	4	1.82	1	2.50	0.569	0.738	(B) BRAF Class 2
SQSTM1	5q35.3	4	1.52	1	2.08	0.57	0.738	(B) BRAF Class 2
TSHR	14q31.1	57	2.64	13	2.64	0.571	0.738	(A) BRAF Class 1 v12
CHD5	1p36.31	10	6.41	2	7.14	0.572	0.739	(B) BRAF Class 2
TAF1	Xq13.1	28	5.31	4	4.94	0.573	0.739	(A) BRAF Class 1 v12
FANCM	14q21.2	40	5.35	9	5.29	0.578	0.744	(A) BRAF Class 1 v12
ID3	1p36.12	8	0.35	2	0.39	0.579	0.745	(B) BRAF Class 2
TYRO3	15q15.1	2	1.48	0	0.00	0.587	0.755	(A) BRAF Class 1 v12
CDK9	9q34.11	3	0.85	0	0.00	0.589	0.755	(A) BRAF Class 1 v12
PSMD13	11p15.5	3	0.85	0	0.00	0.589	0.755	(A) BRAF Class 1 v12
RPL22	1p36.31	3	5.66	0	0.00	0.59	0.755	(A) BRAF Class 1 v12
UPF1	19p13.11	15	2.85	4	2.86	0.591	0.756	(B) BRAF Class 2
CDC42	1p36.12	3	0.45	1	0.60	0.593	0.757	(B) BRAF Class 2
RRAS	19q13.33	3	0.45	1	0.60	0.593	0.757	(B) BRAF Class 2
DDX3X	Xp11.4	3	1.20	0	0.00	0.594	0.757	(A) BRAF Class 1 v12
LTK	15q15.1	3	1.30	1	1.72	0.595	0.758	(B) BRAF Class 2
GAB2	11q14.1	3	1.81	0	0.00	0.597	0.759	(A) BRAF Class 1 v12
GPS2	17p13.1	13	1.15	3	1.15	0.6	0.762	(B) BRAF Class 2
CALR	19p13.13	26	1.34	6	1.33	0.601	0.762	(A) BRAF Class 1 v12
HDAC4	2q37.3	3	1.35	0	0.00	0.601	0.762	(A) BRAF Class 1 v12
NPRL2	3p21.31	3	1.14	0	0.00	0.604	0.762	(A) BRAF Class 1 v12
HIST1H3E	6p22.2	10	0.90	2	0.78	0.604	0.762	(A) BRAF Class 1 v12
HIST1H3J	6p22.1	10	0.90	2	0.78	0.604	0.762	(A) BRAF Class 1 v12
EPCAM	2p21	18	0.91	4	0.88	0.605	0.762	(A) BRAF Class 1 v12
LYN	8q12.1	27	2.63	6	2.62	0.605	0.762	(A) BRAF Class 1 v12
IGF1	12q23.2	6	0.47	1	0.33	0.605	0.762	(A) BRAF Class 1 v12
EED	11q14.2	14	0.88	3	0.83	0.608	0.764	(A) BRAF Class 1 v12
DCUN1D1	3q26.33	7	0.59	2	0.62	0.608	0.764	(B) BRAF Class 2
EPAS1	2p21	12	2.28	3	2.14	0.61	0.764	(A) BRAF Class 1 v12
TAP1	6p21.32	12	2.28	3	2.14	0.61	0.764	(A) BRAF Class 1 v12
TRIM37	17q22	18	3.09	4	3.01	0.611	0.765	(A) BRAF Class 1 v12
HIST2H3D	1q21.2	6	0.55	1	0.40	0.614	0.767	(A) BRAF Class 1 v12
THADA	2p21	3	1.94	0	0.00	0.616	0.767	(A) BRAF Class 1 v12
RHOT1	17q11.2	6	1.03	1	0.75	0.616	0.767	(A) BRAF Class 1 v12
SDHAF2	11q12.2	10	0.45	2	0.40	0.616	0.767	(A) BRAF Class 1 v12
GLI3	7p14.1	26	7.37	5	7.35	0.616	0.767	(A) BRAF Class 1 v12
DPYD	1p21.3	4	1.62	1	1.92	0.618	0.768	(B) BRAF Class 2
KMT5A	12q24.31	3	0.55	1	0.67	0.62	0.77	(B) BRAF Class 2
DNAJB1	19p13.12	14	1.07	3	1.03	0.621	0.77	(A) BRAF Class 1 v12
CD22	19q13.12	2	1.72	0	0.00	0.622	0.77	(A) BRAF Class 1 v12
WAS	Xp11.23	10	1.45	2	1.30	0.622	0.77	(A) BRAF Class 1 v12
CDH23	10q22.1	3	6.25	0	0.00	0.624	0.77	(A) BRAF Class 1 v12
TGFB1	19q13.2	3	6.25	0	0.00	0.624	0.77	(A) BRAF Class 1 v12
UMODL1	21q22.3	3	6.25	0	0.00	0.624	0.77	(A) BRAF Class 1 v12
SLITRK6	13q31.1	12	3.67	2	3.33	0.627	0.773	(A) BRAF Class 1 v12
NUP214	9q34.13	5	3.82	1	4.35	0.628	0.773	(B) BRAF Class 2
LMO2	11p13	6	0.65	1	0.50	0.634	0.775	(A) BRAF Class 1 v12
FGF1	5q31.3	4	1.20	0	0.00	0.634	0.775	(A) BRAF Class 1 v12
ADAMTS20	12q12	3	2.56	0	0.00	0.634	0.775	(A) BRAF Class 1 v12
FN1	2q35	3	2.56	0	0.00	0.634	0.775	(A) BRAF Class 1 v12
FOXP4	6p21.1	3	2.56	0	0.00	0.634	0.775	(A) BRAF Class 1 v12
RPS6KA2	6q27	3	2.56	0	0.00	0.634	0.775	(A) BRAF Class 1 v12
TNK2	3q29	3	2.56	0	0.00	0.634	0.775	(A) BRAF Class 1 v12
NEIL2	8p23.1	4	0.69	1	0.75	0.643	0.784	(B) BRAF Class 2
OGG1	3p25.3	4	0.69	1	0.75	0.643	0.784	(B) BRAF Class 2
TAL2	9q31.2	4	0.68	1	0.74	0.645	0.786	(B) BRAF Class 2
MSI1	12q24.31	8	1.52	2	1.43	0.647	0.787	(A) BRAF Class 1 v12
BRINP3	1q31.1	5	4.24	1	4.55	0.649	0.788	(B) BRAF Class 2
HSP90AA1	14q32.31	8	1.50	1	1.20	0.652	0.791	(A) BRAF Class 1 v12
ADGRB3	6q12-q13	3	5.56	0	0.00	0.656	0.794	(A) BRAF Class 1 v12
HIST1H2BD	6p22.2	9	0.76	2	0.73	0.656	0.794	(A) BRAF Class 1 v12
IL10	1q32.1	9	0.76	2	0.73	0.656	0.794	(A) BRAF Class 1 v12
MAF	16q23.2	4	0.56	1	0.59	0.657	0.794	(B) BRAF Class 2
EPHB4	7q22.1	4	1.33	1	1.39	0.661	0.796	(B) BRAF Class 2
FAAP24	19q13.11	2	0.34	0	0.00	0.663	0.796	(A) BRAF Class 1 v12
TAZ	Xq28	2	0.34	0	0.00	0.663	0.796	(A) BRAF Class 1 v12
CAMK1	3p25.3	2	0.06	0	0.00	0.664	0.796	(A) BRAF Class 1 v12
EPB41L4A	5q22.1-q22.2	2	0.06	0	0.00	0.664	0.796	(A) BRAF Class 1 v12
H19	11p15.5	2	0.06	0	0.00	0.664	0.796	(A) BRAF Class 1 v12
TRBC2	7q34	2	0.06	0	0.00	0.664	0.796	(A) BRAF Class 1 v12
PAX8	2q14.1	8	1.39	1	1.15	0.665	0.797	(A) BRAF Class 1 v12
MLLT3	9p21.3	9	2.47	1	2.08	0.672	0.804	(A) BRAF Class 1 v12
HIST2H3C	1q21.2	5	0.45	1	0.39	0.687	0.821	(A) BRAF Class 1 v12
CDH20	18q21.33	2	1.00	0	0.00	0.688	0.821	(A) BRAF Class 1 v12
ID4	6p22.3	5	0.86	1	0.75	0.69	0.823	(A) BRAF Class 1 v12
CDK1	10q21.2	2	0.57	0	0.00	0.703	0.836	(A) BRAF Class 1 v12
RPL26	17p13.1	2	0.57	0	0.00	0.703	0.836	(A) BRAF Class 1 v12
DUSP2	2q11.2	2	0.91	0	0.00	0.715	0.85	(A) BRAF Class 1 v12
ASPSCR1	17q25.3	2	1.72	0	0.00	0.716	0.85	(A) BRAF Class 1 v12
BCL9	1q21.2	2	1.64	0	0.00	0.717	0.85	(A) BRAF Class 1 v12
UBR5	8q22.3	2	1.49	0	0.00	0.718	0.851	(A) BRAF Class 1 v12
ABCB4	7q21.12	2	2.17	0	0.00	0.724	0.855	(A) BRAF Class 1 v12
OGA	10q24.32	2	2.17	0	0.00	0.724	0.855	(A) BRAF Class 1 v12
SMARCAL1	2q35	2	2.17	0	0.00	0.724	0.855	(A) BRAF Class 1 v12
AFF1	4q21.3-q22.1	2	1.64	0	0.00	0.727	0.855	(A) BRAF Class 1 v12
CDH11	16q21	2	1.64	0	0.00	0.727	0.855	(A) BRAF Class 1 v12
KNL1	15q15.1	2	1.64	0	0.00	0.727	0.855	(A) BRAF Class 1 v12
TRIM33	1p13.2	2	1.64	0	0.00	0.727	0.855	(A) BRAF Class 1 v12
USP7	16p13.2	2	2.33	0	0.00	0.738	0.865	(A) BRAF Class 1 v12
GUCY1A2	11q22.3	2	1.71	0	0.00	0.739	0.865	(A) BRAF Class 1 v12
NLRP1	17p13.2	2	1.71	0	0.00	0.739	0.865	(A) BRAF Class 1 v12
STK36	2q35	2	1.71	0	0.00	0.739	0.865	(A) BRAF Class 1 v12
TRIM24	7q33-q34	2	1.71	0	0.00	0.739	0.865	(A) BRAF Class 1 v12
CDKN2B-AS1	9p21.3	1	0.26	0	0.00	0.781	0.869	(A) BRAF Class 1 v12
KIF3A	5q31.1	1	2.33	0	0.00	0.796	0.869	(A) BRAF Class 1 v12
SGK1	6q23.2	1	0.66	0	0.00	0.799	0.869	(A) BRAF Class 1 v12
HLA-C	6p21.33	1	0.87	0	0.00	0.81	0.869	(A) BRAF Class 1 v12
TPMT	6p22.3	1	0.66	0	0.00	0.813	0.869	(A) BRAF Class 1 v12
PHLPP2	16q22.2	1	0.76	0	0.00	0.814	0.869	(A) BRAF Class 1 v12
SLX1B	16p11.2	1	0.17	0	0.00	0.814	0.869	(A) BRAF Class 1 v12
MAP3K14	17q21.31	1	0.09	0	0.00	0.814	0.869	(A) BRAF Class 1 v12
ABCA17P	16p13.3	1	0.03	0	0.00	0.815	0.869	(A) BRAF Class 1 v12
ABR	17p13.3	1	0.03	0	0.00	0.815	0.869	(A) BRAF Class 1 v12
ANKLE2	12q24.33	1	0.03	0	0.00	0.815	0.869	(A) BRAF Class 1 v12
ANKRD30A	10p11.21	1	0.03	0	0.00	0.815	0.869	(A) BRAF Class 1 v12
AP1G1	16q22.2	1	0.03	0	0.00	0.815	0.869	(A) BRAF Class 1 v12
APBA1	9q21.12	1	0.03	0	0.00	0.815	0.869	(A) BRAF Class 1 v12
ARHGAP4	Xq28	1	0.03	0	0.00	0.815	0.869	(A) BRAF Class 1 v12
ARSB	5q14.1	1	0.03	0	0.00	0.815	0.869	(A) BRAF Class 1 v12
CASZ1	1p36.22	1	0.03	0	0.00	0.815	0.869	(A) BRAF Class 1 v12
CLIP1	12q24.31	1	0.03	0	0.00	0.815	0.869	(A) BRAF Class 1 v12
CPSF1	8q24.3	1	0.03	0	0.00	0.815	0.869	(A) BRAF Class 1 v12
CTDSP1	2q35	1	0.03	0	0.00	0.815	0.869	(A) BRAF Class 1 v12
CTRC	1p36.21	1	0.03	0	0.00	0.815	0.869	(A) BRAF Class 1 v12
CTSB	8p23.1	1	0.03	0	0.00	0.815	0.869	(A) BRAF Class 1 v12
CUL1	7q36.1	1	0.03	0	0.00	0.815	0.869	(A) BRAF Class 1 v12
DCBLD1	6q22.1	1	0.03	0	0.00	0.815	0.869	(A) BRAF Class 1 v12
DDAH1	1p22.3	1	0.03	0	0.00	0.815	0.869	(A) BRAF Class 1 v12
DEF8	16q24.3	1	0.03	0	0.00	0.815	0.869	(A) BRAF Class 1 v12
DENND4C	9p22.1	1	0.03	0	0.00	0.815	0.869	(A) BRAF Class 1 v12
DHRSX	Xp22.33 and Yp11.2	1	0.03	0	0.00	0.815	0.869	(A) BRAF Class 1 v12
DRICH1	22q11.23	1	0.03	0	0.00	0.815	0.869	(A) BRAF Class 1 v12
EIF3E	8q23.1	1	0.03	0	0.00	0.815	0.869	(A) BRAF Class 1 v12
ELAC2	17p12	1	0.03	0	0.00	0.815	0.869	(A) BRAF Class 1 v12
EMID1	22q12.2	1	0.03	0	0.00	0.815	0.869	(A) BRAF Class 1 v12
F11-AS1	4q35.2	1	0.03	0	0.00	0.815	0.869	(A) BRAF Class 1 v12
FKBP9P1	7p11.2	1	0.03	0	0.00	0.815	0.869	(A) BRAF Class 1 v12
FMC1-LUC7L2	7q34	1	0.03	0	0.00	0.815	0.869	(A) BRAF Class 1 v12
GALNT11	7q36.1|7q36.1	1	0.03	0	0.00	0.815	0.869	(A) BRAF Class 1 v12
GOLT1A	1q32.1	1	0.03	0	0.00	0.815	0.869	(A) BRAF Class 1 v12
GRAPL	17p11.2	1	0.03	0	0.00	0.815	0.869	(A) BRAF Class 1 v12
GRIA1	5q33.2	1	0.03	0	0.00	0.815	0.869	(A) BRAF Class 1 v12
GRIK1	21q21.3	1	0.03	0	0.00	0.815	0.869	(A) BRAF Class 1 v12
HECTD4	12q24.13	1	0.03	0	0.00	0.815	0.869	(A) BRAF Class 1 v12
HLA-DOB	6p21.32	1	0.03	0	0.00	0.815	0.869	(A) BRAF Class 1 v12
HOOK2	19p13.13	1	0.03	0	0.00	0.815	0.869	(A) BRAF Class 1 v12
HSD17B6	12q13.3	1	0.03	0	0.00	0.815	0.869	(A) BRAF Class 1 v12
IGHE	14q32.33	1	0.03	0	0.00	0.815	0.869	(A) BRAF Class 1 v12
LDLR	19p13.2	1	0.03	0	0.00	0.815	0.869	(A) BRAF Class 1 v12
LOC105374464	2p22.2	1	0.03	0	0.00	0.815	0.869	(A) BRAF Class 1 v12
LTBP4	19q13.2	1	0.03	0	0.00	0.815	0.869	(A) BRAF Class 1 v12
MT-ND6	-	1	0.03	0	0.00	0.815	0.869	(A) BRAF Class 1 v12
MYEOV	11q13.3	1	0.03	0	0.00	0.815	0.869	(A) BRAF Class 1 v12
MYO1D	17q11.2	1	0.03	0	0.00	0.815	0.869	(A) BRAF Class 1 v12
MYSM1	1p32.1	1	0.03	0	0.00	0.815	0.869	(A) BRAF Class 1 v12
NBPF20	1q21.1	1	0.03	0	0.00	0.815	0.869	(A) BRAF Class 1 v12
NDUFB2	7q34	1	0.03	0	0.00	0.815	0.869	(A) BRAF Class 1 v12
NELFA	4p16.3	1	0.03	0	0.00	0.815	0.869	(A) BRAF Class 1 v12
PADI2	1p36.13	1	0.03	0	0.00	0.815	0.869	(A) BRAF Class 1 v12
PAX9	14q13.3	1	0.03	0	0.00	0.815	0.869	(A) BRAF Class 1 v12
PFKFB4	3p21.31	1	0.03	0	0.00	0.815	0.869	(A) BRAF Class 1 v12
PKD1	16p13.3	1	0.03	0	0.00	0.815	0.869	(A) BRAF Class 1 v12
PLEKHA7	11p15.2-p15.1	1	0.03	0	0.00	0.815	0.869	(A) BRAF Class 1 v12
PLVAP	19p13.11	1	0.03	0	0.00	0.815	0.869	(A) BRAF Class 1 v12
PNPLA6	19p13.2	1	0.03	0	0.00	0.815	0.869	(A) BRAF Class 1 v12
PRMT6	1p13.3	1	0.03	0	0.00	0.815	0.869	(A) BRAF Class 1 v12
PTBP3	9q32	1	0.03	0	0.00	0.815	0.869	(A) BRAF Class 1 v12
RAB2A	8q12.1-q12.2	1	0.03	0	0.00	0.815	0.869	(A) BRAF Class 1 v12
SAE1	19q13.32	1	0.03	0	0.00	0.815	0.869	(A) BRAF Class 1 v12
SCAP	3p21.31	1	0.03	0	0.00	0.815	0.869	(A) BRAF Class 1 v12
SCARA5	8p21.1	1	0.03	0	0.00	0.815	0.869	(A) BRAF Class 1 v12
SDCCAG8	1q43-q44	1	0.03	0	0.00	0.815	0.869	(A) BRAF Class 1 v12
SEMA6D	15q21.1	1	0.03	0	0.00	0.815	0.869	(A) BRAF Class 1 v12
SIK3	11q23.3	1	0.03	0	0.00	0.815	0.869	(A) BRAF Class 1 v12
SLC30A5	5q13.1-q13.2	1	0.03	0	0.00	0.815	0.869	(A) BRAF Class 1 v12
SND1	7q32.1	1	0.03	0	0.00	0.815	0.869	(A) BRAF Class 1 v12
SPG11	15q21.1	1	0.03	0	0.00	0.815	0.869	(A) BRAF Class 1 v12
TCAF2P1	7q35	1	0.03	0	0.00	0.815	0.869	(A) BRAF Class 1 v12
TRAJ32	14q11.2	1	0.03	0	0.00	0.815	0.869	(A) BRAF Class 1 v12
TRAJ42	14q11.2	1	0.03	0	0.00	0.815	0.869	(A) BRAF Class 1 v12
TRAJ53	14q11.2	1	0.03	0	0.00	0.815	0.869	(A) BRAF Class 1 v12
TRBJ2-2	7q34	1	0.03	0	0.00	0.815	0.869	(A) BRAF Class 1 v12
TRGJP	7p14.1	1	0.03	0	0.00	0.815	0.869	(A) BRAF Class 1 v12
TSPOAP1	17q22	1	0.03	0	0.00	0.815	0.869	(A) BRAF Class 1 v12
UGT1A6	2q37.1	1	0.03	0	0.00	0.815	0.869	(A) BRAF Class 1 v12
ZNF423	16q12.1	1	0.03	0	0.00	0.815	0.869	(A) BRAF Class 1 v12
ZNF599	19q13.11	1	0.03	0	0.00	0.815	0.869	(A) BRAF Class 1 v12
UGT1A1	2q37.1	1	0.40	0	0.00	0.826	0.869	(A) BRAF Class 1 v12
TRRAP	7q22.1	1	0.45	0	0.00	0.827	0.869	(A) BRAF Class 1 v12
MLLT1	19p13.3	1	1.59	0	0.00	0.829	0.869	(A) BRAF Class 1 v12
CDH5	16q21	1	0.50	0	0.00	0.83	0.869	(A) BRAF Class 1 v12
MLF1	3q25.32	1	1.89	0	0.00	0.841	0.869	(A) BRAF Class 1 v12
KBTBD4	11p11.2	1	0.98	0	0.00	0.843	0.869	(A) BRAF Class 1 v12
IRF8	16q24.1	1	0.81	0	0.00	0.844	0.869	(A) BRAF Class 1 v12
PTPN1	20q13.13	1	0.60	0	0.00	0.844	0.869	(A) BRAF Class 1 v12
TBL1XR1	3q26.32	1	0.97	0	0.00	0.844	0.869	(A) BRAF Class 1 v12
IL6ST	5q11.2	1	0.50	0	0.00	0.845	0.869	(A) BRAF Class 1 v12
XBP1	22q12.1|22q12	1	0.45	0	0.00	0.845	0.869	(A) BRAF Class 1 v12
ATF1	12q13.12	1	0.39	0	0.00	0.845	0.869	(A) BRAF Class 1 v12
DDIT3	12q13.3	1	0.39	0	0.00	0.845	0.869	(A) BRAF Class 1 v12
MAML2	11q21	1	0.39	0	0.00	0.845	0.869	(A) BRAF Class 1 v12
TFEB	6p21.1	1	0.45	0	0.00	0.845	0.869	(A) BRAF Class 1 v12
EGR1	5q31.2	1	0.87	0	0.00	0.846	0.869	(A) BRAF Class 1 v12
GNB1	1p36.33	1	2.27	0	0.00	0.846	0.869	(A) BRAF Class 1 v12
AFDN	6q27	1	0.86	0	0.00	0.847	0.869	(A) BRAF Class 1 v12
MRTFA	22q13.1-q13.2	1	0.86	0	0.00	0.847	0.869	(A) BRAF Class 1 v12
PRDM16	1p36.32	1	0.86	0	0.00	0.847	0.869	(A) BRAF Class 1 v12
BCL2L2	14q11.2	1	0.14	0	0.00	0.847	0.869	(A) BRAF Class 1 v12
ECT2L	6q24.1	1	1.00	0	0.00	0.847	0.869	(A) BRAF Class 1 v12
FOXO3	6q21	1	0.81	0	0.00	0.848	0.869	(A) BRAF Class 1 v12
ETNK1	12p12.1	1	0.63	0	0.00	0.849	0.869	(A) BRAF Class 1 v12
BIRC5	17q25.3	1	0.53	0	0.00	0.85	0.869	(A) BRAF Class 1 v12
SP140	2q37.1	1	1.96	0	0.00	0.85	0.869	(A) BRAF Class 1 v12
GID4	17p11.2|17p11.2	1	0.17	0	0.00	0.85	0.869	(A) BRAF Class 1 v12
LCK	1p35.2	1	0.80	0	0.00	0.85	0.869	(A) BRAF Class 1 v12
SSX2	Xp11.22	1	1.75	0	0.00	0.851	0.869	(A) BRAF Class 1 v12
FOSB	19q13.32	1	1.09	0	0.00	0.852	0.869	(A) BRAF Class 1 v12
KRIT1	7q21.2	1	1.09	0	0.00	0.852	0.869	(A) BRAF Class 1 v12
MAML3	4q31.1	1	1.09	0	0.00	0.852	0.869	(A) BRAF Class 1 v12
OTX2	14q22.3	1	1.09	0	0.00	0.852	0.869	(A) BRAF Class 1 v12
TBXT	6q27	1	1.09	0	0.00	0.852	0.869	(A) BRAF Class 1 v12
ARNT	1q21.3	1	0.82	0	0.00	0.853	0.869	(A) BRAF Class 1 v12
HLF	17q22	1	0.82	0	0.00	0.853	0.869	(A) BRAF Class 1 v12
MUC1	1q22	1	0.82	0	0.00	0.853	0.869	(A) BRAF Class 1 v12
NFKB2	10q24.32	1	0.82	0	0.00	0.853	0.869	(A) BRAF Class 1 v12
PER1	17p13.1	1	0.82	0	0.00	0.853	0.869	(A) BRAF Class 1 v12
PSIP1	9p22.3	1	0.82	0	0.00	0.853	0.869	(A) BRAF Class 1 v12
TLX1	10q24.31	1	0.82	0	0.00	0.853	0.869	(A) BRAF Class 1 v12
TPR	1q31.1	1	0.82	0	0.00	0.853	0.869	(A) BRAF Class 1 v12
ZNF384	12p13.31	1	0.82	0	0.00	0.853	0.869	(A) BRAF Class 1 v12
ZNF521	18q11.2	1	0.82	0	0.00	0.853	0.869	(A) BRAF Class 1 v12
SPI1	11p11.2	1	0.90	0	0.00	0.854	0.869	(A) BRAF Class 1 v12
HIP1	7q11.23	1	1.11	0	0.00	0.857	0.869	(A) BRAF Class 1 v12
ARFGAP3	22q13.2	1	2.08	0	0.00	0.857	0.869	(A) BRAF Class 1 v12
CBLC	19q13.32	1	2.78	0	0.00	0.857	0.869	(A) BRAF Class 1 v12
GNAI3	1p13.3	1	2.08	0	0.00	0.857	0.869	(A) BRAF Class 1 v12
LRIG3	12q14.1	1	2.78	0	0.00	0.857	0.869	(A) BRAF Class 1 v12
SNX31	8q22.3	1	2.08	0	0.00	0.857	0.869	(A) BRAF Class 1 v12
TMEM216	11q12.2	1	2.08	0	0.00	0.857	0.869	(A) BRAF Class 1 v12
DUSP6	12q21.33	1	1.16	0	0.00	0.86	0.869	(A) BRAF Class 1 v12
HSPA5	9q33.3	1	1.16	0	0.00	0.86	0.869	(A) BRAF Class 1 v12
AURKC	19q13.43	1	0.85	0	0.00	0.86	0.869	(A) BRAF Class 1 v12
BLNK	10q24.1	1	0.85	0	0.00	0.86	0.869	(A) BRAF Class 1 v12
CYP2C19	10q23.33	1	0.85	0	0.00	0.86	0.869	(A) BRAF Class 1 v12
DST	6p12.1	1	0.85	0	0.00	0.86	0.869	(A) BRAF Class 1 v12
GDNF	5p13.2	1	0.85	0	0.00	0.86	0.869	(A) BRAF Class 1 v12
IKBKB	8p11.21	1	0.85	0	0.00	0.86	0.869	(A) BRAF Class 1 v12
ITGA9	3p22.2	1	0.85	0	0.00	0.86	0.869	(A) BRAF Class 1 v12
ITGB3	17q21.32	1	0.85	0	0.00	0.86	0.869	(A) BRAF Class 1 v12
PLEKHG5	1p36.31	1	0.85	0	0.00	0.86	0.869	(A) BRAF Class 1 v12
RRM1	11p15.4	1	0.85	0	0.00	0.86	0.869	(A) BRAF Class 1 v12
TAF1L	9p21.1	1	0.85	0	0.00	0.86	0.869	(A) BRAF Class 1 v12
THBS1	15q14	1	0.85	0	0.00	0.86	0.869	(A) BRAF Class 1 v12
ETAA1	2p14	1	3.13	0	0.00	0.865	0.871	(A) BRAF Class 1 v12
FOXF1	16q24.1	1	3.13	0	0.00	0.865	0.871	(A) BRAF Class 1 v12
SLFN11	17q12	1	3.13	0	0.00	0.865	0.871	(A) BRAF Class 1 v12
OLIG2	21q22.11	1	3.70	0	0.00	0.871	0.877	(A) BRAF Class 1 v12
MCM7	7q22.1	1	3.23	0	0.00	0.886	0.89	(A) BRAF Class 1 v12
MAGOH	1p32.3	1	0.99	0	0.00	0.886	0.89	(A) BRAF Class 1 v12
CD3EAP	19q13.32	1	0.30	0	0.00	0.893	0.894	(A) BRAF Class 1 v12
TSPAN31	12q14.1	1	0.30	0	0.00	0.893	0.894	(A) BRAF Class 1 v12
ATXN2	12q24.12	1	4.00	0	0.00	0.893	0.894	(A) BRAF Class 1 v12
DUSP22	6p25.3	1	4.00	0	0.00	0.893	0.894	(A) BRAF Class 1 v12
BRAF	7q34	3344	100.00	759	100.00	1	1	(B) BRAF Class 2

## Sheet: S4 All Cancer Class1+2 Filtered
Table S4: Filtered Co-Mutations across all cancer types in BRAF Class 1 and 2
Gene	Cytoband	Class 1 Occurrence	Class 1 %	Class 2 Occurrence	Class 2 %	SumClass	pvalue	qvalue	Enriched In
KDM6A	Xp11.3	65	2.65	31	5.54	96	0.0007429	0.0412	(B) BRAF Class 2
KDR	4q12	163	5.12	58	8.61	221	0.0005075	0.0296	(B) BRAF Class 2
FOXA1	14q21.1	39	1.98	23	5.12	62	0.0003989	0.0277	(B) BRAF Class 2
NFE2L2	2q31.2	31	1.22	20	3.50	51	0.0003631	0.0268	(B) BRAF Class 2
TGFBR2	3p24.1	112	7.16	9	2.48	121	0.0002489	0.0197	(A) BRAF Class 1 v12
CBLB	3q13.11	16	1.52	14	6.19	30	0.0001945	0.0166	(B) BRAF Class 2
FGFR1	8p11.23	55	1.65	30	3.95	85	0.0001606	0.0148	(B) BRAF Class 2
ATR	3q23	126	5.72	55	10.91	181	4.923e-05	0.004963	(B) BRAF Class 2
POT1	7q31.33	13	1.55	16	8.65	29	5.322e-06	0.0005902	(B) BRAF Class 2
FLT3	13q12.2	100	3.11	51	7.52	151	5.25e-07	6.47e-05	(B) BRAF Class 2
TERT	5p15.33	842	34.23	128	23.23	970	2.18e-07	3.025e-05	(A) BRAF Class 1 v12
NF1	17q11.2	142	5.59	82	13.20	224	5.67e-10	8.98e-08	(B) BRAF Class 2
RNF43	17q22	260	11.71	17	3.35	277	3.7e-10	6.84e-08	(A) BRAF Class 1 v12
KEAP1	19p13.2	53	2.24	45	8.33	98	2.56e-10	5.68e-08	(B) BRAF Class 2
TP53	17p13.1	892	26.67	282	39.66	1174	8.22e-12	2.28e-09	(B) BRAF Class 2
NRAS	1p13.2	35	1.05	48	6.32	83	7.92e-16	2.93e-13	(B) BRAF Class 2
KRAS	12p12.1	37	1.11	67	8.83	104	1.44e-25	7.96e-23	(B) BRAF Class 2
STK11	19p13.3	57	1.74	80	11.53	137	4.95e-28	5.48e-25	(B) BRAF Class 2

## Sheet: S5 All Cancer Class1+3
Table S5: Co-Mutations across all cancer types in BRAF Class 1 and 3
Gene	Cytoband	Class 1 occurrence	Class 1 %	Class 3 occurrence	Class 3 %	pvalue	qvalue	Enriched In
KRAS	12p12.1	36	1.08	129	17.22	2.62e-66	2.9e-63	(B) BRAF Class 3
NRAS	1p13.2	34	1.02	94	12.55	8.13e-44	4.5e-41	(B) BRAF Class 3
NF1	17q11.2	144	5.66	141	23.62	7.45e-35	2.75e-32	(B) BRAF Class 3
STK11	19p13.3	57	1.74	79	10.93	1.91e-26	5.29e-24	(B) BRAF Class 3
TP53	17p13.1	892	26.64	328	44.15	2.97e-20	6.58e-18	(B) BRAF Class 3
KEAP1	19p13.2	53	2.24	63	11.07	1.03e-17	1.91e-15	(B) BRAF Class 3
APC	5q22.2	356	11.33	160	22.63	3.86e-14	6.1e-12	(B) BRAF Class 3
HRAS	11p15.5	17	0.51	26	3.48	7.73e-10	1.07e-07	(B) BRAF Class 3
RNF43	17q22	259	11.64	21	4.02	1.14e-08	1.405e-06	(A) BRAF Class 1 v12
SMARCA4	19p13.2	159	6.26	76	12.90	1.73e-07	1.918e-05	(B) BRAF Class 3
NOTCH2	1p12	109	4.36	57	10.00	4.77e-07	4.801e-05	(B) BRAF Class 3
PTPN11	12q24.13	35	1.08	27	3.75	2.746e-06	0.0002533	(B) BRAF Class 3
ERBB4	2q34	206	6.36	83	11.53	3.336e-06	0.000284	(B) BRAF Class 3
MET	7q31.2	121	3.65	57	7.71	3.884e-06	0.0003071	(B) BRAF Class 3
ERBB2	17q12	88	2.63	46	6.19	4.205e-06	0.0003104	(B) BRAF Class 3
PPP2R1A	19q13.41	34	1.54	27	5.19	4.608e-06	0.0003188	(B) BRAF Class 3
FLT3	13q12.2	100	3.10	49	6.87	7.075e-06	0.0004607	(B) BRAF Class 3
MCL1	1q21.2	25	1.02	22	3.80	1.216e-05	0.0007477	(B) BRAF Class 3
TET2	4q24	155	6.23	68	11.53	1.623e-05	0.0009458	(B) BRAF Class 3
ARID1A	1p36.11	269	10.59	99	16.81	3.239e-05	0.001793	(B) BRAF Class 3
ERBB3	12q13.2	81	3.15	41	6.82	6.111e-05	0.003221	(B) BRAF Class 3
PTPRD	9p24.1-p23	184	10.62	71	17.93	7.474e-05	0.00369	(B) BRAF Class 3
PDGFRA	4q12	102	3.13	46	6.33	8.114e-05	0.00369	(B) BRAF Class 3
ATM	11q22.3	260	8.16	91	12.93	8.162e-05	0.00369	(B) BRAF Class 3
PTPRT	20q12-q13.11	160	11.36	61	19.87	8.334e-05	0.00369	(B) BRAF Class 3
EPHA3	3p11.1	92	4.85	43	9.95	8.853e-05	0.003769	(B) BRAF Class 3
SYNE1	6q25.2	11	2.14	11	11.34	0.0001488	0.005777	(B) BRAF Class 3
RAF1	3p25.2	37	1.42	24	3.95	0.0001491	0.005777	(B) BRAF Class 3
TERT	5p15.33	842	34.20	145	26.22	0.0001513	0.005777	(A) BRAF Class 1 v12
BRIP1	17q23.2	65	2.64	34	5.86	0.0001897	0.006998	(B) BRAF Class 3
CBLB	3q13.11	16	1.51	15	5.88	0.0002178	0.007776	(B) BRAF Class 3
FLT1	13q12.3	132	5.37	55	9.48	0.0002812	0.009684	(B) BRAF Class 3
SRC	20q11.23	22	0.83	16	2.86	0.0002887	0.009684	(B) BRAF Class 3
RET	10q11.21	123	3.67	50	6.70	0.0003012	0.009808	(B) BRAF Class 3
PIK3CA	3q26.32	311	9.29	102	13.67	0.0003197	0.0101	(B) BRAF Class 3
FGFR2	10q26.13	89	2.66	39	5.23	0.0004394	0.0135	(B) BRAF Class 3
RHPN2	19q13.11	6	1.69	8	11.59	0.0004555	0.0136	(B) BRAF Class 3
ARID2	12q12	180	7.41	67	11.90	0.0005246	0.0151	(B) BRAF Class 3
HLA-A	6p22.1	48	3.95	1	0.37	0.0005327	0.0151	(A) BRAF Class 1 v12
NOTCH1	9q34.3	178	5.42	64	8.80	0.0005804	0.0157	(B) BRAF Class 3
CARD11	7p22.2	157	6.38	61	10.52	0.0005814	0.0157	(B) BRAF Class 3
KMT2D	12q13.12	362	14.73	118	20.34	0.0007025	0.0184	(B) BRAF Class 3
KDR	4q12	162	5.08	59	8.38	0.0007135	0.0184	(B) BRAF Class 3
MAP3K5	6q23.3	0	0.00	4	12.12	0.0007779	0.0196	(B) BRAF Class 3
DICER1	14q32.13	91	3.78	39	7.01	0.001033	0.0254	(B) BRAF Class 3
COL2A1	12q13.11	5	3.18	7	21.21	0.001095	0.0262	(B) BRAF Class 3
PMS1	2q32.2	55	2.38	27	5.14	0.00112	0.0262	(B) BRAF Class 3
POT1	7q31.33	13	1.54	12	5.83	0.001137	0.0262	(B) BRAF Class 3
TP63	3q28	57	4.57	26	9.74	0.001246	0.0282	(B) BRAF Class 3
CBL	11q23.3	57	2.22	28	4.67	0.001277	0.0282	(B) BRAF Class 3
ASXL1	20q11.21	132	5.30	52	8.81	0.0013	0.0282	(B) BRAF Class 3
SMAD3	15q22.33	25	1.70	16	4.85	0.001331	0.0283	(B) BRAF Class 3
NTRK3	15q25.3	112	4.41	45	7.64	0.001392	0.0291	(B) BRAF Class 3
BCOR	Xp11.4	157	6.40	19	3.26	0.001469	0.0301	(A) BRAF Class 1 v12
ANKRD26	10p12.1	45	13.51	0	0.00	0.001551	0.0312	(A) BRAF Class 1 v12
MSH3	5q14.1	94	8.82	8	3.35	0.001712	0.0338	(A) BRAF Class 1 v12
RUNX1T1	8q21.3	57	4.56	27	9.34	0.001796	0.0348	(B) BRAF Class 3
ZRSR2	Xp22.2	41	1.83	1	0.20	0.001821	0.0348	(A) BRAF Class 1 v12
FGFR4	5q35.2	71	2.76	32	5.30	0.001996	0.0374	(B) BRAF Class 3
MAP3K13	3q27.2	20	1.52	14	4.55	0.002103	0.0388	(B) BRAF Class 3
EGFR	7p11.2	134	4.00	49	6.57	0.002211	0.0401	(B) BRAF Class 3
RRAS2	11p15.2	3	0.45	6	3.75	0.002513	0.0449	(B) BRAF Class 3
KIT	4q12	80	2.39	33	4.41	0.002742	0.0482	(B) BRAF Class 3
RHOH	4p14	3	0.44	6	3.53	0.00283	0.049	(B) BRAF Class 3
FGFR1	8p11.23	55	1.65	25	3.36	0.00303	0.0514	(B) BRAF Class 3
DDR2	1q23.3	55	2.06	26	4.16	0.003064	0.0514	(B) BRAF Class 3
EZH1	17q21.2	7	1.06	8	5.00	0.003271	0.0541	(B) BRAF Class 3
ROS1	6q22.1	244	9.37	81	13.24	0.00338	0.0549	(B) BRAF Class 3
JAK3	19p13.11	103	3.20	39	5.47	0.003443	0.0549	(B) BRAF Class 3
JAK2	9p24.1	62	1.95	27	3.80	0.003497	0.0549	(B) BRAF Class 3
PBRM1	3p21.1	108	4.56	43	7.56	0.003524	0.0549	(B) BRAF Class 3
KDM6A	Xp11.3	65	2.64	29	5.00	0.003694	0.0564	(B) BRAF Class 3
SETBP1	18q12.3	105	7.14	39	11.96	0.003719	0.0564	(B) BRAF Class 3
GRIN2A	16p13.2	157	10.26	54	15.61	0.003868	0.0579	(B) BRAF Class 3
PTK2B	8p21.2	22	3.40	15	8.82	0.004048	0.0597	(B) BRAF Class 3
IGF1	12q23.2	6	0.47	7	2.41	0.004268	0.0618	(B) BRAF Class 3
MAP3K1	5q11.2	98	3.99	39	6.72	0.004299	0.0618	(B) BRAF Class 3
H3F3B	17q25.1	6	0.32	7	1.64	0.004467	0.0625	(B) BRAF Class 3
PTPRS	19p13.3	110	9.34	11	4.35	0.004484	0.0625	(A) BRAF Class 1 v12
ELOC	8q21.11	6	0.33	7	1.69	0.004543	0.0625	(B) BRAF Class 3
ZFHX4	8q21.13	19	12.10	11	33.33	0.004576	0.0625	(B) BRAF Class 3
NFE2L2	2q31.2	31	1.22	17	2.89	0.004696	0.0629	(B) BRAF Class 3
ABCB11	2q31.1	33	5.04	18	11.32	0.004715	0.0629	(B) BRAF Class 3
PLCB4	20p12.3-p12.2	5	2.30	6	13.04	0.004874	0.0642	(B) BRAF Class 3
HIF1A	14q23.2	0	0.00	3	5.56	0.005094	0.0663	(B) BRAF Class 3
SPOP	17q21.33	20	0.91	13	2.50	0.005236	0.0674	(B) BRAF Class 3
PRKCA	17q24.2	0	0.00	3	5.77	0.005326	0.0678	(B) BRAF Class 3
EPHA7	6q16.1	109	6.15	39	10.05	0.005445	0.0685	(B) BRAF Class 3
TRAF7	16p13.3	44	2.26	21	4.69	0.005627	0.07	(B) BRAF Class 3
OR5L1	11q12.1	1	1.16	4	18.18	0.00588	0.0723	(B) BRAF Class 3
QKI	6q26	48	3.62	3	0.95	0.006342	0.0771	(A) BRAF Class 1 v12
EPHA2	1p36.13	0	0.00	3	5.77	0.007125	0.0857	(B) BRAF Class 3
DGKH	13q14.11	0	0.00	3	13.64	0.007543	0.0895	(B) BRAF Class 3
YES1	18p11.32	21	1.78	12	4.74	0.007603	0.0895	(B) BRAF Class 3
ESR1	6q25.1-q25.2	54	2.05	24	3.88	0.0077	0.0895	(B) BRAF Class 3
XRCC3	14q32.33	20	2.92	0	0.00	0.007763	0.0895	(A) BRAF Class 1 v12
BRCA1	17q21.31	103	4.06	39	6.52	0.007961	0.0909	(B) BRAF Class 3
BARD1	2q35	38	1.79	19	3.72	0.0085	0.096	(B) BRAF Class 3
NCKAP5	2q21.2	5	5.81	6	27.27	0.008682	0.0971	(B) BRAF Class 3
RASA2	3q23	2	0.91	4	8.70	0.009126	0.101	(B) BRAF Class 3
RBM10	Xp11.3	83	4.02	33	6.67	0.009728	0.106	(B) BRAF Class 3
ATRX	Xq21.1	167	6.58	56	9.51	0.009736	0.106	(B) BRAF Class 3
PRSS1	7q34	20	2.74	13	6.77	0.0102	0.11	(B) BRAF Class 3
NTRK2	9q21.33	53	2.09	23	3.90	0.0104	0.111	(B) BRAF Class 3
NRG1	8p12	52	5.05	21	9.55	0.0105	0.111	(B) BRAF Class 3
IL7R	5p13.2	99	4.72	37	7.49	0.0109	0.114	(B) BRAF Class 3
HIST1H3C	6p22.2	8	0.46	7	1.79	0.0111	0.114	(B) BRAF Class 3
IKZF1	7p12.2	123	5.02	44	7.61	0.0111	0.114	(B) BRAF Class 3
PML	15q24.1	28	4.04	1	0.58	0.0122	0.124	(A) BRAF Class 1 v12
SPTA1	1q23.1	95	15.10	30	24.00	0.0125	0.126	(B) BRAF Class 3
MECOM	3q26.2	70	7.32	28	12.28	0.0129	0.129	(B) BRAF Class 3
NF2	22q12.2	58	2.25	24	4.03	0.013	0.129	(B) BRAF Class 3
DAXX	6p21.32	41	1.99	19	3.89	0.0133	0.13	(B) BRAF Class 3
LRP1B	2q22.1-q22.2	146	21.31	43	30.50	0.0136	0.132	(B) BRAF Class 3
TLR4	9q33.1	13	3.08	9	8.91	0.0142	0.136	(B) BRAF Class 3
LIFR	5p13.1	4	2.15	5	11.36	0.0143	0.136	(B) BRAF Class 3
AXL	19q13.2	96	3.78	35	5.94	0.0149	0.141	(B) BRAF Class 3
CASR	3q13.33-q21.1	3	3.23	3	27.27	0.0151	0.141	(B) BRAF Class 3
SLIT2	4p15.31	52	8.27	19	15.20	0.0154	0.143	(B) BRAF Class 3
PAX7	1p36.13	15	2.64	8	7.77	0.0156	0.144	(B) BRAF Class 3
FOXO1	13q14.11	27	1.99	13	4.47	0.0157	0.144	(B) BRAF Class 3
CCNQ	Xq28	6	1.14	6	4.72	0.016	0.145	(B) BRAF Class 3
XRCC4	5q14.2	10	1.71	8	5.41	0.0161	0.145	(B) BRAF Class 3
EZH2	7q36.1	48	1.59	20	2.95	0.0165	0.147	(B) BRAF Class 3
FANCA	16q24.3	90	3.54	33	5.60	0.0167	0.148	(B) BRAF Class 3
CCND2	12p13.32	25	0.99	13	2.21	0.0175	0.153	(B) BRAF Class 3
HLA-B	6p21.33	25	4.11	1	0.63	0.0178	0.154	(A) BRAF Class 1 v12
EBF1	5q33.3	1	0.44	3	6.25	0.0179	0.154	(B) BRAF Class 3
PTPRB	12q15	8	5.10	6	18.18	0.0187	0.16	(B) BRAF Class 3
B2M	15q21.1	87	4.01	10	2.03	0.0187	0.16	(A) BRAF Class 1 v12
PAK5	20p12.2	80	6.24	29	9.97	0.0193	0.163	(B) BRAF Class 3
MTAP	9p21.3	39	6.25	19	11.52	0.0197	0.165	(B) BRAF Class 3
NFKBIZ	3q12.3	14	1.53	9	4.15	0.0198	0.165	(B) BRAF Class 3
PPM1D	17q23.2	45	2.49	19	4.59	0.02	0.165	(B) BRAF Class 3
PIK3C2G	12p12.3	81	6.17	30	9.74	0.0205	0.168	(B) BRAF Class 3
PRDM14	8q13.3	14	2.66	9	7.09	0.021	0.171	(B) BRAF Class 3
RB1	13q14.2	105	3.26	35	4.93	0.0226	0.182	(B) BRAF Class 3
FBXW7	4q31.3	185	5.64	56	7.71	0.0227	0.182	(B) BRAF Class 3
SF3B1	2q33.1	58	2.21	23	3.76	0.023	0.182	(B) BRAF Class 3
CXCR4	2q22.1	12	0.63	8	1.80	0.0231	0.182	(B) BRAF Class 3
PAX5	9p13.2	54	2.17	22	3.75	0.0232	0.182	(B) BRAF Class 3
STAG2	Xq25	74	3.02	28	4.83	0.0236	0.184	(B) BRAF Class 3
PIK3R1	5q13.1	69	2.68	26	4.37	0.024	0.185	(B) BRAF Class 3
FGF14	13q33.1	13	1.83	8	5.06	0.0244	0.187	(B) BRAF Class 3
VEGFA	6p21.1	20	0.99	11	2.28	0.0248	0.188	(B) BRAF Class 3
BCL2	18q21.33	12	0.49	8	1.39	0.0249	0.188	(B) BRAF Class 3
USP8	15q21.2	14	2.36	9	6.08	0.0249	0.188	(B) BRAF Class 3
CTNNB1	3p22.1	116	3.47	38	5.09	0.0254	0.19	(B) BRAF Class 3
ETS1	11q24.3	7	1.24	5	4.85	0.0257	0.191	(B) BRAF Class 3
ERCC4	16p13.12	52	2.28	5	0.93	0.0258	0.191	(A) BRAF Class 1 v12
MYCL	1p34.2	33	1.30	15	2.55	0.0262	0.192	(B) BRAF Class 3
CDKN1A	6p21.2	15	0.63	9	1.60	0.0265	0.193	(B) BRAF Class 3
SMAD2	18q21.1	42	1.71	18	3.10	0.0267	0.194	(B) BRAF Class 3
SESN2	1p35.3	5	0.95	5	3.94	0.0282	0.203	(B) BRAF Class 3
CRKL	22q11.21	18	0.73	10	1.72	0.0284	0.203	(B) BRAF Class 3
CDH4	20q13.33	34	5.82	16	10.81	0.0289	0.205	(B) BRAF Class 3
JAK1	1p31.3	79	3.52	29	5.45	0.0294	0.206	(B) BRAF Class 3
IFNGR1	6q23.3	18	1.53	0	0.00	0.0294	0.206	(A) BRAF Class 1 v12
FANCE	6p21.31	19	1.20	10	2.78	0.0298	0.207	(B) BRAF Class 3
RRAS	19q13.33	3	0.45	4	2.50	0.0299	0.207	(B) BRAF Class 3
GATA6	18q11.2	28	1.97	13	3.99	0.0304	0.209	(B) BRAF Class 3
CREB1	2q33.3	0	0.00	2	3.64	0.0306	0.209	(B) BRAF Class 3
COP1	1q25.1-q25.2	34	2.25	14	4.35	0.0312	0.212	(B) BRAF Class 3
TERC	3q26.2	0	0.00	2	1.22	0.0315	0.212	(B) BRAF Class 3
ITK	5q33.3	12	2.01	8	5.30	0.0316	0.212	(B) BRAF Class 3
ATXN2	12q24.12	1	4.00	0	0.00	0.0323	0.214	(A) BRAF Class 1 v12
DUSP22	6p25.3	1	4.00	0	0.00	0.0323	0.214	(A) BRAF Class 1 v12
SMARCA2	9p24.3	2	1.20	3	9.09	0.0326	0.214	(B) BRAF Class 3
SYK	9q22.2	45	2.37	18	4.17	0.0329	0.214	(B) BRAF Class 3
EED	11q14.2	14	0.88	8	2.27	0.033	0.214	(B) BRAF Class 3
ALK	2p23.2-p23.1	181	5.42	54	7.27	0.0331	0.214	(B) BRAF Class 3
MKRN1	7q34	0	0.00	2	0.27	0.0334	0.215	(B) BRAF Class 3
NTRK1	1q23.1	100	3.85	34	5.65	0.0337	0.215	(B) BRAF Class 3
KMT2A	11q23.3	216	8.68	66	11.24	0.0339	0.215	(B) BRAF Class 3
MSH6	2p16.3	139	5.40	21	3.53	0.0342	0.215	(A) BRAF Class 1 v12
TSC2	16p13.3	133	5.23	43	7.29	0.0344	0.215	(B) BRAF Class 3
RASA1	5q14.3	38	2.03	16	3.69	0.0346	0.215	(B) BRAF Class 3
H3F3C	12p11.21	9	0.76	6	2.37	0.0349	0.215	(B) BRAF Class 3
XPC	3p25.1	22	2.15	11	4.56	0.035	0.215	(B) BRAF Class 3
ROBO1	3p12.3	7	4.38	5	15.15	0.0351	0.215	(B) BRAF Class 3
WAS	Xp11.23	10	1.44	7	4.07	0.0351	0.215	(B) BRAF Class 3
SMC3	10q25.2	27	1.84	12	3.73	0.0358	0.218	(B) BRAF Class 3
PAX8	2q14.1	8	1.39	5	4.76	0.0363	0.22	(B) BRAF Class 3
NOTCH3	19p13.12	219	9.99	66	12.84	0.0369	0.222	(B) BRAF Class 3
PRKDC	8q11.21	169	10.70	51	14.25	0.0371	0.222	(B) BRAF Class 3
SUZ12	17q11.2	33	1.47	14	2.78	0.0373	0.222	(B) BRAF Class 3
FANCD2	3p25.3	59	3.84	21	6.25	0.0383	0.226	(B) BRAF Class 3
NEGR1	1p31.1	28	2.07	12	4.12	0.0384	0.226	(B) BRAF Class 3
CTCF	16q22.1	50	2.36	20	3.91	0.0394	0.23	(B) BRAF Class 3
PALB2	16p12.2	87	3.43	30	5.09	0.0395	0.23	(B) BRAF Class 3
SETD2	3p21.31	226	8.90	67	11.38	0.0398	0.231	(B) BRAF Class 3
TRIM28	19q13.43	0	0.00	2	9.09	0.04	0.231	(B) BRAF Class 3
ETAA1	2p14	1	3.13	0	0.00	0.041	0.233	(A) BRAF Class 1 v12
FOXF1	16q24.1	1	3.13	0	0.00	0.041	0.233	(A) BRAF Class 1 v12
SLFN11	17q12	1	3.13	0	0.00	0.041	0.233	(A) BRAF Class 1 v12
CDKN2A	9p21.3	450	13.73	118	16.32	0.0416	0.233	(B) BRAF Class 3
RMRP	9p13.3	0	0.00	1	100.00	0.0417	0.233	(B) BRAF Class 3
MPL	1p34.2	51	1.62	19	2.71	0.0417	0.233	(B) BRAF Class 3
AKT1	14q32.33	109	3.26	15	2.01	0.0419	0.233	(A) BRAF Class 1 v12
STAT4	2q32.2-q32.3	23	3.39	10	7.09	0.0423	0.234	(B) BRAF Class 3
RPS6KB2	11q13.2	22	1.87	10	3.95	0.0425	0.234	(B) BRAF Class 3
CSDE1	1p13.2	10	1.19	6	3.43	0.0431	0.235	(B) BRAF Class 3
RUNX1	21q22.12	70	2.81	25	4.32	0.0431	0.235	(B) BRAF Class 3
STAT6	12q13.3	17	1.51	9	3.38	0.0442	0.239	(B) BRAF Class 3
NECTIN4	1q23.3	8	1.37	6	4.05	0.0444	0.239	(B) BRAF Class 3
LYN	8q12.1	27	2.63	12	5.08	0.0449	0.239	(B) BRAF Class 3
MAP2K2	19p13.3	32	1.45	14	2.66	0.0452	0.239	(B) BRAF Class 3
PRKAR1A	17q24.2	23	0.93	11	1.90	0.0452	0.239	(B) BRAF Class 3
ADAMTS20	12q12	3	2.56	3	14.29	0.0453	0.239	(B) BRAF Class 3
BCL2L12	19q13.33	11	1.12	7	2.93	0.0453	0.239	(B) BRAF Class 3
PREX2	8q13.2	139	11.99	42	16.15	0.0458	0.239	(B) BRAF Class 3
CDKN2B	9p21.3	209	8.25	62	10.56	0.0459	0.239	(B) BRAF Class 3
NOTCH4	6p21.32	92	6.51	30	9.43	0.0459	0.239	(B) BRAF Class 3
DROSHA	5p13.3	24	4.02	11	7.97	0.0466	0.241	(B) BRAF Class 3
E2F3	6p22.3	10	0.85	6	2.37	0.0479	0.246	(B) BRAF Class 3
KAT6A	8p11.21	68	5.41	24	8.25	0.048	0.246	(B) BRAF Class 3
XRCC1	19q13.31	11	1.70	7	4.35	0.0484	0.247	(B) BRAF Class 3
PIK3C2B	1q32.1	94	6.48	31	9.28	0.0491	0.249	(B) BRAF Class 3
SOX17	8q11.23	55	4.67	19	7.51	0.0495	0.25	(B) BRAF Class 3
COL7A1	3p21.31	94	16.10	33	22.30	0.0511	0.257	(B) BRAF Class 3
NR0B1	Xp21.2	11	1.88	7	4.73	0.0518	0.259	(B) BRAF Class 3
CEBPA	19q13.11	27	1.13	12	2.14	0.0521	0.26	(B) BRAF Class 3
RICTOR	5p13.1	74	3.36	26	5.00	0.0526	0.261	(B) BRAF Class 3
BCL6	3q27.3	57	2.32	21	3.62	0.0547	0.27	(B) BRAF Class 3
DCC	18q21.2	14	5.56	7	12.96	0.0558	0.274	(B) BRAF Class 3
PIK3CG	7q22.3	75	4.88	25	7.23	0.0561	0.274	(B) BRAF Class 3
ERG	21q22.2	63	2.96	23	4.50	0.0563	0.274	(B) BRAF Class 3
EXO1	1q43	14	2.40	8	5.41	0.0565	0.274	(B) BRAF Class 3
CUX1	7q22.1	117	8.19	35	11.22	0.057	0.275	(B) BRAF Class 3
DNMT3B	20q11.21	34	2.89	13	5.14	0.0571	0.275	(B) BRAF Class 3
TENT5C	1p12	37	1.51	15	2.59	0.0574	0.275	(B) BRAF Class 3
HGF	7q21.11	62	3.97	22	6.06	0.0578	0.276	(B) BRAF Class 3
FANCF	11p14.3	10	0.63	6	1.67	0.0582	0.276	(B) BRAF Class 3
INHBA	7p14.1	43	2.96	16	4.91	0.0586	0.277	(B) BRAF Class 3
RIT1	1q22	25	1.28	11	2.43	0.0598	0.282	(B) BRAF Class 3
THBS1	15q14	1	0.85	2	9.52	0.0604	0.283	(B) BRAF Class 3
DOCK8	9p24.3	48	8.22	19	12.84	0.0607	0.283	(B) BRAF Class 3
ZNF521	18q11.2	1	0.82	2	9.09	0.061	0.284	(B) BRAF Class 3
TSC1	9q34.13	81	3.18	27	4.58	0.0646	0.298	(B) BRAF Class 3
INPP4B	4q31.21	32	2.08	13	3.65	0.0647	0.298	(B) BRAF Class 3
TOP1	20q12	27	1.68	11	3.12	0.0655	0.301	(B) BRAF Class 3
GNA11	19p13.3	23	0.71	10	1.37	0.0675	0.309	(B) BRAF Class 3
MUTYH	1p34.1	45	1.83	17	2.93	0.068	0.309	(B) BRAF Class 3
H3F3A	1q42.12	13	0.52	0	0.00	0.0681	0.309	(A) BRAF Class 1 v12
CDH1	16q22.1	74	2.36	24	3.44	0.0701	0.315	(B) BRAF Class 3
AMER1	Xq11.2	64	4.09	22	6.06	0.0704	0.315	(B) BRAF Class 3
POLD1	19q13.33	131	6.37	22	4.51	0.0704	0.315	(A) BRAF Class 1 v12
PTPN14	1q32.3-q41	18	3.08	9	6.08	0.0741	0.328	(B) BRAF Class 3
DDX3X	Xp11.4	3	1.20	3	5.45	0.0743	0.328	(B) BRAF Class 3
EIF1AX	Xp22.12	21	1.53	1	0.33	0.0746	0.328	(A) BRAF Class 1 v12
NIPBL	5p13.2	6	3.61	4	11.43	0.0747	0.328	(B) BRAF Class 3
ARID1B	6q25.3	171	7.20	50	9.14	0.075	0.328	(B) BRAF Class 3
MLH1	3p22.2	53	1.65	18	2.55	0.0753	0.328	(B) BRAF Class 3
MAP3K4	6q26	30	9.01	1	2.08	0.0755	0.328	(A) BRAF Class 1 v12
KEL	7q34	30	5.73	11	10.09	0.0756	0.328	(B) BRAF Class 3
TET1	10q21.3	118	6.40	36	8.51	0.0766	0.33	(B) BRAF Class 3
FGF3	11q13.3	27	1.65	11	2.96	0.0767	0.33	(B) BRAF Class 3
ALOX12B	17p13.1	37	2.25	14	3.71	0.0775	0.33	(B) BRAF Class 3
ARHGAP35	19q13.32	31	4.25	13	7.18	0.0776	0.33	(B) BRAF Class 3
NSD1	5q35.3	126	6.04	39	7.93	0.078	0.33	(B) BRAF Class 3
KDM5C	Xp11.22	80	3.38	27	4.75	0.078	0.33	(B) BRAF Class 3
TFEB	6p21.1	1	0.44	2	4.26	0.0782	0.33	(B) BRAF Class 3
ID3	1p36.12	8	0.35	5	0.95	0.0785	0.33	(B) BRAF Class 3
CDK12	17q12	71	3.22	24	4.62	0.0794	0.332	(B) BRAF Class 3
FAT1	4q35.2	263	12.90	74	15.48	0.0796	0.332	(B) BRAF Class 3
GATA3	10p14	71	2.89	24	4.14	0.0799	0.332	(B) BRAF Class 3
SNCAIP	5q23.2	44	6.68	15	10.56	0.0801	0.332	(B) BRAF Class 3
MAML2	11q21	1	0.39	2	3.64	0.0814	0.335	(B) BRAF Class 3
PDGFB	22q13.1	1	0.39	2	3.64	0.0814	0.335	(B) BRAF Class 3
TBX3	12q24.21	69	4.52	23	6.50	0.0816	0.335	(B) BRAF Class 3
GLI1	12q13.3	115	5.00	35	6.64	0.0824	0.336	(B) BRAF Class 3
MLH3	14q24.3	28	3.47	12	5.94	0.0832	0.338	(B) BRAF Class 3
WWTR1	3q25.1	3	0.50	3	2.16	0.0834	0.338	(B) BRAF Class 3
LZTR1	22q11.21|22q11.1-q11.2	25	3.88	9	7.20	0.084	0.339	(B) BRAF Class 3
CCNE1	19q12	44	1.73	16	2.72	0.0844	0.34	(B) BRAF Class 3
NPRL3	16p13.3	1	0.38	2	3.45	0.0853	0.341	(B) BRAF Class 3
TYK2	19p13.2	6	2.40	4	7.27	0.0854	0.341	(B) BRAF Class 3
AURKB	17p13.1	25	1.02	2	0.34	0.0876	0.347	(A) BRAF Class 1 v12
CRTC1	19p13.11	37	3.64	14	5.86	0.0877	0.347	(B) BRAF Class 3
SESN3	11q21	8	1.52	5	3.94	0.0878	0.347	(B) BRAF Class 3
NSD3	8p11.23	30	2.67	13	4.44	0.088	0.347	(B) BRAF Class 3
USP6	17p13.2	2	1.18	2	7.41	0.0913	0.358	(B) BRAF Class 3
SOS1	2p22.1	38	3.11	15	4.87	0.0937	0.366	(B) BRAF Class 3
MTOR	1p36.22	144	5.52	43	7.01	0.0939	0.366	(B) BRAF Class 3
EP400	12q24.33	5	4.17	3	14.29	0.0975	0.376	(B) BRAF Class 3
HDAC9	7p21.1	3	3.49	3	13.64	0.0976	0.376	(B) BRAF Class 3
MAPK3	16p11.2	20	1.80	1	0.43	0.0976	0.376	(A) BRAF Class 1 v12
POLQ	3q13.33	53	8.18	20	11.76	0.0978	0.376	(B) BRAF Class 3
EXT1	8q24.11	21	2.05	9	3.73	0.0987	0.378	(B) BRAF Class 3
IGF2R	6q25.3	8	2.39	5	5.88	0.0999	0.381	(B) BRAF Class 3
TMPRSS2	21q22.3	40	1.90	15	2.94	0.102	0.386	(B) BRAF Class 3
CASP8	2q33.1	91	4.46	15	3.07	0.102	0.386	(A) BRAF Class 1 v12
RAD50	5q31.1	94	4.32	15	2.98	0.104	0.393	(A) BRAF Class 1 v12
SUFU	10q24.32	45	1.83	16	2.76	0.105	0.393	(B) BRAF Class 3
ESPL1	12q13.13	1	1.16	2	9.09	0.105	0.393	(B) BRAF Class 3
IKZF2	2q34	4	1.81	3	6.38	0.106	0.394	(B) BRAF Class 3
AIP	11q13.2	0	0.00	1	9.09	0.106	0.394	(B) BRAF Class 3
HOXB13	17q21.32	18	0.94	8	1.77	0.106	0.395	(B) BRAF Class 3
COL1A1	17q21.33	4	1.56	3	5.45	0.107	0.397	(B) BRAF Class 3
XRCC6	22q13.2	11	1.88	6	4.05	0.108	0.397	(B) BRAF Class 3
MALT1	18q21.32	17	1.40	7	2.73	0.108	0.398	(B) BRAF Class 3
ACVR1B	12q13.13	10	1.52	5	3.52	0.109	0.399	(B) BRAF Class 3
MEF2B	19p13.11	28	1.14	11	1.90	0.109	0.399	(B) BRAF Class 3
AFF1	4q21.3-q22.1	2	1.64	2	9.09	0.111	0.403	(B) BRAF Class 3
AXIN2	17q24.1	83	4.28	13	2.91	0.113	0.408	(A) BRAF Class 1 v12
NUF2	1q23.3	10	1.90	0	0.00	0.113	0.409	(A) BRAF Class 1 v12
TGFBR2	3p24.1	112	7.15	19	5.23	0.114	0.413	(A) BRAF Class 1 v12
NT5C2	10q24.32-q24.33	11	1.33	6	2.79	0.116	0.415	(B) BRAF Class 3
CIITA	16p13.13	50	5.02	17	7.26	0.116	0.415	(B) BRAF Class 3
FGA	4q31.3	0	0.00	1	20.00	0.116	0.415	(B) BRAF Class 3
EPAS1	2p21	12	2.28	6	4.72	0.117	0.416	(B) BRAF Class 3
ESR2	14q23.2-q23.3	1	0.39	2	2.82	0.118	0.419	(B) BRAF Class 3
CDK6	7q21.2	19	0.75	8	1.36	0.119	0.42	(B) BRAF Class 3
MYB	6q23.3	19	1.20	8	2.18	0.12	0.421	(B) BRAF Class 3
TP53BP1	15q15.3	58	4.92	21	6.82	0.12	0.421	(B) BRAF Class 3
ADGRB3	6q12-q13	3	5.56	2	25.00	0.12	0.421	(B) BRAF Class 3
EFNB3	17p13.1	0	0.00	1	16.67	0.122	0.428	(B) BRAF Class 3
RHOT1	17q11.2	6	1.03	4	2.70	0.123	0.429	(B) BRAF Class 3
NCOA3	20q13.12	52	3.98	16	5.73	0.126	0.436	(B) BRAF Class 3
PRKCZ	1p36.33	5	1.41	3	4.35	0.126	0.436	(B) BRAF Class 3
MAGI2	7q21.11	38	7.69	11	11.96	0.127	0.436	(B) BRAF Class 3
POLB	8p11.21	9	1.54	5	3.38	0.133	0.454	(B) BRAF Class 3
SLC25A13	7q21.3	9	1.54	5	3.38	0.133	0.454	(B) BRAF Class 3
MCM8	20p12.3	15	2.57	7	4.73	0.136	0.463	(B) BRAF Class 3
PARP1	1q42.12	44	3.13	6	1.82	0.136	0.463	(A) BRAF Class 1 v12
PTCH2	1p34.1	6	2.50	4	6.25	0.137	0.463	(B) BRAF Class 3
CDK8	13q12.13	36	1.69	13	2.54	0.137	0.463	(B) BRAF Class 3
CUL3	2q36.2	20	1.31	8	2.25	0.14	0.471	(B) BRAF Class 3
TTYH1	19q13.42	2	1.27	2	6.06	0.14	0.471	(B) BRAF Class 3
BOD1L1	4p15.33	0	0.00	1	12.50	0.143	0.474	(B) BRAF Class 3
PMS2	7p22.1	53	2.14	17	3.00	0.143	0.474	(B) BRAF Class 3
SLX4	16p13.3	97	6.56	16	4.82	0.143	0.474	(A) BRAF Class 1 v12
CDH23	10q22.1	3	6.25	2	25.00	0.144	0.474	(B) BRAF Class 3
CHEK2	22q12.1	60	2.36	19	3.23	0.146	0.474	(B) BRAF Class 3
MST1R	3p21.31	46	3.58	15	5.10	0.146	0.474	(B) BRAF Class 3
RYBP	3p13	8	0.68	4	1.58	0.147	0.474	(B) BRAF Class 3
STAG1	3q22.3	28	4.14	2	1.68	0.148	0.474	(A) BRAF Class 1 v12
PAXIP1	7q36.2	25	4.28	10	6.76	0.148	0.474	(B) BRAF Class 3
ERCC3	2q14.3	39	1.80	13	2.64	0.148	0.474	(B) BRAF Class 3
ELF3	1q32.1	10	1.51	5	3.13	0.149	0.474	(B) BRAF Class 3
FLI1	11q24.3	7	1.64	3	4.35	0.15	0.474	(B) BRAF Class 3
CDK4	12q14.1	43	1.69	6	1.01	0.151	0.474	(A) BRAF Class 1 v12
RECQL4	8q24.3	120	5.58	34	6.91	0.151	0.474	(B) BRAF Class 3
G6PD	Xq28	0	0.00	1	4.76	0.152	0.474	(B) BRAF Class 3
MAGEA1	Xq28	0	0.00	1	4.76	0.152	0.474	(B) BRAF Class 3
MAGI1	3p14.1	0	0.00	1	4.76	0.152	0.474	(B) BRAF Class 3
MMP2	16q12.2	0	0.00	1	4.76	0.152	0.474	(B) BRAF Class 3
USP9X	Xp11.4	0	0.00	1	4.76	0.152	0.474	(B) BRAF Class 3
AKAP9	7q21.2	0	0.00	1	4.55	0.153	0.474	(B) BRAF Class 3
BCL3	19q13.32	0	0.00	1	4.55	0.153	0.474	(B) BRAF Class 3
HOOK3	8p11.21	0	0.00	1	4.55	0.153	0.474	(B) BRAF Class 3
LPP	3q27.3-q28	0	0.00	1	4.55	0.153	0.474	(B) BRAF Class 3
NUMA1	11q13.4	0	0.00	1	4.55	0.153	0.474	(B) BRAF Class 3
PBX1	1q23.3	0	0.00	1	4.55	0.153	0.474	(B) BRAF Class 3
RALGDS	9q34.13-q34.2	0	0.00	1	4.55	0.153	0.474	(B) BRAF Class 3
RTEL1	20q13.33	20	3.78	8	6.30	0.154	0.474	(B) BRAF Class 3
KLF6	10p15.2	0	0.00	1	4.35	0.154	0.474	(B) BRAF Class 3
BTG1	12q21.33	2	0.30	2	1.33	0.154	0.474	(B) BRAF Class 3
NUP98	11p15.4	0	0.00	1	4.00	0.159	0.474	(B) BRAF Class 3
ZMYM2	13q12.11	0	0.00	1	4.55	0.159	0.474	(B) BRAF Class 3
EPHB1	3q22.2	65	4.15	20	5.51	0.16	0.474	(B) BRAF Class 3
LMO3	12p12.3	0	0.00	1	1.45	0.163	0.474	(B) BRAF Class 3
RSPO2	8q23.1	12	1.34	6	2.49	0.163	0.474	(B) BRAF Class 3
PDGFRB	5q32	92	3.62	27	4.58	0.164	0.474	(B) BRAF Class 3
SH2D1A	Xq25	11	0.60	5	1.18	0.164	0.474	(B) BRAF Class 3
NFKBIE	6p21.1	13	1.81	6	3.31	0.164	0.474	(B) BRAF Class 3
CALR	19p13.13	26	1.34	3	0.66	0.167	0.474	(A) BRAF Class 1 v12
ARID5B	10q21.2	50	3.80	15	5.24	0.168	0.474	(B) BRAF Class 3
CDKN2C	1p32.3	14	0.57	6	1.03	0.169	0.474	(B) BRAF Class 3
FAAP100	17q25.3	24	4.11	3	2.03	0.17	0.474	(A) BRAF Class 1 v12
CREBBP	16p13.3	192	7.56	52	8.83	0.171	0.474	(B) BRAF Class 3
PPARG	3p25.2	39	2.20	13	3.13	0.172	0.474	(B) BRAF Class 3
SLC34A2	4p15.2	28	4.11	4	2.25	0.173	0.474	(A) BRAF Class 1 v12
PRKACA	19p13.12	0	0.00	1	2.17	0.173	0.474	(B) BRAF Class 3
HIST1H2BD	6p22.2	9	0.76	0	0.00	0.173	0.474	(A) BRAF Class 1 v12
ASH2L	8p11.23	0	0.00	1	3.03	0.174	0.474	(B) BRAF Class 3
CRCT1	1q21.3	0	0.00	1	3.03	0.174	0.474	(B) BRAF Class 3
LEF1	4q25	0	0.00	1	2.13	0.175	0.474	(B) BRAF Class 3
BCL2L1	20q11.21	11	0.46	5	0.88	0.176	0.474	(B) BRAF Class 3
EPHA5	4q13.1-q13.2	89	4.78	25	6.02	0.176	0.474	(B) BRAF Class 3
EPCAM	2p21	18	0.91	7	1.52	0.176	0.474	(B) BRAF Class 3
MSH2	2p21-p16.3	73	2.96	22	3.81	0.177	0.474	(B) BRAF Class 3
PTEN	10q23.31	352	10.51	69	9.29	0.177	0.474	(A) BRAF Class 1 v12
TCF7L2	10q25.2-q25.3	76	3.40	22	4.36	0.178	0.474	(B) BRAF Class 3
MST1	3p21.31	9	0.81	0	0.00	0.179	0.474	(A) BRAF Class 1 v12
DHX15	4p15.2	14	4.20	4	8.33	0.179	0.474	(B) BRAF Class 3
FOXL2	3q22.3	46	2.08	7	1.35	0.18	0.474	(A) BRAF Class 1 v12
INSIG1	7q36.3	0	0.00	1	1.72	0.181	0.474	(B) BRAF Class 3
MGA	15q15.1	180	9.95	48	11.59	0.182	0.474	(B) BRAF Class 3
MAP3K9	14q24.2	9	4.86	4	10.00	0.182	0.474	(B) BRAF Class 3
ACP2	11p11.2|11p12-p11	0	0.00	1	0.13	0.183	0.474	(B) BRAF Class 3
ARHGEF38	4q24	0	0.00	1	0.13	0.183	0.474	(B) BRAF Class 3
C1ORF147	1q32.1	0	0.00	1	0.13	0.183	0.474	(B) BRAF Class 3
CACNA1C	12p13.33	0	0.00	1	0.13	0.183	0.474	(B) BRAF Class 3
CCHCR1	6p21.33	0	0.00	1	0.13	0.183	0.474	(B) BRAF Class 3
DAP	5p15.2	0	0.00	1	0.13	0.183	0.474	(B) BRAF Class 3
DOCK8-AS1	9p24.3	0	0.00	1	0.13	0.183	0.474	(B) BRAF Class 3
EIF2S3	Xp22.11	0	0.00	1	0.13	0.183	0.474	(B) BRAF Class 3
ENSA	1q21.3	0	0.00	1	0.13	0.183	0.474	(B) BRAF Class 3
FNDC3B	3q26.31	0	0.00	1	0.13	0.183	0.474	(B) BRAF Class 3
GON4L	1q22	0	0.00	1	0.13	0.183	0.474	(B) BRAF Class 3
GPD1	12q13.12	0	0.00	1	0.13	0.183	0.474	(B) BRAF Class 3
HIPK2	7q34	0	0.00	1	0.13	0.183	0.474	(B) BRAF Class 3
IGLJ5	22q11.22	0	0.00	1	0.13	0.183	0.474	(B) BRAF Class 3
INHBE	12q13.3	0	0.00	1	0.13	0.183	0.474	(B) BRAF Class 3
LINC00996	7q36.1	0	0.00	1	0.13	0.183	0.474	(B) BRAF Class 3
LINC01514	10q24.31	0	0.00	1	0.13	0.183	0.474	(B) BRAF Class 3
MIR99AHG	21q21.1	0	0.00	1	0.13	0.183	0.474	(B) BRAF Class 3
NSRP1	17q11.2	0	0.00	1	0.13	0.183	0.474	(B) BRAF Class 3
PAX8-AS1	2q14.1	0	0.00	1	0.13	0.183	0.474	(B) BRAF Class 3
PCMT1	6q25.1	0	0.00	1	0.13	0.183	0.474	(B) BRAF Class 3
PDE4D	5q11.2-q12.1	0	0.00	1	0.13	0.183	0.474	(B) BRAF Class 3
PTTG1IP	21q22.3	0	0.00	1	0.13	0.183	0.474	(B) BRAF Class 3
RAB11FIP4	17q11.2	0	0.00	1	0.13	0.183	0.474	(B) BRAF Class 3
RLF	1p34.2	0	0.00	1	0.13	0.183	0.474	(B) BRAF Class 3
SDHAP3	5p15.33	0	0.00	1	0.13	0.183	0.474	(B) BRAF Class 3
SEPTIN14	7p11.2	0	0.00	1	0.13	0.183	0.474	(B) BRAF Class 3
SNTG1	8q11.21	0	0.00	1	0.13	0.183	0.474	(B) BRAF Class 3
TANC2	17q23.2-q23.3	0	0.00	1	0.13	0.183	0.474	(B) BRAF Class 3
TMIE	3p21.31	0	0.00	1	0.13	0.183	0.474	(B) BRAF Class 3
TRAJ22	14q11.2	0	0.00	1	0.13	0.183	0.474	(B) BRAF Class 3
TTF1	9q34.13	0	0.00	1	0.13	0.183	0.474	(B) BRAF Class 3
TTF2	1p13.1	0	0.00	1	0.13	0.183	0.474	(B) BRAF Class 3
UAP1L1	9q34.3	0	0.00	1	0.13	0.183	0.474	(B) BRAF Class 3
ZFP30	19q13.12	0	0.00	1	0.13	0.183	0.474	(B) BRAF Class 3
ZNF135	19q13.43	0	0.00	1	0.13	0.183	0.474	(B) BRAF Class 3
ZNF284	19q13.31	0	0.00	1	0.13	0.183	0.474	(B) BRAF Class 3
TSHZ3	19q12	2	2.33	2	9.09	0.184	0.474	(B) BRAF Class 3
CDC73	1q31.2	43	1.75	14	2.41	0.184	0.474	(B) BRAF Class 3
SPRED1	15q14	11	1.66	5	3.13	0.185	0.476	(B) BRAF Class 3
MED12	Xq13.1	118	5.36	34	6.46	0.187	0.48	(B) BRAF Class 3
BIRC2	11q22.2	0	0.00	1	3.70	0.188	0.48	(B) BRAF Class 3
ZNF708	19p12	3	0.85	2	2.90	0.189	0.482	(B) BRAF Class 3
SH2B3	12q24.12	61	2.60	10	1.83	0.189	0.482	(A) BRAF Class 1 v12
SMAD4	18q21.2	230	7.01	58	8.02	0.19	0.482	(B) BRAF Class 3
MAPKAP1	9q33.3	5	0.95	3	2.36	0.19	0.482	(B) BRAF Class 3
RPTOR	17q25.3	87	4.10	26	5.09	0.191	0.484	(B) BRAF Class 3
GAB2	11q14.1	3	1.80	2	6.06	0.191	0.484	(B) BRAF Class 3
XPO1	2p15	48	1.89	15	2.55	0.193	0.486	(B) BRAF Class 3
HABP2	10q25.3	17	2.91	7	4.73	0.193	0.486	(B) BRAF Class 3
MAPK1	22q11.22	19	0.79	7	1.27	0.194	0.486	(B) BRAF Class 3
RAC1	7p22.1	51	2.22	16	2.95	0.195	0.488	(B) BRAF Class 3
ERCC5	13q33.1	73	3.36	21	4.27	0.196	0.489	(B) BRAF Class 3
AXIN1	16p13.3	56	3.69	9	2.58	0.196	0.489	(A) BRAF Class 1 v12
TAL1	1p33	11	1.61	5	2.94	0.197	0.489	(B) BRAF Class 3
FGF23	12p13.32	9	1.27	4	2.53	0.199	0.489	(B) BRAF Class 3
NCOA2	8q13.3	6	2.33	3	5.45	0.199	0.489	(B) BRAF Class 3
MAP2K1	15q22.31	71	2.63	21	3.33	0.2	0.489	(B) BRAF Class 3
CD79B	17q23.3	15	0.61	6	1.03	0.201	0.489	(B) BRAF Class 3
EML4	2p21	13	3.00	4	5.71	0.201	0.489	(B) BRAF Class 3
DDX31	9q34.13	1	1.08	1	9.09	0.201	0.489	(B) BRAF Class 3
FRK	6q22.1	1	1.08	1	9.09	0.201	0.489	(B) BRAF Class 3
KRIT1	7q21.2	1	1.08	1	9.09	0.201	0.489	(B) BRAF Class 3
FANCG	9p13.3	26	1.61	9	2.39	0.201	0.489	(B) BRAF Class 3
ATR	3q23	125	5.66	35	6.73	0.202	0.489	(B) BRAF Class 3
UIMC1	5q35.2	14	2.31	6	3.90	0.203	0.489	(B) BRAF Class 3
TEX12	11q23.1	0	0.00	1	1.06	0.203	0.489	(B) BRAF Class 3
HSPA2	14q23.3	0	0.00	1	4.55	0.204	0.489	(B) BRAF Class 3
SOX2	3q26.33	33	1.34	11	1.90	0.204	0.489	(B) BRAF Class 3
SRY	Yp11.2	0	0.00	1	0.65	0.204	0.489	(B) BRAF Class 3
NSD2	4p16.3	44	3.24	15	4.31	0.204	0.489	(B) BRAF Class 3
BTK	Xq22.1	27	1.65	9	2.43	0.205	0.489	(B) BRAF Class 3
ETV6	12p13.2	51	2.09	16	2.75	0.205	0.489	(B) BRAF Class 3
PPP6C	9q33.3	43	3.39	6	2.19	0.205	0.489	(A) BRAF Class 1 v12
ANKRD11	16q24.3	87	7.84	14	6.01	0.206	0.489	(A) BRAF Class 1 v12
BRCA2	13q13.1	203	8.00	54	9.12	0.206	0.489	(B) BRAF Class 3
RAD54L	1p34.1	19	1.45	2	0.65	0.207	0.491	(A) BRAF Class 1 v12
UPF1	19p13.11	15	2.85	6	4.72	0.208	0.491	(B) BRAF Class 3
SOS2	14q21.3	3	1.91	2	6.06	0.208	0.492	(B) BRAF Class 3
ETV4	17q21.31	19	1.30	2	0.58	0.209	0.493	(A) BRAF Class 1 v12
PRSS8	16p11.2	7	1.36	3	3.03	0.21	0.494	(B) BRAF Class 3
WT1	11p13	68	2.73	12	2.03	0.21	0.494	(A) BRAF Class 1 v12
CD70	19p13.3	0	0.00	1	3.23	0.211	0.494	(B) BRAF Class 3
MLLT3	9p21.3	9	2.47	3	5.26	0.213	0.498	(B) BRAF Class 3
SDHA	5p15.33	71	3.11	21	3.89	0.215	0.499	(B) BRAF Class 3
ASXL2	2p23.3	58	4.41	9	3.15	0.215	0.499	(A) BRAF Class 1 v12
CSF3R	1p34.3	52	2.35	16	3.05	0.216	0.501	(B) BRAF Class 3
RPS6KB1	17q23.1	5	1.50	2	4.17	0.216	0.501	(B) BRAF Class 3
INSRR	1q23.1	6	0.18	3	0.40	0.217	0.502	(B) BRAF Class 3
CRLF2	Xp22.33 and Yp11.2	31	1.31	10	1.85	0.222	0.511	(B) BRAF Class 3
ADGRA2	8p11.23	35	5.63	10	7.81	0.223	0.513	(B) BRAF Class 3
GNA13	17q24.1	3	0.42	2	1.26	0.224	0.513	(B) BRAF Class 3
FANCM	14q21.2	40	5.34	14	7.04	0.224	0.513	(B) BRAF Class 3
ABL1	9q34.12	88	2.80	24	3.41	0.224	0.513	(B) BRAF Class 3
FGF4	11q13.3	29	1.86	4	1.10	0.225	0.513	(A) BRAF Class 1 v12
HELQ	4q21.23	17	2.91	2	1.35	0.226	0.513	(A) BRAF Class 1 v12
DIS3	13q21.33	71	3.00	21	3.71	0.226	0.513	(B) BRAF Class 3
GRM8	7q31.33	4	3.42	2	9.52	0.226	0.513	(B) BRAF Class 3
SLITRK6	13q31.1	12	3.67	5	6.25	0.227	0.513	(B) BRAF Class 3
AR	Xq12	120	4.73	33	5.55	0.23	0.52	(B) BRAF Class 3
ERF	19q13.2	9	1.71	4	3.15	0.234	0.528	(B) BRAF Class 3
CHEK1	11q24.2	27	1.22	9	1.73	0.236	0.53	(B) BRAF Class 3
FYN	6q21	26	2.07	8	2.99	0.237	0.531	(B) BRAF Class 3
PIK3CD	1p36.22	38	2.99	11	4.01	0.238	0.533	(B) BRAF Class 3
EP300	22q13.2	172	6.99	46	7.93	0.24	0.535	(B) BRAF Class 3
POLE	12q24.33	161	7.29	43	8.30	0.24	0.535	(B) BRAF Class 3
IKZF3	17q12-q21.1	7	1.26	3	2.59	0.241	0.536	(B) BRAF Class 3
IDH1	2q34	80	2.39	14	1.88	0.241	0.536	(A) BRAF Class 1 v12
DOT1L	19p13.3	78	5.00	22	6.06	0.242	0.536	(B) BRAF Class 3
CD274	9p24.1	20	0.83	7	1.24	0.242	0.536	(B) BRAF Class 3
DEPDC5	22q12.2-q12.3	13	4.94	1	1.72	0.245	0.54	(A) BRAF Class 1 v12
HIST1H1C	6p22.2	25	2.00	3	1.12	0.245	0.54	(A) BRAF Class 1 v12
PHOX2B	4p13	48	2.08	14	2.67	0.246	0.542	(B) BRAF Class 3
GATA4	8p23.1	32	2.26	10	3.07	0.247	0.543	(B) BRAF Class 3
WRN	8p12	54	4.66	16	5.84	0.249	0.545	(B) BRAF Class 3
NUTM1	15q14	29	5.05	8	7.08	0.251	0.549	(B) BRAF Class 3
CDC42	1p36.12	3	0.45	2	1.25	0.252	0.549	(B) BRAF Class 3
PTCH1	9q22.32	132	5.20	26	4.41	0.252	0.549	(A) BRAF Class 1 v12
JUN	1p32.1	23	1.61	3	0.91	0.253	0.55	(A) BRAF Class 1 v12
HSP90AA1	14q32.31	8	1.50	3	2.94	0.254	0.55	(B) BRAF Class 3
MYCN	2p24.3	43	1.69	13	2.18	0.254	0.55	(B) BRAF Class 3
PRAME	22q11.22	4	1.13	2	2.90	0.254	0.55	(B) BRAF Class 3
GSK3B	3q13.33	17	1.09	6	1.65	0.257	0.554	(B) BRAF Class 3
TOP2A	17q21.2	32	5.09	4	3.20	0.259	0.558	(A) BRAF Class 1 v12
FUS	16p11.2	16	1.51	6	2.28	0.259	0.558	(B) BRAF Class 3
PTK2	8q24.3	8	2.26	3	4.35	0.261	0.559	(B) BRAF Class 3
KCNQ1	11p15.5-p15.4	26	4.45	9	6.08	0.262	0.56	(B) BRAF Class 3
HIST1H3D	6p22.2	7	0.63	0	0.00	0.262	0.56	(A) BRAF Class 1 v12
FGF12	3q28-q29	0	0.00	1	1.82	0.263	0.56	(B) BRAF Class 3
TIPARP	3q25.31	0	0.00	1	1.82	0.263	0.56	(B) BRAF Class 3
IRF4	6p25.3	21	1.34	7	1.93	0.264	0.561	(B) BRAF Class 3
PPP2R2A	8p21.2	8	2.20	0	0.00	0.265	0.561	(A) BRAF Class 1 v12
GPS2	17p13.1	13	1.15	1	0.41	0.267	0.564	(A) BRAF Class 1 v12
GBA	1q22	6	1.03	3	2.03	0.267	0.564	(B) BRAF Class 3
FAT3	11q14.3	21	8.11	8	11.27	0.268	0.564	(B) BRAF Class 3
TSHZ2	20q13.2	3	3.49	2	9.09	0.268	0.565	(B) BRAF Class 3
INPP4A	2q11.2	23	1.95	7	2.77	0.27	0.567	(B) BRAF Class 3
ECT2L	6q24.1	1	1.00	1	5.88	0.271	0.567	(B) BRAF Class 3
PLCG2	16q23.3	51	3.92	14	4.90	0.272	0.569	(B) BRAF Class 3
CIC	19q13.2	148	6.95	40	7.83	0.273	0.57	(B) BRAF Class 3
IL6ST	5q11.2	1	0.50	1	2.86	0.274	0.571	(B) BRAF Class 3
DNMT3A	2p23.3	126	5.06	34	5.76	0.275	0.572	(B) BRAF Class 3
ERCC1	19q13.32	7	0.66	3	1.25	0.276	0.574	(B) BRAF Class 3
LATS2	13q12.11	48	4.00	13	5.02	0.277	0.574	(B) BRAF Class 3
MDM4	1q32.1	29	1.14	9	1.53	0.278	0.574	(B) BRAF Class 3
SSX2	Xp11.22	1	1.75	1	10.00	0.278	0.574	(B) BRAF Class 3
GLI3	7p14.1	26	7.34	7	10.14	0.281	0.578	(B) BRAF Class 3
ACVR2A	2q22.3-q23.1	1	0.85	1	4.76	0.282	0.578	(B) BRAF Class 3
TAF1L	9p21.1	1	0.85	1	4.76	0.282	0.578	(B) BRAF Class 3
TGM7	15q15.2-q15.3	1	0.85	1	4.76	0.282	0.578	(B) BRAF Class 3
CYSLTR2	13q14.2	7	1.07	3	1.99	0.282	0.578	(B) BRAF Class 3
HLF	17q22	1	0.82	1	4.55	0.283	0.578	(B) BRAF Class 3
ACVR1	2q24.1	22	1.18	7	1.64	0.284	0.578	(B) BRAF Class 3
CRTC2	1q21.3	7	1.98	0	0.00	0.285	0.578	(A) BRAF Class 1 v12
PRF1	10q22.1	31	3.33	5	2.27	0.285	0.578	(A) BRAF Class 1 v12
FUBP1	1p31.1	27	1.79	4	1.15	0.286	0.578	(A) BRAF Class 1 v12
GLI2	2q14.2	79	7.52	22	8.80	0.286	0.578	(B) BRAF Class 3
SMARCAL1	2q35	2	2.15	1	9.09	0.287	0.58	(B) BRAF Class 3
MRE11	11q21	56	2.54	16	3.08	0.288	0.58	(B) BRAF Class 3
ZNRF3	22q12.1	41	5.85	8	4.40	0.288	0.58	(A) BRAF Class 1 v12
RINT1	7q22.3	13	2.23	5	3.38	0.29	0.583	(B) BRAF Class 3
INSR	19p13.2	57	4.31	10	3.37	0.291	0.583	(A) BRAF Class 1 v12
CBFB	16q22.1	16	0.76	2	0.39	0.291	0.583	(A) BRAF Class 1 v12
MITF	3p13	64	2.60	18	3.10	0.292	0.583	(B) BRAF Class 3
EMSY	11q13.5	15	2.12	5	3.16	0.293	0.583	(B) BRAF Class 3
NAV3	12q21.2	8	5.10	3	9.09	0.293	0.583	(B) BRAF Class 3
FANCI	15q26.1	47	4.13	8	3.13	0.294	0.583	(A) BRAF Class 1 v12
AFDN	6q27	1	0.86	1	4.55	0.294	0.583	(B) BRAF Class 3
RBM15	1p13.3	1	0.86	1	4.55	0.294	0.583	(B) BRAF Class 3
DMD	Xp21.2-p21.1	13	3.67	4	5.80	0.295	0.583	(B) BRAF Class 3
MYD88	3p22.2	31	1.21	5	0.84	0.298	0.587	(A) BRAF Class 1 v12
RSPO3	6q22.33	20	2.56	3	1.55	0.299	0.587	(A) BRAF Class 1 v12
PNRC1	6q15	17	1.05	2	0.56	0.299	0.587	(A) BRAF Class 1 v12
MBD4	3q21.3	15	2.57	2	1.35	0.299	0.587	(A) BRAF Class 1 v12
SMO	7q32.1	102	3.20	26	3.66	0.301	0.588	(B) BRAF Class 3
LATS1	6q25.1	24	2.04	7	2.77	0.301	0.588	(B) BRAF Class 3
BAP1	3p21.1	64	2.52	12	2.04	0.303	0.589	(A) BRAF Class 1 v12
MYH9	22q12.3	8	3.11	3	5.45	0.303	0.589	(B) BRAF Class 3
NPM1	5q35.1	22	0.71	3	0.43	0.303	0.589	(A) BRAF Class 1 v12
IRS2	13q34	78	4.98	21	5.79	0.304	0.589	(B) BRAF Class 3
RBBP8	18q11.2	31	5.31	10	6.76	0.305	0.589	(B) BRAF Class 3
TGFBR1	9q22.33	20	1.70	6	2.37	0.305	0.589	(B) BRAF Class 3
TSHR	14q31.1	57	2.64	16	3.16	0.305	0.589	(B) BRAF Class 3
SOX9	17q24.3	109	4.55	29	5.14	0.305	0.589	(B) BRAF Class 3
ZNF217	20q13.2	54	3.37	10	2.67	0.306	0.589	(A) BRAF Class 1 v12
ICOSLG	21q22.3	16	1.36	5	1.98	0.308	0.589	(B) BRAF Class 3
UROD	1p34.1	10	1.71	4	2.70	0.308	0.589	(B) BRAF Class 3
NBN	8q21.3	77	3.05	15	2.55	0.309	0.589	(A) BRAF Class 1 v12
CBFA2T3	16q24.3	24	4.07	8	5.37	0.309	0.589	(B) BRAF Class 3
CSF1R	5q32	63	2.46	16	2.92	0.309	0.589	(B) BRAF Class 3
STK40	1p34.3	12	1.02	4	1.58	0.309	0.589	(B) BRAF Class 3
ZMYM3	Xq13.1	6	2.71	0	0.00	0.311	0.591	(A) BRAF Class 1 v12
NKX2-1	14q13.3	58	2.36	11	1.90	0.311	0.591	(A) BRAF Class 1 v12
U2AF1	21q22.3	38	1.51	11	1.88	0.313	0.593	(B) BRAF Class 3
EME1	17q21.33	10	1.71	1	0.68	0.314	0.593	(A) BRAF Class 1 v12
PTPN1	20q13.13	1	0.59	1	2.86	0.314	0.593	(B) BRAF Class 3
BCR	22q11.23	22	3.82	3	2.38	0.315	0.593	(A) BRAF Class 1 v12
AURKA	20q13.2	26	1.06	8	1.38	0.316	0.593	(B) BRAF Class 3
ETV1	7p21.2	58	2.55	16	3.02	0.316	0.593	(B) BRAF Class 3
PAK3	Xq23	17	2.48	5	3.55	0.317	0.593	(B) BRAF Class 3
XBP1	22q12.1|22q12	1	0.45	1	2.13	0.317	0.593	(B) BRAF Class 3
IPMK	10q21.1	1	0.64	1	3.03	0.318	0.593	(B) BRAF Class 3
SHH	7q36.3	1	0.64	1	3.03	0.318	0.593	(B) BRAF Class 3
SPRY2	13q31.1	1	0.64	1	3.03	0.318	0.593	(B) BRAF Class 3
ATF1	12q13.12	1	0.39	1	1.82	0.322	0.596	(B) BRAF Class 3
DDIT3	12q13.3	1	0.39	1	1.82	0.322	0.596	(B) BRAF Class 3
EGLN1	1q42.2	5	0.86	0	0.00	0.322	0.596	(A) BRAF Class 1 v12
ID4	6p22.3	5	0.86	0	0.00	0.322	0.596	(A) BRAF Class 1 v12
PLAG1	8q12.1	1	0.38	1	1.75	0.322	0.596	(B) BRAF Class 3
PIM1	6p21.2	19	0.86	6	1.18	0.323	0.596	(B) BRAF Class 3
FGFR3	4p16.3	91	2.72	23	3.10	0.325	0.598	(B) BRAF Class 3
PHF6	Xq26.2	20	1.33	6	1.80	0.325	0.598	(B) BRAF Class 3
TAF1	Xq13.1	28	5.31	7	6.93	0.326	0.598	(B) BRAF Class 3
NAB2	12q13.3	13	3.90	3	6.25	0.327	0.599	(B) BRAF Class 3
AKT3	1q43-q44	35	1.36	6	1.01	0.327	0.599	(A) BRAF Class 1 v12
DDB2	11p11.2	15	1.46	5	2.07	0.328	0.599	(B) BRAF Class 3
SMARCB1	22q11.23|22q11	41	1.27	11	1.56	0.328	0.599	(B) BRAF Class 3
FMC1-LUC7L2	7q34	1	0.03	1	0.13	0.332	0.602	(B) BRAF Class 3
MT-ND6	-	1	0.03	1	0.13	0.332	0.602	(B) BRAF Class 3
SOX10	22q13.1	13	1.91	4	2.84	0.333	0.602	(B) BRAF Class 3
FGF8	10q24.32	2	0.60	1	2.08	0.333	0.602	(B) BRAF Class 3
AGO2	8q24.3	26	4.94	8	6.30	0.334	0.602	(B) BRAF Class 3
RAD52	12p13.33	24	1.28	4	0.88	0.334	0.602	(A) BRAF Class 1 v12
BCL10	1p22.3	17	1.41	5	1.96	0.334	0.602	(B) BRAF Class 3
BABAM2	2p23.2	14	2.40	5	3.38	0.335	0.602	(B) BRAF Class 3
GATA1	Xp11.23	20	1.27	6	1.70	0.336	0.603	(B) BRAF Class 3
RARA	17q21.2	43	1.75	8	1.38	0.34	0.61	(A) BRAF Class 1 v12
KLLN	10q23.31	14	2.40	2	1.35	0.341	0.611	(A) BRAF Class 1 v12
ARHGEF12	11q23.3	25	4.24	8	5.37	0.342	0.612	(B) BRAF Class 3
KIF1B	1p36.22	27	4.62	5	3.38	0.344	0.615	(A) BRAF Class 1 v12
INHA	2q35	22	1.98	3	1.29	0.345	0.615	(A) BRAF Class 1 v12
TCF3	19p13.3	66	3.12	17	3.58	0.349	0.62	(B) BRAF Class 3
DIS3L2	2q37.1	19	2.90	3	1.89	0.349	0.62	(A) BRAF Class 1 v12
NEIL2	8p23.1	4	0.68	2	1.35	0.35	0.621	(B) BRAF Class 3
NR4A3	9q31.1	2	1.24	1	4.00	0.353	0.625	(B) BRAF Class 3
XIAP	Xq25	13	1.10	4	1.58	0.353	0.625	(B) BRAF Class 3
KNSTRN	15q15.1	20	2.70	3	1.78	0.355	0.626	(A) BRAF Class 1 v12
KLF4	9q31.2	34	1.75	6	1.34	0.356	0.627	(A) BRAF Class 1 v12
DNMT1	19p13.2	53	4.04	13	4.69	0.36	0.633	(B) BRAF Class 3
YAP1	11q22.1	28	1.49	8	1.84	0.362	0.635	(B) BRAF Class 3
PDE4DIP	1q21.2	6	4.92	0	0.00	0.363	0.636	(A) BRAF Class 1 v12
SHOC2	10q25.2	8	1.52	3	2.36	0.364	0.636	(B) BRAF Class 3
SMYD3	1q44	8	1.52	3	2.36	0.364	0.636	(B) BRAF Class 3
PHF1	6p21.32	5	0.15	0	0.00	0.364	0.636	(A) BRAF Class 1 v12
NRIP1	21q11.2-q21.1	3	3.23	1	9.09	0.365	0.636	(B) BRAF Class 3
MYC	8q24.21	89	3.46	23	3.83	0.366	0.636	(B) BRAF Class 3
PIK3CB	3q22.3	46	3.11	12	3.63	0.366	0.636	(B) BRAF Class 3
KLHL6	3q27.1	21	2.92	6	3.75	0.367	0.636	(B) BRAF Class 3
NEIL1	15q24.2	9	1.54	1	0.68	0.368	0.636	(A) BRAF Class 1 v12
TDG	12q23.3	9	1.54	1	0.68	0.368	0.636	(A) BRAF Class 1 v12
EPHB4	7q22.1	4	1.33	2	2.50	0.369	0.637	(B) BRAF Class 3
RAD51	15q15.1	19	0.87	3	0.58	0.37	0.637	(A) BRAF Class 1 v12
RECQL	12p12.1	14	2.66	2	1.57	0.37	0.637	(A) BRAF Class 1 v12
EGR1	5q31.2	1	0.87	1	3.33	0.372	0.638	(B) BRAF Class 3
KMT2B	19q13.12	121	11.66	28	12.67	0.372	0.638	(B) BRAF Class 3
MDC1	6p21.33	66	5.60	16	6.32	0.373	0.638	(B) BRAF Class 3
GEN1	2p24.2	24	2.31	4	1.67	0.375	0.638	(A) BRAF Class 1 v12
SDHAF2	11q12.2	10	0.45	1	0.20	0.375	0.638	(A) BRAF Class 1 v12
BUB1B	15q15.1	24	2.34	7	2.90	0.375	0.638	(B) BRAF Class 3
GPC3	Xq26.2	20	1.77	6	2.26	0.375	0.638	(B) BRAF Class 3
FGF6	12p13.32	10	1.41	1	0.63	0.376	0.638	(A) BRAF Class 1 v12
PRKCI	3q26.2	48	2.50	13	2.87	0.376	0.638	(B) BRAF Class 3
PIK3C3	18q12.3	33	2.52	9	3.01	0.377	0.638	(B) BRAF Class 3
SS18	18q11.2	8	1.01	3	1.52	0.377	0.638	(B) BRAF Class 3
EWSR1	22q12.2	28	1.75	8	2.13	0.378	0.638	(B) BRAF Class 3
TRRAP	7q22.1	1	0.45	1	1.67	0.378	0.639	(B) BRAF Class 3
FKBP9	7p14.3	6	1.69	2	2.90	0.385	0.646	(B) BRAF Class 3
TFE3	Xp11.23	30	2.63	8	3.16	0.385	0.646	(B) BRAF Class 3
CENPA	2p23.3	5	0.45	0	0.00	0.385	0.646	(A) BRAF Class 1 v12
CDKN1C	11p15.4	5	0.51	2	0.88	0.389	0.651	(B) BRAF Class 3
RAD51B	14q24.1	13	0.93	4	1.26	0.39	0.651	(B) BRAF Class 3
CARM1	19p13.2	9	1.71	1	0.79	0.391	0.651	(A) BRAF Class 1 v12
PIK3R2	19p13.11	34	2.21	9	2.60	0.392	0.651	(B) BRAF Class 3
UBR5	8q22.3	2	1.49	1	4.17	0.392	0.651	(B) BRAF Class 3
DKC1	Xq28	8	1.37	3	2.01	0.393	0.651	(B) BRAF Class 3
DNAJB1	19p13.12	14	1.07	4	1.43	0.393	0.651	(B) BRAF Class 3
CTNNA1	5q31.2	28	2.19	8	2.61	0.393	0.651	(B) BRAF Class 3
BCL9	1q21.2	2	1.64	1	4.55	0.394	0.651	(B) BRAF Class 3
CDH11	16q21	2	1.64	1	4.55	0.394	0.651	(B) BRAF Class 3
TRIM33	1p13.2	2	1.64	1	4.55	0.394	0.651	(B) BRAF Class 3
FRS2	12q15	6	0.95	2	1.59	0.396	0.652	(B) BRAF Class 3
FIP1L1	4q12	2	1.30	1	3.57	0.396	0.652	(B) BRAF Class 3
CHD5	1p36.31	10	6.37	3	9.09	0.4	0.657	(B) BRAF Class 3
PRDM1	6q21	90	3.66	23	3.97	0.401	0.657	(B) BRAF Class 3
SMARCE1	17q21.2	5	0.74	2	1.23	0.403	0.657	(B) BRAF Class 3
BRD3	9q34.2	30	4.33	6	3.49	0.404	0.657	(A) BRAF Class 1 v12
OGG1	3p25.3	4	0.68	0	0.00	0.404	0.657	(A) BRAF Class 1 v12
UBE2T	1q32.1	4	0.68	0	0.00	0.404	0.657	(A) BRAF Class 1 v12
STAT5B	17q21.2	37	3.11	9	3.60	0.404	0.657	(B) BRAF Class 3
DNAH9	17p12	6	8.70	2	14.29	0.405	0.657	(B) BRAF Class 3
HIST1H3E	6p22.2	10	0.90	1	0.43	0.405	0.657	(A) BRAF Class 1 v12
GATA2	3q21.3	50	2.30	10	1.98	0.406	0.657	(A) BRAF Class 1 v12
LAMP1	13q34	6	1.40	0	0.00	0.406	0.657	(A) BRAF Class 1 v12
SDHD	11q23.1	9	0.37	3	0.52	0.406	0.657	(B) BRAF Class 3
LIG4	13q33.3	21	3.60	4	2.70	0.407	0.657	(A) BRAF Class 1 v12
RRAGC	1p34.3	5	0.75	2	1.25	0.407	0.657	(B) BRAF Class 3
RELA	11q13.1	16	2.05	5	2.58	0.408	0.657	(B) BRAF Class 3
TAP2	6p21.32	5	0.95	2	1.57	0.408	0.657	(B) BRAF Class 3
MUS81	11q13.1	12	2.05	4	2.70	0.411	0.66	(B) BRAF Class 3
RANBP2	2q13	56	11.34	9	9.78	0.412	0.66	(A) BRAF Class 1 v12
IRF2	4q35.1	6	1.15	2	1.83	0.413	0.662	(B) BRAF Class 3
CDK1	10q21.2	2	0.56	1	1.45	0.415	0.662	(B) BRAF Class 3
PDCD1LG2	9p24.1	25	1.21	7	1.43	0.415	0.662	(B) BRAF Class 3
FOXP1	3p13	35	2.32	9	2.66	0.415	0.662	(B) BRAF Class 3
HIST1H3G	6p22.2	6	0.54	2	0.86	0.416	0.663	(B) BRAF Class 3
HIST1H3I	6p22.1	6	0.54	2	0.86	0.417	0.664	(B) BRAF Class 3
TNFAIP3	6q23.3	58	2.36	15	2.59	0.42	0.667	(B) BRAF Class 3
RAD51C	17q22	25	1.15	7	1.35	0.421	0.667	(B) BRAF Class 3
SDHC	1q23.3	18	0.76	3	0.54	0.422	0.667	(A) BRAF Class 1 v12
RAD51D	17q12	21	0.96	6	1.16	0.422	0.667	(B) BRAF Class 3
PRKN	6q26	79	3.29	20	3.55	0.423	0.668	(B) BRAF Class 3
FAN1	15q13.3	16	2.74	5	3.38	0.424	0.668	(B) BRAF Class 3
IGF1R	15q26.3	111	4.32	24	4.03	0.425	0.668	(A) BRAF Class 1 v12
KMT2C	7q36.1	184	12.65	42	13.21	0.425	0.668	(B) BRAF Class 3
PAX3	2q36.1	11	1.94	1	0.97	0.428	0.67	(A) BRAF Class 1 v12
STAT3	17q21.2	45	1.84	9	1.59	0.428	0.67	(A) BRAF Class 1 v12
KLF2	19p13.11	8	1.37	1	0.68	0.428	0.67	(A) BRAF Class 1 v12
BIRC3	11q22.2	15	1.24	4	1.56	0.429	0.67	(B) BRAF Class 3
RNF8	6p21.2	5	0.86	2	1.35	0.43	0.671	(B) BRAF Class 3
RXRA	9q34.2	17	3.23	3	2.36	0.433	0.674	(A) BRAF Class 1 v12
USP28	11q23.2	20	3.42	6	4.05	0.434	0.674	(B) BRAF Class 3
NTHL1	16p13.3	9	0.78	3	1.05	0.435	0.674	(B) BRAF Class 3
POLR2A	17p13.1	4	4.30	1	9.09	0.435	0.674	(B) BRAF Class 3
SAMD9L	7q21.2	4	4.30	1	9.09	0.435	0.674	(B) BRAF Class 3
AKT2	19q13.2	49	1.90	10	1.68	0.437	0.675	(A) BRAF Class 1 v12
CD276	15q24.1	19	1.61	3	1.19	0.437	0.675	(A) BRAF Class 1 v12
BRCC3	Xq28	12	2.02	2	1.33	0.439	0.678	(A) BRAF Class 1 v12
KCNIP1	5q35.1	6	2.28	2	3.45	0.44	0.678	(B) BRAF Class 3
BRD4	19p13.12	126	5.23	28	4.95	0.442	0.679	(A) BRAF Class 1 v12
SHQ1	3p13	24	2.04	6	2.37	0.442	0.679	(B) BRAF Class 3
MYOD1	11p15.1	29	2.32	5	1.89	0.442	0.679	(A) BRAF Class 1 v12
SOCS1	16p13.13	26	1.06	5	0.86	0.443	0.679	(A) BRAF Class 1 v12
STAT5A	17q21.2	20	1.70	5	2.02	0.443	0.679	(B) BRAF Class 3
ZFHX3	16q22.2-q22.3	152	12.22	31	11.65	0.446	0.682	(A) BRAF Class 1 v12
SRSF2	17q25.1	27	1.20	7	1.37	0.447	0.682	(B) BRAF Class 3
RACK1	5q35.3	4	1.52	0	0.00	0.449	0.684	(A) BRAF Class 1 v12
CDKN1B	12p13.1	35	1.38	7	1.19	0.449	0.684	(A) BRAF Class 1 v12
DUSP4	8p12	8	1.21	1	0.63	0.451	0.685	(A) BRAF Class 1 v12
MSI1	12q24.31	8	1.52	1	0.79	0.452	0.686	(A) BRAF Class 1 v12
LTK	15q15.1	3	1.30	0	0.00	0.454	0.686	(A) BRAF Class 1 v12
BORCS8-MEF2B	19p13.11	19	0.57	5	0.67	0.454	0.686	(B) BRAF Class 3
CAMK1	3p25.3	2	0.06	1	0.13	0.454	0.686	(B) BRAF Class 3
TRBC2	7q34	2	0.06	1	0.13	0.454	0.686	(B) BRAF Class 3
TRAF2	9q34.3	25	2.13	6	2.43	0.457	0.688	(B) BRAF Class 3
HNF1A	12q24.31	106	3.35	22	3.17	0.457	0.688	(A) BRAF Class 1 v12
RAD21	8q24.11	57	2.51	12	2.29	0.458	0.688	(A) BRAF Class 1 v12
FANCB	Xp22.2	20	2.99	4	2.40	0.458	0.688	(A) BRAF Class 1 v12
FGF5	4q21.21	10	3.00	2	4.17	0.46	0.688	(B) BRAF Class 3
HIST1H3B	6p22.2	19	0.91	5	1.06	0.46	0.688	(B) BRAF Class 3
KDM5A	12p13.33	120	5.68	30	5.89	0.46	0.688	(B) BRAF Class 3
FAH	15q25.1	13	2.23	4	2.70	0.461	0.688	(B) BRAF Class 3
GABRA6	5q34	16	3.05	4	3.67	0.461	0.688	(B) BRAF Class 3
KDM6B	17p13.1	20	5.51	3	4.23	0.463	0.69	(A) BRAF Class 1 v12
FOXA1	14q21.1	39	1.98	8	1.75	0.464	0.691	(A) BRAF Class 1 v12
TNFRSF14	1p36.32	17	1.09	3	0.83	0.465	0.691	(A) BRAF Class 1 v12
LMO1	11p15.4	17	0.75	3	0.57	0.466	0.692	(A) BRAF Class 1 v12
TGFB1	19q13.2	3	6.25	1	12.50	0.47	0.695	(B) BRAF Class 3
GNAQ	9q21.2	28	0.86	7	0.95	0.471	0.695	(B) BRAF Class 3
CCND1	11q13.3	34	1.34	7	1.18	0.471	0.695	(A) BRAF Class 1 v12
BRINP3	1q31.1	5	4.20	0	0.00	0.471	0.695	(A) BRAF Class 1 v12
LMO2	11p13	6	0.65	2	0.92	0.472	0.695	(B) BRAF Class 3
IKBKE	1q32.1	23	1.47	6	1.65	0.472	0.695	(B) BRAF Class 3
MAP2K4	17p12	40	1.58	10	1.70	0.473	0.695	(B) BRAF Class 3
BCL11B	14q32.2	32	4.59	7	4.05	0.473	0.695	(A) BRAF Class 1 v12
DDB1	11q12.2	21	3.60	6	4.05	0.474	0.695	(B) BRAF Class 3
PDCD1	2q37.3	33	2.57	8	2.81	0.475	0.695	(B) BRAF Class 3
ERCC2	19q13.32	75	3.01	18	3.15	0.477	0.695	(B) BRAF Class 3
FH	1q43	48	1.97	12	2.09	0.477	0.695	(B) BRAF Class 3
MTA1	14q32.33	25	4.28	7	4.73	0.478	0.695	(B) BRAF Class 3
RHBDF2	17q25.1	25	4.28	7	4.73	0.478	0.695	(B) BRAF Class 3
CCND3	6p21.1	21	0.83	4	0.68	0.478	0.695	(A) BRAF Class 1 v12
NCOR1	17p12-p11.2	79	5.33	17	5.04	0.478	0.695	(A) BRAF Class 1 v12
SPEN	1p36.21-p36.13	142	9.10	32	8.82	0.479	0.695	(A) BRAF Class 1 v12
FANCL	2p16.1	16	1.26	3	0.98	0.481	0.695	(A) BRAF Class 1 v12
BCORL1	Xq26.1	116	7.16	28	7.37	0.481	0.695	(B) BRAF Class 3
MSI2	17q22	6	1.14	2	1.57	0.481	0.695	(B) BRAF Class 3
XPA	9q22.33	12	1.17	2	0.83	0.484	0.695	(A) BRAF Class 1 v12
FGF7	15q21.2	4	0.92	0	0.00	0.485	0.695	(A) BRAF Class 1 v12
CDK2	12q13.2	3	0.69	1	1.28	0.486	0.695	(B) BRAF Class 3
PGBD3	10q11.23	11	0.33	3	0.40	0.486	0.695	(B) BRAF Class 3
NEIL3	4q34.3	23	3.94	5	3.38	0.487	0.695	(A) BRAF Class 1 v12
CSMD3	8q23.3	3	2.56	1	4.76	0.487	0.695	(B) BRAF Class 3
FN1	2q35	3	2.56	1	4.76	0.487	0.695	(B) BRAF Class 3
FOXP4	6p21.1	3	2.56	1	4.76	0.487	0.695	(B) BRAF Class 3
ITGA10	1q21.1	3	2.56	1	4.76	0.487	0.695	(B) BRAF Class 3
IDH2	15q26.1	48	1.51	10	1.39	0.488	0.695	(A) BRAF Class 1 v12
NIN	14q22.1	3	2.46	1	4.55	0.489	0.695	(B) BRAF Class 3
TOPBP1	3q22.1	23	3.88	5	3.33	0.489	0.695	(A) BRAF Class 1 v12
VTCN1	1p13.1-p12	13	1.10	2	0.79	0.489	0.695	(A) BRAF Class 1 v12
RIF1	2q23.3	41	7.02	11	7.43	0.49	0.695	(B) BRAF Class 3
SERPINA1	14q32.13	15	2.57	3	2.03	0.49	0.695	(A) BRAF Class 1 v12
RHEB	7q36.1	11	0.52	3	0.62	0.493	0.696	(B) BRAF Class 3
JAZF1	7p15.2-p15.1	6	0.76	2	1.03	0.493	0.696	(B) BRAF Class 3
MEN1	11q13.1	57	2.32	14	2.41	0.493	0.696	(B) BRAF Class 3
RHOA	3p21.31	30	1.48	6	1.31	0.495	0.696	(A) BRAF Class 1 v12
TMEM127	2q11.2	11	0.61	3	0.73	0.496	0.696	(B) BRAF Class 3
DCLRE1C	10p13	7	1.20	1	0.68	0.496	0.696	(A) BRAF Class 1 v12
CTLA4	2q33.2	25	1.43	5	1.24	0.498	0.696	(A) BRAF Class 1 v12
XRCC2	7q36.1	23	1.22	6	1.34	0.499	0.696	(B) BRAF Class 3
DYNC1I1	7q21.3	2	2.33	1	4.55	0.499	0.696	(B) BRAF Class 3
RPS6KA4	11q13.1	36	3.06	7	2.77	0.5	0.696	(A) BRAF Class 1 v12
REL	2p16.1	41	1.68	9	1.55	0.501	0.696	(A) BRAF Class 1 v12
CDH20	18q21.33	2	1.00	1	1.92	0.502	0.696	(B) BRAF Class 3
EPHB6	7q34	2	1.00	1	1.92	0.502	0.696	(B) BRAF Class 3
KIF5B	10p11.22	11	2.68	1	1.56	0.502	0.696	(A) BRAF Class 1 v12
IRS1	2q36.3	63	5.35	14	5.53	0.502	0.696	(B) BRAF Class 3
NUP93	16q13	30	2.06	6	1.84	0.502	0.696	(A) BRAF Class 1 v12
POLH	6p21.1	11	1.70	2	1.24	0.503	0.696	(A) BRAF Class 1 v12
CHD4	12p13.31	38	6.04	8	6.40	0.504	0.696	(B) BRAF Class 3
RBL2	16q12.2	8	2.26	2	2.90	0.505	0.696	(B) BRAF Class 3
SRP19	5q22.2	3	0.81	0	0.00	0.505	0.696	(A) BRAF Class 1 v12
FLT4	5q35.3	171	7.04	39	6.93	0.506	0.696	(A) BRAF Class 1 v12
BABAM1	19p13.11	14	1.29	4	1.45	0.507	0.696	(B) BRAF Class 3
HSD3B1	1p12	13	2.48	2	1.83	0.508	0.696	(A) BRAF Class 1 v12
NCOR2	12q24.31	3	2.61	1	4.55	0.508	0.696	(B) BRAF Class 3
CSNK1A1	5q32	5	1.50	0	0.00	0.508	0.696	(A) BRAF Class 1 v12
FGF9	13q12.11	5	1.50	0	0.00	0.508	0.696	(A) BRAF Class 1 v12
TLX3	5q35.1	14	2.38	4	2.68	0.508	0.696	(B) BRAF Class 3
BBC3	19q13.32	8	0.68	1	0.40	0.509	0.696	(A) BRAF Class 1 v12
GREM1	15q13.3	11	0.56	3	0.66	0.51	0.696	(B) BRAF Class 3
FGF19	11q13.3	25	1.53	5	1.34	0.51	0.696	(A) BRAF Class 1 v12
CDK5	7q36.1	3	0.85	1	1.45	0.511	0.696	(B) BRAF Class 3
CHD2	15q26.1	38	6.03	8	6.35	0.511	0.696	(B) BRAF Class 3
TEK	9p21.2	33	4.65	8	4.30	0.512	0.697	(A) BRAF Class 1 v12
IGF2	11p15.5	24	1.15	5	1.01	0.513	0.697	(A) BRAF Class 1 v12
ERCC6	10q11.23	34	5.82	8	5.41	0.515	0.699	(A) BRAF Class 1 v12
HNRNPK	9q21.32	4	0.93	1	1.49	0.517	0.699	(B) BRAF Class 3
ETV5	3q27.2	24	1.64	5	1.46	0.517	0.699	(A) BRAF Class 1 v12
PRPF8	17p13.3	14	3.23	2	2.44	0.519	0.702	(A) BRAF Class 1 v12
KMT5A	12q24.31	3	0.55	0	0.00	0.522	0.704	(A) BRAF Class 1 v12
KAT6B	10q22.2	43	6.29	11	6.47	0.523	0.704	(B) BRAF Class 3
PRKD1	14q12	11	1.87	3	2.14	0.523	0.704	(B) BRAF Class 3
GRM3	7q21.11-q21.12	58	8.80	12	8.45	0.524	0.704	(A) BRAF Class 1 v12
ERRFI1	1p36.23	25	1.74	6	1.83	0.528	0.708	(B) BRAF Class 3
ZNF703	8p11.23	21	2.96	5	3.16	0.528	0.708	(B) BRAF Class 3
GNAS	20q13.32	104	3.17	23	3.18	0.531	0.711	(B) BRAF Class 3
TRIM37	17q22	18	3.08	4	2.70	0.532	0.712	(A) BRAF Class 1 v12
ARAF	Xp11.3	64	2.47	15	2.49	0.533	0.713	(B) BRAF Class 3
INPPL1	11q13.4	31	5.89	7	5.51	0.534	0.713	(A) BRAF Class 1 v12
MT-ND5	-	12	0.36	3	0.40	0.535	0.713	(B) BRAF Class 3
HDAC4	2q37.3	3	1.34	1	2.13	0.535	0.713	(B) BRAF Class 3
SBDS	7q11.21	7	0.68	2	0.83	0.536	0.714	(B) BRAF Class 3
SIN3A	15q24.2	3	1.91	1	3.03	0.537	0.714	(B) BRAF Class 3
HIST3H3	1q42.13	8	0.72	2	0.86	0.54	0.716	(B) BRAF Class 3
CCN6	6q21	17	2.50	3	2.13	0.54	0.716	(A) BRAF Class 1 v12
TCF7L1	2p11.2	8	1.78	1	1.11	0.541	0.716	(A) BRAF Class 1 v12
VHL	3p25.3	26	0.83	6	0.86	0.542	0.716	(B) BRAF Class 3
PLK2	5q11.2	27	2.29	6	2.37	0.542	0.716	(B) BRAF Class 3
TYRO3	15q15.1	2	1.48	0	0.00	0.543	0.717	(A) BRAF Class 1 v12
CYLD	16q12.1	49	2.36	11	2.29	0.544	0.717	(A) BRAF Class 1 v12
ZBTB7A	19p13.3	12	3.60	2	4.17	0.546	0.718	(B) BRAF Class 3
SMARCD1	12q13.12	24	1.87	5	1.72	0.546	0.718	(A) BRAF Class 1 v12
RPA1	17p13.3	10	1.46	3	1.61	0.548	0.719	(B) BRAF Class 3
SAMD9	7q21.2	4	2.13	1	3.13	0.548	0.719	(B) BRAF Class 3
DMC1	22q13.1	10	1.71	2	1.35	0.55	0.72	(A) BRAF Class 1 v12
BCL2L11	2q13	8	0.68	2	0.79	0.551	0.72	(B) BRAF Class 3
NPRL2	3p21.31	3	1.14	1	1.72	0.551	0.72	(B) BRAF Class 3
BLM	15q26.1	108	4.44	25	4.44	0.552	0.72	(A) BRAF Class 1 v12
SMC1A	Xp11.22	9	1.00	2	1.15	0.553	0.72	(B) BRAF Class 3
MDM2	12q15	43	1.69	10	1.70	0.553	0.721	(B) BRAF Class 3
FANCC	9q22.32	38	1.54	9	1.55	0.555	0.721	(B) BRAF Class 3
ARFRP1	20q13.33	7	0.99	1	0.64	0.556	0.722	(A) BRAF Class 1 v12
PIK3R3	1p34.1	13	1.10	3	1.19	0.558	0.724	(B) BRAF Class 3
FLCN	17p11.2	60	2.46	14	2.44	0.561	0.727	(A) BRAF Class 1 v12
MAP3K2	2q14.3	3	1.91	0	0.00	0.562	0.727	(A) BRAF Class 1 v12
DCUN1D1	3q26.33	7	0.59	1	0.39	0.562	0.727	(A) BRAF Class 1 v12
PGR	11q22.1	67	6.04	14	6.01	0.564	0.728	(A) BRAF Class 1 v12
XRCC5	2q35	11	1.82	3	1.95	0.564	0.728	(B) BRAF Class 3
SF1	11q13.1	13	3.00	2	2.44	0.565	0.728	(A) BRAF Class 1 v12
CADM2	3p12.1	8	3.04	2	3.45	0.566	0.729	(B) BRAF Class 3
ELANE	19p13.3	14	2.14	3	1.89	0.568	0.73	(A) BRAF Class 1 v12
PDK1	2q31.1	8	1.13	2	1.27	0.569	0.731	(B) BRAF Class 3
HFE	6p22.2	6	1.03	1	0.68	0.57	0.732	(A) BRAF Class 1 v12
HMBS	11q23.3	7	1.20	2	1.35	0.572	0.732	(B) BRAF Class 3
NKX3-1	8p21.2	17	0.98	4	1.00	0.574	0.734	(B) BRAF Class 3
RAD54B	8q22.1	17	2.91	4	2.70	0.576	0.736	(A) BRAF Class 1 v12
BMPR1A	10q23.2	48	2.06	11	2.06	0.578	0.738	(A) BRAF Class 1 v12
GALNT12	9q22.33	13	1.76	3	1.58	0.579	0.738	(A) BRAF Class 1 v12
MAX	14q23.3	15	0.79	3	0.71	0.579	0.738	(A) BRAF Class 1 v12
CD58	1p13.1	3	0.70	0	0.00	0.581	0.739	(A) BRAF Class 1 v12
FGF1	5q31.3	4	1.20	0	0.00	0.582	0.739	(A) BRAF Class 1 v12
STK19	6p21.33	12	2.28	3	2.36	0.583	0.739	(B) BRAF Class 3
TAP1	6p21.32	12	2.28	3	2.36	0.583	0.739	(B) BRAF Class 3
CDK9	9q34.11	3	0.85	0	0.00	0.585	0.741	(A) BRAF Class 1 v12
PSMD13	11p15.5	3	0.85	0	0.00	0.585	0.741	(A) BRAF Class 1 v12
MYBL1	8q13.1	30	2.69	7	2.66	0.588	0.742	(A) BRAF Class 1 v12
EXT2	11p11.2	18	1.76	4	1.66	0.589	0.742	(A) BRAF Class 1 v12
ENG	9q34.11	13	2.23	3	2.03	0.589	0.742	(A) BRAF Class 1 v12
NFKBIA	14q13.2	26	1.09	6	1.07	0.59	0.742	(A) BRAF Class 1 v12
MAFB	20q12	3	0.44	1	0.58	0.591	0.742	(B) BRAF Class 3
GSTM5	1p13.3	4	1.13	1	1.45	0.591	0.742	(B) BRAF Class 3
RAC2	22q13.1	6	1.14	1	0.79	0.592	0.742	(A) BRAF Class 1 v12
SESN1	6q21	6	1.14	1	0.79	0.592	0.742	(A) BRAF Class 1 v12
SDHB	1p36.13	10	0.41	2	0.35	0.593	0.742	(A) BRAF Class 1 v12
PRPF40B	12q13.12	10	2.30	2	2.44	0.593	0.742	(B) BRAF Class 3
CD74	5q33.1	3	0.65	0	0.00	0.594	0.742	(A) BRAF Class 1 v12
FAAP20	1p36.33	3	0.51	1	0.68	0.596	0.743	(B) BRAF Class 3
PTPRK	6q22.33	19	12.10	4	12.12	0.596	0.743	(B) BRAF Class 3
TRAF3	14q32.32	13	1.60	3	1.48	0.598	0.744	(A) BRAF Class 1 v12
ZBTB2	6q25.1	3	0.61	0	0.00	0.599	0.744	(A) BRAF Class 1 v12
RAB35	12q24.23	11	0.99	2	0.86	0.601	0.746	(A) BRAF Class 1 v12
EIF4A2	3q27.3	11	0.99	2	0.85	0.601	0.746	(A) BRAF Class 1 v12
EGFL7	9q34.3	15	1.27	3	1.19	0.603	0.747	(A) BRAF Class 1 v12
FAS	10q23.31	18	1.23	4	1.18	0.604	0.748	(A) BRAF Class 1 v12
IL10	1q32.1	9	0.76	2	0.79	0.605	0.749	(B) BRAF Class 3
RPS6KA2	6q27	3	2.56	0	0.00	0.607	0.749	(A) BRAF Class 1 v12
TNK2	3q29	3	2.56	0	0.00	0.607	0.749	(A) BRAF Class 1 v12
CD79A	19q13.2	22	1.46	5	1.45	0.609	0.75	(A) BRAF Class 1 v12
PPP4R2	3p13	8	1.52	2	1.57	0.609	0.75	(B) BRAF Class 3
HIST1H3F	6p22.2	4	0.36	1	0.43	0.615	0.756	(B) BRAF Class 3
HIST1H3H	6p22.1	4	0.36	1	0.43	0.615	0.756	(B) BRAF Class 3
DDX41	5q35.3	5	1.07	1	1.23	0.618	0.758	(B) BRAF Class 3
CLDN18	3q22.3	4	2.55	1	3.03	0.619	0.758	(B) BRAF Class 3
ZBTB20	3q13.31	4	2.55	1	3.03	0.619	0.758	(B) BRAF Class 3
RPL22	1p36.31	3	5.66	0	0.00	0.619	0.758	(A) BRAF Class 1 v12
CD22	19q13.12	2	1.72	0	0.00	0.622	0.759	(A) BRAF Class 1 v12
CACNA1E	1q25.3	3	6.25	0	0.00	0.624	0.761	(A) BRAF Class 1 v12
UMODL1	21q22.3	3	6.25	0	0.00	0.624	0.761	(A) BRAF Class 1 v12
ABRAXAS1	4q21.23	17	0.89	4	0.88	0.625	0.761	(A) BRAF Class 1 v12
ABL2	1q25.2	20	3.00	4	2.99	0.626	0.761	(A) BRAF Class 1 v12
USP7	16p13.2	2	2.33	0	0.00	0.633	0.769	(A) BRAF Class 1 v12
SQSTM1	5q35.3	4	1.52	1	1.72	0.633	0.769	(B) BRAF Class 3
FAAP24	19q13.11	2	0.34	0	0.00	0.636	0.771	(A) BRAF Class 1 v12
TAZ	Xq28	2	0.34	0	0.00	0.636	0.771	(A) BRAF Class 1 v12
DDR1	6p21.33	3	1.46	1	1.69	0.637	0.771	(B) BRAF Class 3
PAK1	11q13.5-q14.1	14	1.07	3	1.05	0.638	0.771	(A) BRAF Class 1 v12
PNKP	19q13.33	12	2.05	3	2.03	0.64	0.773	(A) BRAF Class 1 v12
PMAIP1	18q21.32	6	0.51	1	0.40	0.641	0.773	(A) BRAF Class 1 v12
NUP214	9q34.13	5	3.82	1	4.17	0.642	0.773	(B) BRAF Class 3
HIST2H3D	1q21.2	6	0.55	1	0.43	0.647	0.778	(A) BRAF Class 1 v12
RNF213	17q25.3	7	5.74	1	4.55	0.648	0.778	(A) BRAF Class 1 v12
PDPK1	16p13.3	6	0.48	1	0.38	0.649	0.778	(A) BRAF Class 1 v12
THADA	2p21	3	1.92	0	0.00	0.649	0.778	(A) BRAF Class 1 v12
CHD1	5q15-q21.1	6	3.82	1	3.03	0.65	0.778	(A) BRAF Class 1 v12
HIST1H3J	6p22.1	10	0.90	2	0.86	0.653	0.781	(A) BRAF Class 1 v12
FGF2	4q28.1	3	0.90	0	0.00	0.667	0.797	(A) BRAF Class 1 v12
EPB41L4A	5q22.1-q22.2	2	0.06	0	0.00	0.668	0.797	(A) BRAF Class 1 v12
H19	11p15.5	2	0.06	0	0.00	0.668	0.797	(A) BRAF Class 1 v12
MAP3K7	6q15	2	0.79	0	0.00	0.674	0.803	(A) BRAF Class 1 v12
FGF10	5p12	9	1.27	2	1.27	0.677	0.805	(A) BRAF Class 1 v12
DUSP2	2q11.2	2	0.90	0	0.00	0.679	0.808	(A) BRAF Class 1 v12
CNOT3	19q13.42	2	1.17	0	0.00	0.682	0.809	(A) BRAF Class 1 v12
AJUBA	14q11.2	2	1.27	0	0.00	0.682	0.809	(A) BRAF Class 1 v12
HIST1H3A	6p22.2	2	0.18	0	0.00	0.683	0.809	(A) BRAF Class 1 v12
RPL26	17p13.1	2	0.56	0	0.00	0.7	0.829	(A) BRAF Class 1 v12
ASPSCR1	17q25.3	2	1.72	0	0.00	0.706	0.835	(A) BRAF Class 1 v12
OGA	10q24.32	3	3.23	0	0.00	0.713	0.841	(A) BRAF Class 1 v12
ZFPM1	16q24.2	3	3.23	0	0.00	0.713	0.841	(A) BRAF Class 1 v12
DPYD	1p21.3	4	1.62	1	1.52	0.715	0.841	(A) BRAF Class 1 v12
KNL1	15q15.1	2	1.64	0	0.00	0.717	0.841	(A) BRAF Class 1 v12
GUCY1A2	11q22.3	2	1.71	0	0.00	0.718	0.841	(A) BRAF Class 1 v12
MTR	1q43	2	1.71	0	0.00	0.718	0.841	(A) BRAF Class 1 v12
NLRP1	17p13.2	2	1.71	0	0.00	0.718	0.841	(A) BRAF Class 1 v12
STK36	2q35	2	1.71	0	0.00	0.718	0.841	(A) BRAF Class 1 v12
TRIM24	7q33-q34	2	1.71	0	0.00	0.718	0.841	(A) BRAF Class 1 v12
EIF4E	4q23	5	0.45	1	0.43	0.72	0.841	(A) BRAF Class 1 v12
HIST2H3C	1q21.2	5	0.45	1	0.43	0.72	0.841	(A) BRAF Class 1 v12
MAF	16q23.2	4	0.56	1	0.53	0.721	0.841	(A) BRAF Class 1 v12
TFRC	3q29	7	2.07	1	2.04	0.732	0.854	(A) BRAF Class 1 v12
PCDHAC2	5q31.3	2	4.17	0	0.00	0.732	0.854	(A) BRAF Class 1 v12
TAL2	9q31.2	4	0.68	1	0.67	0.734	0.854	(A) BRAF Class 1 v12
CAMTA1	1p36.31-p36.23	2	1.24	0	0.00	0.749	0.867	(A) BRAF Class 1 v12
PHLPP2	16q22.2	1	0.76	0	0.00	0.771	0.867	(A) BRAF Class 1 v12
TPMT	6p22.3	1	0.66	0	0.00	0.772	0.867	(A) BRAF Class 1 v12
HLA-C	6p21.33	1	0.87	0	0.00	0.788	0.867	(A) BRAF Class 1 v12
PTPRO	12p12.3|12p13-p12	1	0.86	0	0.00	0.789	0.867	(A) BRAF Class 1 v12
UGT1A1	2q37.1	1	0.40	0	0.00	0.789	0.867	(A) BRAF Class 1 v12
CDH5	16q21	1	0.50	0	0.00	0.794	0.867	(A) BRAF Class 1 v12
SGK1	6q23.2	1	0.66	0	0.00	0.795	0.867	(A) BRAF Class 1 v12
CDKN2B-AS1	9p21.3	1	0.26	0	0.00	0.796	0.867	(A) BRAF Class 1 v12
APOBEC3G	22q13.1	1	1.16	0	0.00	0.796	0.867	(A) BRAF Class 1 v12
DUSP6	12q21.33	1	1.16	0	0.00	0.796	0.867	(A) BRAF Class 1 v12
HSPA5	9q33.3	1	1.16	0	0.00	0.796	0.867	(A) BRAF Class 1 v12
SLX1B	16p11.2	1	0.17	0	0.00	0.798	0.867	(A) BRAF Class 1 v12
RPL10	Xq28	1	1.05	0	0.00	0.798	0.867	(A) BRAF Class 1 v12
ABCB4	7q21.12	2	2.15	0	0.00	0.799	0.867	(A) BRAF Class 1 v12
MAML3	4q31.1	2	2.15	0	0.00	0.799	0.867	(A) BRAF Class 1 v12
PTP4A1	6q12	1	0.19	0	0.00	0.806	0.867	(A) BRAF Class 1 v12
ABCA17P	16p13.3	1	0.03	0	0.00	0.817	0.867	(A) BRAF Class 1 v12
ABR	17p13.3	1	0.03	0	0.00	0.817	0.867	(A) BRAF Class 1 v12
ANKLE2	12q24.33	1	0.03	0	0.00	0.817	0.867	(A) BRAF Class 1 v12
ANKRD30A	10p11.21	1	0.03	0	0.00	0.817	0.867	(A) BRAF Class 1 v12
AP1G1	16q22.2	1	0.03	0	0.00	0.817	0.867	(A) BRAF Class 1 v12
APBA1	9q21.12	1	0.03	0	0.00	0.817	0.867	(A) BRAF Class 1 v12
ARHGAP4	Xq28	1	0.03	0	0.00	0.817	0.867	(A) BRAF Class 1 v12
ARSB	5q14.1	1	0.03	0	0.00	0.817	0.867	(A) BRAF Class 1 v12
C2ORF83	2q36.3	1	0.03	0	0.00	0.817	0.867	(A) BRAF Class 1 v12
CASZ1	1p36.22	1	0.03	0	0.00	0.817	0.867	(A) BRAF Class 1 v12
CLIP1	12q24.31	1	0.03	0	0.00	0.817	0.867	(A) BRAF Class 1 v12
CPSF1	8q24.3	1	0.03	0	0.00	0.817	0.867	(A) BRAF Class 1 v12
CTDSP1	2q35	1	0.03	0	0.00	0.817	0.867	(A) BRAF Class 1 v12
CTRC	1p36.21	1	0.03	0	0.00	0.817	0.867	(A) BRAF Class 1 v12
CTSB	8p23.1	1	0.03	0	0.00	0.817	0.867	(A) BRAF Class 1 v12
CUL1	7q36.1	1	0.03	0	0.00	0.817	0.867	(A) BRAF Class 1 v12
DCBLD1	6q22.1	1	0.03	0	0.00	0.817	0.867	(A) BRAF Class 1 v12
DDAH1	1p22.3	1	0.03	0	0.00	0.817	0.867	(A) BRAF Class 1 v12
DEF8	16q24.3	1	0.03	0	0.00	0.817	0.867	(A) BRAF Class 1 v12
DENND4C	9p22.1	1	0.03	0	0.00	0.817	0.867	(A) BRAF Class 1 v12
DHRSX	Xp22.33 and Yp11.2	1	0.03	0	0.00	0.817	0.867	(A) BRAF Class 1 v12
DRICH1	22q11.23	1	0.03	0	0.00	0.817	0.867	(A) BRAF Class 1 v12
EIF3E	8q23.1	1	0.03	0	0.00	0.817	0.867	(A) BRAF Class 1 v12
ELAC2	17p12	1	0.03	0	0.00	0.817	0.867	(A) BRAF Class 1 v12
EMID1	22q12.2	1	0.03	0	0.00	0.817	0.867	(A) BRAF Class 1 v12
F11-AS1	4q35.2	1	0.03	0	0.00	0.817	0.867	(A) BRAF Class 1 v12
FKBP9P1	7p11.2	1	0.03	0	0.00	0.817	0.867	(A) BRAF Class 1 v12
GALNT11	7q36.1|7q36.1	1	0.03	0	0.00	0.817	0.867	(A) BRAF Class 1 v12
GOLT1A	1q32.1	1	0.03	0	0.00	0.817	0.867	(A) BRAF Class 1 v12
GRAPL	17p11.2	1	0.03	0	0.00	0.817	0.867	(A) BRAF Class 1 v12
GRIA1	5q33.2	1	0.03	0	0.00	0.817	0.867	(A) BRAF Class 1 v12
GRIK1	21q21.3	1	0.03	0	0.00	0.817	0.867	(A) BRAF Class 1 v12
HECTD4	12q24.13	1	0.03	0	0.00	0.817	0.867	(A) BRAF Class 1 v12
HLA-DOB	6p21.32	1	0.03	0	0.00	0.817	0.867	(A) BRAF Class 1 v12
HOOK2	19p13.13	1	0.03	0	0.00	0.817	0.867	(A) BRAF Class 1 v12
HSD17B6	12q13.3	1	0.03	0	0.00	0.817	0.867	(A) BRAF Class 1 v12
IGHE	14q32.33	1	0.03	0	0.00	0.817	0.867	(A) BRAF Class 1 v12
LDLR	19p13.2	1	0.03	0	0.00	0.817	0.867	(A) BRAF Class 1 v12
LOC105374464	2p22.2	1	0.03	0	0.00	0.817	0.867	(A) BRAF Class 1 v12
LTBP4	19q13.2	1	0.03	0	0.00	0.817	0.867	(A) BRAF Class 1 v12
MYEOV	11q13.3	1	0.03	0	0.00	0.817	0.867	(A) BRAF Class 1 v12
MYO1D	17q11.2	1	0.03	0	0.00	0.817	0.867	(A) BRAF Class 1 v12
MYSM1	1p32.1	1	0.03	0	0.00	0.817	0.867	(A) BRAF Class 1 v12
NBPF20	1q21.1	1	0.03	0	0.00	0.817	0.867	(A) BRAF Class 1 v12
NDUFB2	7q34	1	0.03	0	0.00	0.817	0.867	(A) BRAF Class 1 v12
NELFA	4p16.3	1	0.03	0	0.00	0.817	0.867	(A) BRAF Class 1 v12
PADI2	1p36.13	1	0.03	0	0.00	0.817	0.867	(A) BRAF Class 1 v12
PAX9	14q13.3	1	0.03	0	0.00	0.817	0.867	(A) BRAF Class 1 v12
PFKFB4	3p21.31	1	0.03	0	0.00	0.817	0.867	(A) BRAF Class 1 v12
PKD1	16p13.3	1	0.03	0	0.00	0.817	0.867	(A) BRAF Class 1 v12
PLEKHA7	11p15.2-p15.1	1	0.03	0	0.00	0.817	0.867	(A) BRAF Class 1 v12
PLVAP	19p13.11	1	0.03	0	0.00	0.817	0.867	(A) BRAF Class 1 v12
PNPLA6	19p13.2	1	0.03	0	0.00	0.817	0.867	(A) BRAF Class 1 v12
PRMT6	1p13.3	1	0.03	0	0.00	0.817	0.867	(A) BRAF Class 1 v12
PTBP3	9q32	1	0.03	0	0.00	0.817	0.867	(A) BRAF Class 1 v12
RAB2A	8q12.1-q12.2	1	0.03	0	0.00	0.817	0.867	(A) BRAF Class 1 v12
SAE1	19q13.32	1	0.03	0	0.00	0.817	0.867	(A) BRAF Class 1 v12
SCAP	3p21.31	1	0.03	0	0.00	0.817	0.867	(A) BRAF Class 1 v12
SCARA5	8p21.1	1	0.03	0	0.00	0.817	0.867	(A) BRAF Class 1 v12
SDCCAG8	1q43-q44	1	0.03	0	0.00	0.817	0.867	(A) BRAF Class 1 v12
SEMA6D	15q21.1	1	0.03	0	0.00	0.817	0.867	(A) BRAF Class 1 v12
SIK3	11q23.3	1	0.03	0	0.00	0.817	0.867	(A) BRAF Class 1 v12
SLC30A5	5q13.1-q13.2	1	0.03	0	0.00	0.817	0.867	(A) BRAF Class 1 v12
SND1	7q32.1	1	0.03	0	0.00	0.817	0.867	(A) BRAF Class 1 v12
SPG11	15q21.1	1	0.03	0	0.00	0.817	0.867	(A) BRAF Class 1 v12
TCAF2P1	7q35	1	0.03	0	0.00	0.817	0.867	(A) BRAF Class 1 v12
TRAJ32	14q11.2	1	0.03	0	0.00	0.817	0.867	(A) BRAF Class 1 v12
TRAJ42	14q11.2	1	0.03	0	0.00	0.817	0.867	(A) BRAF Class 1 v12
TRAJ53	14q11.2	1	0.03	0	0.00	0.817	0.867	(A) BRAF Class 1 v12
TRBJ2-2	7q34	1	0.03	0	0.00	0.817	0.867	(A) BRAF Class 1 v12
TRGJP	7p14.1	1	0.03	0	0.00	0.817	0.867	(A) BRAF Class 1 v12
TSPOAP1	17q22	1	0.03	0	0.00	0.817	0.867	(A) BRAF Class 1 v12
UGT1A6	2q37.1	1	0.03	0	0.00	0.817	0.867	(A) BRAF Class 1 v12
ZNF423	16q12.1	1	0.03	0	0.00	0.817	0.867	(A) BRAF Class 1 v12
ZNF599	19q13.11	1	0.03	0	0.00	0.817	0.867	(A) BRAF Class 1 v12
BCL2L2	14q11.2	1	0.14	0	0.00	0.819	0.868	(A) BRAF Class 1 v12
GID4	17p11.2|17p11.2	1	0.17	0	0.00	0.822	0.871	(A) BRAF Class 1 v12
HSP90AB1	6p21.1	1	0.40	0	0.00	0.824	0.872	(A) BRAF Class 1 v12
MGMT	10q26.3	1	0.64	0	0.00	0.826	0.873	(A) BRAF Class 1 v12
MAP3K14	17q21.31	1	0.09	0	0.00	0.826	0.873	(A) BRAF Class 1 v12
IRF8	16q24.1	1	0.81	0	0.00	0.838	0.876	(A) BRAF Class 1 v12
MRTFA	22q13.1-q13.2	1	0.86	0	0.00	0.841	0.876	(A) BRAF Class 1 v12
PRDM16	1p36.32	1	0.86	0	0.00	0.841	0.876	(A) BRAF Class 1 v12
SPI1	11p11.2	1	0.90	0	0.00	0.841	0.876	(A) BRAF Class 1 v12
FOXO3	6q21	1	0.81	0	0.00	0.842	0.876	(A) BRAF Class 1 v12
ARNT	1q21.3	1	0.82	0	0.00	0.847	0.876	(A) BRAF Class 1 v12
MUC1	1q22	1	0.82	0	0.00	0.847	0.876	(A) BRAF Class 1 v12
NFKB2	10q24.32	1	0.82	0	0.00	0.847	0.876	(A) BRAF Class 1 v12
PER1	17p13.1	1	0.82	0	0.00	0.847	0.876	(A) BRAF Class 1 v12
PSIP1	9p22.3	1	0.82	0	0.00	0.847	0.876	(A) BRAF Class 1 v12
TLX1	10q24.31	1	0.82	0	0.00	0.847	0.876	(A) BRAF Class 1 v12
TPR	1q31.1	1	0.82	0	0.00	0.847	0.876	(A) BRAF Class 1 v12
ZNF384	12p13.31	1	0.82	0	0.00	0.847	0.876	(A) BRAF Class 1 v12
AURKC	19q13.43	1	0.85	0	0.00	0.848	0.876	(A) BRAF Class 1 v12
BLNK	10q24.1	1	0.85	0	0.00	0.848	0.876	(A) BRAF Class 1 v12
CYP2C19	10q23.33	1	0.85	0	0.00	0.848	0.876	(A) BRAF Class 1 v12
DST	6p12.1	1	0.85	0	0.00	0.848	0.876	(A) BRAF Class 1 v12
GDNF	5p13.2	1	0.85	0	0.00	0.848	0.876	(A) BRAF Class 1 v12
IKBKB	8p11.21	1	0.85	0	0.00	0.848	0.876	(A) BRAF Class 1 v12
ITGA9	3p22.2	1	0.85	0	0.00	0.848	0.876	(A) BRAF Class 1 v12
ITGB3	17q21.32	1	0.85	0	0.00	0.848	0.876	(A) BRAF Class 1 v12
PKHD1	6p12.3-p12.2	1	0.85	0	0.00	0.848	0.876	(A) BRAF Class 1 v12
PLEKHG5	1p36.31	1	0.85	0	0.00	0.848	0.876	(A) BRAF Class 1 v12
RRM1	11p15.4	1	0.85	0	0.00	0.848	0.876	(A) BRAF Class 1 v12
LCK	1p35.2	1	0.80	0	0.00	0.85	0.877	(A) BRAF Class 1 v12
TCF12	15q21.3	1	0.50	0	0.00	0.852	0.877	(A) BRAF Class 1 v12
BIRC5	17q25.3	1	0.53	0	0.00	0.855	0.877	(A) BRAF Class 1 v12
MLF1	3q25.32	1	1.89	0	0.00	0.855	0.877	(A) BRAF Class 1 v12
ARFGAP3	22q13.2	1	2.08	0	0.00	0.857	0.877	(A) BRAF Class 1 v12
GNAI3	1p13.3	1	2.08	0	0.00	0.857	0.877	(A) BRAF Class 1 v12
SNX31	8q22.3	1	2.08	0	0.00	0.857	0.877	(A) BRAF Class 1 v12
TLR2	4q31.3	1	2.08	0	0.00	0.857	0.877	(A) BRAF Class 1 v12
TMEM216	11q12.2	1	2.08	0	0.00	0.857	0.877	(A) BRAF Class 1 v12
TBL1XR1	3q26.32	1	0.97	0	0.00	0.858	0.877	(A) BRAF Class 1 v12
PC	11q13.2	1	1.16	0	0.00	0.86	0.877	(A) BRAF Class 1 v12
PCLO	7q21.11	1	1.16	0	0.00	0.86	0.877	(A) BRAF Class 1 v12
PDCD11	10q24.33	1	1.16	0	0.00	0.86	0.877	(A) BRAF Class 1 v12
SP140	2q37.1	1	1.96	0	0.00	0.864	0.881	(A) BRAF Class 1 v12
HIP1	7q11.23	1	1.11	0	0.00	0.865	0.881	(A) BRAF Class 1 v12
ETNK1	12p12.1	1	0.63	0	0.00	0.869	0.884	(A) BRAF Class 1 v12
CD3EAP	19q13.32	1	0.30	0	0.00	0.874	0.888	(A) BRAF Class 1 v12
TSPAN31	12q14.1	1	0.30	0	0.00	0.874	0.888	(A) BRAF Class 1 v12
MLLT1	19p13.3	1	1.59	0	0.00	0.875	0.888	(A) BRAF Class 1 v12
KIF3A	5q31.1	1	2.33	0	0.00	0.878	0.89	(A) BRAF Class 1 v12
BEND2	Xp22.13	1	1.08	0	0.00	0.894	0.902	(A) BRAF Class 1 v12
FOSB	19q13.32	1	1.08	0	0.00	0.894	0.902	(A) BRAF Class 1 v12
GLMN	1p22.1	1	1.08	0	0.00	0.894	0.902	(A) BRAF Class 1 v12
OTX2	14q22.3	1	1.08	0	0.00	0.894	0.902	(A) BRAF Class 1 v12
TBXT	6q27	1	1.08	0	0.00	0.894	0.902	(A) BRAF Class 1 v12
KBTBD4	11p11.2	1	0.97	0	0.00	0.904	0.911	(A) BRAF Class 1 v12
MAGOH	1p32.3	1	0.99	0	0.00	0.918	0.925	(A) BRAF Class 1 v12
CBLC	19q13.32	1	2.78	0	0.00	0.923	0.928	(A) BRAF Class 1 v12
LRIG3	12q14.1	1	2.78	0	0.00	0.923	0.928	(A) BRAF Class 1 v12
MCM7	7q22.1	1	3.23	0	0.00	0.939	0.944	(A) BRAF Class 1 v12
TET3	2p13.1	1	2.94	0	0.00	0.944	0.948	(A) BRAF Class 1 v12
GNB1	1p36.33	1	2.27	0	0.00	0.957	0.959	(A) BRAF Class 1 v12
TOE1	1p34.1	0	0.00	1	0.13	0.959	0.961	(B) BRAF Class 3
OLIG2	21q22.11	1	3.70	0	0.00	0.964	0.965	(A) BRAF Class 1 v12
BRAF	7q34	3348	100.00	749	100.00	1	1	(B) BRAF Class 3

## Sheet: S6 All Cancer Class1+3 Filtered
Table S6: Filtered Co-Mutations across all cancer types in BRAF Class 1 and 3
Gene	Cytoband	Class 1 occurrence	Class 1 %	Class 3 occurrence	Class 3 %	SumClass	pvalue	qvalue	Enriched In
KIT	4q12	80	2.39	33	4.41	113	0.002742	0.0482	(B) BRAF Class 3
EGFR	7p11.2	134	4.00	49	6.57	183	0.002211	0.0401	(B) BRAF Class 3
MAP3K13	3q27.2	20	1.52	14	4.55	34	0.002103	0.0388	(B) BRAF Class 3
FGFR4	5q35.2	71	2.76	32	5.30	103	0.001996	0.0374	(B) BRAF Class 3
ZRSR2	Xp22.2	41	1.83	1	0.20	42	0.001821	0.0348	(A) BRAF Class 1 v12
RUNX1T1	8q21.3	57	4.56	27	9.34	84	0.001796	0.0348	(B) BRAF Class 3
MSH3	5q14.1	94	8.82	8	3.35	102	0.001712	0.0338	(A) BRAF Class 1 v12
ANKRD26	10p12.1	45	13.51	0	0.00	45	0.001551	0.0312	(A) BRAF Class 1 v12
BCOR	Xp11.4	157	6.40	19	3.26	176	0.001469	0.0301	(A) BRAF Class 1 v12
NTRK3	15q25.3	112	4.41	45	7.64	157	0.001392	0.0291	(B) BRAF Class 3
SMAD3	15q22.33	25	1.70	16	4.85	41	0.001331	0.0283	(B) BRAF Class 3
TP63	3q28	57	4.57	26	9.74	83	0.001246	0.0282	(B) BRAF Class 3
CBL	11q23.3	57	2.22	28	4.67	85	0.001277	0.0282	(B) BRAF Class 3
ASXL1	20q11.21	132	5.30	52	8.81	184	0.0013	0.0282	(B) BRAF Class 3
POT1	7q31.33	13	1.54	12	5.83	25	0.001137	0.0262	(B) BRAF Class 3
PMS1	2q32.2	55	2.38	27	5.14	82	0.00112	0.0262	(B) BRAF Class 3
DICER1	14q32.13	91	3.78	39	7.01	130	0.001033	0.0254	(B) BRAF Class 3
KDR	4q12	162	5.08	59	8.38	221	0.0007135	0.0184	(B) BRAF Class 3
KMT2D	12q13.12	362	14.73	118	20.34	480	0.0007025	0.0184	(B) BRAF Class 3
CARD11	7p22.2	157	6.38	61	10.52	218	0.0005814	0.0157	(B) BRAF Class 3
NOTCH1	9q34.3	178	5.42	64	8.80	242	0.0005804	0.0157	(B) BRAF Class 3
HLA-A	6p22.1	48	3.95	1	0.37	49	0.0005327	0.0151	(A) BRAF Class 1 v12
ARID2	12q12	180	7.41	67	11.90	247	0.0005246	0.0151	(B) BRAF Class 3
FGFR2	10q26.13	89	2.66	39	5.23	128	0.0004394	0.0135	(B) BRAF Class 3
PIK3CA	3q26.32	311	9.29	102	13.67	413	0.0003197	0.0101	(B) BRAF Class 3
RET	10q11.21	123	3.67	50	6.70	173	0.0003012	0.009808	(B) BRAF Class 3
SRC	20q11.23	22	0.83	16	2.86	38	0.0002887	0.009684	(B) BRAF Class 3
FLT1	13q12.3	132	5.37	55	9.48	187	0.0002812	0.009684	(B) BRAF Class 3
CBLB	3q13.11	16	1.51	15	5.88	31	0.0002178	0.007776	(B) BRAF Class 3
BRIP1	17q23.2	65	2.64	34	5.86	99	0.0001897	0.006998	(B) BRAF Class 3
SYNE1	6q25.2	11	2.14	11	11.34	22	0.0001488	0.005777	(B) BRAF Class 3
RAF1	3p25.2	37	1.42	24	3.95	61	0.0001491	0.005777	(B) BRAF Class 3
TERT	5p15.33	842	34.20	145	26.22	987	0.0001513	0.005777	(A) BRAF Class 1 v12
EPHA3	3p11.1	92	4.85	43	9.95	135	8.853e-05	0.003769	(B) BRAF Class 3
PDGFRA	4q12	102	3.13	46	6.33	148	8.114e-05	0.00369	(B) BRAF Class 3
PTPRT	20q12-q13.11	160	11.36	61	19.87	221	8.334e-05	0.00369	(B) BRAF Class 3
PTPRD	9p24.1-p23	184	10.62	71	17.93	255	7.474e-05	0.00369	(B) BRAF Class 3
ATM	11q22.3	260	8.16	91	12.93	351	8.162e-05	0.00369	(B) BRAF Class 3
ERBB3	12q13.2	81	3.15	41	6.82	122	6.111e-05	0.003221	(B) BRAF Class 3
ARID1A	1p36.11	269	10.59	99	16.81	368	3.239e-05	0.001793	(B) BRAF Class 3
TET2	4q24	155	6.23	68	11.53	223	1.623e-05	0.0009458	(B) BRAF Class 3
MCL1	1q21.2	25	1.02	22	3.80	47	1.216e-05	0.0007477	(B) BRAF Class 3
FLT3	13q12.2	100	3.10	49	6.87	149	7.075e-06	0.0004607	(B) BRAF Class 3
PPP2R1A	19q13.41	34	1.54	27	5.19	61	4.608e-06	0.0003188	(B) BRAF Class 3
ERBB2	17q12	88	2.63	46	6.19	134	4.205e-06	0.0003104	(B) BRAF Class 3
MET	7q31.2	121	3.65	57	7.71	178	3.884e-06	0.0003071	(B) BRAF Class 3
ERBB4	2q34	206	6.36	83	11.53	289	3.336e-06	0.000284	(B) BRAF Class 3
PTPN11	12q24.13	35	1.08	27	3.75	62	2.746e-06	0.0002533	(B) BRAF Class 3
NOTCH2	1p12	109	4.36	57	10.00	166	4.77e-07	4.801e-05	(B) BRAF Class 3
SMARCA4	19p13.2	159	6.26	76	12.90	235	1.73e-07	1.918e-05	(B) BRAF Class 3
RNF43	17q22	259	11.64	21	4.02	280	1.14e-08	1.405e-06	(A) BRAF Class 1 v12
HRAS	11p15.5	17	0.51	26	3.48	43	7.73e-10	1.07e-07	(B) BRAF Class 3
APC	5q22.2	356	11.33	160	22.63	516	3.86e-14	6.1e-12	(B) BRAF Class 3
KEAP1	19p13.2	53	2.24	63	11.07	116	1.03e-17	1.91e-15	(B) BRAF Class 3
TP53	17p13.1	892	26.64	328	44.15	1220	2.97e-20	6.58e-18	(B) BRAF Class 3
STK11	19p13.3	57	1.74	79	10.93	136	1.91e-26	5.29e-24	(B) BRAF Class 3
NF1	17q11.2	144	5.66	141	23.62	285	7.45e-35	2.75e-32	(B) BRAF Class 3
NRAS	1p13.2	34	1.02	94	12.55	128	8.13e-44	4.5e-41	(B) BRAF Class 3
KRAS	12p12.1	36	1.08	129	17.22	165	2.62e-66	2.9e-63	(B) BRAF Class 3

## Sheet: S7 Melanoma Class 1+2
Table S7: Co-Mutations across BRAF Class 1 and 2 melanomas
Gene	Cytoband	Class 1 Occurrence	Class 1 %	Class 2 occurrence	Class 2 %	pvalue	qvalue	Enriched In
NF1	17q11.2	50	6.19	36	27.07	2.05e-11	1.85e-08	(B) BRAF Class 2 Melanoma
FLT3	13q12.2	41	3.70	28	19.05	2.01e-10	9.05e-08	(B) BRAF Class 2 Melanoma
HNF1A	12q24.31	18	1.63	17	11.64	4.26e-08	1.281e-05	(B) BRAF Class 2 Melanoma
NRAS	1p13.2	10	0.85	14	8.00	1.35e-07	3.034e-05	(B) BRAF Class 2 Melanoma
CARD11	7p22.2	61	7.92	27	24.32	1.544e-06	0.0002785	(B) BRAF Class 2 Melanoma
KMT2D	12q13.12	118	15.32	38	34.23	4.799e-06	0.0007215	(B) BRAF Class 2 Melanoma
KMT2A	11q23.3	67	8.61	27	23.89	7.784e-06	0.001003	(B) BRAF Class 2 Melanoma
ATR	3q23	27	3.58	16	15.24	1.293e-05	0.001458	(B) BRAF Class 2 Melanoma
MPL	1p34.2	19	1.77	13	9.03	2.468e-05	0.002474	(B) BRAF Class 2 Melanoma
EPHA7	6q16.1	57	10.27	23	28.40	2.957e-05	0.002668	(B) BRAF Class 2 Melanoma
ARHGEF12	11q23.3	5	2.48	7	26.92	6.072e-05	0.004979	(B) BRAF Class 2 Melanoma
CDKN1C	11p15.4	1	0.37	5	13.16	0.0001186	0.008918	(B) BRAF Class 2 Melanoma
RPTOR	17q25.3	34	4.73	16	15.69	0.0001383	0.009598	(B) BRAF Class 2 Melanoma
BLM	15q26.1	23	3.03	13	11.82	0.0001985	0.0128	(B) BRAF Class 2 Melanoma
MAGI2	7q21.11	18	7.89	8	40.00	0.000268	0.0158	(B) BRAF Class 2 Melanoma
MET	7q31.2	68	5.80	24	13.87	0.0002833	0.0158	(B) BRAF Class 2 Melanoma
RNF213	17q25.3	5	11.11	0	0.00	0.0002978	0.0158	(A) BRAF Class 1 Melanoma
GRIN2A	16p13.2	92	17.49	27	36.00	0.0003277	0.0164	(B) BRAF Class 2 Melanoma
FOXP1	3p13	9	1.74	8	10.81	0.0004007	0.0185	(B) BRAF Class 2 Melanoma
FLT1	13q12.3	69	8.96	23	20.72	0.0004148	0.0185	(B) BRAF Class 2 Melanoma
COL7A1	3p21.31	46	23.00	15	57.69	0.0004313	0.0185	(B) BRAF Class 2 Melanoma
ERBB4	2q34	107	9.54	32	18.93	0.0004513	0.0185	(B) BRAF Class 2 Melanoma
SF3B1	2q33.1	22	2.65	12	9.92	0.0005002	0.0196	(B) BRAF Class 2 Melanoma
SLIT2	4p15.31	28	10.61	10	38.46	0.0005359	0.0201	(B) BRAF Class 2 Melanoma
KDR	4q12	87	7.87	25	17.01	0.0006097	0.022	(B) BRAF Class 2 Melanoma
XPO1	2p15	7	0.87	7	6.09	0.0006484	0.0225	(B) BRAF Class 2 Melanoma
SOX9	17q24.3	7	0.93	7	6.42	0.000682	0.0228	(B) BRAF Class 2 Melanoma
COL2A1	12q13.11	3	5.56	4	66.67	0.0009857	0.03	(B) BRAF Class 2 Melanoma
RPS6KB2	11q13.2	3	0.74	5	8.77	0.0009932	0.03	(B) BRAF Class 2 Melanoma
JAK1	1p31.3	18	2.37	11	8.87	0.001013	0.03	(B) BRAF Class 2 Melanoma
GATA6	18q11.2	4	0.85	5	8.93	0.001032	0.03	(B) BRAF Class 2 Melanoma
ATM	11q22.3	66	5.97	20	13.61	0.001325	0.036	(B) BRAF Class 2 Melanoma
GRM8	7q31.33	4	9.30	0	0.00	0.001348	0.036	(A) BRAF Class 1 Melanoma
TET2	4q24	70	9.00	22	19.30	0.001382	0.036	(B) BRAF Class 2 Melanoma
PPARG	3p25.2	17	2.64	9	10.71	0.001442	0.036	(B) BRAF Class 2 Melanoma
POT1	7q31.33	2	0.74	4	12.12	0.001498	0.036	(B) BRAF Class 2 Melanoma
NOTCH4	6p21.32	32	6.54	13	18.84	0.001519	0.036	(B) BRAF Class 2 Melanoma
TP53	17p13.1	175	14.83	39	24.84	0.001535	0.036	(B) BRAF Class 2 Melanoma
PAK5	20p12.2	62	13.45	20	28.99	0.001558	0.036	(B) BRAF Class 2 Melanoma
RSPO2	8q23.1	4	1.28	5	11.90	0.001645	0.0371	(B) BRAF Class 2 Melanoma
CSF3R	1p34.3	13	1.85	8	8.33	0.001772	0.039	(B) BRAF Class 2 Melanoma
SYK	9q22.2	16	2.72	9	10.59	0.001995	0.0423	(B) BRAF Class 2 Melanoma
KRAS	12p12.1	6	0.51	6	3.43	0.002018	0.0423	(B) BRAF Class 2 Melanoma
HIST1H3B	6p22.2	7	1.01	6	6.19	0.002433	0.0498	(B) BRAF Class 2 Melanoma
H3F3B	17q25.1	2	0.32	4	4.60	0.002529	0.0498	(B) BRAF Class 2 Melanoma
CBLB	3q13.11	8	2.78	6	15.79	0.002539	0.0498	(B) BRAF Class 2 Melanoma
FLT4	5q35.3	61	8.04	19	17.27	0.002944	0.0565	(B) BRAF Class 2 Melanoma
TAP2	6p21.32	0	0.00	3	10.00	0.003045	0.0566	(B) BRAF Class 2 Melanoma
FGFR2	10q26.13	45	3.81	16	9.14	0.003105	0.0566	(B) BRAF Class 2 Melanoma
NOTCH2	1p12	44	5.56	15	13.51	0.003204	0.0566	(B) BRAF Class 2 Melanoma
TCF12	15q21.3	1	1.39	2	66.67	0.003214	0.0566	(B) BRAF Class 2 Melanoma
SLX4	16p13.3	29	5.48	11	15.94	0.003263	0.0566	(B) BRAF Class 2 Melanoma
NTRK1	1q23.1	43	5.24	15	12.71	0.003356	0.0571	(B) BRAF Class 2 Melanoma
FGFR1	8p11.23	17	1.44	9	5.14	0.003567	0.0594	(B) BRAF Class 2 Melanoma
APC	5q22.2	73	6.80	22	13.58	0.00362	0.0594	(B) BRAF Class 2 Melanoma
CUX1	7q22.1	34	7.66	11	21.15	0.003723	0.06	(B) BRAF Class 2 Melanoma
RUNX1T1	8q21.3	34	7.38	11	20.37	0.003797	0.0601	(B) BRAF Class 2 Melanoma
NOTCH1	9q34.3	48	4.12	15	9.80	0.003974	0.0618	(B) BRAF Class 2 Melanoma
TEK	9p21.2	19	7.51	10	22.73	0.00433	0.0662	(B) BRAF Class 2 Melanoma
FANCI	15q26.1	11	2.46	6	11.76	0.00442	0.0664	(B) BRAF Class 2 Melanoma
NR4A3	9q31.1	1	1.69	2	66.67	0.004707	0.0696	(B) BRAF Class 2 Melanoma
HRAS	11p15.5	5	0.42	5	2.87	0.00487	0.0702	(B) BRAF Class 2 Melanoma
PDGFRB	5q32	32	3.98	12	10.53	0.004903	0.0702	(B) BRAF Class 2 Melanoma
RICTOR	5p13.1	24	3.18	10	9.52	0.005043	0.0711	(B) BRAF Class 2 Melanoma
RET	10q11.21	44	3.73	15	8.57	0.005768	0.0792	(B) BRAF Class 2 Melanoma
TCF7L2	10q25.2-q25.3	9	1.31	6	6.25	0.005797	0.0792	(B) BRAF Class 2 Melanoma
INPP4B	4q31.21	9	1.70	6	8.00	0.005975	0.0804	(B) BRAF Class 2 Melanoma
ARID2	12q12	66	8.70	19	17.27	0.006166	0.0818	(B) BRAF Class 2 Melanoma
TYK2	19p13.2	3	3.85	3	42.86	0.006332	0.0823	(B) BRAF Class 2 Melanoma
EIF4A2	3q27.3	1	0.25	3	5.45	0.00639	0.0823	(B) BRAF Class 2 Melanoma
KMT2B	19q13.12	40	10.96	12	26.09	0.006536	0.083	(B) BRAF Class 2 Melanoma
FAT1	4q35.2	90	12.97	23	23.23	0.006963	0.0872	(B) BRAF Class 2 Melanoma
DNMT1	19p13.2	14	3.14	7	11.67	0.007094	0.0872	(B) BRAF Class 2 Melanoma
EP400	12q24.33	3	6.98	0	0.00	0.007247	0.0872	(A) BRAF Class 1 Melanoma
RPS6KA2	6q27	3	6.98	0	0.00	0.007247	0.0872	(A) BRAF Class 1 Melanoma
NOTCH3	19p13.12	86	11.54	22	20.95	0.007573	0.0899	(B) BRAF Class 2 Melanoma
SOX10	22q13.1	6	2.16	4	14.29	0.008095	0.0948	(B) BRAF Class 2 Melanoma
ZFHX3	16q22.2-q22.3	36	8.41	12	19.67	0.009125	0.104	(B) BRAF Class 2 Melanoma
CREBBP	16p13.3	40	4.97	13	11.40	0.009138	0.104	(B) BRAF Class 2 Melanoma
DIS3	13q21.33	13	1.74	7	6.31	0.009223	0.104	(B) BRAF Class 2 Melanoma
LIFR	5p13.1	2	3.39	2	66.67	0.009307	0.104	(B) BRAF Class 2 Melanoma
RARA	17q21.2	10	1.30	6	5.41	0.009671	0.105	(B) BRAF Class 2 Melanoma
CIITA	16p13.13	16	5.84	7	19.44	0.009764	0.105	(B) BRAF Class 2 Melanoma
BEND2	Xp22.13	1	2.50	2	66.67	0.009805	0.105	(B) BRAF Class 2 Melanoma
KDM5A	12p13.33	22	3.08	9	8.82	0.009881	0.105	(B) BRAF Class 2 Melanoma
ARID1A	1p36.11	61	7.58	17	14.91	0.0104	0.109	(B) BRAF Class 2 Melanoma
FANCA	16q24.3	27	3.35	10	8.77	0.0109	0.112	(B) BRAF Class 2 Melanoma
PREX2	8q13.2	75	17.69	18	32.14	0.011	0.112	(B) BRAF Class 2 Melanoma
PBRM1	3p21.1	23	3.02	9	8.41	0.0113	0.114	(B) BRAF Class 2 Melanoma
ARAF	Xp11.3	7	0.85	5	4.20	0.0114	0.114	(B) BRAF Class 2 Melanoma
LIG4	13q33.3	5	2.50	4	15.38	0.0118	0.117	(B) BRAF Class 2 Melanoma
PMS1	2q32.2	15	2.14	7	7.14	0.012	0.118	(B) BRAF Class 2 Melanoma
AR	Xq12	31	3.85	12	9.02	0.0121	0.118	(B) BRAF Class 2 Melanoma
CDK8	13q12.13	11	1.53	6	5.88	0.0124	0.119	(B) BRAF Class 2 Melanoma
JAK3	19p13.11	35	3.16	12	7.27	0.013	0.123	(B) BRAF Class 2 Melanoma
DCC	18q21.2	13	16.46	4	66.67	0.0134	0.126	(B) BRAF Class 2 Melanoma
EP300	22q13.2	42	5.45	13	11.71	0.0143	0.13	(B) BRAF Class 2 Melanoma
ICOSLG	21q22.3	2	0.49	3	5.26	0.0147	0.13	(B) BRAF Class 2 Melanoma
HIST1H3G	6p22.2	2	0.51	3	5.45	0.0148	0.13	(B) BRAF Class 2 Melanoma
HIST3H3	1q42.13	2	0.51	3	5.45	0.0148	0.13	(B) BRAF Class 2 Melanoma
IFNGR1	6q23.3	0	0.00	2	3.51	0.0149	0.13	(B) BRAF Class 2 Melanoma
ERCC3	2q14.3	12	1.80	6	6.52	0.015	0.13	(B) BRAF Class 2 Melanoma
CDH23	10q22.1	2	8.00	0	0.00	0.0151	0.13	(A) BRAF Class 1 Melanoma
PCDHAC2	5q31.3	2	8.00	0	0.00	0.0151	0.13	(A) BRAF Class 1 Melanoma
TGFB1	19q13.2	2	8.00	0	0.00	0.0151	0.13	(A) BRAF Class 1 Melanoma
PIK3C2G	12p12.3	47	9.96	14	20.00	0.0155	0.13	(B) BRAF Class 2 Melanoma
GALNT12	9q22.33	0	0.00	2	5.13	0.0155	0.13	(B) BRAF Class 2 Melanoma
KEL	7q34	22	9.21	6	28.57	0.0157	0.131	(B) BRAF Class 2 Melanoma
MLH1	3p22.2	17	1.53	7	4.76	0.0161	0.133	(B) BRAF Class 2 Melanoma
ADGRB3	6q12-q13	2	7.69	0	0.00	0.0162	0.133	(A) BRAF Class 1 Melanoma
SPOP	17q21.33	5	0.66	4	3.77	0.0168	0.137	(B) BRAF Class 2 Melanoma
NBN	8q21.3	16	2.00	7	6.14	0.0171	0.138	(B) BRAF Class 2 Melanoma
DNAH9	17p12	2	7.41	0	0.00	0.0173	0.138	(A) BRAF Class 1 Melanoma
PTPRT	20q12-q13.11	89	19.02	20	31.75	0.0175	0.138	(B) BRAF Class 2 Melanoma
PTPN11	12q24.13	13	1.16	6	3.97	0.0183	0.143	(B) BRAF Class 2 Melanoma
PIK3CG	7q22.3	30	5.69	10	13.33	0.0184	0.143	(B) BRAF Class 2 Melanoma
FGF14	13q33.1	4	1.38	3	10.34	0.0187	0.144	(B) BRAF Class 2 Melanoma
DICER1	14q32.13	25	3.32	9	8.33	0.019	0.145	(B) BRAF Class 2 Melanoma
AXL	19q13.2	30	3.73	10	8.77	0.0191	0.145	(B) BRAF Class 2 Melanoma
NTRK3	15q25.3	50	6.21	14	12.28	0.0194	0.146	(B) BRAF Class 2 Melanoma
MAP3K13	3q27.2	12	2.54	6	8.57	0.0196	0.146	(B) BRAF Class 2 Melanoma
GPC3	Xq26.2	6	1.94	4	9.76	0.0201	0.148	(B) BRAF Class 2 Melanoma
MST1R	3p21.31	13	2.77	6	9.09	0.0207	0.152	(B) BRAF Class 2 Melanoma
MTA1	14q32.33	3	1.50	3	11.54	0.0215	0.157	(B) BRAF Class 2 Melanoma
IKZF1	7p12.2	60	7.84	16	14.41	0.0217	0.157	(B) BRAF Class 2 Melanoma
TP63	3q28	38	8.96	11	18.97	0.022	0.157	(B) BRAF Class 2 Melanoma
GLI1	12q13.3	30	4.12	10	9.43	0.0221	0.157	(B) BRAF Class 2 Melanoma
ICK	6p12.1	0	0.00	1	100.00	0.0227	0.16	(B) BRAF Class 2 Melanoma
HIST1H1E	6p22.2	0	0.00	1	100.00	0.0233	0.163	(B) BRAF Class 2 Melanoma
ERCC1	19q13.32	1	0.26	2	5.13	0.0237	0.164	(B) BRAF Class 2 Melanoma
KDM6A	Xp11.3	13	1.69	6	5.41	0.0238	0.164	(B) BRAF Class 2 Melanoma
SPRED1	15q14	2	0.97	3	8.33	0.0243	0.164	(B) BRAF Class 2 Melanoma
RIF1	2q23.3	11	5.50	5	19.23	0.0245	0.164	(B) BRAF Class 2 Melanoma
PLCG2	16q23.3	18	3.85	7	10.61	0.0249	0.164	(B) BRAF Class 2 Melanoma
ABCB11	2q31.1	11	4.95	5	17.24	0.0255	0.164	(B) BRAF Class 2 Melanoma
DNMT3A	2p23.3	26	3.34	9	7.89	0.0259	0.164	(B) BRAF Class 2 Melanoma
BRCA2	13q13.1	57	7.09	15	13.04	0.026	0.164	(B) BRAF Class 2 Melanoma
BARD1	2q35	6	0.83	4	3.92	0.0261	0.164	(B) BRAF Class 2 Melanoma
ARID1B	6q25.3	46	6.18	13	12.04	0.0265	0.164	(B) BRAF Class 2 Melanoma
PTPRB	12q15	5	9.26	3	50.00	0.0266	0.164	(B) BRAF Class 2 Melanoma
SNCAIP	5q23.2	36	13.09	8	29.63	0.0275	0.164	(B) BRAF Class 2 Melanoma
MEF2B	19p13.11	6	0.78	4	3.60	0.0275	0.164	(B) BRAF Class 2 Melanoma
CAD	2p23.3	0	0.00	1	100.00	0.0278	0.164	(B) BRAF Class 2 Melanoma
CPS1	2q34	0	0.00	1	100.00	0.0278	0.164	(B) BRAF Class 2 Melanoma
INPP5D	2q37.1	0	0.00	1	100.00	0.0278	0.164	(B) BRAF Class 2 Melanoma
JARID2	6p22.3	0	0.00	1	100.00	0.0278	0.164	(B) BRAF Class 2 Melanoma
MEF2C	5q14.3	0	0.00	1	100.00	0.0278	0.164	(B) BRAF Class 2 Melanoma
MKI67	10q26.2	0	0.00	1	100.00	0.0278	0.164	(B) BRAF Class 2 Melanoma
PC	11q13.2	0	0.00	1	100.00	0.0278	0.164	(B) BRAF Class 2 Melanoma
PCLO	7q21.11	0	0.00	1	100.00	0.0278	0.164	(B) BRAF Class 2 Melanoma
PTPN6	12p13.31	0	0.00	1	100.00	0.0278	0.164	(B) BRAF Class 2 Melanoma
TNFRSF11A	18q21.33	0	0.00	1	100.00	0.0278	0.164	(B) BRAF Class 2 Melanoma
WDR90	16p13.3	0	0.00	1	100.00	0.0278	0.164	(B) BRAF Class 2 Melanoma
NSD3	8p11.23	9	2.46	5	8.77	0.0286	0.167	(B) BRAF Class 2 Melanoma
RASA1	5q14.3	14	2.24	6	6.74	0.0288	0.167	(B) BRAF Class 2 Melanoma
DDX41	5q35.3	2	1.03	2	12.50	0.0297	0.171	(B) BRAF Class 2 Melanoma
ZFHX4	8q21.13	11	20.37	4	66.67	0.0298	0.171	(B) BRAF Class 2 Melanoma
IL7R	5p13.2	48	6.77	13	12.87	0.0301	0.172	(B) BRAF Class 2 Melanoma
MYD88	3p22.2	10	1.23	5	4.27	0.0309	0.175	(B) BRAF Class 2 Melanoma
CASR	3q13.33-q21.1	3	7.50	2	66.67	0.0316	0.178	(B) BRAF Class 2 Melanoma
ITK	5q33.3	4	1.93	3	11.54	0.032	0.18	(B) BRAF Class 2 Melanoma
SPTA1	1q23.1	53	20.08	10	38.46	0.0325	0.181	(B) BRAF Class 2 Melanoma
PRPF8	17p13.3	1	1.05	2	16.67	0.0327	0.181	(B) BRAF Class 2 Melanoma
LRP1B	2q22.1-q22.2	86	30.82	14	50.00	0.0345	0.19	(B) BRAF Class 2 Melanoma
BCL11B	14q32.2	14	6.03	5	18.52	0.035	0.191	(B) BRAF Class 2 Melanoma
EME1	17q21.33	1	0.50	2	7.69	0.0356	0.193	(B) BRAF Class 2 Melanoma
CDKN2B	9p21.3	113	14.09	24	21.24	0.0356	0.193	(B) BRAF Class 2 Melanoma
COL1A1	17q21.33	3	3.70	2	33.33	0.0364	0.194	(B) BRAF Class 2 Melanoma
NCOA2	8q13.3	3	3.70	2	33.33	0.0364	0.194	(B) BRAF Class 2 Melanoma
NUTM1	15q14	17	7.42	4	25.00	0.0369	0.195	(B) BRAF Class 2 Melanoma
IDH1	2q34	42	3.56	12	6.86	0.0371	0.195	(B) BRAF Class 2 Melanoma
NFE2L2	2q31.2	7	0.87	4	3.48	0.038	0.199	(B) BRAF Class 2 Melanoma
NLRP1	17p13.2	2	4.65	0	0.00	0.0382	0.199	(A) BRAF Class 1 Melanoma
ETV1	7p21.2	15	2.08	6	5.77	0.0387	0.2	(B) BRAF Class 2 Melanoma
SMC1A	Xp11.22	2	0.73	2	7.69	0.0389	0.2	(B) BRAF Class 2 Melanoma
ABL1	9q34.12	26	2.42	8	5.56	0.039	0.2	(B) BRAF Class 2 Melanoma
PRKCI	3q26.2	16	2.56	6	6.98	0.0397	0.203	(B) BRAF Class 2 Melanoma
NFKBIZ	3q12.3	1	0.40	2	5.71	0.0407	0.205	(B) BRAF Class 2 Melanoma
ASXL1	20q11.21	29	3.73	9	7.96	0.0411	0.205	(B) BRAF Class 2 Melanoma
CDH11	16q21	2	4.44	0	0.00	0.0411	0.205	(A) BRAF Class 1 Melanoma
NIN	14q22.1	2	4.44	0	0.00	0.0411	0.205	(A) BRAF Class 1 Melanoma
SMARCB1	22q11.23|22q11	8	0.72	4	2.74	0.0413	0.205	(B) BRAF Class 2 Melanoma
PTPRO	12p12.3|12p13-p12	0	0.00	1	50.00	0.0417	0.205	(B) BRAF Class 2 Melanoma
KAT6A	8p11.21	20	4.29	6	11.11	0.0423	0.206	(B) BRAF Class 2 Melanoma
DAXX	6p21.32	16	2.27	6	6.06	0.0428	0.206	(B) BRAF Class 2 Melanoma
MN1	22q12.1	0	0.00	1	33.33	0.0429	0.206	(B) BRAF Class 2 Melanoma
PTPRS	19p13.3	21	5.16	7	12.28	0.0432	0.206	(B) BRAF Class 2 Melanoma
SDHB	1p36.13	1	0.13	2	1.82	0.0432	0.206	(B) BRAF Class 2 Melanoma
RAD51	15q15.1	4	0.53	3	2.86	0.0433	0.206	(B) BRAF Class 2 Melanoma
PPP4R2	3p13	3	1.75	3	10.00	0.0441	0.209	(B) BRAF Class 2 Melanoma
XRCC2	7q36.1	12	1.82	5	5.49	0.0447	0.21	(B) BRAF Class 2 Melanoma
USP6	17p13.2	0	0.00	1	33.33	0.0448	0.21	(B) BRAF Class 2 Melanoma
NF2	22q12.2	16	1.98	6	5.22	0.0456	0.213	(B) BRAF Class 2 Melanoma
ADGRA2	8p11.23	6	2.29	3	10.71	0.0457	0.213	(B) BRAF Class 2 Melanoma
RNF43	17q22	12	1.59	5	4.76	0.046	0.213	(B) BRAF Class 2 Melanoma
NCOR2	12q24.31	1	2.38	1	100.00	0.0465	0.214	(B) BRAF Class 2 Melanoma
CD74	5q33.1	0	0.00	1	10.00	0.0476	0.218	(B) BRAF Class 2 Melanoma
PIK3CA	3q26.32	34	2.88	10	5.71	0.0479	0.218	(B) BRAF Class 2 Melanoma
NT5C2	10q24.32-q24.33	5	1.85	3	8.82	0.0481	0.218	(B) BRAF Class 2 Melanoma
PIM1	6p21.2	8	1.19	4	4.26	0.0484	0.218	(B) BRAF Class 2 Melanoma
ZNF217	20q13.2	14	2.69	5	7.69	0.0488	0.219	(B) BRAF Class 2 Melanoma
RHBDF2	17q25.1	5	2.50	3	11.54	0.0514	0.229	(B) BRAF Class 2 Melanoma
BCOR	Xp11.4	36	4.68	10	9.01	0.0528	0.235	(B) BRAF Class 2 Melanoma
CDKN2A	9p21.3	298	26.49	50	33.11	0.0545	0.241	(B) BRAF Class 2 Melanoma
MAP2K1	15q22.31	51	5.81	14	9.86	0.0552	0.242	(B) BRAF Class 2 Melanoma
PDCD11	10q24.33	1	2.86	1	100.00	0.0556	0.242	(B) BRAF Class 2 Melanoma
WWTR1	3q25.1	1	0.51	2	6.06	0.0556	0.242	(B) BRAF Class 2 Melanoma
ALK	2p23.2-p23.1	72	6.10	17	9.71	0.056	0.243	(B) BRAF Class 2 Melanoma
TCF3	19p13.3	13	1.98	5	5.49	0.0567	0.244	(B) BRAF Class 2 Melanoma
ERG	21q22.2	27	3.75	8	7.84	0.057	0.244	(B) BRAF Class 2 Melanoma
PLCB4	20p12.3-p12.2	5	7.14	3	30.00	0.0572	0.244	(B) BRAF Class 2 Melanoma
CTNNA1	5q31.2	6	1.27	3	5.45	0.0574	0.244	(B) BRAF Class 2 Melanoma
SESN2	1p35.3	1	0.58	2	6.67	0.0588	0.249	(B) BRAF Class 2 Melanoma
PTCH1	9q22.32	27	3.35	8	6.96	0.0596	0.251	(B) BRAF Class 2 Melanoma
NSD1	5q35.3	48	6.82	12	11.88	0.0597	0.251	(B) BRAF Class 2 Melanoma
PGR	11q22.1	18	4.59	6	10.91	0.0607	0.252	(B) BRAF Class 2 Melanoma
SS18	18q11.2	2	0.77	2	6.25	0.0607	0.252	(B) BRAF Class 2 Melanoma
SYNE1	6q25.2	5	2.50	2	15.38	0.0608	0.252	(B) BRAF Class 2 Melanoma
RPS6KA4	11q13.1	9	2.21	4	7.02	0.0627	0.257	(B) BRAF Class 2 Melanoma
SOX17	8q11.23	5	1.23	3	5.26	0.0628	0.257	(B) BRAF Class 2 Melanoma
TNFRSF14	1p36.32	5	0.93	3	4.00	0.0629	0.257	(B) BRAF Class 2 Melanoma
RSPO3	6q22.33	2	0.79	2	6.25	0.0635	0.258	(B) BRAF Class 2 Melanoma
IRF4	6p25.3	5	0.93	3	3.95	0.0645	0.26	(B) BRAF Class 2 Melanoma
TNFAIP3	6q23.3	13	1.69	5	4.50	0.0645	0.26	(B) BRAF Class 2 Melanoma
TLX3	5q35.1	2	0.99	2	7.69	0.0651	0.261	(B) BRAF Class 2 Melanoma
GREM1	15q13.3	5	0.74	3	3.13	0.0653	0.261	(B) BRAF Class 2 Melanoma
NECTIN4	1q23.3	2	1.00	2	7.69	0.0662	0.263	(B) BRAF Class 2 Melanoma
INHBA	7p14.1	23	4.50	7	9.59	0.0673	0.266	(B) BRAF Class 2 Melanoma
TBX3	12q24.21	28	5.30	8	10.53	0.0689	0.27	(B) BRAF Class 2 Melanoma
MGA	15q15.1	67	10.98	15	17.24	0.0692	0.27	(B) BRAF Class 2 Melanoma
MEN1	11q13.1	9	1.17	4	3.60	0.0692	0.27	(B) BRAF Class 2 Melanoma
GNA14	9q21.2	0	0.00	1	33.33	0.0698	0.27	(B) BRAF Class 2 Melanoma
HTRA1	10q26.13	0	0.00	1	33.33	0.0698	0.27	(B) BRAF Class 2 Melanoma
PIK3C3	18q12.3	5	1.07	3	4.35	0.0707	0.272	(B) BRAF Class 2 Melanoma
PAXIP1	7q36.2	6	3.00	3	11.54	0.0712	0.273	(B) BRAF Class 2 Melanoma
FGFR3	4p16.3	32	2.71	9	5.14	0.0716	0.273	(B) BRAF Class 2 Melanoma
EPHA5	4q13.1-q13.2	18	3.13	6	7.14	0.0718	0.273	(B) BRAF Class 2 Melanoma
CDK12	17q12	24	3.18	7	6.67	0.0723	0.274	(B) BRAF Class 2 Melanoma
KDM5C	Xp11.22	24	3.15	7	6.54	0.0751	0.282	(B) BRAF Class 2 Melanoma
CHEK1	11q24.2	2	0.26	2	1.90	0.0751	0.282	(B) BRAF Class 2 Melanoma
HIST1H2BD	6p22.2	2	0.49	2	3.51	0.0756	0.283	(B) BRAF Class 2 Melanoma
PRKCA	17q24.2	0	0.00	1	16.67	0.0759	0.283	(B) BRAF Class 2 Melanoma
PRKACA	19p13.12	0	0.00	1	16.67	0.0779	0.288	(B) BRAF Class 2 Melanoma
SMAD3	15q22.33	2	0.39	2	2.74	0.078	0.288	(B) BRAF Class 2 Melanoma
RAF1	3p25.2	8	0.97	4	2.92	0.0787	0.29	(B) BRAF Class 2 Melanoma
PIK3C2B	1q32.1	24	5.01	6	10.71	0.0812	0.296	(B) BRAF Class 2 Melanoma
ROS1	6q22.1	147	17.09	31	22.46	0.0816	0.296	(B) BRAF Class 2 Melanoma
SETBP1	18q12.3	38	8.30	8	15.38	0.0817	0.296	(B) BRAF Class 2 Melanoma
CHD4	12p13.31	9	3.41	3	11.54	0.0817	0.296	(B) BRAF Class 2 Melanoma
EWSR1	22q12.2	7	1.34	3	4.76	0.0824	0.297	(B) BRAF Class 2 Melanoma
AXIN2	17q24.1	20	3.12	6	6.74	0.0842	0.302	(B) BRAF Class 2 Melanoma
MAP2K4	17p12	10	1.25	4	3.51	0.0844	0.302	(B) BRAF Class 2 Melanoma
DGKH	13q14.11	0	0.00	1	33.33	0.0857	0.304	(B) BRAF Class 2 Melanoma
PRKCH	14q23.1	0	0.00	1	33.33	0.0857	0.304	(B) BRAF Class 2 Melanoma
EBF1	5q33.3	0	0.00	1	14.29	0.0875	0.308	(B) BRAF Class 2 Melanoma
FOXL2	3q22.3	6	0.79	3	2.83	0.0876	0.308	(B) BRAF Class 2 Melanoma
ASXL2	2p23.3	25	5.64	7	11.11	0.088	0.309	(B) BRAF Class 2 Melanoma
WT1	11p13	24	3.08	7	6.14	0.0885	0.309	(B) BRAF Class 2 Melanoma
HGF	7q21.11	36	6.70	9	11.84	0.09	0.313	(B) BRAF Class 2 Melanoma
BMPR1A	10q23.2	6	0.81	3	2.86	0.0903	0.313	(B) BRAF Class 2 Melanoma
NTHL1	16p13.3	2	0.53	2	3.39	0.091	0.314	(B) BRAF Class 2 Melanoma
ATRX	Xq21.1	47	5.84	11	9.65	0.0915	0.315	(B) BRAF Class 2 Melanoma
CDH1	16q22.1	16	1.49	5	3.47	0.0917	0.315	(B) BRAF Class 2 Melanoma
MTOR	1p36.22	41	4.75	11	7.91	0.0923	0.315	(B) BRAF Class 2 Melanoma
CBL	11q23.3	30	3.69	8	6.84	0.0926	0.315	(B) BRAF Class 2 Melanoma
KIT	4q12	24	2.03	7	4.00	0.0939	0.318	(B) BRAF Class 2 Melanoma
MLH3	14q24.3	3	1.15	2	6.25	0.0944	0.318	(B) BRAF Class 2 Melanoma
HOXB13	17q21.32	6	0.90	3	3.09	0.0945	0.318	(B) BRAF Class 2 Melanoma
CAMTA1	1p36.31-p36.23	1	1.69	1	33.33	0.0952	0.318	(B) BRAF Class 2 Melanoma
NCOR1	17p12-p11.2	30	5.84	8	10.67	0.0953	0.318	(B) BRAF Class 2 Melanoma
FGFR4	5q35.2	26	3.20	8	5.93	0.0969	0.323	(B) BRAF Class 2 Melanoma
GATA3	10p14	20	2.60	6	5.36	0.0999	0.331	(B) BRAF Class 2 Melanoma
RAD21	8q24.11	16	2.28	5	5.10	0.102	0.337	(B) BRAF Class 2 Melanoma
RINT1	7q22.3	3	1.50	2	7.69	0.102	0.337	(B) BRAF Class 2 Melanoma
PRSS1	7q34	17	6.39	5	13.89	0.105	0.34	(B) BRAF Class 2 Melanoma
CHD5	1p36.31	4	7.41	2	33.33	0.105	0.34	(B) BRAF Class 2 Melanoma
AXIN1	16p13.3	11	2.10	4	5.33	0.105	0.34	(B) BRAF Class 2 Melanoma
STAT4	2q32.2-q32.3	10	3.60	3	10.71	0.105	0.34	(B) BRAF Class 2 Melanoma
FH	1q43	11	1.44	4	3.67	0.105	0.34	(B) BRAF Class 2 Melanoma
FOXF1	16q24.1	1	4.76	0	0.00	0.107	0.344	(A) BRAF Class 1 Melanoma
SLFN11	17q12	1	4.76	0	0.00	0.107	0.344	(A) BRAF Class 1 Melanoma
STAT5B	17q21.2	3	0.72	2	3.57	0.109	0.349	(B) BRAF Class 2 Melanoma
MLLT3	9p21.3	1	0.60	1	10.00	0.11	0.349	(B) BRAF Class 2 Melanoma
PRPF40B	12q13.12	0	0.00	1	8.33	0.112	0.356	(B) BRAF Class 2 Melanoma
BRCA1	17q21.31	32	3.98	9	6.77	0.113	0.358	(B) BRAF Class 2 Melanoma
EPHB1	3q22.2	27	5.02	7	9.21	0.113	0.358	(B) BRAF Class 2 Melanoma
FGF8	10q24.32	1	0.63	1	10.00	0.115	0.36	(B) BRAF Class 2 Melanoma
MCM7	7q22.1	1	4.35	0	0.00	0.116	0.36	(A) BRAF Class 1 Melanoma
E2F3	6p22.3	3	0.74	2	3.51	0.116	0.36	(B) BRAF Class 2 Melanoma
H3F3C	12p11.21	3	0.74	2	3.51	0.116	0.36	(B) BRAF Class 2 Melanoma
CENPA	2p23.3	3	0.77	2	3.64	0.117	0.36	(B) BRAF Class 2 Melanoma
HIST1H3I	6p22.1	3	0.77	2	3.64	0.117	0.36	(B) BRAF Class 2 Melanoma
BTK	Xq22.1	12	2.10	4	5.06	0.117	0.36	(B) BRAF Class 2 Melanoma
SMO	7q32.1	36	3.25	9	5.45	0.118	0.36	(B) BRAF Class 2 Melanoma
IGF2	11p15.5	7	0.99	3	2.97	0.118	0.36	(B) BRAF Class 2 Melanoma
MYCN	2p24.3	14	1.74	5	3.76	0.119	0.36	(B) BRAF Class 2 Melanoma
MRE11	11q21	17	2.25	5	4.76	0.119	0.36	(B) BRAF Class 2 Melanoma
USP28	11q23.2	8	4.00	3	11.54	0.119	0.36	(B) BRAF Class 2 Melanoma
PTPRD	9p24.1-p23	88	15.74	17	21.79	0.119	0.36	(B) BRAF Class 2 Melanoma
AURKB	17p13.1	7	0.91	3	2.70	0.121	0.362	(B) BRAF Class 2 Melanoma
RECQL4	8q24.3	35	5.15	8	8.79	0.122	0.362	(B) BRAF Class 2 Melanoma
AKT2	19q13.2	12	1.49	4	3.51	0.125	0.362	(B) BRAF Class 2 Melanoma
CACNA1E	1q25.3	1	4.00	0	0.00	0.125	0.362	(A) BRAF Class 1 Melanoma
GNAI3	1p13.3	1	4.00	0	0.00	0.125	0.362	(A) BRAF Class 1 Melanoma
LRIG3	12q14.1	1	4.00	0	0.00	0.125	0.362	(A) BRAF Class 1 Melanoma
SP140	2q37.1	1	4.00	0	0.00	0.125	0.362	(A) BRAF Class 1 Melanoma
UMODL1	21q22.3	1	4.00	0	0.00	0.125	0.362	(A) BRAF Class 1 Melanoma
STK11	19p13.3	18	1.60	5	3.31	0.126	0.362	(B) BRAF Class 2 Melanoma
BCL2	18q21.33	0	0.00	1	0.91	0.126	0.362	(B) BRAF Class 2 Melanoma
FGF6	12p13.32	5	1.73	2	6.90	0.127	0.362	(B) BRAF Class 2 Melanoma
PGBD3	10q11.23	3	0.25	2	1.14	0.127	0.362	(B) BRAF Class 2 Melanoma
KDM6B	17p13.1	4	5.48	2	22.22	0.128	0.362	(B) BRAF Class 2 Melanoma
EPHA3	3p11.1	44	7.48	10	11.76	0.128	0.362	(B) BRAF Class 2 Melanoma
MDM2	12q15	12	1.49	4	3.48	0.128	0.362	(B) BRAF Class 2 Melanoma
POLQ	3q13.33	13	6.07	4	13.79	0.129	0.362	(B) BRAF Class 2 Melanoma
C5ORF22	5p13.3	0	0.00	1	0.57	0.129	0.362	(B) BRAF Class 2 Melanoma
KCNJ1	11q24.3	0	0.00	1	0.57	0.129	0.362	(B) BRAF Class 2 Melanoma
LAMC3	9q34.12	0	0.00	1	0.57	0.129	0.362	(B) BRAF Class 2 Melanoma
PEX5	12p13.31	0	0.00	1	0.57	0.129	0.362	(B) BRAF Class 2 Melanoma
VPREB1	22q11.22	0	0.00	1	0.57	0.129	0.362	(B) BRAF Class 2 Melanoma
VRK2	2p16.1	0	0.00	1	0.57	0.129	0.362	(B) BRAF Class 2 Melanoma
GNB1	1p36.33	1	3.85	0	0.00	0.129	0.362	(A) BRAF Class 1 Melanoma
PAX3	2q36.1	1	0.45	1	6.25	0.13	0.364	(B) BRAF Class 2 Melanoma
NFKBIE	6p21.1	8	3.39	3	9.38	0.131	0.365	(B) BRAF Class 2 Melanoma
SETD2	3p21.31	57	7.08	12	10.53	0.133	0.369	(B) BRAF Class 2 Melanoma
GNA11	19p13.3	7	0.63	3	1.78	0.134	0.369	(B) BRAF Class 2 Melanoma
RPL22	1p36.31	1	3.70	0	0.00	0.134	0.369	(A) BRAF Class 1 Melanoma
ERCC5	13q33.1	18	2.70	5	5.43	0.135	0.37	(B) BRAF Class 2 Melanoma
FRK	6q22.1	1	2.50	1	33.33	0.136	0.37	(B) BRAF Class 2 Melanoma
GLMN	1p22.1	1	2.50	1	33.33	0.136	0.37	(B) BRAF Class 2 Melanoma
NRIP1	21q11.2-q21.1	1	2.50	1	33.33	0.136	0.37	(B) BRAF Class 2 Melanoma
ZFPM1	16q24.2	1	2.50	1	33.33	0.136	0.37	(B) BRAF Class 2 Melanoma
NRG1	8p12	18	4.74	4	10.26	0.137	0.372	(B) BRAF Class 2 Melanoma
MAP2K2	19p13.3	15	1.99	5	4.03	0.138	0.374	(B) BRAF Class 2 Melanoma
PHOX2B	4p13	18	2.56	5	5.10	0.139	0.375	(B) BRAF Class 2 Melanoma
PTPRK	6q22.33	5	9.26	2	33.33	0.14	0.375	(B) BRAF Class 2 Melanoma
TERT	5p15.33	460	61.01	71	66.98	0.14	0.375	(B) BRAF Class 2 Melanoma
SHQ1	3p13	8	1.97	3	5.26	0.142	0.378	(B) BRAF Class 2 Melanoma
MCM8	20p12.3	4	2.00	2	7.69	0.143	0.379	(B) BRAF Class 2 Melanoma
XRCC4	5q14.2	4	2.00	2	7.69	0.143	0.379	(B) BRAF Class 2 Melanoma
ZRSR2	Xp22.2	8	1.16	3	3.09	0.143	0.379	(B) BRAF Class 2 Melanoma
CBFA2T3	16q24.3	9	4.46	3	11.54	0.144	0.38	(B) BRAF Class 2 Melanoma
ERCC4	16p13.12	18	2.48	5	4.85	0.146	0.384	(B) BRAF Class 2 Melanoma
SOS1	2p22.1	7	1.80	3	4.84	0.146	0.384	(B) BRAF Class 2 Melanoma
PDGFRA	4q12	50	4.33	11	6.47	0.148	0.386	(B) BRAF Class 2 Melanoma
RRAS2	11p15.2	0	0.00	1	2.78	0.148	0.386	(B) BRAF Class 2 Melanoma
MYCL	1p34.2	8	0.99	3	2.61	0.149	0.386	(B) BRAF Class 2 Melanoma
UPF1	19p13.11	0	0.00	1	3.33	0.149	0.387	(B) BRAF Class 2 Melanoma
RASA2	3q23	1	1.41	1	16.67	0.151	0.39	(B) BRAF Class 2 Melanoma
SPEN	1p36.21-p36.13	53	9.87	11	14.47	0.152	0.391	(B) BRAF Class 2 Melanoma
REL	2p16.1	8	1.04	3	2.70	0.152	0.391	(B) BRAF Class 2 Melanoma
EGFR	7p11.2	50	4.24	11	6.29	0.153	0.391	(B) BRAF Class 2 Melanoma
ZBTB2	6q25.1	1	0.44	1	5.00	0.155	0.396	(B) BRAF Class 2 Melanoma
SUFU	10q24.32	13	1.69	4	3.60	0.156	0.397	(B) BRAF Class 2 Melanoma
GABRA6	5q34	7	2.93	2	9.52	0.159	0.402	(B) BRAF Class 2 Melanoma
CDH4	20q13.33	15	7.50	4	15.38	0.159	0.402	(B) BRAF Class 2 Melanoma
FGF10	5p12	6	2.08	2	6.90	0.159	0.402	(B) BRAF Class 2 Melanoma
FUBP1	1p31.1	4	0.76	2	2.74	0.16	0.402	(B) BRAF Class 2 Melanoma
SLC34A2	4p15.2	11	4.80	3	11.54	0.16	0.402	(B) BRAF Class 2 Melanoma
MECOM	3q26.2	39	14.77	8	22.86	0.161	0.402	(B) BRAF Class 2 Melanoma
RYBP	3p13	4	0.98	2	3.51	0.161	0.402	(B) BRAF Class 2 Melanoma
CD79A	19q13.2	4	0.76	2	2.70	0.161	0.402	(B) BRAF Class 2 Melanoma
NEGR1	1p31.1	14	3.23	4	6.67	0.163	0.406	(B) BRAF Class 2 Melanoma
LYN	8q12.1	15	3.83	4	7.84	0.164	0.406	(B) BRAF Class 2 Melanoma
TSC1	9q34.13	30	3.71	7	6.09	0.166	0.411	(B) BRAF Class 2 Melanoma
BCL2L12	19q13.33	4	1.52	2	5.26	0.167	0.411	(B) BRAF Class 2 Melanoma
CNOT3	19q13.42	1	1.64	1	16.67	0.172	0.424	(B) BRAF Class 2 Melanoma
MSH3	5q14.1	10	2.66	3	6.25	0.173	0.424	(B) BRAF Class 2 Melanoma
INPPL1	11q13.4	7	4.09	3	10.00	0.173	0.424	(B) BRAF Class 2 Melanoma
NIPBL	5p13.2	1	1.69	1	16.67	0.177	0.432	(B) BRAF Class 2 Melanoma
PDCD1LG2	9p24.1	9	1.36	3	3.19	0.179	0.434	(B) BRAF Class 2 Melanoma
BRCC3	Xq28	5	2.44	2	7.69	0.18	0.435	(B) BRAF Class 2 Melanoma
IGF1R	15q26.3	42	5.17	9	7.69	0.18	0.435	(B) BRAF Class 2 Melanoma
ERBB2	17q12	24	2.03	6	3.43	0.181	0.437	(B) BRAF Class 2 Melanoma
MUTYH	1p34.1	14	1.82	4	3.60	0.182	0.437	(B) BRAF Class 2 Melanoma
HNRNPK	9q21.32	2	1.06	1	7.69	0.183	0.438	(B) BRAF Class 2 Melanoma
AURKA	20q13.2	9	1.17	3	2.70	0.184	0.439	(B) BRAF Class 2 Melanoma
JAK2	9p24.1	24	2.17	6	3.64	0.184	0.439	(B) BRAF Class 2 Melanoma
LZTR1	22q11.21|22q11.1-q11.2	7	2.62	2	7.69	0.185	0.441	(B) BRAF Class 2 Melanoma
PTPN14	1q32.3-q41	5	2.50	2	7.69	0.186	0.442	(B) BRAF Class 2 Melanoma
WAS	Xp11.23	6	2.59	2	7.69	0.187	0.443	(B) BRAF Class 2 Melanoma
EPHB4	7q22.1	1	0.80	1	7.14	0.192	0.443	(B) BRAF Class 2 Melanoma
FAT3	11q14.3	8	7.41	3	16.67	0.193	0.443	(B) BRAF Class 2 Melanoma
TAL1	1p33	6	2.64	2	7.69	0.193	0.443	(B) BRAF Class 2 Melanoma
BCL10	1p22.3	5	1.20	2	3.57	0.196	0.443	(B) BRAF Class 2 Melanoma
PPP2R1A	19q13.41	15	1.99	4	3.77	0.197	0.443	(B) BRAF Class 2 Melanoma
AURKC	19q13.43	1	2.33	0	0.00	0.197	0.443	(A) BRAF Class 1 Melanoma
CSMD3	8q23.3	1	2.33	0	0.00	0.197	0.443	(A) BRAF Class 1 Melanoma
CYP2C19	10q23.33	1	2.33	0	0.00	0.197	0.443	(A) BRAF Class 1 Melanoma
DST	6p12.1	1	2.33	0	0.00	0.197	0.443	(A) BRAF Class 1 Melanoma
FN1	2q35	1	2.33	0	0.00	0.197	0.443	(A) BRAF Class 1 Melanoma
FOXP4	6p21.1	1	2.33	0	0.00	0.197	0.443	(A) BRAF Class 1 Melanoma
GDNF	5p13.2	1	2.33	0	0.00	0.197	0.443	(A) BRAF Class 1 Melanoma
GUCY1A2	11q22.3	1	2.33	0	0.00	0.197	0.443	(A) BRAF Class 1 Melanoma
IKBKB	8p11.21	1	2.33	0	0.00	0.197	0.443	(A) BRAF Class 1 Melanoma
ITGA10	1q21.1	1	2.33	0	0.00	0.197	0.443	(A) BRAF Class 1 Melanoma
STK36	2q35	1	2.33	0	0.00	0.197	0.443	(A) BRAF Class 1 Melanoma
TNK2	3q29	1	2.33	0	0.00	0.197	0.443	(A) BRAF Class 1 Melanoma
TRIM24	7q33-q34	1	2.33	0	0.00	0.197	0.443	(A) BRAF Class 1 Melanoma
CRTC1	19p13.11	11	3.97	3	8.57	0.199	0.443	(B) BRAF Class 2 Melanoma
SAMD9L	7q21.2	2	5.00	1	33.33	0.199	0.443	(B) BRAF Class 2 Melanoma
FANCL	2p16.1	6	1.27	2	3.64	0.2	0.443	(B) BRAF Class 2 Melanoma
TMPRSS2	21q22.3	15	2.10	4	3.96	0.2	0.443	(B) BRAF Class 2 Melanoma
ASPSCR1	17q25.3	1	2.27	0	0.00	0.201	0.443	(A) BRAF Class 1 Melanoma
PRDM16	1p36.32	1	2.27	0	0.00	0.201	0.443	(A) BRAF Class 1 Melanoma
RBM15	1p13.3	1	2.27	0	0.00	0.201	0.443	(A) BRAF Class 1 Melanoma
ETV5	3q27.2	12	2.47	3	5.26	0.202	0.443	(B) BRAF Class 2 Melanoma
CXCR4	2q22.1	5	0.78	2	2.27	0.204	0.443	(B) BRAF Class 2 Melanoma
ARNT	1q21.3	1	2.22	0	0.00	0.205	0.443	(A) BRAF Class 1 Melanoma
KNL1	15q15.1	1	2.22	0	0.00	0.205	0.443	(A) BRAF Class 1 Melanoma
NFKB2	10q24.32	1	2.22	0	0.00	0.205	0.443	(A) BRAF Class 1 Melanoma
PDE4DIP	1q21.2	1	2.22	0	0.00	0.205	0.443	(A) BRAF Class 1 Melanoma
PER1	17p13.1	1	2.22	0	0.00	0.205	0.443	(A) BRAF Class 1 Melanoma
TPR	1q31.1	1	2.22	0	0.00	0.205	0.443	(A) BRAF Class 1 Melanoma
TRIM33	1p13.2	1	2.22	0	0.00	0.205	0.443	(A) BRAF Class 1 Melanoma
ZNF384	12p13.31	1	2.22	0	0.00	0.205	0.443	(A) BRAF Class 1 Melanoma
GRM3	7q21.11-q21.12	31	11.27	5	18.52	0.205	0.443	(B) BRAF Class 2 Melanoma
TP53BP1	15q15.3	18	4.42	5	7.58	0.205	0.443	(B) BRAF Class 2 Melanoma
B2M	15q21.1	21	3.17	5	5.38	0.206	0.444	(B) BRAF Class 2 Melanoma
SMARCE1	17q21.2	1	0.43	1	3.45	0.21	0.452	(B) BRAF Class 2 Melanoma
COP1	1q25.1-q25.2	5	1.09	2	3.03	0.217	0.463	(B) BRAF Class 2 Melanoma
MCL1	1q21.2	5	0.65	2	1.80	0.217	0.463	(B) BRAF Class 2 Melanoma
ID4	6p22.3	1	0.50	1	3.85	0.217	0.463	(B) BRAF Class 2 Melanoma
CDC73	1q31.2	10	1.30	3	2.70	0.218	0.464	(B) BRAF Class 2 Melanoma
CRKL	22q11.21	10	1.30	3	2.70	0.218	0.464	(B) BRAF Class 2 Melanoma
SMYD3	1q44	4	2.34	2	6.67	0.22	0.466	(B) BRAF Class 2 Melanoma
PRKCZ	1p36.33	1	1.47	1	11.11	0.221	0.468	(B) BRAF Class 2 Melanoma
UBR5	8q22.3	1	2.00	0	0.00	0.222	0.468	(A) BRAF Class 1 Melanoma
CTNNB1	3p22.1	67	5.68	13	7.43	0.223	0.469	(B) BRAF Class 2 Melanoma
DNAJB1	19p13.12	1	0.22	1	1.64	0.227	0.476	(B) BRAF Class 2 Melanoma
MDC1	6p21.33	28	6.88	6	10.53	0.227	0.476	(B) BRAF Class 2 Melanoma
SDHAF2	11q12.2	1	0.15	1	1.05	0.23	0.481	(B) BRAF Class 2 Melanoma
HIST1H3H	6p22.1	1	0.26	1	1.82	0.231	0.482	(B) BRAF Class 2 Melanoma
EML4	2p21	4	2.15	1	10.00	0.233	0.483	(B) BRAF Class 2 Melanoma
AMER1	Xq11.2	22	4.09	5	6.58	0.233	0.483	(B) BRAF Class 2 Melanoma
FLI1	11q24.3	4	2.17	1	10.00	0.235	0.485	(B) BRAF Class 2 Melanoma
CIC	19q13.2	40	5.56	8	7.84	0.235	0.485	(B) BRAF Class 2 Melanoma
BRD4	19p13.12	39	5.15	8	7.27	0.236	0.485	(B) BRAF Class 2 Melanoma
ARID5B	10q21.2	22	4.97	5	7.94	0.236	0.485	(B) BRAF Class 2 Melanoma
RAD52	12p13.33	1	0.15	1	1.04	0.24	0.49	(B) BRAF Class 2 Melanoma
TSHR	14q31.1	16	2.21	4	3.81	0.24	0.49	(B) BRAF Class 2 Melanoma
DNMT3B	20q11.21	11	2.70	3	5.26	0.241	0.491	(B) BRAF Class 2 Melanoma
PRKDC	8q11.21	54	10.57	9	14.29	0.242	0.491	(B) BRAF Class 2 Melanoma
NCKAP5	2q21.2	2	6.25	1	33.33	0.242	0.491	(B) BRAF Class 2 Melanoma
TSHZ2	20q13.2	2	6.25	1	33.33	0.242	0.491	(B) BRAF Class 2 Melanoma
RAC1	7p22.1	35	4.27	7	6.14	0.244	0.493	(B) BRAF Class 2 Melanoma
KLF4	9q31.2	17	2.64	4	4.49	0.244	0.493	(B) BRAF Class 2 Melanoma
TAF1	Xq13.1	10	4.24	2	9.52	0.256	0.514	(B) BRAF Class 2 Melanoma
RHEB	7q36.1	6	0.87	2	2.08	0.256	0.514	(B) BRAF Class 2 Melanoma
PLK2	5q11.2	6	1.47	2	3.51	0.256	0.514	(B) BRAF Class 2 Melanoma
ANKRD11	16q24.3	28	7.14	2	3.64	0.258	0.517	(A) BRAF Class 1 Melanoma
ETS1	11q24.3	3	1.36	1	5.88	0.259	0.517	(B) BRAF Class 2 Melanoma
IKBKE	1q32.1	6	1.12	2	2.63	0.26	0.517	(B) BRAF Class 2 Melanoma
PIK3R1	5q13.1	17	2.10	4	3.48	0.26	0.517	(B) BRAF Class 2 Melanoma
PRDM1	6q21	53	6.88	10	9.01	0.261	0.517	(B) BRAF Class 2 Melanoma
CASP8	2q33.1	10	1.42	0	0.00	0.265	0.525	(A) BRAF Class 1 Melanoma
ESR2	14q23.2-q23.3	1	0.93	1	5.56	0.266	0.526	(B) BRAF Class 2 Melanoma
TENT5C	1p12	17	2.21	4	3.60	0.268	0.526	(B) BRAF Class 2 Melanoma
TOPBP1	3q22.1	7	3.41	2	7.69	0.268	0.526	(B) BRAF Class 2 Melanoma
TET1	10q21.3	31	5.03	6	7.23	0.268	0.526	(B) BRAF Class 2 Melanoma
BRIP1	17q23.2	29	3.77	6	5.41	0.272	0.531	(B) BRAF Class 2 Melanoma
MITF	3p13	35	4.55	3	2.70	0.272	0.531	(A) BRAF Class 1 Melanoma
PRF1	10q22.1	10	3.89	0	0.00	0.273	0.532	(A) BRAF Class 1 Melanoma
DOCK8	9p24.3	13	6.50	3	11.54	0.274	0.532	(B) BRAF Class 2 Melanoma
TTYH1	19q13.42	2	3.70	1	16.67	0.275	0.532	(B) BRAF Class 2 Melanoma
EPAS1	2p21	1	0.58	1	3.33	0.277	0.532	(B) BRAF Class 2 Melanoma
ERF	19q13.2	1	0.58	1	3.33	0.277	0.532	(B) BRAF Class 2 Melanoma
PTP4A1	6q12	1	0.58	1	3.33	0.277	0.532	(B) BRAF Class 2 Melanoma
SESN3	11q21	1	0.58	1	3.33	0.277	0.532	(B) BRAF Class 2 Melanoma
XRCC6	22q13.2	7	3.50	2	7.69	0.277	0.532	(B) BRAF Class 2 Melanoma
RB1	13q14.2	32	2.89	6	4.08	0.28	0.536	(B) BRAF Class 2 Melanoma
NCOA3	20q13.12	19	4.27	1	1.64	0.281	0.536	(A) BRAF Class 1 Melanoma
KMT2C	7q36.1	76	14.96	13	18.31	0.282	0.537	(B) BRAF Class 2 Melanoma
NTRK2	9q21.33	18	2.24	4	3.51	0.287	0.547	(B) BRAF Class 2 Melanoma
VHL	3p25.3	7	0.65	2	1.39	0.289	0.548	(B) BRAF Class 2 Melanoma
DCUN1D1	3q26.33	1	0.25	1	1.32	0.29	0.548	(B) BRAF Class 2 Melanoma
FOXO1	13q14.11	7	1.52	2	3.23	0.291	0.548	(B) BRAF Class 2 Melanoma
CHEK2	22q12.1	18	2.24	1	0.87	0.291	0.548	(A) BRAF Class 1 Melanoma
SDHA	5p15.33	27	3.64	2	1.94	0.291	0.548	(A) BRAF Class 1 Melanoma
NFKBIA	14q13.2	9	1.19	0	0.00	0.295	0.553	(A) BRAF Class 1 Melanoma
ZNRF3	22q12.1	9	3.57	0	0.00	0.295	0.553	(A) BRAF Class 1 Melanoma
MED12	Xq13.1	37	4.91	8	6.45	0.295	0.553	(B) BRAF Class 2 Melanoma
PAX5	9p13.2	12	1.54	3	2.63	0.298	0.557	(B) BRAF Class 2 Melanoma
RIT1	1q22	7	1.09	2	2.25	0.3	0.559	(B) BRAF Class 2 Melanoma
SMARCA4	19p13.2	50	6.21	9	7.89	0.303	0.562	(B) BRAF Class 2 Melanoma
MAPK1	22q11.22	7	0.94	2	1.92	0.303	0.562	(B) BRAF Class 2 Melanoma
SBDS	7q11.21	2	0.71	1	2.78	0.303	0.562	(B) BRAF Class 2 Melanoma
CSDE1	1p13.2	2	0.64	1	2.50	0.304	0.562	(B) BRAF Class 2 Melanoma
LATS1	6q25.1	7	1.72	2	3.51	0.305	0.562	(B) BRAF Class 2 Melanoma
INHA	2q35	7	1.79	2	3.64	0.306	0.562	(B) BRAF Class 2 Melanoma
KAT6B	10q22.2	16	7.05	3	11.54	0.308	0.562	(B) BRAF Class 2 Melanoma
FANCD2	3p25.3	23	4.47	4	6.67	0.308	0.562	(B) BRAF Class 2 Melanoma
FAAP20	1p36.33	2	1.00	1	3.85	0.308	0.562	(B) BRAF Class 2 Melanoma
UROD	1p34.1	2	1.00	1	3.85	0.308	0.562	(B) BRAF Class 2 Melanoma
KIF1B	1p36.22	14	7.00	3	11.54	0.308	0.562	(B) BRAF Class 2 Melanoma
LATS2	13q12.11	13	3.18	3	5.26	0.31	0.563	(B) BRAF Class 2 Melanoma
PMS2	7p22.1	19	2.40	4	3.60	0.311	0.564	(B) BRAF Class 2 Melanoma
STAT6	12q13.3	9	2.92	0	0.00	0.312	0.565	(A) BRAF Class 1 Melanoma
CDK6	7q21.2	7	0.87	2	1.74	0.313	0.565	(B) BRAF Class 2 Melanoma
DMD	Xp21.2-p21.1	2	2.94	1	11.11	0.315	0.568	(B) BRAF Class 2 Melanoma
FLCN	17p11.2	7	0.92	2	1.82	0.315	0.568	(B) BRAF Class 2 Melanoma
GATA2	3q21.3	13	1.75	3	2.86	0.316	0.568	(B) BRAF Class 2 Melanoma
LMO1	11p15.4	7	0.98	2	1.92	0.32	0.574	(B) BRAF Class 2 Melanoma
EIF1AX	Xp22.12	7	1.53	2	2.99	0.321	0.575	(B) BRAF Class 2 Melanoma
RBBP8	18q11.2	8	4.00	2	7.69	0.323	0.575	(B) BRAF Class 2 Melanoma
MAX	14q23.3	2	0.31	1	1.11	0.323	0.575	(B) BRAF Class 2 Melanoma
PIK3CB	3q22.3	14	2.64	3	4.23	0.325	0.575	(B) BRAF Class 2 Melanoma
TGFBR1	9q22.33	2	0.49	1	1.75	0.326	0.575	(B) BRAF Class 2 Melanoma
HIST1H3A	6p22.2	2	0.51	1	1.82	0.326	0.575	(B) BRAF Class 2 Melanoma
HIST1H3F	6p22.2	2	0.51	1	1.82	0.326	0.575	(B) BRAF Class 2 Melanoma
HIST1H3J	6p22.1	2	0.51	1	1.82	0.326	0.575	(B) BRAF Class 2 Melanoma
CCND3	6p21.1	2	0.25	1	0.88	0.327	0.575	(B) BRAF Class 2 Melanoma
SDHD	11q23.1	2	0.26	1	0.92	0.33	0.58	(B) BRAF Class 2 Melanoma
AKT1	14q32.33	16	1.36	1	0.57	0.334	0.586	(A) BRAF Class 1 Melanoma
GLI2	2q14.2	32	11.19	6	14.63	0.335	0.587	(B) BRAF Class 2 Melanoma
IGF1	12q23.2	2	0.43	1	1.45	0.342	0.598	(B) BRAF Class 2 Melanoma
U2AF1	21q22.3	8	1.00	0	0.00	0.343	0.598	(A) BRAF Class 1 Melanoma
XPC	3p25.1	9	3.19	0	0.00	0.344	0.599	(A) BRAF Class 1 Melanoma
INSR	19p13.2	20	4.23	4	5.97	0.346	0.602	(B) BRAF Class 2 Melanoma
RHOA	3p21.31	8	1.18	2	2.13	0.349	0.606	(B) BRAF Class 2 Melanoma
SIN3A	15q24.2	3	5.56	1	16.67	0.351	0.607	(B) BRAF Class 2 Melanoma
AKT3	1q43-q44	14	1.73	3	2.63	0.352	0.607	(B) BRAF Class 2 Melanoma
ALOX12B	17p13.1	13	2.49	3	3.80	0.353	0.607	(B) BRAF Class 2 Melanoma
MAP3K4	6q26	6	3.77	1	10.00	0.353	0.607	(B) BRAF Class 2 Melanoma
KEAP1	19p13.2	8	1.05	2	1.87	0.354	0.608	(B) BRAF Class 2 Melanoma
RBM10	Xp11.3	16	2.27	1	1.00	0.355	0.608	(A) BRAF Class 1 Melanoma
PARP1	1q42.12	8	1.61	2	2.86	0.356	0.608	(B) BRAF Class 2 Melanoma
MYB	6q23.3	9	1.75	0	0.00	0.361	0.616	(A) BRAF Class 1 Melanoma
CCNE1	19q12	8	0.99	2	1.74	0.361	0.616	(B) BRAF Class 2 Melanoma
CRLF2	Xp22.33 and Yp11.2	14	1.88	3	2.80	0.363	0.617	(B) BRAF Class 2 Melanoma
ESR1	6q25.1-q25.2	18	2.09	4	2.88	0.365	0.619	(B) BRAF Class 2 Melanoma
POLH	6p21.1	3	1.38	1	3.85	0.366	0.62	(B) BRAF Class 2 Melanoma
ERCC6	10q11.23	9	4.50	2	7.69	0.368	0.623	(B) BRAF Class 2 Melanoma
KLLN	10q23.31	8	4.00	0	0.00	0.37	0.625	(A) BRAF Class 1 Melanoma
SMC3	10q25.2	9	1.97	0	0.00	0.375	0.631	(A) BRAF Class 1 Melanoma
MAP3K1	5q11.2	27	3.51	5	4.50	0.378	0.631	(B) BRAF Class 2 Melanoma
POLD1	19q13.33	27	3.82	5	4.90	0.379	0.631	(B) BRAF Class 2 Melanoma
PAX8	2q14.1	6	2.64	1	6.25	0.383	0.631	(B) BRAF Class 2 Melanoma
ZMYM3	Xq13.1	4	5.63	1	14.29	0.383	0.631	(B) BRAF Class 2 Melanoma
ARFRP1	20q13.33	4	1.39	1	3.45	0.384	0.631	(B) BRAF Class 2 Melanoma
KLHL6	3q27.1	10	3.40	0	0.00	0.385	0.631	(A) BRAF Class 1 Melanoma
IDH2	15q26.1	8	0.72	2	1.20	0.386	0.631	(B) BRAF Class 2 Melanoma
CARM1	19p13.2	2	1.17	1	3.33	0.386	0.631	(B) BRAF Class 2 Melanoma
CCNQ	Xq28	2	1.17	1	3.33	0.386	0.631	(B) BRAF Class 2 Melanoma
RXRA	9q34.2	2	1.17	1	3.33	0.386	0.631	(B) BRAF Class 2 Melanoma
TAP1	6p21.32	2	1.17	1	3.33	0.386	0.631	(B) BRAF Class 2 Melanoma
PTK2B	8p21.2	9	4.21	2	6.90	0.386	0.631	(B) BRAF Class 2 Melanoma
MSH6	2p16.3	28	3.47	5	4.39	0.387	0.631	(B) BRAF Class 2 Melanoma
EXT1	8q24.11	8	2.84	0	0.00	0.388	0.631	(A) BRAF Class 1 Melanoma
EXT2	11p11.2	8	2.84	0	0.00	0.388	0.631	(A) BRAF Class 1 Melanoma
SMAD2	18q21.1	7	0.91	0	0.00	0.388	0.631	(A) BRAF Class 1 Melanoma
BABAM2	2p23.2	3	1.50	1	3.85	0.389	0.631	(B) BRAF Class 2 Melanoma
DCLRE1C	10p13	3	1.50	1	3.85	0.389	0.631	(B) BRAF Class 2 Melanoma
DDB1	11q12.2	3	1.50	1	3.85	0.389	0.631	(B) BRAF Class 2 Melanoma
HMBS	11q23.3	3	1.50	1	3.85	0.389	0.631	(B) BRAF Class 2 Melanoma
MUS81	11q13.1	3	1.50	1	3.85	0.389	0.631	(B) BRAF Class 2 Melanoma
BUB1B	15q15.1	10	3.55	2	5.71	0.39	0.632	(B) BRAF Class 2 Melanoma
FGF7	15q21.2	4	1.88	1	4.55	0.391	0.632	(B) BRAF Class 2 Melanoma
PRKN	6q26	34	4.50	6	5.50	0.392	0.633	(B) BRAF Class 2 Melanoma
MDM4	1q32.1	15	1.86	3	2.61	0.395	0.636	(B) BRAF Class 2 Melanoma
NUP214	9q34.13	1	2.00	1	0.57	0.396	0.636	(A) BRAF Class 1 Melanoma
MSH2	2p21-p16.3	15	1.92	3	2.68	0.396	0.636	(B) BRAF Class 2 Melanoma
BAP1	3p21.1	28	3.48	5	4.35	0.397	0.636	(B) BRAF Class 2 Melanoma
HSD3B1	1p12	5	2.09	1	4.76	0.4	0.639	(B) BRAF Class 2 Melanoma
FBXW7	4q31.3	30	2.67	5	3.31	0.4	0.639	(B) BRAF Class 2 Melanoma
STAT5A	17q21.2	3	0.73	1	1.79	0.403	0.642	(B) BRAF Class 2 Melanoma
GSK3B	3q13.33	9	1.68	2	2.63	0.405	0.644	(B) BRAF Class 2 Melanoma
ERRFI1	1p36.23	9	1.77	2	2.78	0.405	0.644	(B) BRAF Class 2 Melanoma
MYOD1	11p15.1	3	0.70	1	1.67	0.409	0.646	(B) BRAF Class 2 Melanoma
EIF4E	4q23	3	0.77	1	1.82	0.41	0.646	(B) BRAF Class 2 Melanoma
HIST1H3D	6p22.2	3	0.77	1	1.82	0.41	0.646	(B) BRAF Class 2 Melanoma
TMEM127	2q11.2	3	0.49	1	1.16	0.41	0.646	(B) BRAF Class 2 Melanoma
CALR	19p13.13	7	1.07	0	0.00	0.411	0.646	(A) BRAF Class 1 Melanoma
EED	11q14.2	7	1.40	0	0.00	0.412	0.646	(A) BRAF Class 1 Melanoma
RAD54B	8q22.1	10	5.00	2	7.69	0.412	0.646	(B) BRAF Class 2 Melanoma
ELOC	8q21.11	3	0.49	1	1.15	0.414	0.648	(B) BRAF Class 2 Melanoma
CDKN1A	6p21.2	3	0.40	1	0.92	0.417	0.653	(B) BRAF Class 2 Melanoma
HABP2	10q25.3	7	3.50	0	0.00	0.42	0.653	(A) BRAF Class 1 Melanoma
PNKP	19q13.33	7	3.50	0	0.00	0.42	0.653	(A) BRAF Class 1 Melanoma
TRIM37	17q22	7	3.50	0	0.00	0.42	0.653	(A) BRAF Class 1 Melanoma
PPM1D	17q23.2	14	2.30	1	1.15	0.422	0.656	(A) BRAF Class 1 Melanoma
RUNX1	21q22.12	22	2.86	4	3.57	0.425	0.658	(B) BRAF Class 2 Melanoma
STAT3	17q21.2	14	1.77	1	0.89	0.425	0.658	(A) BRAF Class 1 Melanoma
RAD50	5q31.1	23	3.09	4	3.85	0.427	0.66	(B) BRAF Class 2 Melanoma
EZH2	7q36.1	31	3.01	5	3.60	0.429	0.661	(B) BRAF Class 2 Melanoma
ACVR1B	12q13.13	5	1.82	1	3.70	0.433	0.666	(B) BRAF Class 2 Melanoma
BCL6	3q27.3	16	2.08	3	2.70	0.436	0.67	(B) BRAF Class 2 Melanoma
PPP6C	9q33.3	36	8.28	4	6.56	0.438	0.671	(A) BRAF Class 1 Melanoma
FGF19	11q13.3	10	1.75	2	2.53	0.439	0.672	(B) BRAF Class 2 Melanoma
EMSY	11q13.5	5	1.73	1	3.45	0.439	0.672	(B) BRAF Class 2 Melanoma
ACVR1	2q24.1	10	1.59	2	2.30	0.441	0.672	(B) BRAF Class 2 Melanoma
DDR2	1q23.3	20	2.28	4	2.80	0.441	0.672	(B) BRAF Class 2 Melanoma
PTCH2	1p34.1	3	2.91	1	6.25	0.443	0.672	(B) BRAF Class 2 Melanoma
FANCE	6p21.31	7	1.36	0	0.00	0.444	0.672	(A) BRAF Class 1 Melanoma
PTEN	10q23.31	172	14.58	24	15.29	0.445	0.672	(B) BRAF Class 2 Melanoma
ELF3	1q32.1	5	2.42	0	0.00	0.445	0.672	(A) BRAF Class 1 Melanoma
TFE3	Xp11.23	5	1.22	1	2.38	0.446	0.672	(B) BRAF Class 2 Melanoma
SRSF2	17q25.1	10	1.45	2	2.06	0.446	0.672	(B) BRAF Class 2 Melanoma
TSC2	16p13.3	30	3.71	5	4.35	0.447	0.672	(B) BRAF Class 2 Melanoma
NUP93	16q13	6	1.17	0	0.00	0.447	0.672	(A) BRAF Class 1 Melanoma
CHD2	15q26.1	14	5.30	2	7.41	0.449	0.674	(B) BRAF Class 2 Melanoma
FUS	16p11.2	7	2.27	0	0.00	0.45	0.674	(A) BRAF Class 1 Melanoma
TRAF3	14q32.32	4	1.54	1	3.03	0.452	0.676	(B) BRAF Class 2 Melanoma
GNAS	20q13.32	14	1.24	1	0.66	0.454	0.678	(A) BRAF Class 1 Melanoma
CUL3	2q36.2	6	1.13	0	0.00	0.455	0.678	(A) BRAF Class 1 Melanoma
RTEL1	20q13.33	8	4.68	2	6.67	0.456	0.679	(B) BRAF Class 2 Melanoma
SH2B3	12q24.12	20	2.68	2	1.85	0.458	0.679	(A) BRAF Class 1 Melanoma
PRKAR1A	17q24.2	10	1.30	2	1.80	0.459	0.679	(B) BRAF Class 2 Melanoma
EXO1	1q43	4	2.00	1	3.85	0.46	0.679	(B) BRAF Class 2 Melanoma
HFE	6p22.2	4	2.00	1	3.85	0.46	0.679	(B) BRAF Class 2 Melanoma
SLC25A13	7q21.3	4	2.00	1	3.85	0.46	0.679	(B) BRAF Class 2 Melanoma
TRAF2	9q34.3	6	1.47	0	0.00	0.461	0.679	(A) BRAF Class 1 Melanoma
GLI3	7p14.1	6	8.82	0	0.00	0.462	0.679	(A) BRAF Class 1 Melanoma
PALB2	16p12.2	24	2.98	4	3.51	0.466	0.684	(B) BRAF Class 2 Melanoma
NPM1	5q35.1	6	0.56	0	0.00	0.47	0.689	(A) BRAF Class 1 Melanoma
ABL2	1q25.2	6	2.19	1	3.85	0.473	0.691	(B) BRAF Class 2 Melanoma
EPCAM	2p21	4	0.61	1	1.12	0.474	0.691	(B) BRAF Class 2 Melanoma
CYLD	16q12.1	18	2.71	3	3.30	0.474	0.691	(B) BRAF Class 2 Melanoma
DIS3L2	2q37.1	6	2.70	0	0.00	0.475	0.691	(A) BRAF Class 1 Melanoma
ELANE	19p13.3	6	2.70	0	0.00	0.475	0.691	(A) BRAF Class 1 Melanoma
NEIL3	4q34.3	6	3.00	0	0.00	0.476	0.692	(A) BRAF Class 1 Melanoma
GPS2	17p13.1	4	1.00	1	1.82	0.477	0.692	(B) BRAF Class 2 Melanoma
MSI1	12q24.31	3	1.75	1	3.33	0.479	0.692	(B) BRAF Class 2 Melanoma
ERBB3	12q13.2	21	2.60	4	3.01	0.48	0.692	(B) BRAF Class 2 Melanoma
CYSLTR2	13q14.2	3	1.44	1	2.70	0.481	0.692	(B) BRAF Class 2 Melanoma
ID3	1p36.12	4	0.57	1	1.02	0.482	0.692	(B) BRAF Class 2 Melanoma
EGFL7	9q34.3	4	0.98	1	1.75	0.482	0.692	(B) BRAF Class 2 Melanoma
IL10	1q32.1	4	0.98	1	1.75	0.482	0.692	(B) BRAF Class 2 Melanoma
HIST1H3E	6p22.2	4	1.02	1	1.82	0.483	0.692	(B) BRAF Class 2 Melanoma
NKX3-1	8p21.2	4	0.68	1	1.20	0.484	0.692	(B) BRAF Class 2 Melanoma
KNSTRN	15q15.1	15	6.20	3	7.50	0.484	0.692	(B) BRAF Class 2 Melanoma
CDKN1B	12p13.1	4	0.50	1	0.88	0.485	0.693	(B) BRAF Class 2 Melanoma
SDHC	1q23.3	4	0.53	1	0.93	0.487	0.694	(B) BRAF Class 2 Melanoma
H3F3A	1q42.12	4	0.50	1	0.88	0.489	0.695	(B) BRAF Class 2 Melanoma
FGF23	12p13.32	6	2.08	1	3.45	0.491	0.697	(B) BRAF Class 2 Melanoma
CD79B	17q23.3	4	0.52	1	0.90	0.492	0.697	(B) BRAF Class 2 Melanoma
CDKN2C	1p32.3	4	0.52	1	0.90	0.492	0.697	(B) BRAF Class 2 Melanoma
CCN6	6q21	6	2.16	1	3.57	0.493	0.697	(B) BRAF Class 2 Melanoma
DOT1L	19p13.3	25	4.66	4	5.26	0.495	0.698	(B) BRAF Class 2 Melanoma
HLA-A	6p22.1	5	1.12	0	0.00	0.495	0.698	(A) BRAF Class 1 Melanoma
FANCG	9p13.3	5	0.95	1	1.56	0.499	0.702	(B) BRAF Class 2 Melanoma
ZNF703	8p11.23	7	2.42	0	0.00	0.509	0.715	(A) BRAF Class 1 Melanoma
CEBPA	19q13.11	5	0.66	0	0.00	0.511	0.716	(A) BRAF Class 1 Melanoma
POLE	12q24.33	61	8.05	8	7.48	0.511	0.716	(A) BRAF Class 1 Melanoma
BCL2L1	20q11.21	5	0.66	0	0.00	0.513	0.718	(A) BRAF Class 1 Melanoma
CDK4	12q14.1	28	3.48	4	3.01	0.516	0.72	(A) BRAF Class 1 Melanoma
MAPK3	16p11.2	5	1.28	0	0.00	0.517	0.72	(A) BRAF Class 1 Melanoma
XIAP	Xq25	5	1.23	0	0.00	0.518	0.72	(A) BRAF Class 1 Melanoma
TRAF7	16p13.3	12	1.86	1	1.12	0.518	0.72	(A) BRAF Class 1 Melanoma
TDG	12q23.3	5	2.50	1	3.85	0.524	0.727	(B) BRAF Class 2 Melanoma
CSF1R	5q32	28	3.05	3	2.56	0.529	0.731	(A) BRAF Class 1 Melanoma
ERCC2	19q13.32	26	3.29	4	3.54	0.529	0.731	(B) BRAF Class 2 Melanoma
SLITRK6	13q31.1	6	8.11	0	0.00	0.529	0.731	(A) BRAF Class 1 Melanoma
IKZF3	17q12-q21.1	5	4.13	1	6.25	0.532	0.734	(B) BRAF Class 2 Melanoma
FANCM	14q21.2	12	4.43	2	5.26	0.533	0.734	(B) BRAF Class 2 Melanoma
PDCD1	2q37.3	5	1.14	1	1.69	0.534	0.735	(B) BRAF Class 2 Melanoma
FGF4	11q13.3	12	2.23	2	2.63	0.535	0.735	(B) BRAF Class 2 Melanoma
HIST1H1C	6p22.2	5	1.18	1	1.72	0.539	0.737	(B) BRAF Class 2 Melanoma
FAH	15q25.1	5	2.50	0	0.00	0.54	0.737	(A) BRAF Class 1 Melanoma
MBD4	3q21.3	5	2.50	0	0.00	0.54	0.737	(A) BRAF Class 1 Melanoma
NAV3	12q21.2	6	11.11	1	16.67	0.541	0.738	(B) BRAF Class 2 Melanoma
FANCC	9q22.32	11	1.43	1	0.90	0.541	0.738	(A) BRAF Class 1 Melanoma
UIMC1	5q35.2	5	2.48	0	0.00	0.543	0.738	(A) BRAF Class 1 Melanoma
MYC	8q24.21	23	2.85	4	3.01	0.545	0.738	(B) BRAF Class 2 Melanoma
JUN	1p32.1	5	1.00	1	1.43	0.545	0.738	(B) BRAF Class 2 Melanoma
RAD51D	17q12	5	0.67	1	0.95	0.546	0.738	(B) BRAF Class 2 Melanoma
VTCN1	1p13.1-p12	5	1.23	1	1.75	0.547	0.738	(B) BRAF Class 2 Melanoma
PIK3R2	19p13.11	11	2.09	1	1.33	0.547	0.738	(A) BRAF Class 1 Melanoma
RAB35	12q24.23	5	1.28	1	1.82	0.547	0.738	(B) BRAF Class 2 Melanoma
RANBP2	2q13	20	8.77	2	10.00	0.549	0.739	(B) BRAF Class 2 Melanoma
GATA1	Xp11.23	5	0.94	1	1.33	0.55	0.739	(B) BRAF Class 2 Melanoma
PAK1	11q13.5-q14.1	5	1.13	1	1.59	0.552	0.74	(B) BRAF Class 2 Melanoma
SOCS1	16p13.13	5	0.65	1	0.90	0.555	0.744	(B) BRAF Class 2 Melanoma
DROSHA	5p13.3	9	4.66	1	3.03	0.556	0.745	(A) BRAF Class 1 Melanoma
BCORL1	Xq26.1	28	5.32	3	4.69	0.56	0.748	(A) BRAF Class 1 Melanoma
CD274	9p24.1	5	0.66	1	0.90	0.561	0.748	(B) BRAF Class 2 Melanoma
FGF3	11q13.3	13	2.27	2	2.53	0.561	0.748	(B) BRAF Class 2 Melanoma
NSD2	4p16.3	12	2.81	2	3.13	0.565	0.751	(B) BRAF Class 2 Melanoma
GNAQ	9q21.2	12	1.07	2	1.18	0.567	0.753	(B) BRAF Class 2 Melanoma
RELA	11q13.1	6	2.37	1	3.13	0.57	0.754	(B) BRAF Class 2 Melanoma
RPA1	17p13.3	5	1.97	1	2.63	0.57	0.754	(B) BRAF Class 2 Melanoma
TLR4	9q33.1	7	7.07	0	0.00	0.571	0.754	(A) BRAF Class 1 Melanoma
CCND1	11q13.3	9	1.13	1	0.75	0.571	0.754	(A) BRAF Class 1 Melanoma
FAS	10q23.31	5	1.03	0	0.00	0.573	0.754	(A) BRAF Class 1 Melanoma
MTAP	9p21.3	19	8.88	2	7.41	0.574	0.754	(A) BRAF Class 1 Melanoma
ETV4	17q21.31	5	1.03	0	0.00	0.574	0.754	(A) BRAF Class 1 Melanoma
CTCF	16q22.1	13	1.81	2	1.96	0.575	0.754	(B) BRAF Class 2 Melanoma
INSRR	1q23.1	4	0.34	0	0.00	0.575	0.754	(A) BRAF Class 1 Melanoma
IRS2	13q34	28	5.20	4	5.26	0.576	0.754	(B) BRAF Class 2 Melanoma
BRD3	9q34.2	7	3.02	1	3.85	0.578	0.754	(B) BRAF Class 2 Melanoma
FAN1	15q13.3	6	3.00	1	3.85	0.58	0.754	(B) BRAF Class 2 Melanoma
HELQ	4q21.23	6	3.00	1	3.85	0.58	0.754	(B) BRAF Class 2 Melanoma
SOX2	3q26.33	4	0.52	0	0.00	0.58	0.754	(A) BRAF Class 1 Melanoma
STAG2	Xq25	23	2.99	3	2.70	0.58	0.754	(A) BRAF Class 1 Melanoma
NKX2-1	14q13.3	10	1.30	1	0.89	0.583	0.757	(A) BRAF Class 1 Melanoma
QKI	6q26	5	1.08	0	0.00	0.586	0.759	(A) BRAF Class 1 Melanoma
ARHGAP35	19q13.32	14	5.86	2	6.25	0.586	0.759	(B) BRAF Class 2 Melanoma
PIK3R3	1p34.1	4	0.98	0	0.00	0.591	0.764	(A) BRAF Class 1 Melanoma
CCND2	12p13.32	10	1.25	1	0.88	0.592	0.765	(A) BRAF Class 1 Melanoma
FOXA1	14q21.1	17	2.61	2	2.25	0.595	0.766	(A) BRAF Class 1 Melanoma
TGFBR2	3p24.1	10	1.86	1	1.32	0.596	0.767	(A) BRAF Class 1 Melanoma
STAG1	3q22.3	6	2.80	0	0.00	0.597	0.767	(A) BRAF Class 1 Melanoma
STK19	6p21.33	8	4.68	1	3.33	0.6	0.769	(A) BRAF Class 1 Melanoma
MYBL1	8q13.1	4	1.32	0	0.00	0.6	0.769	(A) BRAF Class 1 Melanoma
DPYD	1p21.3	4	3.81	0	0.00	0.602	0.77	(A) BRAF Class 1 Melanoma
YES1	18p11.32	6	1.47	1	1.75	0.603	0.77	(B) BRAF Class 2 Melanoma
BCR	22q11.23	10	3.92	1	4.55	0.605	0.771	(B) BRAF Class 2 Melanoma
MAP3K9	14q24.2	4	6.45	0	0.00	0.608	0.775	(A) BRAF Class 1 Melanoma
SHOC2	10q25.2	3	1.75	0	0.00	0.614	0.781	(A) BRAF Class 1 Melanoma
TOP2A	17q21.2	9	3.41	1	3.85	0.615	0.782	(B) BRAF Class 2 Melanoma
SMAD4	18q21.2	10	0.89	1	0.66	0.619	0.786	(A) BRAF Class 1 Melanoma
PAK3	Xq23	9	3.23	1	3.57	0.621	0.787	(B) BRAF Class 2 Melanoma
DUSP4	8p12	5	2.42	1	2.78	0.622	0.787	(B) BRAF Class 2 Melanoma
DDB2	11p11.2	4	1.42	0	0.00	0.625	0.789	(A) BRAF Class 1 Melanoma
GATA4	8p23.1	11	2.34	1	1.79	0.63	0.794	(A) BRAF Class 1 Melanoma
PIK3CD	1p36.22	7	1.62	1	1.75	0.632	0.796	(B) BRAF Class 2 Melanoma
MALT1	18q21.32	7	1.67	1	1.79	0.636	0.801	(B) BRAF Class 2 Melanoma
FANCB	Xp22.2	8	3.65	1	3.85	0.642	0.806	(B) BRAF Class 2 Melanoma
BIRC3	11q22.2	7	1.67	1	1.75	0.642	0.806	(B) BRAF Class 2 Melanoma
FYN	6q21	9	2.08	1	1.64	0.644	0.807	(A) BRAF Class 1 Melanoma
TOP1	20q12	9	1.62	1	1.28	0.647	0.809	(A) BRAF Class 1 Melanoma
SUZ12	17q11.2	9	1.31	1	1.04	0.648	0.809	(A) BRAF Class 1 Melanoma
CLDN18	3q22.3	4	7.41	0	0.00	0.649	0.809	(A) BRAF Class 1 Melanoma
CD276	15q24.1	7	1.72	1	1.75	0.653	0.81	(B) BRAF Class 2 Melanoma
INPP4A	2q11.2	7	1.72	1	1.75	0.653	0.81	(B) BRAF Class 2 Melanoma
IRS1	2q36.3	7	1.72	1	1.75	0.653	0.81	(B) BRAF Class 2 Melanoma
CTLA4	2q33.2	7	1.18	1	1.20	0.653	0.81	(B) BRAF Class 2 Melanoma
HIST1H3C	6p22.2	7	1.17	1	1.19	0.654	0.81	(B) BRAF Class 2 Melanoma
YAP1	11q22.1	7	1.12	1	1.12	0.657	0.812	(B) BRAF Class 2 Melanoma
SMARCD1	12q13.12	3	0.65	0	0.00	0.658	0.812	(A) BRAF Class 1 Melanoma
RAD54L	1p34.1	3	0.64	0	0.00	0.66	0.814	(A) BRAF Class 1 Melanoma
MT-ND5	-	3	0.25	0	0.00	0.66	0.814	(A) BRAF Class 1 Melanoma
WRN	8p12	16	5.03	2	4.88	0.661	0.814	(A) BRAF Class 1 Melanoma
CBFB	16q22.1	3	0.42	0	0.00	0.67	0.823	(A) BRAF Class 1 Melanoma
ABRAXAS1	4q21.23	3	0.45	0	0.00	0.674	0.826	(A) BRAF Class 1 Melanoma
ETV6	12p13.2	14	1.83	2	1.82	0.674	0.826	(A) BRAF Class 1 Melanoma
BCL2L11	2q13	3	0.73	0	0.00	0.675	0.826	(A) BRAF Class 1 Melanoma
LMO2	11p13	3	1.19	0	0.00	0.676	0.826	(A) BRAF Class 1 Melanoma
FAAP100	17q25.3	9	4.50	1	3.85	0.677	0.826	(A) BRAF Class 1 Melanoma
KCNQ1	11p15.5-p15.4	9	4.50	1	3.85	0.677	0.826	(A) BRAF Class 1 Melanoma
IKZF2	2q34	4	5.63	0	0.00	0.681	0.829	(A) BRAF Class 1 Melanoma
DKC1	Xq28	3	1.50	0	0.00	0.683	0.83	(A) BRAF Class 1 Melanoma
GBA	1q22	3	1.50	0	0.00	0.692	0.838	(A) BRAF Class 1 Melanoma
NEIL1	15q24.2	3	1.50	0	0.00	0.692	0.838	(A) BRAF Class 1 Melanoma
SERPINA1	14q32.13	3	1.50	0	0.00	0.692	0.838	(A) BRAF Class 1 Melanoma
XRCC5	2q35	3	1.49	0	0.00	0.694	0.839	(A) BRAF Class 1 Melanoma
RAD51C	17q22	8	1.07	1	0.95	0.694	0.839	(A) BRAF Class 1 Melanoma
USP8	15q21.2	3	1.48	0	0.00	0.695	0.839	(A) BRAF Class 1 Melanoma
SF1	11q13.1	3	3.16	0	0.00	0.697	0.84	(A) BRAF Class 1 Melanoma
IGF2R	6q25.3	3	2.34	0	0.00	0.7	0.841	(A) BRAF Class 1 Melanoma
JAZF1	7p15.2-p15.1	3	1.18	0	0.00	0.7	0.841	(A) BRAF Class 1 Melanoma
PAX7	1p36.13	5	2.25	0	0.00	0.704	0.844	(A) BRAF Class 1 Melanoma
SH2D1A	Xq25	8	1.30	1	1.20	0.708	0.848	(A) BRAF Class 1 Melanoma
XRCC1	19q13.31	3	1.38	0	0.00	0.711	0.851	(A) BRAF Class 1 Melanoma
AGO2	8q24.3	6	3.51	1	3.33	0.719	0.854	(A) BRAF Class 1 Melanoma
PRDM14	8q13.3	6	3.51	1	3.33	0.719	0.854	(A) BRAF Class 1 Melanoma
SRC	20q11.23	8	0.86	1	0.83	0.721	0.854	(A) BRAF Class 1 Melanoma
RHOH	4p14	3	1.32	0	0.00	0.721	0.854	(A) BRAF Class 1 Melanoma
NUF2	1q23.3	2	1.17	0	0.00	0.723	0.854	(A) BRAF Class 1 Melanoma
RAC2	22q13.1	2	1.17	0	0.00	0.723	0.854	(A) BRAF Class 1 Melanoma
SESN1	6q21	2	1.17	0	0.00	0.723	0.854	(A) BRAF Class 1 Melanoma
BORCS8-MEF2B	19p13.11	7	0.59	1	0.57	0.723	0.854	(A) BRAF Class 1 Melanoma
BRINP3	1q31.1	5	10.64	0	0.00	0.724	0.854	(A) BRAF Class 1 Melanoma
GEN1	2p24.2	3	0.74	0	0.00	0.725	0.854	(A) BRAF Class 1 Melanoma
ROBO1	3p12.3	3	5.56	0	0.00	0.725	0.854	(A) BRAF Class 1 Melanoma
EZH1	17q21.2	2	0.97	0	0.00	0.725	0.854	(A) BRAF Class 1 Melanoma
PML	15q24.1	9	3.88	1	3.85	0.734	0.862	(A) BRAF Class 1 Melanoma
VEGFA	6p21.1	7	1.00	1	1.00	0.735	0.862	(A) BRAF Class 1 Melanoma
RAD51B	14q24.1	7	1.38	1	1.37	0.735	0.862	(A) BRAF Class 1 Melanoma
BABAM1	19p13.11	2	0.57	0	0.00	0.745	0.872	(A) BRAF Class 1 Melanoma
PNRC1	6q15	2	0.39	0	0.00	0.752	0.88	(A) BRAF Class 1 Melanoma
XRCC3	14q32.33	2	0.79	0	0.00	0.756	0.884	(A) BRAF Class 1 Melanoma
HDAC9	7p21.1	3	9.38	0	0.00	0.758	0.884	(A) BRAF Class 1 Melanoma
H19	11p15.5	2	0.17	0	0.00	0.758	0.884	(A) BRAF Class 1 Melanoma
BBC3	19q13.32	2	0.49	0	0.00	0.769	0.894	(A) BRAF Class 1 Melanoma
STK40	1p34.3	2	0.49	0	0.00	0.769	0.894	(A) BRAF Class 1 Melanoma
HSP90AA1	14q32.31	3	1.26	0	0.00	0.775	0.897	(A) BRAF Class 1 Melanoma
CDK5	7q36.1	2	2.94	0	0.00	0.779	0.897	(A) BRAF Class 1 Melanoma
FKBP9	7p14.3	2	2.94	0	0.00	0.779	0.897	(A) BRAF Class 1 Melanoma
GSTM5	1p13.3	2	2.94	0	0.00	0.779	0.897	(A) BRAF Class 1 Melanoma
RBL2	16q12.2	2	2.94	0	0.00	0.779	0.897	(A) BRAF Class 1 Melanoma
ANKRD26	10p12.1	4	2.52	0	0.00	0.782	0.897	(A) BRAF Class 1 Melanoma
DMC1	22q13.1	2	1.00	0	0.00	0.783	0.897	(A) BRAF Class 1 Melanoma
NR0B1	Xp21.2	2	1.00	0	0.00	0.783	0.897	(A) BRAF Class 1 Melanoma
OGG1	3p25.3	2	1.00	0	0.00	0.783	0.897	(A) BRAF Class 1 Melanoma
RHOT1	17q11.2	2	1.00	0	0.00	0.783	0.897	(A) BRAF Class 1 Melanoma
CADM2	3p12.1	3	5.00	0	0.00	0.783	0.897	(A) BRAF Class 1 Melanoma
DEPDC5	22q12.2-q12.3	3	5.00	0	0.00	0.783	0.897	(A) BRAF Class 1 Melanoma
TAL2	9q31.2	2	0.99	0	0.00	0.784	0.897	(A) BRAF Class 1 Melanoma
XPA	9q22.33	2	0.71	0	0.00	0.791	0.903	(A) BRAF Class 1 Melanoma
MYH9	22q12.3	3	3.70	0	0.00	0.805	0.918	(A) BRAF Class 1 Melanoma
CHD1	5q15-q21.1	2	3.70	0	0.00	0.808	0.918	(A) BRAF Class 1 Melanoma
SOS2	14q21.3	2	3.70	0	0.00	0.808	0.918	(A) BRAF Class 1 Melanoma
ZBTB20	3q13.31	2	3.70	0	0.00	0.808	0.918	(A) BRAF Class 1 Melanoma
EPHB6	7q34	2	2.17	0	0.00	0.813	0.922	(A) BRAF Class 1 Melanoma
LTK	15q15.1	2	1.94	0	0.00	0.816	0.922	(A) BRAF Class 1 Melanoma
PDK1	2q31.1	2	0.69	0	0.00	0.826	0.922	(A) BRAF Class 1 Melanoma
PPP2R2A	8p21.2	3	1.76	0	0.00	0.828	0.922	(A) BRAF Class 1 Melanoma
TCF7L1	2p11.2	2	2.15	0	0.00	0.831	0.922	(A) BRAF Class 1 Melanoma
DHX15	4p15.2	3	1.89	0	0.00	0.832	0.922	(A) BRAF Class 1 Melanoma
FGF1	5q31.3	3	1.89	0	0.00	0.832	0.922	(A) BRAF Class 1 Melanoma
FGF9	13q12.11	3	1.89	0	0.00	0.832	0.922	(A) BRAF Class 1 Melanoma
TSHZ3	19q12	2	6.25	0	0.00	0.834	0.922	(A) BRAF Class 1 Melanoma
PRSS8	16p11.2	2	0.86	0	0.00	0.835	0.922	(A) BRAF Class 1 Melanoma
DDX3X	Xp11.4	2	2.56	0	0.00	0.841	0.922	(A) BRAF Class 1 Melanoma
KCNIP1	5q35.1	2	3.33	0	0.00	0.851	0.922	(A) BRAF Class 1 Melanoma
CDC42	1p36.12	1	0.48	0	0.00	0.852	0.922	(A) BRAF Class 1 Melanoma
KMT5A	12q24.31	1	0.58	0	0.00	0.852	0.922	(A) BRAF Class 1 Melanoma
PRKD1	14q12	1	0.53	0	0.00	0.862	0.922	(A) BRAF Class 1 Melanoma
ABCA17P	16p13.3	1	0.08	0	0.00	0.871	0.922	(A) BRAF Class 1 Melanoma
ABR	17p13.3	1	0.08	0	0.00	0.871	0.922	(A) BRAF Class 1 Melanoma
ARHGAP4	Xq28	1	0.08	0	0.00	0.871	0.922	(A) BRAF Class 1 Melanoma
ARSB	5q14.1	1	0.08	0	0.00	0.871	0.922	(A) BRAF Class 1 Melanoma
CAMK1	3p25.3	1	0.08	0	0.00	0.871	0.922	(A) BRAF Class 1 Melanoma
CASZ1	1p36.22	1	0.08	0	0.00	0.871	0.922	(A) BRAF Class 1 Melanoma
CTDSP1	2q35	1	0.08	0	0.00	0.871	0.922	(A) BRAF Class 1 Melanoma
DDAH1	1p22.3	1	0.08	0	0.00	0.871	0.922	(A) BRAF Class 1 Melanoma
DEF8	16q24.3	1	0.08	0	0.00	0.871	0.922	(A) BRAF Class 1 Melanoma
DENND4C	9p22.1	1	0.08	0	0.00	0.871	0.922	(A) BRAF Class 1 Melanoma
DHRSX	Xp22.33 and Yp11.2	1	0.08	0	0.00	0.871	0.922	(A) BRAF Class 1 Melanoma
GALNT11	7q36.1|7q36.1	1	0.08	0	0.00	0.871	0.922	(A) BRAF Class 1 Melanoma
GRIA1	5q33.2	1	0.08	0	0.00	0.871	0.922	(A) BRAF Class 1 Melanoma
GRIK1	21q21.3	1	0.08	0	0.00	0.871	0.922	(A) BRAF Class 1 Melanoma
HECTD4	12q24.13	1	0.08	0	0.00	0.871	0.922	(A) BRAF Class 1 Melanoma
HSD17B6	12q13.3	1	0.08	0	0.00	0.871	0.922	(A) BRAF Class 1 Melanoma
LOC105374464	2p22.2	1	0.08	0	0.00	0.871	0.922	(A) BRAF Class 1 Melanoma
MYO1D	17q11.2	1	0.08	0	0.00	0.871	0.922	(A) BRAF Class 1 Melanoma
MYSM1	1p32.1	1	0.08	0	0.00	0.871	0.922	(A) BRAF Class 1 Melanoma
PADI2	1p36.13	1	0.08	0	0.00	0.871	0.922	(A) BRAF Class 1 Melanoma
PAX9	14q13.3	1	0.08	0	0.00	0.871	0.922	(A) BRAF Class 1 Melanoma
PFKFB4	3p21.31	1	0.08	0	0.00	0.871	0.922	(A) BRAF Class 1 Melanoma
PLVAP	19p13.11	1	0.08	0	0.00	0.871	0.922	(A) BRAF Class 1 Melanoma
PNPLA6	19p13.2	1	0.08	0	0.00	0.871	0.922	(A) BRAF Class 1 Melanoma
PRMT6	1p13.3	1	0.08	0	0.00	0.871	0.922	(A) BRAF Class 1 Melanoma
RAB2A	8q12.1-q12.2	1	0.08	0	0.00	0.871	0.922	(A) BRAF Class 1 Melanoma
SAE1	19q13.32	1	0.08	0	0.00	0.871	0.922	(A) BRAF Class 1 Melanoma
SCARA5	8p21.1	1	0.08	0	0.00	0.871	0.922	(A) BRAF Class 1 Melanoma
SDCCAG8	1q43-q44	1	0.08	0	0.00	0.871	0.922	(A) BRAF Class 1 Melanoma
SEMA6D	15q21.1	1	0.08	0	0.00	0.871	0.922	(A) BRAF Class 1 Melanoma
SIK3	11q23.3	1	0.08	0	0.00	0.871	0.922	(A) BRAF Class 1 Melanoma
TRAJ42	14q11.2	1	0.08	0	0.00	0.871	0.922	(A) BRAF Class 1 Melanoma
UGT1A6	2q37.1	1	0.08	0	0.00	0.871	0.922	(A) BRAF Class 1 Melanoma
ZNF423	16q12.1	1	0.08	0	0.00	0.871	0.922	(A) BRAF Class 1 Melanoma
RPS6KB1	17q23.1	2	1.26	0	0.00	0.874	0.922	(A) BRAF Class 1 Melanoma
HIST2H3D	1q21.2	1	0.26	0	0.00	0.876	0.922	(A) BRAF Class 1 Melanoma
TYRO3	15q15.1	1	1.28	0	0.00	0.876	0.922	(A) BRAF Class 1 Melanoma
HIST2H3C	1q21.2	1	0.26	0	0.00	0.877	0.922	(A) BRAF Class 1 Melanoma
PMAIP1	18q21.32	1	0.25	0	0.00	0.877	0.922	(A) BRAF Class 1 Melanoma
DDR1	6p21.33	1	1.00	0	0.00	0.877	0.922	(A) BRAF Class 1 Melanoma
PDPK1	16p13.3	1	0.23	0	0.00	0.877	0.922	(A) BRAF Class 1 Melanoma
PHLPP2	16q22.2	1	1.35	0	0.00	0.881	0.922	(A) BRAF Class 1 Melanoma
UGT1A1	2q37.1	1	0.95	0	0.00	0.882	0.922	(A) BRAF Class 1 Melanoma
CDK1	10q21.2	1	1.47	0	0.00	0.883	0.922	(A) BRAF Class 1 Melanoma
CDK9	9q34.11	1	1.47	0	0.00	0.883	0.922	(A) BRAF Class 1 Melanoma
CRTC2	1q21.3	1	1.47	0	0.00	0.883	0.922	(A) BRAF Class 1 Melanoma
PRAME	22q11.22	1	1.47	0	0.00	0.883	0.922	(A) BRAF Class 1 Melanoma
PSMD13	11p15.5	1	1.47	0	0.00	0.883	0.922	(A) BRAF Class 1 Melanoma
PTK2	8q24.3	1	1.47	0	0.00	0.883	0.922	(A) BRAF Class 1 Melanoma
RHPN2	19q13.11	1	1.47	0	0.00	0.883	0.922	(A) BRAF Class 1 Melanoma
SRP19	5q22.2	1	0.69	0	0.00	0.883	0.922	(A) BRAF Class 1 Melanoma
FGF5	4q21.21	2	1.26	0	0.00	0.885	0.922	(A) BRAF Class 1 Melanoma
ZBTB7A	19p13.3	2	1.26	0	0.00	0.885	0.922	(A) BRAF Class 1 Melanoma
ENG	9q34.11	1	0.50	0	0.00	0.885	0.922	(A) BRAF Class 1 Melanoma
FAAP24	19q13.11	1	0.50	0	0.00	0.885	0.922	(A) BRAF Class 1 Melanoma
KLF2	19p13.11	1	0.50	0	0.00	0.885	0.922	(A) BRAF Class 1 Melanoma
UBE2T	1q32.1	1	0.50	0	0.00	0.885	0.922	(A) BRAF Class 1 Melanoma
FANCF	11p14.3	1	0.19	0	0.00	0.891	0.927	(A) BRAF Class 1 Melanoma
PHF6	Xq26.2	1	0.21	0	0.00	0.897	0.93	(A) BRAF Class 1 Melanoma
ATP1B2	17p13.1	0	0.00	1	0.57	0.897	0.93	(B) BRAF Class 2 Melanoma
CDH12	5p14.3	0	0.00	1	0.57	0.897	0.93	(B) BRAF Class 2 Melanoma
KIF5B	10p11.22	2	1.09	0	0.00	0.899	0.93	(A) BRAF Class 1 Melanoma
MAP3K2	2q14.3	1	1.85	0	0.00	0.9	0.93	(A) BRAF Class 1 Melanoma
MGMT	10q26.3	1	1.85	0	0.00	0.9	0.93	(A) BRAF Class 1 Melanoma
CDH20	18q21.33	1	1.09	0	0.00	0.902	0.931	(A) BRAF Class 1 Melanoma
BTG1	12q21.33	1	0.36	0	0.00	0.906	0.934	(A) BRAF Class 1 Melanoma
FRS2	12q15	1	0.38	0	0.00	0.907	0.934	(A) BRAF Class 1 Melanoma
HDAC4	2q37.3	1	1.41	0	0.00	0.91	0.935	(A) BRAF Class 1 Melanoma
GNA13	17q24.1	1	0.34	0	0.00	0.913	0.935	(A) BRAF Class 1 Melanoma
SAMD9	7q21.2	2	3.08	0	0.00	0.913	0.935	(A) BRAF Class 1 Melanoma
APOBEC3G	22q13.1	1	3.13	0	0.00	0.914	0.935	(A) BRAF Class 1 Melanoma
HSPA5	9q33.3	1	3.13	0	0.00	0.914	0.935	(A) BRAF Class 1 Melanoma
USP7	16p13.2	1	3.13	0	0.00	0.914	0.935	(A) BRAF Class 1 Melanoma
MAP3K7	6q15	1	1.27	0	0.00	0.919	0.938	(A) BRAF Class 1 Melanoma
IRF2	4q35.1	1	0.42	0	0.00	0.919	0.938	(A) BRAF Class 1 Melanoma
RACK1	5q35.3	1	1.67	0	0.00	0.923	0.94	(A) BRAF Class 1 Melanoma
RPL10	Xq28	1	2.70	0	0.00	0.925	0.94	(A) BRAF Class 1 Melanoma
HSP90AB1	6p21.1	1	1.27	0	0.00	0.929	0.94	(A) BRAF Class 1 Melanoma
DDX31	9q34.13	1	2.50	0	0.00	0.93	0.94	(A) BRAF Class 1 Melanoma
FOSB	19q13.32	1	2.50	0	0.00	0.93	0.94	(A) BRAF Class 1 Melanoma
OGA	10q24.32	1	2.50	0	0.00	0.93	0.94	(A) BRAF Class 1 Melanoma
OTX2	14q22.3	1	2.50	0	0.00	0.93	0.94	(A) BRAF Class 1 Melanoma
POLR2A	17p13.1	1	2.50	0	0.00	0.93	0.94	(A) BRAF Class 1 Melanoma
TBXT	6q27	1	2.50	0	0.00	0.93	0.94	(A) BRAF Class 1 Melanoma
PLAG1	8q12.1	1	1.16	0	0.00	0.935	0.943	(A) BRAF Class 1 Melanoma
CSNK1A1	5q32	1	0.63	0	0.00	0.941	0.947	(A) BRAF Class 1 Melanoma
NAB2	12q13.3	1	0.63	0	0.00	0.941	0.947	(A) BRAF Class 1 Melanoma
LAMP1	13q34	1	0.54	0	0.00	0.948	0.954	(A) BRAF Class 1 Melanoma
ETNK1	12p12.1	1	1.75	0	0.00	0.95	0.954	(A) BRAF Class 1 Melanoma
CD22	19q13.12	1	2.17	0	0.00	0.958	0.962	(A) BRAF Class 1 Melanoma
ECT2L	6q24.1	1	2.38	0	0.00	0.977	0.978	(A) BRAF Class 1 Melanoma
TBL1XR1	3q26.32	1	2.38	0	0.00	0.977	0.978	(A) BRAF Class 1 Melanoma
BRAF	7q34	1180	100.00	175	100.00	1	1	(B) BRAF Class 2 Melanoma

## Sheet: S8 Melanoma Class 1+2 Filtered
Table S8: Filtered Co-Mutations across BRAF Class 1 and 2 melanomas
Gene	Cytoband	Class 1 Occurrence	Class 1 %	Class 2 occurrence	Class 2 %	SumClass	pvalue	qvalue	Enriched In
SYK	9q22.2	16	2.72	9	10.59	25	0.001995	0.0423	(B) BRAF Class 2 Melanoma
CSF3R	1p34.3	13	1.85	8	8.33	21	0.001772	0.039	(B) BRAF Class 2 Melanoma
PPARG	3p25.2	17	2.64	9	10.71	26	0.001442	0.036	(B) BRAF Class 2 Melanoma
NOTCH4	6p21.32	32	6.54	13	18.84	45	0.001519	0.036	(B) BRAF Class 2 Melanoma
PAK5	20p12.2	62	13.45	20	28.99	82	0.001558	0.036	(B) BRAF Class 2 Melanoma
ATM	11q22.3	66	5.97	20	13.61	86	0.001325	0.036	(B) BRAF Class 2 Melanoma
TET2	4q24	70	9.00	22	19.30	92	0.001382	0.036	(B) BRAF Class 2 Melanoma
TP53	17p13.1	175	14.83	39	24.84	214	0.001535	0.036	(B) BRAF Class 2 Melanoma
JAK1	1p31.3	18	2.37	11	8.87	29	0.001013	0.03	(B) BRAF Class 2 Melanoma
KDR	4q12	87	7.87	25	17.01	112	0.0006097	0.022	(B) BRAF Class 2 Melanoma
SLIT2	4p15.31	28	10.61	10	38.46	38	0.0005359	0.0201	(B) BRAF Class 2 Melanoma
SF3B1	2q33.1	22	2.65	12	9.92	34	0.0005002	0.0196	(B) BRAF Class 2 Melanoma
FOXP1	3p13	9	1.74	8	10.81	17	0.0004007	0.0185	(B) BRAF Class 2 Melanoma
COL7A1	3p21.31	46	23.00	15	57.69	61	0.0004313	0.0185	(B) BRAF Class 2 Melanoma
FLT1	13q12.3	69	8.96	23	20.72	92	0.0004148	0.0185	(B) BRAF Class 2 Melanoma
ERBB4	2q34	107	9.54	32	18.93	139	0.0004513	0.0185	(B) BRAF Class 2 Melanoma
GRIN2A	16p13.2	92	17.49	27	36.00	119	0.0003277	0.0164	(B) BRAF Class 2 Melanoma
MAGI2	7q21.11	18	7.89	8	40.00	26	0.000268	0.0158	(B) BRAF Class 2 Melanoma
MET	7q31.2	68	5.80	24	13.87	92	0.0002833	0.0158	(B) BRAF Class 2 Melanoma
BLM	15q26.1	23	3.03	13	11.82	36	0.0001985	0.0128	(B) BRAF Class 2 Melanoma
RPTOR	17q25.3	34	4.73	16	15.69	50	0.0001383	0.009598	(B) BRAF Class 2 Melanoma
EPHA7	6q16.1	57	10.27	23	28.40	80	2.957e-05	0.002668	(B) BRAF Class 2 Melanoma
MPL	1p34.2	19	1.77	13	9.03	32	2.468e-05	0.002474	(B) BRAF Class 2 Melanoma
ATR	3q23	27	3.58	16	15.24	43	1.293e-05	0.001458	(B) BRAF Class 2 Melanoma
KMT2A	11q23.3	67	8.61	27	23.89	94	7.784e-06	0.001003	(B) BRAF Class 2 Melanoma
KMT2D	12q13.12	118	15.32	38	34.23	156	4.799e-06	0.0007215	(B) BRAF Class 2 Melanoma
CARD11	7p22.2	61	7.92	27	24.32	88	1.544e-06	0.0002785	(B) BRAF Class 2 Melanoma
NRAS	1p13.2	10	0.85	14	8.00	24	1.35e-07	3.034e-05	(B) BRAF Class 2 Melanoma
HNF1A	12q24.31	18	1.63	17	11.64	35	4.26e-08	1.281e-05	(B) BRAF Class 2 Melanoma
FLT3	13q12.2	41	3.70	28	19.05	69	2.01e-10	9.05e-08	(B) BRAF Class 2 Melanoma
NF1	17q11.2	50	6.19	36	27.07	86	2.05e-11	1.85e-08	(B) BRAF Class 2 Melanoma

## Sheet: S9 Melanoma Class1+3
Table S9: Co-Mutations across BRAF Class 1 and 3 melanomas
Gene	Cytoband	Class 1 Occurrence	Class 1 %	Class 3 occurrence	Class 3 %	pvalue	qvalue	Enriched In
NF1	17q11.2	52	6.41	79	64.75	8.93e-48	8.13e-45	(B) BRAF Class 3 Melanoma
NRAS	1p13.2	10	0.85	54	31.58	4.27e-42	1.94e-39	(B) BRAF Class 3 Melanoma
KRAS	12p12.1	5	0.42	17	9.94	3.81e-12	1.16e-09	(B) BRAF Class 3 Melanoma
FLT3	13q12.2	41	3.68	31	19.62	1.52e-11	3.46e-09	(B) BRAF Class 3 Melanoma
KMT2A	11q23.3	69	8.83	36	30.51	1.5e-09	2.74e-07	(B) BRAF Class 3 Melanoma
NOTCH2	1p12	44	5.54	28	24.35	2.55e-09	3.73e-07	(B) BRAF Class 3 Melanoma
SETD2	3p21.31	60	7.43	33	27.27	2.86e-09	3.73e-07	(B) BRAF Class 3 Melanoma
ARID2	12q12	66	8.66	34	29.31	7.44e-09	8.47e-07	(B) BRAF Class 3 Melanoma
FLT1	13q12.3	71	9.18	35	29.91	9.19e-09	8.81e-07	(B) BRAF Class 3 Melanoma
KMT2D	12q13.12	119	15.39	46	39.32	9.67e-09	8.81e-07	(B) BRAF Class 3 Melanoma
ATM	11q22.3	70	6.31	34	21.52	1.1e-08	9.08e-07	(B) BRAF Class 3 Melanoma
KDR	4q12	87	7.84	38	24.05	1.26e-08	9.56e-07	(B) BRAF Class 3 Melanoma
FGFR4	5q35.2	26	3.19	21	17.07	3.92e-08	2.746e-06	(B) BRAF Class 3 Melanoma
PTPRD	9p24.1-p23	88	15.71	36	43.37	4.36e-08	2.836e-06	(B) BRAF Class 3 Melanoma
ERBB4	2q34	109	9.69	42	25.77	6.04e-08	3.671e-06	(B) BRAF Class 3 Melanoma
TET2	4q24	70	8.96	33	27.97	6.66e-08	3.791e-06	(B) BRAF Class 3 Melanoma
HRAS	11p15.5	4	0.34	11	6.43	8.47e-08	4.539e-06	(B) BRAF Class 3 Melanoma
KIT	4q12	24	2.03	19	11.11	1.72e-07	8.697e-06	(B) BRAF Class 3 Melanoma
AXL	19q13.2	30	3.71	21	17.36	2.01e-07	9.628e-06	(B) BRAF Class 3 Melanoma
NTRK3	15q25.3	52	6.44	27	22.31	2.87e-07	1.307e-05	(B) BRAF Class 3 Melanoma
RUNX1T1	8q21.3	35	7.58	21	31.34	3.29e-07	1.425e-05	(B) BRAF Class 3 Melanoma
ROS1	6q22.1	150	17.38	49	37.69	3.66e-07	1.516e-05	(B) BRAF Class 3 Melanoma
MET	7q31.2	70	5.96	31	18.24	4.56e-07	1.793e-05	(B) BRAF Class 3 Melanoma
CARD11	7p22.2	61	7.89	29	24.79	4.72e-07	1.793e-05	(B) BRAF Class 3 Melanoma
BLM	15q26.1	23	3.02	18	15.52	6.37e-07	2.322e-05	(B) BRAF Class 3 Melanoma
IKZF1	7p12.2	62	8.07	29	24.79	7.02e-07	2.461e-05	(B) BRAF Class 3 Melanoma
MECOM	3q26.2	39	14.66	21	50.00	1.191e-06	4.018e-05	(B) BRAF Class 3 Melanoma
SMARCA4	19p13.2	50	6.19	25	20.66	1.519e-06	4.903e-05	(B) BRAF Class 3 Melanoma
FGFR2	10q26.13	47	3.97	24	14.04	1.561e-06	4.903e-05	(B) BRAF Class 3 Melanoma
IL7R	5p13.2	49	6.89	24	23.08	1.913e-06	5.81e-05	(B) BRAF Class 3 Melanoma
NOTCH1	9q34.3	49	4.20	24	14.46	2.065e-06	6.068e-05	(B) BRAF Class 3 Melanoma
CBL	11q23.3	30	3.68	19	15.57	2.509e-06	6.969e-05	(B) BRAF Class 3 Melanoma
GRIN2A	16p13.2	92	17.46	32	42.67	2.524e-06	6.969e-05	(B) BRAF Class 3 Melanoma
PREX2	8q13.2	75	17.69	27	45.76	4.483e-06	0.0001201	(B) BRAF Class 3 Melanoma
ARID1A	1p36.11	63	7.80	27	22.31	5.67e-06	0.0001476	(B) BRAF Class 3 Melanoma
RET	10q11.21	44	3.72	22	12.87	5.855e-06	0.0001482	(B) BRAF Class 3 Melanoma
ABCB11	2q31.1	11	4.93	11	34.38	6.084e-06	0.0001498	(B) BRAF Class 3 Melanoma
DDR2	1q23.3	19	2.16	15	11.19	6.405e-06	0.0001535	(B) BRAF Class 3 Melanoma
GLI1	12q13.3	31	4.23	18	16.51	1.038e-05	0.0002425	(B) BRAF Class 3 Melanoma
ALK	2p23.2-p23.1	71	6.00	28	16.37	1.095e-05	0.0002494	(B) BRAF Class 3 Melanoma
TP53	17p13.1	175	14.79	49	28.82	1.172e-05	0.0002605	(B) BRAF Class 3 Melanoma
CSF3R	1p34.3	13	1.85	12	11.65	1.265e-05	0.0002743	(B) BRAF Class 3 Melanoma
ASXL1	20q11.21	31	3.97	18	15.25	1.323e-05	0.0002793	(B) BRAF Class 3 Melanoma
EGFR	7p11.2	51	4.31	23	13.45	1.349e-05	0.0002793	(B) BRAF Class 3 Melanoma
EPHA3	3p11.1	45	7.63	21	23.86	1.896e-05	0.0003839	(B) BRAF Class 3 Melanoma
SYK	9q22.2	17	2.88	13	14.77	2.368e-05	0.000469	(B) BRAF Class 3 Melanoma
SETBP1	18q12.3	40	8.70	19	27.94	2.794e-05	0.0005416	(B) BRAF Class 3 Melanoma
PTPRT	20q12-q13.11	90	19.19	28	43.75	2.925e-05	0.0005551	(B) BRAF Class 3 Melanoma
TET1	10q21.3	31	5.02	16	19.05	3.144e-05	0.0005767	(B) BRAF Class 3 Melanoma
PTPN11	12q24.13	12	1.07	11	6.79	3.165e-05	0.0005767	(B) BRAF Class 3 Melanoma
EPHA7	6q16.1	58	10.41	23	28.40	3.533e-05	0.000631	(B) BRAF Class 3 Melanoma
COL7A1	3p21.31	46	22.89	18	62.07	3.672e-05	0.0006434	(B) BRAF Class 3 Melanoma
SYNE1	6q25.2	5	2.50	7	29.17	3.755e-05	0.0006454	(B) BRAF Class 3 Melanoma
EP300	22q13.2	42	5.43	20	17.09	4.008e-05	0.0006762	(B) BRAF Class 3 Melanoma
APC	5q22.2	74	6.86	27	17.42	4.231e-05	0.0007008	(B) BRAF Class 3 Melanoma
DICER1	14q32.13	25	3.30	15	13.27	4.96e-05	0.0007988	(B) BRAF Class 3 Melanoma
JAK3	19p13.11	37	3.32	18	11.32	4.998e-05	0.0007988	(B) BRAF Class 3 Melanoma
PDGFRB	5q32	32	3.96	17	14.05	5.207e-05	0.0008178	(B) BRAF Class 3 Melanoma
NOTCH3	19p13.12	87	11.65	29	26.85	5.859e-05	0.0009046	(B) BRAF Class 3 Melanoma
RPTOR	17q25.3	34	4.72	17	16.19	6.259e-05	0.0009504	(B) BRAF Class 3 Melanoma
SOX17	8q11.23	5	1.23	7	13.73	7.22e-05	0.001078	(B) BRAF Class 3 Melanoma
STAT5B	17q21.2	3	0.72	6	11.76	8.242e-05	0.001196	(B) BRAF Class 3 Melanoma
BARD1	2q35	6	0.83	8	7.62	8.268e-05	0.001196	(B) BRAF Class 3 Melanoma
CIC	19q13.2	40	5.54	18	17.14	0.0001075	0.001531	(B) BRAF Class 3 Melanoma
BRD4	19p13.12	39	5.13	18	15.93	0.000113	0.001584	(B) BRAF Class 3 Melanoma
ATRX	Xq21.1	47	5.82	20	16.53	0.0001266	0.001748	(B) BRAF Class 3 Melanoma
DAXX	6p21.32	16	2.26	11	11.11	0.0001339	0.001802	(B) BRAF Class 3 Melanoma
PBRM1	3p21.1	24	3.14	14	12.07	0.0001365	0.001802	(B) BRAF Class 3 Melanoma
NOTCH4	6p21.32	33	6.73	15	22.73	0.0001365	0.001802	(B) BRAF Class 3 Melanoma
PTK2B	8p21.2	9	4.19	9	25.71	0.0001491	0.001941	(B) BRAF Class 3 Melanoma
PAK5	20p12.2	63	13.64	21	33.87	0.0001636	0.002099	(B) BRAF Class 3 Melanoma
BRCA2	13q13.1	57	7.06	22	18.18	0.0001807	0.002287	(B) BRAF Class 3 Melanoma
GNAS	20q13.32	13	1.15	10	6.17	0.0001979	0.002446	(B) BRAF Class 3 Melanoma
CDH4	20q13.33	15	7.46	10	34.48	0.0001989	0.002446	(B) BRAF Class 3 Melanoma
FANCE	6p21.31	7	1.35	8	10.13	0.0002013	0.002446	(B) BRAF Class 3 Melanoma
MAP3K5	6q23.3	0	0.00	4	44.44	0.0002115	0.002536	(B) BRAF Class 3 Melanoma
PRKDC	8q11.21	54	10.53	21	26.58	0.0002246	0.002649	(B) BRAF Class 3 Melanoma
MTOR	1p36.22	41	4.73	18	13.85	0.0002268	0.002649	(B) BRAF Class 3 Melanoma
FANCM	14q21.2	13	4.78	10	23.26	0.0002446	0.002791	(B) BRAF Class 3 Melanoma
TSC2	16p13.3	30	3.70	15	12.40	0.0002451	0.002791	(B) BRAF Class 3 Melanoma
CCND2	12p13.32	10	1.25	9	7.44	0.0002501	0.002813	(B) BRAF Class 3 Melanoma
PTCH1	9q22.32	27	3.34	14	11.57	0.0003124	0.00347	(B) BRAF Class 3 Melanoma
HNF1A	12q24.31	18	1.63	11	7.10	0.0003298	0.003619	(B) BRAF Class 3 Melanoma
MAP3K1	5q11.2	27	3.50	14	11.97	0.0003446	0.003679	(B) BRAF Class 3 Melanoma
GATA3	10p14	20	2.59	12	10.26	0.0003467	0.003679	(B) BRAF Class 3 Melanoma
IGF1	12q23.2	2	0.43	5	8.06	0.0003473	0.003679	(B) BRAF Class 3 Melanoma
FOXO1	13q14.11	7	1.52	7	11.48	0.0003793	0.003917	(B) BRAF Class 3 Melanoma
STAT4	2q32.2-q32.3	10	3.60	8	21.05	0.0003809	0.003917	(B) BRAF Class 3 Melanoma
BMPR1A	10q23.2	6	0.81	7	6.54	0.0003827	0.003917	(B) BRAF Class 3 Melanoma
TP53BP1	15q15.3	18	4.41	11	18.03	0.0003955	0.004003	(B) BRAF Class 3 Melanoma
PDGFRA	4q12	50	4.32	19	11.52	0.0004088	0.004092	(B) BRAF Class 3 Melanoma
GATA6	18q11.2	4	0.85	6	8.96	0.0004146	0.004105	(B) BRAF Class 3 Melanoma
KDM5C	Xp11.22	24	3.14	13	11.21	0.0004204	0.004118	(B) BRAF Class 3 Melanoma
POLE	12q24.33	60	7.91	21	19.27	0.0004253	0.004121	(B) BRAF Class 3 Melanoma
SLIT2	4p15.31	28	10.61	12	35.29	0.0004386	0.004206	(B) BRAF Class 3 Melanoma
MGA	15q15.1	68	11.11	22	25.58	0.0004609	0.004373	(B) BRAF Class 3 Melanoma
TMPRSS2	21q22.3	15	2.09	10	9.52	0.000475	0.004461	(B) BRAF Class 3 Melanoma
FANCD2	3p25.3	23	4.45	12	16.22	0.0004818	0.004479	(B) BRAF Class 3 Melanoma
TERT	5p15.33	460	60.85	87	76.99	0.0004878	0.004489	(B) BRAF Class 3 Melanoma
KDM5A	12p13.33	22	3.07	12	11.43	0.0004977	0.004534	(B) BRAF Class 3 Melanoma
CIITA	16p13.13	18	6.52	11	25.00	0.0005282	0.004728	(B) BRAF Class 3 Melanoma
MPL	1p34.2	19	1.76	11	7.14	0.0005354	0.004728	(B) BRAF Class 3 Melanoma
FBXW7	4q31.3	30	2.66	14	8.64	0.0005373	0.004728	(B) BRAF Class 3 Melanoma
CUX1	7q22.1	34	7.62	15	22.39	0.0005398	0.004728	(B) BRAF Class 3 Melanoma
PIK3C2B	1q32.1	24	4.99	12	17.65	0.0005623	0.004879	(B) BRAF Class 3 Melanoma
PIK3CA	3q26.32	34	2.87	15	8.77	0.0005831	0.005011	(B) BRAF Class 3 Melanoma
BRIP1	17q23.2	29	3.75	14	11.97	0.0005988	0.005098	(B) BRAF Class 3 Melanoma
ARID1B	6q25.3	46	6.16	18	16.07	0.000641	0.005407	(B) BRAF Class 3 Melanoma
CBLB	3q13.11	8	2.76	8	16.00	0.0006504	0.005436	(B) BRAF Class 3 Melanoma
VEGFA	6p21.1	7	1.00	7	6.93	0.000678	0.005588	(B) BRAF Class 3 Melanoma
TP63	3q28	38	8.94	14	25.93	0.0006826	0.005588	(B) BRAF Class 3 Melanoma
KMT2B	19q13.12	40	10.96	15	30.00	0.0006869	0.005588	(B) BRAF Class 3 Melanoma
BRCA1	17q21.31	34	4.21	15	12.30	0.0007988	0.00644	(B) BRAF Class 3 Melanoma
NTRK1	1q23.1	42	5.10	17	13.60	0.0008148	0.006512	(B) BRAF Class 3 Melanoma
JAK2	9p24.1	24	2.16	12	7.55	0.0008343	0.006609	(B) BRAF Class 3 Melanoma
ERG	21q22.2	28	3.88	13	12.38	0.0008753	0.006874	(B) BRAF Class 3 Melanoma
ERBB2	17q12	24	2.03	12	7.02	0.0009094	0.007081	(B) BRAF Class 3 Melanoma
SPTA1	1q23.1	53	20.08	16	47.06	0.0009523	0.007352	(B) BRAF Class 3 Melanoma
SUFU	10q24.32	13	1.68	9	7.69	0.0009726	0.007446	(B) BRAF Class 3 Melanoma
POLQ	3q13.33	13	6.05	9	25.71	0.001002	0.007609	(B) BRAF Class 3 Melanoma
PIK3CG	7q22.3	30	5.68	13	17.33	0.001037	0.007804	(B) BRAF Class 3 Melanoma
FLT4	5q35.3	61	8.01	21	18.10	0.001075	0.00803	(B) BRAF Class 3 Melanoma
RUNX1	21q22.12	24	3.10	12	10.26	0.001202	0.008902	(B) BRAF Class 3 Melanoma
FAT1	4q35.2	92	13.22	26	26.00	0.001224	0.008994	(B) BRAF Class 3 Melanoma
MAGI2	7q21.11	18	7.89	8	32.00	0.001402	0.0102	(B) BRAF Class 3 Melanoma
CCNE1	19q12	8	0.99	7	5.79	0.001409	0.0102	(B) BRAF Class 3 Melanoma
MUTYH	1p34.1	14	1.81	9	7.69	0.001423	0.0102	(B) BRAF Class 3 Melanoma
NFKBIZ	3q12.3	1	0.40	4	9.76	0.001511	0.0108	(B) BRAF Class 3 Melanoma
TRAF7	16p13.3	12	1.86	8	8.70	0.001533	0.0108	(B) BRAF Class 3 Melanoma
RECQL4	8q24.3	35	5.13	14	14.29	0.001534	0.0108	(B) BRAF Class 3 Melanoma
TOP1	20q12	9	1.61	7	8.86	0.001576	0.011	(B) BRAF Class 3 Melanoma
FGF14	13q33.1	4	1.38	5	12.82	0.001638	0.0113	(B) BRAF Class 3 Melanoma
NTRK2	9q21.33	18	2.23	10	8.26	0.001647	0.0113	(B) BRAF Class 3 Melanoma
UPF1	19p13.11	0	0.00	3	12.50	0.001663	0.0113	(B) BRAF Class 3 Melanoma
ITK	5q33.3	4	1.92	5	17.24	0.001746	0.0118	(B) BRAF Class 3 Melanoma
GALNT12	9q22.33	0	0.00	3	7.50	0.001971	0.0132	(B) BRAF Class 3 Melanoma
MEF2B	19p13.11	6	0.78	6	5.13	0.002169	0.0144	(B) BRAF Class 3 Melanoma
ALOX12B	17p13.1	13	2.48	8	10.67	0.002201	0.0145	(B) BRAF Class 3 Melanoma
EBF1	5q33.3	0	0.00	3	25.00	0.002227	0.0146	(B) BRAF Class 3 Melanoma
CCNQ	Xq28	2	1.17	4	16.67	0.002291	0.0149	(B) BRAF Class 3 Melanoma
FANCA	16q24.3	27	3.34	12	9.92	0.002456	0.0159	(B) BRAF Class 3 Melanoma
NF2	22q12.2	16	1.97	9	7.44	0.002595	0.0165	(B) BRAF Class 3 Melanoma
PIK3C2G	12p12.3	47	9.94	15	23.81	0.002601	0.0165	(B) BRAF Class 3 Melanoma
NECTIN4	1q23.3	2	1.00	4	13.79	0.002606	0.0165	(B) BRAF Class 3 Melanoma
SNCAIP	5q23.2	36	13.09	12	34.29	0.002689	0.0169	(B) BRAF Class 3 Melanoma
CHEK1	11q24.2	2	0.26	4	3.67	0.002922	0.0182	(B) BRAF Class 3 Melanoma
PTEN	10q23.31	174	14.71	12	7.06	0.002968	0.0184	(A) BRAF Class 1 Melanoma
TCF3	19p13.3	14	2.12	8	8.60	0.002987	0.0184	(B) BRAF Class 3 Melanoma
LRP1B	2q22.1-q22.2	86	30.82	21	55.26	0.003066	0.0186	(B) BRAF Class 3 Melanoma
EZH2	7q36.1	33	3.19	13	8.67	0.003069	0.0186	(B) BRAF Class 3 Melanoma
TFE3	Xp11.23	5	1.22	5	8.93	0.003315	0.02	(B) BRAF Class 3 Melanoma
PTPRB	12q15	5	9.26	5	55.56	0.003333	0.02	(B) BRAF Class 3 Melanoma
STAG2	Xq25	24	3.11	11	9.40	0.003358	0.02	(B) BRAF Class 3 Melanoma
XPO1	2p15	7	0.87	6	4.96	0.00342	0.0201	(B) BRAF Class 3 Melanoma
COP1	1q25.1-q25.2	5	1.09	5	7.94	0.003427	0.0201	(B) BRAF Class 3 Melanoma
HABP2	10q25.3	8	3.98	6	20.69	0.003529	0.0206	(B) BRAF Class 3 Melanoma
MCM8	20p12.3	5	2.49	5	17.24	0.003657	0.0212	(B) BRAF Class 3 Melanoma
SPRED1	15q14	2	0.97	4	12.12	0.003702	0.0213	(B) BRAF Class 3 Melanoma
SRC	20q11.23	8	0.86	6	4.65	0.003822	0.0219	(B) BRAF Class 3 Melanoma
CXCR4	2q22.1	5	0.78	5	5.56	0.00392	0.0223	(B) BRAF Class 3 Melanoma
IGF1R	15q26.3	42	5.15	15	12.30	0.003961	0.0224	(B) BRAF Class 3 Melanoma
MST1R	3p21.31	13	2.77	7	11.67	0.003998	0.0225	(B) BRAF Class 3 Melanoma
ERBB3	12q13.2	21	2.59	10	8.20	0.004023	0.0225	(B) BRAF Class 3 Melanoma
CDK8	13q12.13	11	1.52	7	6.67	0.004225	0.0235	(B) BRAF Class 3 Melanoma
ARHGAP35	19q13.32	14	5.83	8	21.05	0.004481	0.0247	(B) BRAF Class 3 Melanoma
IDH2	15q26.1	8	0.72	6	3.68	0.005041	0.0277	(B) BRAF Class 3 Melanoma
MCL1	1q21.2	5	0.65	5	4.27	0.005298	0.0289	(B) BRAF Class 3 Melanoma
MTA1	14q32.33	3	1.49	4	13.79	0.005543	0.0301	(B) BRAF Class 3 Melanoma
KEAP1	19p13.2	8	1.05	6	5.17	0.00567	0.0306	(B) BRAF Class 3 Melanoma
RHOH	4p14	3	1.32	4	12.12	0.005709	0.0306	(B) BRAF Class 3 Melanoma
PPARG	3p25.2	17	2.64	8	9.20	0.005741	0.0306	(B) BRAF Class 3 Melanoma
CUL3	2q36.2	6	1.13	5	6.85	0.005817	0.0308	(B) BRAF Class 3 Melanoma
MALT1	18q21.32	7	1.67	5	9.62	0.005844	0.0308	(B) BRAF Class 3 Melanoma
RAF1	3p25.2	8	0.97	6	4.76	0.005915	0.031	(B) BRAF Class 3 Melanoma
DOCK8	9p24.3	13	6.47	7	24.14	0.00597	0.031	(B) BRAF Class 3 Melanoma
COL2A1	12q13.11	3	5.56	4	44.44	0.005983	0.031	(B) BRAF Class 3 Melanoma
LZTR1	22q11.21|22q11.1-q11.2	7	2.62	5	14.71	0.006094	0.0313	(B) BRAF Class 3 Melanoma
FGFR3	4p16.3	32	2.70	12	7.02	0.006109	0.0313	(B) BRAF Class 3 Melanoma
USP6	17p13.2	0	0.00	2	33.33	0.006211	0.0316	(B) BRAF Class 3 Melanoma
AR	Xq12	31	3.84	12	9.84	0.006425	0.0325	(B) BRAF Class 3 Melanoma
PIK3CD	1p36.22	7	1.62	5	9.09	0.006499	0.0327	(B) BRAF Class 3 Melanoma
DNMT3B	20q11.21	11	2.70	6	11.76	0.006669	0.0334	(B) BRAF Class 3 Melanoma
HOXB13	17q21.32	6	0.90	5	5.26	0.00676	0.0337	(B) BRAF Class 3 Melanoma
LYN	8q12.1	15	3.83	7	14.00	0.007009	0.0347	(B) BRAF Class 3 Melanoma
TCF7L2	10q25.2-q25.3	9	1.30	6	5.88	0.007453	0.0367	(B) BRAF Class 3 Melanoma
NSD2	4p16.3	12	2.80	7	10.45	0.008096	0.0397	(B) BRAF Class 3 Melanoma
PALB2	16p12.2	24	2.97	10	8.26	0.008157	0.0397	(B) BRAF Class 3 Melanoma
TOPBP1	3q22.1	7	3.40	5	17.24	0.008681	0.0421	(B) BRAF Class 3 Melanoma
GLI3	7p14.1	6	8.70	5	41.67	0.008746	0.0422	(B) BRAF Class 3 Melanoma
ZFHX4	8q21.13	11	20.37	6	66.67	0.008836	0.0422	(B) BRAF Class 3 Melanoma
ARAF	Xp11.3	6	0.73	5	4.00	0.00884	0.0422	(B) BRAF Class 3 Melanoma
XPC	3p25.1	9	3.17	6	13.33	0.009062	0.043	(B) BRAF Class 3 Melanoma
FAT3	11q14.3	8	7.41	6	30.00	0.009239	0.0436	(B) BRAF Class 3 Melanoma
PRKCZ	1p36.33	1	1.45	3	25.00	0.009422	0.0442	(B) BRAF Class 3 Melanoma
PAX7	1p36.13	5	2.25	4	14.81	0.009574	0.0447	(B) BRAF Class 3 Melanoma
SMAD4	18q21.2	10	0.89	6	3.70	0.009732	0.0452	(B) BRAF Class 3 Melanoma
FANCI	15q26.1	11	2.46	6	9.84	0.009962	0.0461	(B) BRAF Class 3 Melanoma
XRCC4	5q14.2	4	1.99	4	13.79	0.0101	0.0465	(B) BRAF Class 3 Melanoma
SLX4	16p13.3	29	5.47	10	14.08	0.0105	0.0481	(B) BRAF Class 3 Melanoma
INHBA	7p14.1	23	4.49	9	12.50	0.0106	0.0483	(B) BRAF Class 3 Melanoma
EPCAM	2p21	4	0.61	4	4.30	0.0107	0.0483	(B) BRAF Class 3 Melanoma
CDH1	16q22.1	18	1.67	8	5.19	0.0107	0.0483	(B) BRAF Class 3 Melanoma
TENT5C	1p12	17	2.20	8	6.84	0.011	0.0493	(B) BRAF Class 3 Melanoma
RAC1	7p22.1	36	4.38	12	10.17	0.0116	0.0519	(B) BRAF Class 3 Melanoma
ATR	3q23	27	3.57	10	9.17	0.012	0.053	(B) BRAF Class 3 Melanoma
POLD1	19q13.33	27	3.82	10	9.80	0.012	0.053	(B) BRAF Class 3 Melanoma
PGR	11q22.1	18	4.58	7	14.58	0.0121	0.0534	(B) BRAF Class 3 Melanoma
SPEN	1p36.21-p36.13	53	9.85	15	19.74	0.0124	0.0543	(B) BRAF Class 3 Melanoma
SOX9	17q24.3	7	0.92	5	4.42	0.0126	0.0548	(B) BRAF Class 3 Melanoma
PHOX2B	4p13	18	2.55	8	7.62	0.0128	0.0556	(B) BRAF Class 3 Melanoma
DNMT3A	2p23.3	26	3.33	10	8.47	0.0132	0.057	(B) BRAF Class 3 Melanoma
MYCN	2p24.3	14	1.73	7	5.74	0.0134	0.0577	(B) BRAF Class 3 Melanoma
DIS3	13q21.33	14	1.87	7	6.14	0.0138	0.0589	(B) BRAF Class 3 Melanoma
CREBBP	16p13.3	40	4.95	13	10.74	0.0138	0.0589	(B) BRAF Class 3 Melanoma
PPP2R1A	19q13.41	15	1.98	7	6.42	0.014	0.0595	(B) BRAF Class 3 Melanoma
MSI2	17q22	0	0.00	2	8.33	0.0146	0.0615	(B) BRAF Class 3 Melanoma
RB1	13q14.2	33	2.96	11	6.96	0.015	0.0629	(B) BRAF Class 3 Melanoma
POLB	8p11.21	0	0.00	2	6.90	0.0154	0.0644	(B) BRAF Class 3 Melanoma
GLI2	2q14.2	32	11.11	12	24.00	0.0156	0.065	(B) BRAF Class 3 Melanoma
ETV1	7p21.2	15	2.07	7	6.54	0.0159	0.0658	(B) BRAF Class 3 Melanoma
ARHGEF12	11q23.3	5	2.46	4	13.79	0.0161	0.0659	(B) BRAF Class 3 Melanoma
UIMC1	5q35.2	5	2.46	4	13.79	0.0161	0.0659	(B) BRAF Class 3 Melanoma
RICTOR	5p13.1	24	3.17	9	8.26	0.0161	0.0659	(B) BRAF Class 3 Melanoma
EML4	2p21	4	2.15	3	16.67	0.0163	0.0662	(B) BRAF Class 3 Melanoma
PMS1	2q32.2	15	2.13	7	6.67	0.0163	0.0662	(B) BRAF Class 3 Melanoma
RHBDF2	17q25.1	5	2.49	4	13.79	0.0166	0.0669	(B) BRAF Class 3 Melanoma
DOT1L	19p13.3	25	4.65	9	11.84	0.0167	0.0671	(B) BRAF Class 3 Melanoma
DROSHA	5p13.3	9	4.66	5	18.52	0.0176	0.0703	(B) BRAF Class 3 Melanoma
MLLT3	9p21.3	1	0.60	2	13.33	0.018	0.0714	(B) BRAF Class 3 Melanoma
SPOP	17q21.33	5	0.66	4	3.67	0.0182	0.0714	(B) BRAF Class 3 Melanoma
RRAGC	1p34.3	0	0.00	2	6.06	0.0184	0.0714	(B) BRAF Class 3 Melanoma
RRAS	19q13.33	0	0.00	2	6.06	0.0184	0.0714	(B) BRAF Class 3 Melanoma
RRAS2	11p15.2	0	0.00	2	6.06	0.0184	0.0714	(B) BRAF Class 3 Melanoma
POT1	7q31.33	2	0.74	3	7.14	0.0184	0.0714	(B) BRAF Class 3 Melanoma
PRKCA	17q24.2	0	0.00	2	16.67	0.0185	0.0714	(B) BRAF Class 3 Melanoma
TFEB	6p21.1	0	0.00	2	16.67	0.0185	0.0714	(B) BRAF Class 3 Melanoma
MYCL	1p34.2	8	0.99	5	4.13	0.0187	0.0718	(B) BRAF Class 3 Melanoma
LIFR	5p13.1	2	3.39	3	30.00	0.0194	0.0742	(B) BRAF Class 3 Melanoma
RBBP8	18q11.2	9	4.48	5	17.24	0.02	0.0762	(B) BRAF Class 3 Melanoma
CEBPA	19q13.11	5	0.66	4	3.51	0.0203	0.0768	(B) BRAF Class 3 Melanoma
E2F3	6p22.3	3	0.74	3	5.88	0.0203	0.0768	(B) BRAF Class 3 Melanoma
ADGRA2	8p11.23	6	2.29	4	11.43	0.0204	0.0768	(B) BRAF Class 3 Melanoma
NCKAP5	2q21.2	2	6.25	3	50.00	0.0207	0.0775	(B) BRAF Class 3 Melanoma
GSK3B	3q13.33	9	1.67	5	6.58	0.0208	0.0775	(B) BRAF Class 3 Melanoma
MDM2	12q15	12	1.49	6	4.96	0.0212	0.079	(B) BRAF Class 3 Melanoma
ZNRF3	22q12.1	9	3.56	5	13.51	0.0219	0.0809	(B) BRAF Class 3 Melanoma
MSH2	2p21-p16.3	16	2.04	7	5.93	0.022	0.0811	(B) BRAF Class 3 Melanoma
CDC73	1q31.2	12	1.55	6	5.13	0.0221	0.0813	(B) BRAF Class 3 Melanoma
GRM3	7q21.11-q21.12	31	11.27	9	25.71	0.0224	0.0819	(B) BRAF Class 3 Melanoma
PRDM14	8q13.3	6	3.51	4	16.67	0.0226	0.0823	(B) BRAF Class 3 Melanoma
AMER1	Xq11.2	22	4.08	8	10.53	0.0227	0.0823	(B) BRAF Class 3 Melanoma
BCL6	3q27.3	16	2.07	7	5.98	0.0228	0.0823	(B) BRAF Class 3 Melanoma
NSD3	8p11.23	9	2.45	5	9.26	0.0233	0.0837	(B) BRAF Class 3 Melanoma
ABL1	9q34.12	26	2.41	9	5.84	0.0233	0.0837	(B) BRAF Class 3 Melanoma
DCC	18q21.2	13	16.46	6	46.15	0.0242	0.0864	(B) BRAF Class 3 Melanoma
HGF	7q21.11	37	6.88	11	14.47	0.0247	0.088	(B) BRAF Class 3 Melanoma
NEIL3	4q34.3	6	2.99	4	13.79	0.0252	0.089	(B) BRAF Class 3 Melanoma
PTPN14	1q32.3-q41	6	2.99	4	13.79	0.0252	0.089	(B) BRAF Class 3 Melanoma
TSC1	9q34.13	30	3.70	10	8.26	0.0259	0.0911	(B) BRAF Class 3 Melanoma
MEN1	11q13.1	9	1.16	5	4.27	0.027	0.0947	(B) BRAF Class 3 Melanoma
ELOC	8q21.11	3	0.49	3	3.49	0.0274	0.0957	(B) BRAF Class 3 Melanoma
SF3B1	2q33.1	21	2.53	8	6.35	0.0278	0.096	(B) BRAF Class 3 Melanoma
BABAM2	2p23.2	3	1.49	3	10.34	0.0279	0.096	(B) BRAF Class 3 Melanoma
SERPINA1	14q32.13	3	1.49	3	10.34	0.0279	0.096	(B) BRAF Class 3 Melanoma
UROD	1p34.1	3	1.49	3	10.34	0.0279	0.096	(B) BRAF Class 3 Melanoma
ACVR1	2q24.1	10	1.59	5	5.62	0.0286	0.0979	(B) BRAF Class 3 Melanoma
PAX5	9p13.2	13	1.66	6	5.08	0.0288	0.0981	(B) BRAF Class 3 Melanoma
RAD51B	14q24.1	7	1.37	4	5.97	0.0292	0.0991	(B) BRAF Class 3 Melanoma
XRCC1	19q13.31	3	1.38	3	9.38	0.0293	0.0991	(B) BRAF Class 3 Melanoma
TBX3	12q24.21	28	5.29	9	12.00	0.0294	0.0993	(B) BRAF Class 3 Melanoma
CDKN1A	6p21.2	3	0.40	3	2.65	0.0317	0.107	(B) BRAF Class 3 Melanoma
EIF4A2	3q27.3	1	0.25	2	4.17	0.0322	0.108	(B) BRAF Class 3 Melanoma
SRSF2	17q25.1	10	1.44	5	4.90	0.0328	0.109	(B) BRAF Class 3 Melanoma
COL1A1	17q21.33	3	3.70	3	23.08	0.0329	0.109	(B) BRAF Class 3 Melanoma
NCOA2	8q13.3	3	3.70	3	23.08	0.0329	0.109	(B) BRAF Class 3 Melanoma
FGF5	4q21.21	2	1.26	2	14.29	0.0333	0.11	(B) BRAF Class 3 Melanoma
EED	11q14.2	7	1.40	4	5.80	0.0338	0.111	(B) BRAF Class 3 Melanoma
ESR1	6q25.1-q25.2	18	2.08	7	5.38	0.0346	0.114	(B) BRAF Class 3 Melanoma
FRS2	12q15	1	0.38	2	5.88	0.0353	0.115	(B) BRAF Class 3 Melanoma
TYK2	19p13.2	3	3.85	3	23.08	0.036	0.117	(B) BRAF Class 3 Melanoma
MLH3	14q24.3	3	1.15	3	7.14	0.0368	0.119	(B) BRAF Class 3 Melanoma
RIT1	1q22	7	1.08	4	4.35	0.0374	0.121	(B) BRAF Class 3 Melanoma
CDK12	17q12	24	3.17	8	7.34	0.0379	0.122	(B) BRAF Class 3 Melanoma
MDC1	6p21.33	29	7.11	8	15.69	0.0401	0.128	(B) BRAF Class 3 Melanoma
KAT6A	8p11.21	20	4.28	7	10.45	0.0404	0.128	(B) BRAF Class 3 Melanoma
EPAS1	2p21	1	0.58	2	8.33	0.0404	0.128	(B) BRAF Class 3 Melanoma
SESN2	1p35.3	1	0.58	2	8.33	0.0404	0.128	(B) BRAF Class 3 Melanoma
FLCN	17p11.2	7	0.91	4	3.51	0.0424	0.134	(B) BRAF Class 3 Melanoma
GPC3	Xq26.2	6	1.92	4	7.55	0.0427	0.134	(B) BRAF Class 3 Melanoma
PLCG2	16q23.3	18	3.84	6	10.00	0.0434	0.136	(B) BRAF Class 3 Melanoma
NIPBL	5p13.2	1	1.69	2	22.22	0.0441	0.138	(B) BRAF Class 3 Melanoma
GNAQ	9q21.2	11	0.98	5	3.01	0.0445	0.139	(B) BRAF Class 3 Melanoma
BCL10	1p22.3	5	1.20	3	5.77	0.0479	0.149	(B) BRAF Class 3 Melanoma
PDCD1	2q37.3	5	1.14	3	5.45	0.0491	0.152	(B) BRAF Class 3 Melanoma
USP28	11q23.2	8	3.98	4	13.79	0.0494	0.153	(B) BRAF Class 3 Melanoma
RAD21	8q24.11	16	2.27	6	5.83	0.0499	0.154	(B) BRAF Class 3 Melanoma
ERCC3	2q14.3	12	1.79	5	5.21	0.0506	0.155	(B) BRAF Class 3 Melanoma
CDKN1B	12p13.1	4	0.50	3	2.48	0.051	0.156	(B) BRAF Class 3 Melanoma
SMARCB1	22q11.23|22q11	8	0.72	4	2.53	0.0512	0.156	(B) BRAF Class 3 Melanoma
CDKN2C	1p32.3	4	0.52	3	2.56	0.0525	0.159	(B) BRAF Class 3 Melanoma
PIK3CB	3q22.3	14	2.64	5	7.35	0.0533	0.161	(B) BRAF Class 3 Melanoma
RASA2	3q23	1	1.41	2	16.67	0.0534	0.161	(B) BRAF Class 3 Melanoma
CHD5	1p36.31	4	7.41	3	33.33	0.054	0.162	(B) BRAF Class 3 Melanoma
PTK2	8q24.3	1	1.45	2	16.67	0.056	0.167	(B) BRAF Class 3 Melanoma
RHPN2	19q13.11	1	1.45	2	16.67	0.056	0.167	(B) BRAF Class 3 Melanoma
BCORL1	Xq26.1	30	5.68	9	11.25	0.0566	0.168	(B) BRAF Class 3 Melanoma
FGF3	11q13.3	13	2.27	5	6.25	0.0575	0.17	(B) BRAF Class 3 Melanoma
RSPO2	8q23.1	4	1.28	3	6.00	0.0577	0.17	(B) BRAF Class 3 Melanoma
MRE11	11q21	17	2.25	6	5.50	0.0578	0.17	(B) BRAF Class 3 Melanoma
IKZF2	2q34	4	5.63	3	25.00	0.0588	0.173	(B) BRAF Class 3 Melanoma
MITF	3p13	35	4.53	10	8.55	0.0591	0.173	(B) BRAF Class 3 Melanoma
CSDE1	1p13.2	2	0.64	2	5.26	0.0599	0.175	(B) BRAF Class 3 Melanoma
HIST3H3	1q42.13	2	0.51	2	4.17	0.0604	0.176	(B) BRAF Class 3 Melanoma
REL	2p16.1	8	1.04	4	3.42	0.0612	0.177	(B) BRAF Class 3 Melanoma
CSF1R	5q32	28	3.04	8	6.25	0.0615	0.178	(B) BRAF Class 3 Melanoma
FAS	10q23.31	5	1.02	3	4.41	0.0624	0.18	(B) BRAF Class 3 Melanoma
STK40	1p34.3	2	0.49	2	3.92	0.0628	0.18	(B) BRAF Class 3 Melanoma
NEGR1	1p31.1	14	3.22	5	8.47	0.0636	0.182	(B) BRAF Class 3 Melanoma
IRF4	6p25.3	5	0.93	3	3.95	0.0642	0.183	(B) BRAF Class 3 Melanoma
ZFHX3	16q22.2-q22.3	36	8.39	9	15.79	0.0651	0.185	(B) BRAF Class 3 Melanoma
GATA2	3q21.3	13	1.74	5	4.63	0.0653	0.185	(B) BRAF Class 3 Melanoma
ERCC2	19q13.32	26	3.27	8	6.67	0.0655	0.185	(B) BRAF Class 3 Melanoma
PRF1	10q22.1	12	4.63	5	12.20	0.0658	0.185	(B) BRAF Class 3 Melanoma
MTAP	9p21.3	19	8.84	6	20.00	0.0659	0.185	(B) BRAF Class 3 Melanoma
EXT1	8q24.11	8	2.82	4	8.89	0.0662	0.185	(B) BRAF Class 3 Melanoma
TRAF2	9q34.3	6	1.46	3	5.88	0.0663	0.185	(B) BRAF Class 3 Melanoma
YES1	18p11.32	6	1.47	3	5.88	0.0671	0.187	(B) BRAF Class 3 Melanoma
NFKBIE	6p21.1	8	3.38	4	10.53	0.0677	0.188	(B) BRAF Class 3 Melanoma
SOS1	2p22.1	8	2.05	4	6.45	0.0678	0.188	(B) BRAF Class 3 Melanoma
ERCC5	13q33.1	18	2.69	6	6.25	0.0682	0.188	(B) BRAF Class 3 Melanoma
ABL2	1q25.2	6	2.19	3	8.57	0.0695	0.191	(B) BRAF Class 3 Melanoma
STK11	19p13.3	18	1.60	6	3.70	0.0697	0.191	(B) BRAF Class 3 Melanoma
SMARCAL1	2q35	0	0.00	1	33.33	0.0698	0.191	(B) BRAF Class 3 Melanoma
JAK1	1p31.3	18	2.37	6	5.45	0.0708	0.193	(B) BRAF Class 3 Melanoma
ANKRD11	16q24.3	28	7.12	7	14.58	0.0714	0.194	(B) BRAF Class 3 Melanoma
BCL2L12	19q13.33	4	1.50	3	6.38	0.0718	0.195	(B) BRAF Class 3 Melanoma
PPM1D	17q23.2	14	2.29	5	5.81	0.0724	0.196	(B) BRAF Class 3 Melanoma
SMAD3	15q22.33	2	0.39	2	2.82	0.0743	0.2	(B) BRAF Class 3 Melanoma
FANCG	9p13.3	5	0.95	3	3.75	0.0749	0.201	(B) BRAF Class 3 Melanoma
KDM6A	Xp11.3	13	1.68	5	4.27	0.0752	0.201	(B) BRAF Class 3 Melanoma
TNFAIP3	6q23.3	13	1.68	5	4.27	0.0752	0.201	(B) BRAF Class 3 Melanoma
MYB	6q23.3	9	1.75	4	5.19	0.0756	0.201	(B) BRAF Class 3 Melanoma
H3F3B	17q25.1	2	0.32	2	2.25	0.0768	0.204	(B) BRAF Class 3 Melanoma
PDCD1LG2	9p24.1	9	1.36	4	4.00	0.0775	0.205	(B) BRAF Class 3 Melanoma
DMC1	22q13.1	2	1.00	2	6.90	0.0785	0.206	(B) BRAF Class 3 Melanoma
NR0B1	Xp21.2	2	1.00	2	6.90	0.0785	0.206	(B) BRAF Class 3 Melanoma
RHOT1	17q11.2	2	1.00	2	6.90	0.0785	0.206	(B) BRAF Class 3 Melanoma
FOXP1	3p13	10	1.93	4	5.56	0.0789	0.207	(B) BRAF Class 3 Melanoma
EPHA5	4q13.1-q13.2	18	3.11	6	6.90	0.0802	0.209	(B) BRAF Class 3 Melanoma
TGFBR2	3p24.1	10	1.86	4	5.26	0.0821	0.214	(B) BRAF Class 3 Melanoma
MSH6	2p16.3	28	3.45	8	6.61	0.0827	0.215	(B) BRAF Class 3 Melanoma
ZMYM2	13q12.11	0	0.00	1	25.00	0.0833	0.216	(B) BRAF Class 3 Melanoma
BCL11B	14q32.2	15	6.44	5	15.15	0.0845	0.218	(B) BRAF Class 3 Melanoma
ADAMTS20	12q12	0	0.00	1	25.00	0.0851	0.218	(B) BRAF Class 3 Melanoma
MAGEA1	Xq28	0	0.00	1	25.00	0.0851	0.218	(B) BRAF Class 3 Melanoma
THBS1	15q14	0	0.00	1	25.00	0.0851	0.218	(B) BRAF Class 3 Melanoma
SLITRK6	13q31.1	6	8.11	4	23.53	0.0865	0.221	(B) BRAF Class 3 Melanoma
WAS	Xp11.23	6	2.58	3	9.09	0.0868	0.221	(B) BRAF Class 3 Melanoma
IRS1	2q36.3	7	1.72	3	5.88	0.0884	0.224	(B) BRAF Class 3 Melanoma
NCOR1	17p12-p11.2	30	5.83	8	10.81	0.0894	0.226	(B) BRAF Class 3 Melanoma
FLI1	11q24.3	4	2.17	2	11.11	0.0909	0.229	(B) BRAF Class 3 Melanoma
EZH1	17q21.2	2	0.97	2	6.06	0.0922	0.232	(B) BRAF Class 3 Melanoma
ETV6	12p13.2	14	1.82	5	4.27	0.0935	0.234	(B) BRAF Class 3 Melanoma
ETS1	11q24.3	3	1.36	2	7.41	0.0937	0.234	(B) BRAF Class 3 Melanoma
RSPO3	6q22.33	2	0.79	2	4.88	0.0943	0.235	(B) BRAF Class 3 Melanoma
DDX3X	Xp11.4	2	2.56	2	15.38	0.0963	0.24	(B) BRAF Class 3 Melanoma
H3F3C	12p11.21	3	0.74	2	3.92	0.0973	0.241	(B) BRAF Class 3 Melanoma
MAP2K2	19p13.3	15	1.98	5	4.55	0.0974	0.241	(B) BRAF Class 3 Melanoma
GNA11	19p13.3	6	0.54	3	1.81	0.0987	0.244	(B) BRAF Class 3 Melanoma
PRKAR1A	17q24.2	10	1.29	4	3.42	0.0995	0.245	(B) BRAF Class 3 Melanoma
TLR4	9q33.1	7	7.07	4	19.05	0.1	0.246	(B) BRAF Class 3 Melanoma
RBL2	16q12.2	2	2.90	2	16.67	0.102	0.251	(B) BRAF Class 3 Melanoma
GATA4	8p23.1	11	2.33	4	5.97	0.103	0.251	(B) BRAF Class 3 Melanoma
RIF1	2q23.3	11	5.47	4	13.79	0.103	0.252	(B) BRAF Class 3 Melanoma
PIK3R2	19p13.11	11	2.08	4	5.33	0.104	0.252	(B) BRAF Class 3 Melanoma
BIRC2	11q22.2	0	0.00	1	20.00	0.104	0.252	(B) BRAF Class 3 Melanoma
TEX12	11q23.1	0	0.00	1	5.88	0.105	0.254	(B) BRAF Class 3 Melanoma
GEN1	2p24.2	3	0.74	2	3.70	0.106	0.256	(B) BRAF Class 3 Melanoma
LATS2	13q12.11	13	3.17	4	7.84	0.107	0.256	(B) BRAF Class 3 Melanoma
DNAH9	17p12	2	7.41	1	100.00	0.107	0.257	(B) BRAF Class 3 Melanoma
NRG1	8p12	18	4.72	5	10.20	0.107	0.257	(B) BRAF Class 3 Melanoma
KAT6B	10q22.2	16	7.02	5	15.15	0.108	0.257	(B) BRAF Class 3 Melanoma
FOXF1	16q24.1	1	4.76	0	0.00	0.109	0.259	(A) BRAF Class 1 Melanoma
SLFN11	17q12	1	4.76	0	0.00	0.109	0.259	(A) BRAF Class 1 Melanoma
PLCB4	20p12.3-p12.2	5	7.25	3	23.08	0.11	0.259	(B) BRAF Class 3 Melanoma
TSHZ2	20q13.2	2	6.25	2	33.33	0.11	0.259	(B) BRAF Class 3 Melanoma
ABRAXAS1	4q21.23	3	0.45	2	2.17	0.115	0.27	(B) BRAF Class 3 Melanoma
SHOC2	10q25.2	3	1.75	2	8.33	0.115	0.27	(B) BRAF Class 3 Melanoma
CDH23	10q22.1	2	8.00	1	100.00	0.115	0.27	(B) BRAF Class 3 Melanoma
MED12	Xq13.1	37	4.89	9	8.18	0.116	0.272	(B) BRAF Class 3 Melanoma
FAN1	15q13.3	7	3.48	3	10.34	0.118	0.273	(B) BRAF Class 3 Melanoma
XRCC6	22q13.2	7	3.48	3	10.34	0.118	0.273	(B) BRAF Class 3 Melanoma
USP8	15q21.2	3	1.47	2	6.90	0.118	0.274	(B) BRAF Class 3 Melanoma
MCM7	7q22.1	1	4.35	0	0.00	0.119	0.274	(A) BRAF Class 1 Melanoma
TAL1	1p33	7	3.07	3	9.09	0.119	0.274	(B) BRAF Class 3 Melanoma
DDB1	11q12.2	3	1.49	2	6.90	0.121	0.277	(B) BRAF Class 3 Melanoma
RINT1	7q22.3	3	1.49	2	6.90	0.121	0.277	(B) BRAF Class 3 Melanoma
NSD1	5q35.3	48	6.80	11	10.58	0.121	0.277	(B) BRAF Class 3 Melanoma
FANCC	9q22.32	11	1.42	4	3.42	0.122	0.279	(B) BRAF Class 3 Melanoma
PGBD3	10q11.23	3	0.25	2	1.17	0.123	0.279	(B) BRAF Class 3 Melanoma
RECQL	12p12.1	0	0.00	1	4.17	0.123	0.28	(B) BRAF Class 3 Melanoma
TSHR	14q31.1	16	2.20	5	4.63	0.123	0.28	(B) BRAF Class 3 Melanoma
MAF	16q23.2	0	0.00	1	2.94	0.125	0.281	(B) BRAF Class 3 Melanoma
SRY	Yp11.2	0	0.00	1	3.45	0.125	0.281	(B) BRAF Class 3 Melanoma
RNF8	6p21.2	0	0.00	1	3.45	0.126	0.281	(B) BRAF Class 3 Melanoma
INHBE	12q13.3	0	0.00	1	0.58	0.126	0.281	(B) BRAF Class 3 Melanoma
SNTG1	8q11.21	0	0.00	1	0.58	0.126	0.281	(B) BRAF Class 3 Melanoma
TRBC2	7q34	0	0.00	1	0.58	0.126	0.281	(B) BRAF Class 3 Melanoma
TAF1	Xq13.1	10	4.24	3	11.54	0.127	0.281	(B) BRAF Class 3 Melanoma
EPHB1	3q22.2	28	5.19	7	9.21	0.127	0.281	(B) BRAF Class 3 Melanoma
IRS2	13q34	28	5.19	7	9.21	0.127	0.281	(B) BRAF Class 3 Melanoma
NBN	8q21.3	16	1.99	5	4.13	0.127	0.281	(B) BRAF Class 3 Melanoma
LRIG3	12q14.1	1	4.00	0	0.00	0.128	0.281	(A) BRAF Class 1 Melanoma
RBM10	Xp11.3	17	2.40	5	4.95	0.128	0.283	(B) BRAF Class 3 Melanoma
TRRAP	7q22.1	0	0.00	1	6.67	0.132	0.289	(B) BRAF Class 3 Melanoma
GNB1	1p36.33	1	3.85	0	0.00	0.132	0.289	(A) BRAF Class 1 Melanoma
PTPN1	20q13.13	0	0.00	1	11.11	0.132	0.289	(B) BRAF Class 3 Melanoma
BCL2	18q21.33	0	0.00	1	0.85	0.133	0.289	(B) BRAF Class 3 Melanoma
CDK2	12q13.2	0	0.00	1	6.25	0.133	0.29	(B) BRAF Class 3 Melanoma
AKT1	14q32.33	17	1.44	5	2.92	0.134	0.29	(B) BRAF Class 3 Melanoma
FGFR1	8p11.23	17	1.44	5	2.92	0.134	0.29	(B) BRAF Class 3 Melanoma
DNMT1	19p13.2	14	3.13	4	7.02	0.135	0.29	(B) BRAF Class 3 Melanoma
EWSR1	22q12.2	7	1.34	3	3.75	0.135	0.29	(B) BRAF Class 3 Melanoma
SH2D1A	Xq25	8	1.30	3	3.57	0.135	0.29	(B) BRAF Class 3 Melanoma
EGFL7	9q34.3	4	0.98	2	3.92	0.136	0.291	(B) BRAF Class 3 Melanoma
NRIP1	21q11.2-q21.1	1	2.50	1	33.33	0.136	0.291	(B) BRAF Class 3 Melanoma
SMARCA2	9p24.3	0	0.00	1	11.11	0.136	0.291	(B) BRAF Class 3 Melanoma
CDKN2A	9p21.3	298	26.42	50	30.86	0.137	0.291	(B) BRAF Class 3 Melanoma
DDIT3	12q13.3	0	0.00	1	7.69	0.138	0.292	(B) BRAF Class 3 Melanoma
MAML2	11q21	0	0.00	1	7.69	0.138	0.292	(B) BRAF Class 3 Melanoma
PDGFB	22q13.1	0	0.00	1	7.69	0.138	0.292	(B) BRAF Class 3 Melanoma
RTEL1	20q13.33	8	4.68	3	12.50	0.139	0.294	(B) BRAF Class 3 Melanoma
CRTC1	19p13.11	11	3.94	4	8.89	0.14	0.294	(B) BRAF Class 3 Melanoma
EPHA2	1p36.13	0	0.00	1	5.88	0.14	0.295	(B) BRAF Class 3 Melanoma
HIF1A	14q23.2	0	0.00	1	7.69	0.141	0.296	(B) BRAF Class 3 Melanoma
PRSS1	7q34	17	6.37	5	12.50	0.142	0.296	(B) BRAF Class 3 Melanoma
NCOA3	20q13.12	19	4.26	5	8.33	0.142	0.297	(B) BRAF Class 3 Melanoma
ASH2L	8p11.23	0	0.00	1	11.11	0.143	0.297	(B) BRAF Class 3 Melanoma
LMO2	11p13	3	1.18	2	4.88	0.144	0.298	(B) BRAF Class 3 Melanoma
LEF1	4q25	0	0.00	1	8.33	0.145	0.299	(B) BRAF Class 3 Melanoma
ROBO1	3p12.3	3	5.56	2	22.22	0.145	0.3	(B) BRAF Class 3 Melanoma
PTCH2	1p34.1	3	2.91	2	11.76	0.146	0.301	(B) BRAF Class 3 Melanoma
MLH1	3p22.2	18	1.62	5	3.16	0.147	0.303	(B) BRAF Class 3 Melanoma
LMO3	12p12.3	0	0.00	1	8.33	0.148	0.303	(B) BRAF Class 3 Melanoma
ZNF708	19p12	0	0.00	1	8.33	0.148	0.303	(B) BRAF Class 3 Melanoma
RAD50	5q31.1	23	3.08	6	5.56	0.148	0.303	(B) BRAF Class 3 Melanoma
INSR	19p13.2	20	4.22	5	8.06	0.151	0.307	(B) BRAF Class 3 Melanoma
BCOR	Xp11.4	38	4.92	9	7.69	0.152	0.309	(B) BRAF Class 3 Melanoma
EGR1	5q31.2	0	0.00	1	14.29	0.152	0.309	(B) BRAF Class 3 Melanoma
FYN	6q21	9	2.07	3	5.26	0.153	0.31	(B) BRAF Class 3 Melanoma
INSIG1	7q36.3	0	0.00	1	9.09	0.155	0.312	(B) BRAF Class 3 Melanoma
NPRL3	16p13.3	0	0.00	1	9.09	0.155	0.312	(B) BRAF Class 3 Melanoma
NAB2	12q13.3	1	0.63	1	7.14	0.156	0.313	(B) BRAF Class 3 Melanoma
FUBP1	1p31.1	4	0.76	2	2.78	0.156	0.313	(B) BRAF Class 3 Melanoma
CD79A	19q13.2	4	0.76	2	2.74	0.158	0.313	(B) BRAF Class 3 Melanoma
DGKH	13q14.11	0	0.00	1	16.67	0.158	0.313	(B) BRAF Class 3 Melanoma
ESPL1	12q13.13	0	0.00	1	16.67	0.158	0.313	(B) BRAF Class 3 Melanoma
OR5L1	11q12.1	0	0.00	1	16.67	0.158	0.313	(B) BRAF Class 3 Melanoma
TRIM28	19q13.43	0	0.00	1	16.67	0.158	0.313	(B) BRAF Class 3 Melanoma
TRIM33	1p13.2	1	2.22	1	25.00	0.158	0.313	(B) BRAF Class 3 Melanoma
SMYD3	1q44	4	2.34	2	8.33	0.16	0.316	(B) BRAF Class 3 Melanoma
TEK	9p21.2	19	7.51	5	13.89	0.163	0.321	(B) BRAF Class 3 Melanoma
PAK3	Xq23	9	3.23	3	7.89	0.163	0.321	(B) BRAF Class 3 Melanoma
NUTM1	15q14	17	7.42	4	14.81	0.167	0.327	(B) BRAF Class 3 Melanoma
EXO1	1q43	4	1.99	2	6.90	0.167	0.327	(B) BRAF Class 3 Melanoma
INPP4B	4q31.21	9	1.69	3	4.11	0.168	0.328	(B) BRAF Class 3 Melanoma
CADM2	3p12.1	3	5.00	2	18.18	0.169	0.328	(B) BRAF Class 3 Melanoma
HDAC9	7p21.1	3	9.38	2	33.33	0.169	0.328	(B) BRAF Class 3 Melanoma
INSRR	1q23.1	4	0.34	2	1.17	0.169	0.328	(B) BRAF Class 3 Melanoma
KIF1B	1p36.22	14	6.97	4	13.79	0.176	0.342	(B) BRAF Class 3 Melanoma
PMS2	7p22.1	19	2.39	5	4.35	0.177	0.342	(B) BRAF Class 3 Melanoma
CBFA2T3	16q24.3	9	4.43	3	10.34	0.178	0.343	(B) BRAF Class 3 Melanoma
SOX2	3q26.33	4	0.52	2	1.71	0.18	0.348	(B) BRAF Class 3 Melanoma
CD79B	17q23.3	4	0.52	2	1.71	0.181	0.349	(B) BRAF Class 3 Melanoma
SUZ12	17q11.2	9	1.30	3	3.03	0.182	0.35	(B) BRAF Class 3 Melanoma
STAT3	17q21.2	14	1.77	4	3.48	0.185	0.354	(B) BRAF Class 3 Melanoma
KLHL6	3q27.1	10	3.40	3	7.69	0.186	0.354	(B) BRAF Class 3 Melanoma
IRF2	4q35.1	1	0.42	1	3.85	0.187	0.356	(B) BRAF Class 3 Melanoma
DDB2	11p11.2	4	1.41	2	4.44	0.192	0.365	(B) BRAF Class 3 Melanoma
MAP3K9	14q24.2	4	6.45	2	20.00	0.192	0.365	(B) BRAF Class 3 Melanoma
PIK3C3	18q12.3	5	1.07	2	3.17	0.196	0.372	(B) BRAF Class 3 Melanoma
PAK1	11q13.5-q14.1	5	1.13	2	3.33	0.198	0.374	(B) BRAF Class 3 Melanoma
AURKA	20q13.2	9	1.16	3	2.56	0.201	0.38	(B) BRAF Class 3 Melanoma
CCND1	11q13.3	9	1.12	3	2.46	0.203	0.382	(B) BRAF Class 3 Melanoma
PAX8	2q14.1	6	2.64	2	7.41	0.204	0.384	(B) BRAF Class 3 Melanoma
ARID5B	10q21.2	22	4.95	5	8.33	0.208	0.39	(B) BRAF Class 3 Melanoma
STAG1	3q22.3	6	2.79	2	7.69	0.209	0.391	(B) BRAF Class 3 Melanoma
GATA1	Xp11.23	5	0.94	2	2.67	0.211	0.393	(B) BRAF Class 3 Melanoma
QKI	6q26	5	1.08	2	3.03	0.213	0.396	(B) BRAF Class 3 Melanoma
KCNQ1	11p15.5-p15.4	10	4.98	3	10.34	0.216	0.401	(B) BRAF Class 3 Melanoma
RAD51	15q15.1	5	0.66	2	1.83	0.218	0.404	(B) BRAF Class 3 Melanoma
MYBL1	8q13.1	4	1.31	2	3.77	0.218	0.404	(B) BRAF Class 3 Melanoma
ETV4	17q21.31	5	1.02	2	2.82	0.219	0.404	(B) BRAF Class 3 Melanoma
RAD51D	17q12	5	0.67	2	1.83	0.219	0.404	(B) BRAF Class 3 Melanoma
SH2B3	12q24.12	20	2.67	5	4.42	0.222	0.408	(B) BRAF Class 3 Melanoma
DNAJB1	19p13.12	1	0.22	1	1.67	0.223	0.41	(B) BRAF Class 3 Melanoma
CD274	9p24.1	5	0.66	2	1.77	0.226	0.414	(B) BRAF Class 3 Melanoma
SDHA	5p15.33	27	3.63	6	5.61	0.226	0.414	(B) BRAF Class 3 Melanoma
SMO	7q32.1	39	3.51	8	5.03	0.227	0.414	(B) BRAF Class 3 Melanoma
WWTR1	3q25.1	1	0.51	1	3.70	0.229	0.417	(B) BRAF Class 3 Melanoma
RAD52	12p13.33	1	0.15	1	1.09	0.231	0.419	(B) BRAF Class 3 Melanoma
ERF	19q13.2	1	0.58	1	4.17	0.232	0.419	(B) BRAF Class 3 Melanoma
SESN3	11q21	1	0.58	1	4.17	0.232	0.419	(B) BRAF Class 3 Melanoma
AXIN1	16p13.3	11	2.09	3	4.17	0.232	0.419	(B) BRAF Class 3 Melanoma
MYD88	3p22.2	10	1.23	3	2.46	0.234	0.422	(B) BRAF Class 3 Melanoma
SDHAF2	11q12.2	1	0.15	1	1.02	0.235	0.424	(B) BRAF Class 3 Melanoma
CAMK1	3p25.3	1	0.08	1	0.58	0.237	0.424	(B) BRAF Class 3 Melanoma
ENG	9q34.11	1	0.50	1	3.45	0.237	0.424	(B) BRAF Class 3 Melanoma
KLF2	19p13.11	1	0.50	1	3.45	0.237	0.424	(B) BRAF Class 3 Melanoma
NT5C2	10q24.32-q24.33	5	1.84	2	4.76	0.238	0.424	(B) BRAF Class 3 Melanoma
CRKL	22q11.21	10	1.29	3	2.56	0.238	0.424	(B) BRAF Class 3 Melanoma
RARA	17q21.2	10	1.29	3	2.56	0.238	0.424	(B) BRAF Class 3 Melanoma
PHF6	Xq26.2	1	0.21	1	1.45	0.239	0.425	(B) BRAF Class 3 Melanoma
HNRNPK	9q21.32	2	1.06	1	5.56	0.241	0.427	(B) BRAF Class 3 Melanoma
PRKCI	3q26.2	16	2.56	4	4.40	0.241	0.427	(B) BRAF Class 3 Melanoma
FGF23	12p13.32	6	2.08	2	5.13	0.244	0.43	(B) BRAF Class 3 Melanoma
PLAG1	8q12.1	1	1.16	1	7.69	0.247	0.434	(B) BRAF Class 3 Melanoma
SOX10	22q13.1	6	2.16	2	5.26	0.248	0.436	(B) BRAF Class 3 Melanoma
PRPF8	17p13.3	1	1.04	1	6.67	0.253	0.444	(B) BRAF Class 3 Melanoma
MAP3K13	3q27.2	12	2.54	3	4.76	0.254	0.444	(B) BRAF Class 3 Melanoma
BUB1B	15q15.1	10	3.52	3	6.67	0.256	0.448	(B) BRAF Class 3 Melanoma
AGO2	8q24.3	6	3.51	2	8.33	0.256	0.448	(B) BRAF Class 3 Melanoma
NUP93	16q13	6	1.17	2	2.78	0.258	0.448	(B) BRAF Class 3 Melanoma
CDKN1C	11p15.4	1	0.36	1	2.27	0.258	0.448	(B) BRAF Class 3 Melanoma
CASR	3q13.33-q21.1	3	7.50	1	33.33	0.259	0.45	(B) BRAF Class 3 Melanoma
PAXIP1	7q36.2	6	2.99	2	6.90	0.266	0.461	(B) BRAF Class 3 Melanoma
FH	1q43	11	1.43	3	2.63	0.267	0.462	(B) BRAF Class 3 Melanoma
HDAC4	2q37.3	1	1.41	1	8.33	0.27	0.465	(B) BRAF Class 3 Melanoma
CDKN2B	9p21.3	113	14.04	20	16.53	0.272	0.469	(B) BRAF Class 3 Melanoma
PRKN	6q26	34	4.49	7	6.19	0.275	0.472	(B) BRAF Class 3 Melanoma
BTK	Xq22.1	12	2.09	3	3.75	0.275	0.472	(B) BRAF Class 3 Melanoma
CDK1	10q21.2	1	1.45	1	8.33	0.276	0.472	(B) BRAF Class 3 Melanoma
PRAME	22q11.22	1	1.45	1	8.33	0.276	0.472	(B) BRAF Class 3 Melanoma
NFKBIA	14q13.2	9	1.19	0	0.00	0.281	0.48	(A) BRAF Class 1 Melanoma
SOCS1	16p13.13	6	0.78	2	1.71	0.284	0.483	(B) BRAF Class 3 Melanoma
DHX15	4p15.2	3	1.89	1	7.14	0.289	0.49	(B) BRAF Class 3 Melanoma
ESR2	14q23.2-q23.3	1	0.93	1	5.00	0.289	0.49	(B) BRAF Class 3 Melanoma
PRSS8	16p11.2	2	0.86	1	3.57	0.29	0.49	(B) BRAF Class 3 Melanoma
RNF43	17q22	12	1.59	3	2.75	0.291	0.491	(B) BRAF Class 3 Melanoma
CTLA4	2q33.2	7	1.18	2	2.50	0.291	0.491	(B) BRAF Class 3 Melanoma
HIST1H3G	6p22.2	2	0.51	1	2.08	0.293	0.492	(B) BRAF Class 3 Melanoma
HIST1H3J	6p22.1	2	0.51	1	2.08	0.293	0.492	(B) BRAF Class 3 Melanoma
KMT2C	7q36.1	76	14.93	12	18.18	0.297	0.497	(B) BRAF Class 3 Melanoma
PTPRS	19p13.3	21	5.15	4	7.84	0.298	0.497	(B) BRAF Class 3 Melanoma
PML	15q24.1	9	3.86	0	0.00	0.298	0.497	(A) BRAF Class 1 Melanoma
INHA	2q35	8	2.04	2	4.17	0.298	0.497	(B) BRAF Class 3 Melanoma
ICOSLG	21q22.3	2	0.49	1	1.96	0.298	0.497	(B) BRAF Class 3 Melanoma
MYC	8q24.21	23	2.84	5	4.10	0.299	0.497	(B) BRAF Class 3 Melanoma
CHD2	15q26.1	14	5.30	3	8.82	0.304	0.505	(B) BRAF Class 3 Melanoma
INPPL1	11q13.4	7	4.09	2	8.33	0.306	0.507	(B) BRAF Class 3 Melanoma
SHQ1	3p13	8	1.96	2	3.92	0.307	0.507	(B) BRAF Class 3 Melanoma
PRDM1	6q21	53	6.86	10	8.55	0.308	0.507	(B) BRAF Class 3 Melanoma
IKBKE	1q32.1	7	1.30	2	2.63	0.308	0.507	(B) BRAF Class 3 Melanoma
BRD3	9q34.2	7	3.00	2	6.06	0.309	0.509	(B) BRAF Class 3 Melanoma
EPHB6	7q34	2	2.17	1	8.33	0.31	0.509	(B) BRAF Class 3 Melanoma
HIST1H3B	6p22.2	7	1.01	2	2.00	0.315	0.516	(B) BRAF Class 3 Melanoma
CTNNA1	5q31.2	7	1.48	2	2.94	0.315	0.516	(B) BRAF Class 3 Melanoma
PNKP	19q13.33	7	3.48	2	6.90	0.317	0.516	(B) BRAF Class 3 Melanoma
PDK1	2q31.1	2	0.69	1	2.56	0.317	0.516	(B) BRAF Class 3 Melanoma
BORCS8-MEF2B	19p13.11	7	0.59	2	1.17	0.317	0.516	(B) BRAF Class 3 Melanoma
CHEK2	22q12.1	18	2.23	4	3.31	0.319	0.518	(B) BRAF Class 3 Melanoma
NAV3	12q21.2	6	11.11	2	22.22	0.32	0.518	(B) BRAF Class 3 Melanoma
FOXA1	14q21.1	17	2.60	1	1.08	0.321	0.519	(A) BRAF Class 1 Melanoma
IGF2	11p15.5	7	0.99	2	1.92	0.323	0.522	(B) BRAF Class 3 Melanoma
MAPK1	22q11.22	7	0.93	2	1.82	0.324	0.522	(B) BRAF Class 3 Melanoma
RAC2	22q13.1	2	1.17	1	4.17	0.327	0.525	(B) BRAF Class 3 Melanoma
RXRA	9q34.2	2	1.17	1	4.17	0.327	0.525	(B) BRAF Class 3 Melanoma
TAP1	6p21.32	2	1.17	1	4.17	0.327	0.525	(B) BRAF Class 3 Melanoma
SMC1A	Xp11.22	2	0.73	1	2.56	0.329	0.526	(B) BRAF Class 3 Melanoma
WT1	11p13	24	3.07	5	4.24	0.329	0.526	(B) BRAF Class 3 Melanoma
TAL2	9q31.2	2	0.99	1	3.45	0.331	0.527	(B) BRAF Class 3 Melanoma
TLX3	5q35.1	2	0.99	1	3.45	0.331	0.527	(B) BRAF Class 3 Melanoma
CDK6	7q21.2	7	0.87	2	1.65	0.331	0.527	(B) BRAF Class 3 Melanoma
ZRSR2	Xp22.2	8	1.15	0	0.00	0.332	0.527	(A) BRAF Class 1 Melanoma
PNRC1	6q15	2	0.39	1	1.35	0.333	0.528	(B) BRAF Class 3 Melanoma
FAAP20	1p36.33	2	1.00	1	3.45	0.334	0.528	(B) BRAF Class 3 Melanoma
SMAD2	18q21.1	7	0.91	2	1.71	0.336	0.53	(B) BRAF Class 3 Melanoma
PARP1	1q42.12	8	1.61	2	2.99	0.336	0.53	(B) BRAF Class 3 Melanoma
NTHL1	16p13.3	2	0.53	1	1.79	0.341	0.537	(B) BRAF Class 3 Melanoma
CYSLTR2	13q14.2	2	0.96	1	3.23	0.342	0.537	(B) BRAF Class 3 Melanoma
BABAM1	19p13.11	2	0.56	1	1.89	0.343	0.537	(B) BRAF Class 3 Melanoma
CCND3	6p21.1	2	0.25	1	0.83	0.343	0.537	(B) BRAF Class 3 Melanoma
KNSTRN	15q15.1	15	6.20	1	2.70	0.346	0.54	(A) BRAF Class 1 Melanoma
PIK3R1	5q13.1	19	2.34	4	3.31	0.349	0.544	(B) BRAF Class 3 Melanoma
AXIN2	17q24.1	20	3.11	4	4.35	0.352	0.548	(B) BRAF Class 3 Melanoma
STK19	6p21.33	8	4.68	2	8.33	0.355	0.551	(B) BRAF Class 3 Melanoma
SS18	18q11.2	2	0.77	1	2.44	0.356	0.551	(B) BRAF Class 3 Melanoma
RASA1	5q14.3	14	2.23	3	3.37	0.356	0.551	(B) BRAF Class 3 Melanoma
BAP1	3p21.1	30	3.71	3	2.48	0.357	0.552	(A) BRAF Class 1 Melanoma
SBDS	7q11.21	2	0.70	1	2.22	0.358	0.552	(B) BRAF Class 3 Melanoma
CHD4	12p13.31	9	3.41	2	5.88	0.363	0.56	(B) BRAF Class 3 Melanoma
BCR	22q11.23	10	3.92	2	6.67	0.366	0.564	(B) BRAF Class 3 Melanoma
HIST1H3I	6p22.1	3	0.76	1	2.08	0.37	0.569	(B) BRAF Class 3 Melanoma
GRM8	7q31.33	4	9.30	1	25.00	0.372	0.571	(B) BRAF Class 3 Melanoma
U2AF1	21q22.3	8	1.00	2	1.69	0.374	0.572	(B) BRAF Class 3 Melanoma
STAT5A	17q21.2	3	0.73	1	1.96	0.375	0.572	(B) BRAF Class 3 Melanoma
SOS2	14q21.3	2	3.70	1	11.11	0.375	0.572	(B) BRAF Class 3 Melanoma
CRLF2	Xp22.33 and Yp11.2	14	1.87	3	2.73	0.376	0.572	(B) BRAF Class 3 Melanoma
TCF7L1	2p11.2	2	2.13	1	6.25	0.379	0.576	(B) BRAF Class 3 Melanoma
CDK5	7q36.1	2	2.90	1	8.33	0.386	0.584	(B) BRAF Class 3 Melanoma
FKBP9	7p14.3	2	2.90	1	8.33	0.386	0.584	(B) BRAF Class 3 Melanoma
GSTM5	1p13.3	2	2.90	1	8.33	0.386	0.584	(B) BRAF Class 3 Melanoma
FUS	16p11.2	7	2.26	2	3.77	0.387	0.585	(B) BRAF Class 3 Melanoma
WRN	8p12	18	5.63	4	7.41	0.395	0.596	(B) BRAF Class 3 Melanoma
B2M	15q21.1	22	3.30	2	2.08	0.399	0.601	(A) BRAF Class 1 Melanoma
CALR	19p13.13	7	1.07	0	0.00	0.4	0.602	(A) BRAF Class 1 Melanoma
KCNIP1	5q35.1	2	3.33	1	9.09	0.401	0.602	(B) BRAF Class 3 Melanoma
CDK4	12q14.1	28	3.47	3	2.46	0.403	0.604	(A) BRAF Class 1 Melanoma
EXT2	11p11.2	8	2.82	2	4.44	0.408	0.61	(B) BRAF Class 3 Melanoma
MSI1	12q24.31	3	1.75	1	4.17	0.411	0.614	(B) BRAF Class 3 Melanoma
TSHZ3	19q12	2	6.25	1	16.67	0.412	0.614	(B) BRAF Class 3 Melanoma
MT-ND5	-	3	0.25	1	0.58	0.418	0.619	(B) BRAF Class 3 Melanoma
DCLRE1C	10p13	3	1.49	1	3.45	0.419	0.619	(B) BRAF Class 3 Melanoma
GBA	1q22	3	1.49	1	3.45	0.419	0.619	(B) BRAF Class 3 Melanoma
HMBS	11q23.3	3	1.49	1	3.45	0.419	0.619	(B) BRAF Class 3 Melanoma
MUS81	11q13.1	3	1.49	1	3.45	0.419	0.619	(B) BRAF Class 3 Melanoma
NEIL1	15q24.2	3	1.49	1	3.45	0.419	0.619	(B) BRAF Class 3 Melanoma
POLH	6p21.1	3	1.38	1	3.13	0.424	0.625	(B) BRAF Class 3 Melanoma
MSH3	5q14.1	10	2.66	2	3.92	0.431	0.634	(B) BRAF Class 3 Melanoma
AURKB	17p13.1	9	1.16	2	1.71	0.435	0.638	(B) BRAF Class 3 Melanoma
CD276	15q24.1	7	1.72	0	0.00	0.436	0.638	(A) BRAF Class 1 Melanoma
LATS1	6q25.1	7	1.72	0	0.00	0.436	0.638	(A) BRAF Class 1 Melanoma
LIG4	13q33.3	6	2.99	0	0.00	0.441	0.645	(A) BRAF Class 1 Melanoma
ELANE	19p13.3	6	2.69	0	0.00	0.443	0.647	(A) BRAF Class 1 Melanoma
FANCL	2p16.1	6	1.27	0	0.00	0.444	0.647	(A) BRAF Class 1 Melanoma
FOXL2	3q22.3	6	0.79	0	0.00	0.445	0.647	(A) BRAF Class 1 Melanoma
RPS6KB2	11q13.2	4	0.98	1	1.96	0.447	0.647	(B) BRAF Class 3 Melanoma
RYBP	3p13	4	0.98	1	1.96	0.447	0.647	(B) BRAF Class 3 Melanoma
CASP8	2q33.1	10	1.42	2	2.02	0.447	0.647	(B) BRAF Class 3 Melanoma
MAP3K4	6q26	6	3.77	1	7.14	0.452	0.654	(B) BRAF Class 3 Melanoma
PIM1	6p21.2	10	1.48	2	2.06	0.457	0.66	(B) BRAF Class 3 Melanoma
IGF2R	6q25.3	3	2.34	1	4.76	0.459	0.662	(B) BRAF Class 3 Melanoma
ASXL2	2p23.3	25	5.63	4	6.67	0.461	0.663	(B) BRAF Class 3 Melanoma
RAD54B	8q22.1	10	4.98	2	6.90	0.462	0.663	(B) BRAF Class 3 Melanoma
KLF4	9q31.2	17	2.63	3	3.26	0.464	0.666	(B) BRAF Class 3 Melanoma
FGF10	5p12	6	2.08	0	0.00	0.465	0.666	(A) BRAF Class 1 Melanoma
IDH1	2q34	41	3.47	5	2.92	0.466	0.666	(A) BRAF Class 1 Melanoma
SIN3A	15q24.2	3	5.56	1	11.11	0.469	0.67	(B) BRAF Class 3 Melanoma
DMD	Xp21.2-p21.1	3	4.35	1	8.33	0.48	0.684	(B) BRAF Class 3 Melanoma
AKT2	19q13.2	12	1.48	1	0.83	0.481	0.684	(A) BRAF Class 1 Melanoma
GABRA6	5q34	7	2.93	0	0.00	0.481	0.684	(A) BRAF Class 1 Melanoma
NKX2-1	14q13.3	10	1.29	2	1.71	0.482	0.684	(B) BRAF Class 3 Melanoma
XRCC5	2q35	4	1.97	1	3.45	0.49	0.695	(B) BRAF Class 3 Melanoma
SLC25A13	7q21.3	4	1.99	1	3.45	0.494	0.698	(B) BRAF Class 3 Melanoma
STAT6	12q13.3	9	2.90	2	3.77	0.495	0.699	(B) BRAF Class 3 Melanoma
ID3	1p36.12	4	0.57	1	0.97	0.496	0.7	(B) BRAF Class 3 Melanoma
RAB35	12q24.23	5	1.27	1	2.08	0.501	0.706	(B) BRAF Class 3 Melanoma
SLC34A2	4p15.2	11	4.78	2	6.06	0.503	0.707	(B) BRAF Class 3 Melanoma
ERCC4	16p13.12	18	2.47	3	2.86	0.505	0.709	(B) BRAF Class 3 Melanoma
MBD4	3q21.3	5	2.49	0	0.00	0.506	0.71	(A) BRAF Class 1 Melanoma
VTCN1	1p13.1-p12	5	1.23	1	1.96	0.509	0.711	(B) BRAF Class 3 Melanoma
XIAP	Xq25	5	1.23	1	1.96	0.509	0.711	(B) BRAF Class 3 Melanoma
MAP2K1	15q22.31	50	5.68	7	5.22	0.513	0.714	(A) BRAF Class 1 Melanoma
DPYD	1p21.3	4	3.81	1	6.25	0.514	0.714	(B) BRAF Class 3 Melanoma
TNFRSF14	1p36.32	5	0.93	0	0.00	0.515	0.714	(A) BRAF Class 1 Melanoma
ACVR1B	12q13.13	5	1.82	1	2.86	0.516	0.714	(B) BRAF Class 3 Melanoma
CTNNB1	3p22.1	67	5.66	10	5.85	0.516	0.714	(B) BRAF Class 3 Melanoma
XRCC2	7q36.1	12	1.82	2	2.22	0.516	0.714	(B) BRAF Class 3 Melanoma
ZMYM3	Xq13.1	4	5.63	0	0.00	0.529	0.731	(A) BRAF Class 1 Melanoma
CLDN18	3q22.3	4	7.41	0	0.00	0.531	0.732	(A) BRAF Class 1 Melanoma
CYLD	16q12.1	18	2.70	3	3.00	0.531	0.732	(B) BRAF Class 3 Melanoma
JUN	1p32.1	5	0.99	0	0.00	0.534	0.733	(A) BRAF Class 1 Melanoma
FGF4	11q13.3	12	2.23	2	2.63	0.534	0.733	(B) BRAF Class 3 Melanoma
EMSY	11q13.5	5	1.73	1	2.56	0.535	0.733	(B) BRAF Class 3 Melanoma
FGF6	12p13.32	5	1.73	1	2.56	0.535	0.733	(B) BRAF Class 3 Melanoma
HLA-A	6p22.1	5	1.12	0	0.00	0.537	0.734	(A) BRAF Class 1 Melanoma
KDM6B	17p13.1	4	5.41	1	8.33	0.537	0.734	(B) BRAF Class 3 Melanoma
GREM1	15q13.3	5	0.74	1	1.06	0.542	0.739	(B) BRAF Class 3 Melanoma
HIST1H1C	6p22.2	5	1.18	0	0.00	0.548	0.746	(A) BRAF Class 1 Melanoma
TRAF3	14q32.32	4	1.53	0	0.00	0.549	0.746	(A) BRAF Class 1 Melanoma
ETV5	3q27.2	12	2.46	2	2.82	0.549	0.746	(B) BRAF Class 3 Melanoma
BRCC3	Xq28	5	2.43	1	3.45	0.55	0.746	(B) BRAF Class 3 Melanoma
FGF19	11q13.3	11	1.92	1	1.25	0.556	0.753	(A) BRAF Class 1 Melanoma
FAH	15q25.1	5	2.49	1	3.45	0.559	0.755	(B) BRAF Class 3 Melanoma
MAPK3	16p11.2	5	1.27	0	0.00	0.56	0.756	(A) BRAF Class 1 Melanoma
PLK2	5q11.2	6	1.47	1	1.96	0.564	0.76	(B) BRAF Class 3 Melanoma
PPP6C	9q33.3	37	8.49	5	8.62	0.565	0.76	(B) BRAF Class 3 Melanoma
BCL2L1	20q11.21	5	0.66	1	0.88	0.568	0.763	(B) BRAF Class 3 Melanoma
MAP2K4	17p12	10	1.24	1	0.83	0.569	0.763	(A) BRAF Class 1 Melanoma
KEL	7q34	22	9.21	2	7.69	0.574	0.768	(A) BRAF Class 1 Melanoma
HFE	6p22.2	4	1.99	0	0.00	0.581	0.777	(A) BRAF Class 1 Melanoma
SDHC	1q23.3	4	0.53	0	0.00	0.585	0.781	(A) BRAF Class 1 Melanoma
RPA1	17p13.3	5	1.96	1	2.50	0.586	0.782	(B) BRAF Class 3 Melanoma
CTCF	16q22.1	13	1.80	2	1.90	0.588	0.783	(B) BRAF Class 3 Melanoma
DUSP4	8p12	5	2.42	1	3.03	0.592	0.787	(B) BRAF Class 3 Melanoma
ELF3	1q32.1	5	2.42	1	3.03	0.592	0.787	(B) BRAF Class 3 Melanoma
HSD3B1	1p12	5	2.09	0	0.00	0.594	0.788	(A) BRAF Class 1 Melanoma
CCN6	6q21	6	2.16	1	2.63	0.596	0.789	(B) BRAF Class 3 Melanoma
DEPDC5	22q12.2-q12.3	3	5.00	0	0.00	0.599	0.791	(A) BRAF Class 1 Melanoma
ARFRP1	20q13.33	4	1.39	0	0.00	0.599	0.791	(A) BRAF Class 1 Melanoma
NKX3-1	8p21.2	4	0.68	0	0.00	0.601	0.792	(A) BRAF Class 1 Melanoma
BIRC3	11q22.2	7	1.67	1	1.92	0.61	0.802	(B) BRAF Class 3 Melanoma
NPM1	5q35.1	6	0.56	1	0.65	0.61	0.802	(B) BRAF Class 3 Melanoma
INPP4A	2q11.2	7	1.72	1	1.96	0.613	0.804	(B) BRAF Class 3 Melanoma
DIS3L2	2q37.1	6	2.69	1	3.13	0.614	0.804	(B) BRAF Class 3 Melanoma
MDM4	1q32.1	15	1.86	2	1.65	0.615	0.804	(A) BRAF Class 1 Melanoma
HELQ	4q21.23	6	2.99	1	3.45	0.616	0.804	(B) BRAF Class 3 Melanoma
TDG	12q23.3	6	2.99	1	3.45	0.616	0.804	(B) BRAF Class 3 Melanoma
RHEB	7q36.1	6	0.87	1	0.99	0.618	0.805	(B) BRAF Class 3 Melanoma
PTPRK	6q22.33	5	9.26	1	11.11	0.62	0.807	(B) BRAF Class 3 Melanoma
SMC3	10q25.2	9	1.97	1	1.47	0.622	0.808	(A) BRAF Class 1 Melanoma
IL10	1q32.1	4	0.98	0	0.00	0.623	0.808	(A) BRAF Class 1 Melanoma
PIK3R3	1p34.1	4	0.98	0	0.00	0.623	0.808	(A) BRAF Class 1 Melanoma
RANBP2	2q13	20	8.77	2	8.00	0.627	0.811	(A) BRAF Class 1 Melanoma
GPS2	17p13.1	4	1.00	0	0.00	0.629	0.812	(A) BRAF Class 1 Melanoma
HIST1H3E	6p22.2	4	1.02	0	0.00	0.63	0.812	(A) BRAF Class 1 Melanoma
ERCC6	10q11.23	9	4.48	1	3.45	0.634	0.815	(A) BRAF Class 1 Melanoma
FAAP100	17q25.3	9	4.48	1	3.45	0.634	0.815	(A) BRAF Class 1 Melanoma
HIST1H3C	6p22.2	7	1.17	1	1.25	0.636	0.817	(B) BRAF Class 3 Melanoma
MYH9	22q12.3	3	3.70	0	0.00	0.637	0.817	(A) BRAF Class 1 Melanoma
JAZF1	7p15.2-p15.1	3	1.17	0	0.00	0.639	0.817	(A) BRAF Class 1 Melanoma
FGF7	15q21.2	4	1.88	0	0.00	0.64	0.817	(A) BRAF Class 1 Melanoma
RNF213	17q25.3	5	11.11	0	0.00	0.641	0.817	(A) BRAF Class 1 Melanoma
ZNF703	8p11.23	7	2.42	1	2.56	0.641	0.817	(B) BRAF Class 3 Melanoma
ZNF217	20q13.2	14	2.68	2	2.50	0.642	0.817	(A) BRAF Class 1 Melanoma
SF1	11q13.1	3	3.13	0	0.00	0.644	0.82	(A) BRAF Class 1 Melanoma
RPS6KA4	11q13.1	10	2.45	1	1.96	0.65	0.825	(A) BRAF Class 1 Melanoma
EIF1AX	Xp22.12	7	1.53	1	1.56	0.651	0.826	(B) BRAF Class 3 Melanoma
BRINP3	1q31.1	5	10.64	0	0.00	0.653	0.827	(A) BRAF Class 1 Melanoma
RELA	11q13.1	6	2.36	1	2.44	0.653	0.827	(B) BRAF Class 3 Melanoma
AKT3	1q43-q44	14	1.73	2	1.65	0.655	0.827	(A) BRAF Class 1 Melanoma
YAP1	11q22.1	7	1.12	1	1.12	0.656	0.828	(B) BRAF Class 3 Melanoma
VHL	3p25.3	7	0.65	1	0.65	0.658	0.828	(B) BRAF Class 3 Melanoma
ERRFI1	1p36.23	9	1.77	1	1.45	0.66	0.83	(A) BRAF Class 1 Melanoma
H3F3A	1q42.12	3	0.38	0	0.00	0.661	0.83	(A) BRAF Class 1 Melanoma
CBFB	16q22.1	3	0.42	0	0.00	0.663	0.832	(A) BRAF Class 1 Melanoma
DKC1	Xq28	3	1.49	0	0.00	0.666	0.834	(A) BRAF Class 1 Melanoma
IKZF3	17q12-q21.1	5	4.10	1	4.17	0.667	0.834	(B) BRAF Class 3 Melanoma
PPP4R2	3p13	3	1.75	0	0.00	0.673	0.841	(A) BRAF Class 1 Melanoma
FANCB	Xp22.2	8	3.64	1	3.13	0.68	0.848	(A) BRAF Class 1 Melanoma
RAD51C	17q22	8	1.07	1	0.92	0.681	0.848	(A) BRAF Class 1 Melanoma
TOP2A	17q21.2	9	3.41	1	2.94	0.681	0.848	(A) BRAF Class 1 Melanoma
TMEM127	2q11.2	3	0.49	0	0.00	0.683	0.848	(A) BRAF Class 1 Melanoma
KLLN	10q23.31	8	3.98	1	3.45	0.683	0.848	(A) BRAF Class 1 Melanoma
SMARCD1	12q13.12	3	0.65	0	0.00	0.685	0.849	(A) BRAF Class 1 Melanoma
RAD54L	1p34.1	3	0.63	0	0.00	0.687	0.85	(A) BRAF Class 1 Melanoma
RHOA	3p21.31	8	1.18	1	1.04	0.691	0.854	(A) BRAF Class 1 Melanoma
MYOD1	11p15.1	3	0.70	0	0.00	0.701	0.865	(A) BRAF Class 1 Melanoma
BCL2L11	2q13	3	0.73	0	0.00	0.703	0.867	(A) BRAF Class 1 Melanoma
CENPA	2p23.3	3	0.76	0	0.00	0.707	0.868	(A) BRAF Class 1 Melanoma
EIF4E	4q23	3	0.76	0	0.00	0.707	0.868	(A) BRAF Class 1 Melanoma
HIST1H3D	6p22.2	3	0.76	0	0.00	0.707	0.868	(A) BRAF Class 1 Melanoma
ANKRD26	10p12.1	4	2.52	0	0.00	0.711	0.872	(A) BRAF Class 1 Melanoma
NFE2L2	2q31.2	7	0.87	1	0.83	0.72	0.882	(A) BRAF Class 1 Melanoma
LMO1	11p15.4	7	0.97	1	0.94	0.725	0.887	(A) BRAF Class 1 Melanoma
HSP90AA1	14q32.31	3	1.26	0	0.00	0.732	0.891	(A) BRAF Class 1 Melanoma
CHD1	5q15-q21.1	2	3.70	0	0.00	0.733	0.891	(A) BRAF Class 1 Melanoma
TTYH1	19q13.42	2	3.70	0	0.00	0.733	0.891	(A) BRAF Class 1 Melanoma
ZBTB20	3q13.31	2	3.70	0	0.00	0.733	0.891	(A) BRAF Class 1 Melanoma
TRIM37	17q22	7	3.48	1	3.45	0.734	0.891	(A) BRAF Class 1 Melanoma
XPA	9q22.33	2	0.70	0	0.00	0.745	0.903	(A) BRAF Class 1 Melanoma
XRCC3	14q32.33	2	0.78	0	0.00	0.747	0.905	(A) BRAF Class 1 Melanoma
SDHD	11q23.1	2	0.26	0	0.00	0.758	0.917	(A) BRAF Class 1 Melanoma
EP400	12q24.33	3	6.98	0	0.00	0.761	0.918	(A) BRAF Class 1 Melanoma
RPS6KA2	6q27	3	6.98	0	0.00	0.761	0.918	(A) BRAF Class 1 Melanoma
OGG1	3p25.3	2	1.00	0	0.00	0.763	0.919	(A) BRAF Class 1 Melanoma
H19	11p15.5	2	0.17	0	0.00	0.763	0.919	(A) BRAF Class 1 Melanoma
CARM1	19p13.2	2	1.17	0	0.00	0.768	0.921	(A) BRAF Class 1 Melanoma
NUF2	1q23.3	2	1.17	0	0.00	0.768	0.921	(A) BRAF Class 1 Melanoma
SESN1	6q21	2	1.17	0	0.00	0.768	0.921	(A) BRAF Class 1 Melanoma
PPP2R2A	8p21.2	3	1.76	0	0.00	0.775	0.926	(A) BRAF Class 1 Melanoma
FGF1	5q31.3	3	1.89	0	0.00	0.775	0.926	(A) BRAF Class 1 Melanoma
FGF9	13q12.11	3	1.89	0	0.00	0.775	0.926	(A) BRAF Class 1 Melanoma
MAX	14q23.3	2	0.31	0	0.00	0.778	0.927	(A) BRAF Class 1 Melanoma
LTK	15q15.1	2	1.94	0	0.00	0.788	0.937	(A) BRAF Class 1 Melanoma
BBC3	19q13.32	2	0.49	0	0.00	0.79	0.937	(A) BRAF Class 1 Melanoma
HIST1H2BD	6p22.2	2	0.49	0	0.00	0.79	0.937	(A) BRAF Class 1 Melanoma
TGFBR1	9q22.33	2	0.49	0	0.00	0.79	0.937	(A) BRAF Class 1 Melanoma
HIST1H3A	6p22.2	2	0.51	0	0.00	0.794	0.938	(A) BRAF Class 1 Melanoma
HIST1H3F	6p22.2	2	0.51	0	0.00	0.794	0.938	(A) BRAF Class 1 Melanoma
DDX41	5q35.3	2	1.03	0	0.00	0.8	0.938	(A) BRAF Class 1 Melanoma
SAMD9	7q21.2	2	3.08	0	0.00	0.814	0.938	(A) BRAF Class 1 Melanoma
NLRP1	17p13.2	2	4.65	0	0.00	0.835	0.938	(A) BRAF Class 1 Melanoma
KIF5B	10p11.22	2	1.09	0	0.00	0.837	0.938	(A) BRAF Class 1 Melanoma
CDH11	16q21	2	4.44	0	0.00	0.842	0.938	(A) BRAF Class 1 Melanoma
NIN	14q22.1	2	4.44	0	0.00	0.842	0.938	(A) BRAF Class 1 Melanoma
APOBEC3G	22q13.1	1	3.13	0	0.00	0.842	0.938	(A) BRAF Class 1 Melanoma
HSPA5	9q33.3	1	3.13	0	0.00	0.842	0.938	(A) BRAF Class 1 Melanoma
USP7	16p13.2	1	3.13	0	0.00	0.842	0.938	(A) BRAF Class 1 Melanoma
RPS6KB1	17q23.1	2	1.26	0	0.00	0.844	0.938	(A) BRAF Class 1 Melanoma
ZBTB7A	19p13.3	2	1.26	0	0.00	0.844	0.938	(A) BRAF Class 1 Melanoma
RACK1	5q35.3	1	1.67	0	0.00	0.845	0.938	(A) BRAF Class 1 Melanoma
CDK9	9q34.11	1	1.45	0	0.00	0.852	0.938	(A) BRAF Class 1 Melanoma
CRTC2	1q21.3	1	1.45	0	0.00	0.852	0.938	(A) BRAF Class 1 Melanoma
PSMD13	11p15.5	1	1.45	0	0.00	0.852	0.938	(A) BRAF Class 1 Melanoma
MAP3K2	2q14.3	1	1.85	0	0.00	0.857	0.938	(A) BRAF Class 1 Melanoma
MGMT	10q26.3	1	1.85	0	0.00	0.857	0.938	(A) BRAF Class 1 Melanoma
HSP90AB1	6p21.1	1	1.27	0	0.00	0.859	0.938	(A) BRAF Class 1 Melanoma
MAP3K7	6q15	1	1.27	0	0.00	0.859	0.938	(A) BRAF Class 1 Melanoma
RPL10	Xq28	1	2.70	0	0.00	0.86	0.938	(A) BRAF Class 1 Melanoma
CDC42	1p36.12	1	0.48	0	0.00	0.863	0.938	(A) BRAF Class 1 Melanoma
SAMD9L	7q21.2	2	5.00	0	0.00	0.864	0.938	(A) BRAF Class 1 Melanoma
FANCF	11p14.3	1	0.19	0	0.00	0.868	0.938	(A) BRAF Class 1 Melanoma
UGT1A1	2q37.1	1	0.95	0	0.00	0.868	0.938	(A) BRAF Class 1 Melanoma
SDHB	1p36.13	1	0.13	0	0.00	0.871	0.938	(A) BRAF Class 1 Melanoma
CNOT3	19q13.42	1	1.64	0	0.00	0.871	0.938	(A) BRAF Class 1 Melanoma
ABCA17P	16p13.3	1	0.08	0	0.00	0.874	0.938	(A) BRAF Class 1 Melanoma
ABR	17p13.3	1	0.08	0	0.00	0.874	0.938	(A) BRAF Class 1 Melanoma
ARHGAP4	Xq28	1	0.08	0	0.00	0.874	0.938	(A) BRAF Class 1 Melanoma
ARSB	5q14.1	1	0.08	0	0.00	0.874	0.938	(A) BRAF Class 1 Melanoma
C2ORF83	2q36.3	1	0.08	0	0.00	0.874	0.938	(A) BRAF Class 1 Melanoma
CASZ1	1p36.22	1	0.08	0	0.00	0.874	0.938	(A) BRAF Class 1 Melanoma
CTDSP1	2q35	1	0.08	0	0.00	0.874	0.938	(A) BRAF Class 1 Melanoma
DDAH1	1p22.3	1	0.08	0	0.00	0.874	0.938	(A) BRAF Class 1 Melanoma
DEF8	16q24.3	1	0.08	0	0.00	0.874	0.938	(A) BRAF Class 1 Melanoma
DENND4C	9p22.1	1	0.08	0	0.00	0.874	0.938	(A) BRAF Class 1 Melanoma
DHRSX	Xp22.33 and Yp11.2	1	0.08	0	0.00	0.874	0.938	(A) BRAF Class 1 Melanoma
GALNT11	7q36.1|7q36.1	1	0.08	0	0.00	0.874	0.938	(A) BRAF Class 1 Melanoma
GRIA1	5q33.2	1	0.08	0	0.00	0.874	0.938	(A) BRAF Class 1 Melanoma
GRIK1	21q21.3	1	0.08	0	0.00	0.874	0.938	(A) BRAF Class 1 Melanoma
HECTD4	12q24.13	1	0.08	0	0.00	0.874	0.938	(A) BRAF Class 1 Melanoma
HSD17B6	12q13.3	1	0.08	0	0.00	0.874	0.938	(A) BRAF Class 1 Melanoma
LOC105374464	2p22.2	1	0.08	0	0.00	0.874	0.938	(A) BRAF Class 1 Melanoma
MYO1D	17q11.2	1	0.08	0	0.00	0.874	0.938	(A) BRAF Class 1 Melanoma
MYSM1	1p32.1	1	0.08	0	0.00	0.874	0.938	(A) BRAF Class 1 Melanoma
PADI2	1p36.13	1	0.08	0	0.00	0.874	0.938	(A) BRAF Class 1 Melanoma
PAX9	14q13.3	1	0.08	0	0.00	0.874	0.938	(A) BRAF Class 1 Melanoma
PFKFB4	3p21.31	1	0.08	0	0.00	0.874	0.938	(A) BRAF Class 1 Melanoma
PLVAP	19p13.11	1	0.08	0	0.00	0.874	0.938	(A) BRAF Class 1 Melanoma
PNPLA6	19p13.2	1	0.08	0	0.00	0.874	0.938	(A) BRAF Class 1 Melanoma
PRMT6	1p13.3	1	0.08	0	0.00	0.874	0.938	(A) BRAF Class 1 Melanoma
RAB2A	8q12.1-q12.2	1	0.08	0	0.00	0.874	0.938	(A) BRAF Class 1 Melanoma
SAE1	19q13.32	1	0.08	0	0.00	0.874	0.938	(A) BRAF Class 1 Melanoma
SCARA5	8p21.1	1	0.08	0	0.00	0.874	0.938	(A) BRAF Class 1 Melanoma
SDCCAG8	1q43-q44	1	0.08	0	0.00	0.874	0.938	(A) BRAF Class 1 Melanoma
SEMA6D	15q21.1	1	0.08	0	0.00	0.874	0.938	(A) BRAF Class 1 Melanoma
SIK3	11q23.3	1	0.08	0	0.00	0.874	0.938	(A) BRAF Class 1 Melanoma
TRAJ42	14q11.2	1	0.08	0	0.00	0.874	0.938	(A) BRAF Class 1 Melanoma
UGT1A6	2q37.1	1	0.08	0	0.00	0.874	0.938	(A) BRAF Class 1 Melanoma
ZNF423	16q12.1	1	0.08	0	0.00	0.874	0.938	(A) BRAF Class 1 Melanoma
EME1	17q21.33	1	0.50	0	0.00	0.874	0.938	(A) BRAF Class 1 Melanoma
FAAP24	19q13.11	1	0.50	0	0.00	0.874	0.938	(A) BRAF Class 1 Melanoma
ID4	6p22.3	1	0.50	0	0.00	0.874	0.938	(A) BRAF Class 1 Melanoma
UBE2T	1q32.1	1	0.50	0	0.00	0.874	0.938	(A) BRAF Class 1 Melanoma
PRKD1	14q12	1	0.53	0	0.00	0.874	0.938	(A) BRAF Class 1 Melanoma
PTP4A1	6q12	1	0.58	0	0.00	0.877	0.938	(A) BRAF Class 1 Melanoma
KMT5A	12q24.31	1	0.58	0	0.00	0.878	0.938	(A) BRAF Class 1 Melanoma
ERCC1	19q13.32	1	0.26	0	0.00	0.878	0.938	(A) BRAF Class 1 Melanoma
SMARCE1	17q21.2	1	0.43	0	0.00	0.879	0.938	(A) BRAF Class 1 Melanoma
BTG1	12q21.33	1	0.36	0	0.00	0.88	0.938	(A) BRAF Class 1 Melanoma
GNA13	17q24.1	1	0.34	0	0.00	0.883	0.938	(A) BRAF Class 1 Melanoma
CDH20	18q21.33	1	1.09	0	0.00	0.885	0.938	(A) BRAF Class 1 Melanoma
EPHB4	7q22.1	1	0.80	0	0.00	0.887	0.938	(A) BRAF Class 1 Melanoma
DCUN1D1	3q26.33	1	0.25	0	0.00	0.887	0.938	(A) BRAF Class 1 Melanoma
PDPK1	16p13.3	1	0.23	0	0.00	0.888	0.938	(A) BRAF Class 1 Melanoma
PMAIP1	18q21.32	1	0.25	0	0.00	0.889	0.938	(A) BRAF Class 1 Melanoma
HIST2H3D	1q21.2	1	0.26	0	0.00	0.89	0.938	(A) BRAF Class 1 Melanoma
HIST1H3H	6p22.1	1	0.25	0	0.00	0.891	0.938	(A) BRAF Class 1 Melanoma
HIST2H3C	1q21.2	1	0.25	0	0.00	0.891	0.938	(A) BRAF Class 1 Melanoma
PHLPP2	16q22.2	1	1.35	0	0.00	0.892	0.938	(A) BRAF Class 1 Melanoma
PAX3	2q36.1	1	0.45	0	0.00	0.892	0.938	(A) BRAF Class 1 Melanoma
DDR1	6p21.33	1	1.00	0	0.00	0.893	0.938	(A) BRAF Class 1 Melanoma
SRP19	5q22.2	1	0.69	0	0.00	0.895	0.938	(A) BRAF Class 1 Melanoma
TYRO3	15q15.1	1	1.28	0	0.00	0.897	0.938	(A) BRAF Class 1 Melanoma
ZBTB2	6q25.1	1	0.44	0	0.00	0.901	0.938	(A) BRAF Class 1 Melanoma
ETNK1	12p12.1	1	1.75	0	0.00	0.905	0.938	(A) BRAF Class 1 Melanoma
CAMTA1	1p36.31-p36.23	1	1.69	0	0.00	0.908	0.938	(A) BRAF Class 1 Melanoma
NR4A3	9q31.1	1	1.69	0	0.00	0.908	0.938	(A) BRAF Class 1 Melanoma
LAMP1	13q34	1	0.54	0	0.00	0.911	0.938	(A) BRAF Class 1 Melanoma
TCF12	15q21.3	1	1.39	0	0.00	0.911	0.938	(A) BRAF Class 1 Melanoma
NCOR2	12q24.31	1	2.38	0	0.00	0.913	0.938	(A) BRAF Class 1 Melanoma
AURKC	19q13.43	1	2.33	0	0.00	0.915	0.938	(A) BRAF Class 1 Melanoma
CSMD3	8q23.3	1	2.33	0	0.00	0.915	0.938	(A) BRAF Class 1 Melanoma
CYP2C19	10q23.33	1	2.33	0	0.00	0.915	0.938	(A) BRAF Class 1 Melanoma
DST	6p12.1	1	2.33	0	0.00	0.915	0.938	(A) BRAF Class 1 Melanoma
FN1	2q35	1	2.33	0	0.00	0.915	0.938	(A) BRAF Class 1 Melanoma
FOXP4	6p21.1	1	2.33	0	0.00	0.915	0.938	(A) BRAF Class 1 Melanoma
GDNF	5p13.2	1	2.33	0	0.00	0.915	0.938	(A) BRAF Class 1 Melanoma
GUCY1A2	11q22.3	1	2.33	0	0.00	0.915	0.938	(A) BRAF Class 1 Melanoma
IKBKB	8p11.21	1	2.33	0	0.00	0.915	0.938	(A) BRAF Class 1 Melanoma
ITGA10	1q21.1	1	2.33	0	0.00	0.915	0.938	(A) BRAF Class 1 Melanoma
STK36	2q35	1	2.33	0	0.00	0.915	0.938	(A) BRAF Class 1 Melanoma
TNK2	3q29	1	2.33	0	0.00	0.915	0.938	(A) BRAF Class 1 Melanoma
TRIM24	7q33-q34	1	2.33	0	0.00	0.915	0.938	(A) BRAF Class 1 Melanoma
ASPSCR1	17q25.3	1	2.27	0	0.00	0.917	0.938	(A) BRAF Class 1 Melanoma
PRDM16	1p36.32	1	2.27	0	0.00	0.917	0.938	(A) BRAF Class 1 Melanoma
RBM15	1p13.3	1	2.27	0	0.00	0.917	0.938	(A) BRAF Class 1 Melanoma
ARNT	1q21.3	1	2.22	0	0.00	0.918	0.938	(A) BRAF Class 1 Melanoma
KNL1	15q15.1	1	2.22	0	0.00	0.918	0.938	(A) BRAF Class 1 Melanoma
NFKB2	10q24.32	1	2.22	0	0.00	0.918	0.938	(A) BRAF Class 1 Melanoma
PDE4DIP	1q21.2	1	2.22	0	0.00	0.918	0.938	(A) BRAF Class 1 Melanoma
PER1	17p13.1	1	2.22	0	0.00	0.918	0.938	(A) BRAF Class 1 Melanoma
TPR	1q31.1	1	2.22	0	0.00	0.918	0.938	(A) BRAF Class 1 Melanoma
ZNF384	12p13.31	1	2.22	0	0.00	0.918	0.938	(A) BRAF Class 1 Melanoma
CSNK1A1	5q32	1	0.63	0	0.00	0.919	0.938	(A) BRAF Class 1 Melanoma
FGF8	10q24.32	1	0.63	0	0.00	0.919	0.938	(A) BRAF Class 1 Melanoma
CD22	19q13.12	1	2.17	0	0.00	0.92	0.938	(A) BRAF Class 1 Melanoma
PDCD11	10q24.33	1	2.86	0	0.00	0.921	0.938	(A) BRAF Class 1 Melanoma
PCDHAC2	5q31.3	2	8.00	0	0.00	0.923	0.938	(A) BRAF Class 1 Melanoma
TGFB1	19q13.2	2	8.00	0	0.00	0.923	0.938	(A) BRAF Class 1 Melanoma
ADGRB3	6q12-q13	2	7.69	0	0.00	0.926	0.938	(A) BRAF Class 1 Melanoma
NUP214	9q34.13	1	2.00	0	0.00	0.926	0.938	(A) BRAF Class 1 Melanoma
UBR5	8q22.3	1	2.00	0	0.00	0.926	0.938	(A) BRAF Class 1 Melanoma
BEND2	Xp22.13	1	2.50	0	0.00	0.93	0.938	(A) BRAF Class 1 Melanoma
DDX31	9q34.13	1	2.50	0	0.00	0.93	0.938	(A) BRAF Class 1 Melanoma
FOSB	19q13.32	1	2.50	0	0.00	0.93	0.938	(A) BRAF Class 1 Melanoma
FRK	6q22.1	1	2.50	0	0.00	0.93	0.938	(A) BRAF Class 1 Melanoma
GLMN	1p22.1	1	2.50	0	0.00	0.93	0.938	(A) BRAF Class 1 Melanoma
OGA	10q24.32	1	2.50	0	0.00	0.93	0.938	(A) BRAF Class 1 Melanoma
OTX2	14q22.3	1	2.50	0	0.00	0.93	0.938	(A) BRAF Class 1 Melanoma
POLR2A	17p13.1	1	2.50	0	0.00	0.93	0.938	(A) BRAF Class 1 Melanoma
TBXT	6q27	1	2.50	0	0.00	0.93	0.938	(A) BRAF Class 1 Melanoma
ZFPM1	16q24.2	1	2.50	0	0.00	0.93	0.938	(A) BRAF Class 1 Melanoma
ECT2L	6q24.1	1	2.38	0	0.00	0.933	0.94	(A) BRAF Class 1 Melanoma
TBL1XR1	3q26.32	1	2.38	0	0.00	0.933	0.94	(A) BRAF Class 1 Melanoma
CACNA1E	1q25.3	1	4.00	0	0.00	0.962	0.964	(A) BRAF Class 1 Melanoma
GNAI3	1p13.3	1	4.00	0	0.00	0.962	0.964	(A) BRAF Class 1 Melanoma
SP140	2q37.1	1	4.00	0	0.00	0.962	0.964	(A) BRAF Class 1 Melanoma
UMODL1	21q22.3	1	4.00	0	0.00	0.962	0.964	(A) BRAF Class 1 Melanoma
RPL22	1p36.31	1	3.70	0	0.00	0.964	0.965	(A) BRAF Class 1 Melanoma
BRAF	7q34	1183	100.00	171	100.00	1	1	(B) BRAF Class 3 Melanoma

## Sheet: S10 Melanoma Class 1+3 Filtered
Table S10: Filtered Co-Mutations across BRAF Class 1 and 3 melanomas
Gene	Cytoband	Class 1 Occurrence	Class 1 %	Class 3 occurrence	Class 3 %	SumClass	pvalue	qvalue	Enriched In
TENT5C	1p12	17	2.20	8	6.84	25	0.011	0.0493	(B) BRAF Class 3 Melanoma
CDH1	16q22.1	18	1.67	8	5.19	26	0.0107	0.0483	(B) BRAF Class 3 Melanoma
INHBA	7p14.1	23	4.49	9	12.50	32	0.0106	0.0483	(B) BRAF Class 3 Melanoma
SLX4	16p13.3	29	5.47	10	14.08	39	0.0105	0.0481	(B) BRAF Class 3 Melanoma
FANCI	15q26.1	11	2.46	6	9.84	17	0.009962	0.0461	(B) BRAF Class 3 Melanoma
SMAD4	18q21.2	10	0.89	6	3.70	16	0.009732	0.0452	(B) BRAF Class 3 Melanoma
XPC	3p25.1	9	3.17	6	13.33	15	0.009062	0.043	(B) BRAF Class 3 Melanoma
ZFHX4	8q21.13	11	20.37	6	66.67	17	0.008836	0.0422	(B) BRAF Class 3 Melanoma
NSD2	4p16.3	12	2.80	7	10.45	19	0.008096	0.0397	(B) BRAF Class 3 Melanoma
PALB2	16p12.2	24	2.97	10	8.26	34	0.008157	0.0397	(B) BRAF Class 3 Melanoma
TCF7L2	10q25.2-q25.3	9	1.30	6	5.88	15	0.007453	0.0367	(B) BRAF Class 3 Melanoma
LYN	8q12.1	15	3.83	7	14.00	22	0.007009	0.0347	(B) BRAF Class 3 Melanoma
DNMT3B	20q11.21	11	2.70	6	11.76	17	0.006669	0.0334	(B) BRAF Class 3 Melanoma
AR	Xq12	31	3.84	12	9.84	43	0.006425	0.0325	(B) BRAF Class 3 Melanoma
FGFR3	4p16.3	32	2.70	12	7.02	44	0.006109	0.0313	(B) BRAF Class 3 Melanoma
DOCK8	9p24.3	13	6.47	7	24.14	20	0.00597	0.031	(B) BRAF Class 3 Melanoma
PPARG	3p25.2	17	2.64	8	9.20	25	0.005741	0.0306	(B) BRAF Class 3 Melanoma
ARHGAP35	19q13.32	14	5.83	8	21.05	22	0.004481	0.0247	(B) BRAF Class 3 Melanoma
CDK8	13q12.13	11	1.52	7	6.67	18	0.004225	0.0235	(B) BRAF Class 3 Melanoma
MST1R	3p21.31	13	2.77	7	11.67	20	0.003998	0.0225	(B) BRAF Class 3 Melanoma
ERBB3	12q13.2	21	2.59	10	8.20	31	0.004023	0.0225	(B) BRAF Class 3 Melanoma
IGF1R	15q26.3	42	5.15	15	12.30	57	0.003961	0.0224	(B) BRAF Class 3 Melanoma
STAG2	Xq25	24	3.11	11	9.40	35	0.003358	0.02	(B) BRAF Class 3 Melanoma
EZH2	7q36.1	33	3.19	13	8.67	46	0.003069	0.0186	(B) BRAF Class 3 Melanoma
LRP1B	2q22.1-q22.2	86	30.82	21	55.26	107	0.003066	0.0186	(B) BRAF Class 3 Melanoma
TCF3	19p13.3	14	2.12	8	8.60	22	0.002987	0.0184	(B) BRAF Class 3 Melanoma
PTEN	10q23.31	174	14.71	12	7.06	186	0.002968	0.0184	(A) BRAF Class 1 Melanoma
SNCAIP	5q23.2	36	13.09	12	34.29	48	0.002689	0.0169	(B) BRAF Class 3 Melanoma
NF2	22q12.2	16	1.97	9	7.44	25	0.002595	0.0165	(B) BRAF Class 3 Melanoma
PIK3C2G	12p12.3	47	9.94	15	23.81	62	0.002601	0.0165	(B) BRAF Class 3 Melanoma
FANCA	16q24.3	27	3.34	12	9.92	39	0.002456	0.0159	(B) BRAF Class 3 Melanoma
ALOX12B	17p13.1	13	2.48	8	10.67	21	0.002201	0.0145	(B) BRAF Class 3 Melanoma
NTRK2	9q21.33	18	2.23	10	8.26	28	0.001647	0.0113	(B) BRAF Class 3 Melanoma
TOP1	20q12	9	1.61	7	8.86	16	0.001576	0.011	(B) BRAF Class 3 Melanoma
TRAF7	16p13.3	12	1.86	8	8.70	20	0.001533	0.0108	(B) BRAF Class 3 Melanoma
RECQL4	8q24.3	35	5.13	14	14.29	49	0.001534	0.0108	(B) BRAF Class 3 Melanoma
CCNE1	19q12	8	0.99	7	5.79	15	0.001409	0.0102	(B) BRAF Class 3 Melanoma
MUTYH	1p34.1	14	1.81	9	7.69	23	0.001423	0.0102	(B) BRAF Class 3 Melanoma
MAGI2	7q21.11	18	7.89	8	32.00	26	0.001402	0.0102	(B) BRAF Class 3 Melanoma
FAT1	4q35.2	92	13.22	26	26.00	118	0.001224	0.008994	(B) BRAF Class 3 Melanoma
RUNX1	21q22.12	24	3.10	12	10.26	36	0.001202	0.008902	(B) BRAF Class 3 Melanoma
FLT4	5q35.3	61	8.01	21	18.10	82	0.001075	0.00803	(B) BRAF Class 3 Melanoma
PIK3CG	7q22.3	30	5.68	13	17.33	43	0.001037	0.007804	(B) BRAF Class 3 Melanoma
POLQ	3q13.33	13	6.05	9	25.71	22	0.001002	0.007609	(B) BRAF Class 3 Melanoma
SUFU	10q24.32	13	1.68	9	7.69	22	0.0009726	0.007446	(B) BRAF Class 3 Melanoma
SPTA1	1q23.1	53	20.08	16	47.06	69	0.0009523	0.007352	(B) BRAF Class 3 Melanoma
ERBB2	17q12	24	2.03	12	7.02	36	0.0009094	0.007081	(B) BRAF Class 3 Melanoma
ERG	21q22.2	28	3.88	13	12.38	41	0.0008753	0.006874	(B) BRAF Class 3 Melanoma
JAK2	9p24.1	24	2.16	12	7.55	36	0.0008343	0.006609	(B) BRAF Class 3 Melanoma
NTRK1	1q23.1	42	5.10	17	13.60	59	0.0008148	0.006512	(B) BRAF Class 3 Melanoma
BRCA1	17q21.31	34	4.21	15	12.30	49	0.0007988	0.00644	(B) BRAF Class 3 Melanoma
TP63	3q28	38	8.94	14	25.93	52	0.0006826	0.005588	(B) BRAF Class 3 Melanoma
KMT2B	19q13.12	40	10.96	15	30.00	55	0.0006869	0.005588	(B) BRAF Class 3 Melanoma
CBLB	3q13.11	8	2.76	8	16.00	16	0.0006504	0.005436	(B) BRAF Class 3 Melanoma
ARID1B	6q25.3	46	6.16	18	16.07	64	0.000641	0.005407	(B) BRAF Class 3 Melanoma
BRIP1	17q23.2	29	3.75	14	11.97	43	0.0005988	0.005098	(B) BRAF Class 3 Melanoma
PIK3CA	3q26.32	34	2.87	15	8.77	49	0.0005831	0.005011	(B) BRAF Class 3 Melanoma
PIK3C2B	1q32.1	24	4.99	12	17.65	36	0.0005623	0.004879	(B) BRAF Class 3 Melanoma
CIITA	16p13.13	18	6.52	11	25.00	29	0.0005282	0.004728	(B) BRAF Class 3 Melanoma
MPL	1p34.2	19	1.76	11	7.14	30	0.0005354	0.004728	(B) BRAF Class 3 Melanoma
FBXW7	4q31.3	30	2.66	14	8.64	44	0.0005373	0.004728	(B) BRAF Class 3 Melanoma
CUX1	7q22.1	34	7.62	15	22.39	49	0.0005398	0.004728	(B) BRAF Class 3 Melanoma
KDM5A	12p13.33	22	3.07	12	11.43	34	0.0004977	0.004534	(B) BRAF Class 3 Melanoma
TERT	5p15.33	460	60.85	87	76.99	547	0.0004878	0.004489	(B) BRAF Class 3 Melanoma
FANCD2	3p25.3	23	4.45	12	16.22	35	0.0004818	0.004479	(B) BRAF Class 3 Melanoma
TMPRSS2	21q22.3	15	2.09	10	9.52	25	0.000475	0.004461	(B) BRAF Class 3 Melanoma
MGA	15q15.1	68	11.11	22	25.58	90	0.0004609	0.004373	(B) BRAF Class 3 Melanoma
SLIT2	4p15.31	28	10.61	12	35.29	40	0.0004386	0.004206	(B) BRAF Class 3 Melanoma
POLE	12q24.33	60	7.91	21	19.27	81	0.0004253	0.004121	(B) BRAF Class 3 Melanoma
KDM5C	Xp11.22	24	3.14	13	11.21	37	0.0004204	0.004118	(B) BRAF Class 3 Melanoma
PDGFRA	4q12	50	4.32	19	11.52	69	0.0004088	0.004092	(B) BRAF Class 3 Melanoma
TP53BP1	15q15.3	18	4.41	11	18.03	29	0.0003955	0.004003	(B) BRAF Class 3 Melanoma
STAT4	2q32.2-q32.3	10	3.60	8	21.05	18	0.0003809	0.003917	(B) BRAF Class 3 Melanoma
GATA3	10p14	20	2.59	12	10.26	32	0.0003467	0.003679	(B) BRAF Class 3 Melanoma
MAP3K1	5q11.2	27	3.50	14	11.97	41	0.0003446	0.003679	(B) BRAF Class 3 Melanoma
HNF1A	12q24.31	18	1.63	11	7.10	29	0.0003298	0.003619	(B) BRAF Class 3 Melanoma
PTCH1	9q22.32	27	3.34	14	11.57	41	0.0003124	0.00347	(B) BRAF Class 3 Melanoma
CCND2	12p13.32	10	1.25	9	7.44	19	0.0002501	0.002813	(B) BRAF Class 3 Melanoma
FANCM	14q21.2	13	4.78	10	23.26	23	0.0002446	0.002791	(B) BRAF Class 3 Melanoma
TSC2	16p13.3	30	3.70	15	12.40	45	0.0002451	0.002791	(B) BRAF Class 3 Melanoma
MTOR	1p36.22	41	4.73	18	13.85	59	0.0002268	0.002649	(B) BRAF Class 3 Melanoma
PRKDC	8q11.21	54	10.53	21	26.58	75	0.0002246	0.002649	(B) BRAF Class 3 Melanoma
FANCE	6p21.31	7	1.35	8	10.13	15	0.0002013	0.002446	(B) BRAF Class 3 Melanoma
GNAS	20q13.32	13	1.15	10	6.17	23	0.0001979	0.002446	(B) BRAF Class 3 Melanoma
CDH4	20q13.33	15	7.46	10	34.48	25	0.0001989	0.002446	(B) BRAF Class 3 Melanoma
BRCA2	13q13.1	57	7.06	22	18.18	79	0.0001807	0.002287	(B) BRAF Class 3 Melanoma
PAK5	20p12.2	63	13.64	21	33.87	84	0.0001636	0.002099	(B) BRAF Class 3 Melanoma
PTK2B	8p21.2	9	4.19	9	25.71	18	0.0001491	0.001941	(B) BRAF Class 3 Melanoma
DAXX	6p21.32	16	2.26	11	11.11	27	0.0001339	0.001802	(B) BRAF Class 3 Melanoma
PBRM1	3p21.1	24	3.14	14	12.07	38	0.0001365	0.001802	(B) BRAF Class 3 Melanoma
NOTCH4	6p21.32	33	6.73	15	22.73	48	0.0001365	0.001802	(B) BRAF Class 3 Melanoma
ATRX	Xq21.1	47	5.82	20	16.53	67	0.0001266	0.001748	(B) BRAF Class 3 Melanoma
BRD4	19p13.12	39	5.13	18	15.93	57	0.000113	0.001584	(B) BRAF Class 3 Melanoma
CIC	19q13.2	40	5.54	18	17.14	58	0.0001075	0.001531	(B) BRAF Class 3 Melanoma
RPTOR	17q25.3	34	4.72	17	16.19	51	6.259e-05	0.0009504	(B) BRAF Class 3 Melanoma
NOTCH3	19p13.12	87	11.65	29	26.85	116	5.859e-05	0.0009046	(B) BRAF Class 3 Melanoma
PDGFRB	5q32	32	3.96	17	14.05	49	5.207e-05	0.0008178	(B) BRAF Class 3 Melanoma
DICER1	14q32.13	25	3.30	15	13.27	40	4.96e-05	0.0007988	(B) BRAF Class 3 Melanoma
JAK3	19p13.11	37	3.32	18	11.32	55	4.998e-05	0.0007988	(B) BRAF Class 3 Melanoma
APC	5q22.2	74	6.86	27	17.42	101	4.231e-05	0.0007008	(B) BRAF Class 3 Melanoma
EP300	22q13.2	42	5.43	20	17.09	62	4.008e-05	0.0006762	(B) BRAF Class 3 Melanoma
COL7A1	3p21.31	46	22.89	18	62.07	64	3.672e-05	0.0006434	(B) BRAF Class 3 Melanoma
EPHA7	6q16.1	58	10.41	23	28.40	81	3.533e-05	0.000631	(B) BRAF Class 3 Melanoma
PTPN11	12q24.13	12	1.07	11	6.79	23	3.165e-05	0.0005767	(B) BRAF Class 3 Melanoma
TET1	10q21.3	31	5.02	16	19.05	47	3.144e-05	0.0005767	(B) BRAF Class 3 Melanoma
PTPRT	20q12-q13.11	90	19.19	28	43.75	118	2.925e-05	0.0005551	(B) BRAF Class 3 Melanoma
SETBP1	18q12.3	40	8.70	19	27.94	59	2.794e-05	0.0005416	(B) BRAF Class 3 Melanoma
SYK	9q22.2	17	2.88	13	14.77	30	2.368e-05	0.000469	(B) BRAF Class 3 Melanoma
EPHA3	3p11.1	45	7.63	21	23.86	66	1.896e-05	0.0003839	(B) BRAF Class 3 Melanoma
ASXL1	20q11.21	31	3.97	18	15.25	49	1.323e-05	0.0002793	(B) BRAF Class 3 Melanoma
EGFR	7p11.2	51	4.31	23	13.45	74	1.349e-05	0.0002793	(B) BRAF Class 3 Melanoma
CSF3R	1p34.3	13	1.85	12	11.65	25	1.265e-05	0.0002743	(B) BRAF Class 3 Melanoma
TP53	17p13.1	175	14.79	49	28.82	224	1.172e-05	0.0002605	(B) BRAF Class 3 Melanoma
ALK	2p23.2-p23.1	71	6.00	28	16.37	99	1.095e-05	0.0002494	(B) BRAF Class 3 Melanoma
GLI1	12q13.3	31	4.23	18	16.51	49	1.038e-05	0.0002425	(B) BRAF Class 3 Melanoma
DDR2	1q23.3	19	2.16	15	11.19	34	6.405e-06	0.0001535	(B) BRAF Class 3 Melanoma
ABCB11	2q31.1	11	4.93	11	34.38	22	6.084e-06	0.0001498	(B) BRAF Class 3 Melanoma
RET	10q11.21	44	3.72	22	12.87	66	5.855e-06	0.0001482	(B) BRAF Class 3 Melanoma
ARID1A	1p36.11	63	7.80	27	22.31	90	5.67e-06	0.0001476	(B) BRAF Class 3 Melanoma
PREX2	8q13.2	75	17.69	27	45.76	102	4.483e-06	0.0001201	(B) BRAF Class 3 Melanoma
CBL	11q23.3	30	3.68	19	15.57	49	2.509e-06	6.969e-05	(B) BRAF Class 3 Melanoma
GRIN2A	16p13.2	92	17.46	32	42.67	124	2.524e-06	6.969e-05	(B) BRAF Class 3 Melanoma
NOTCH1	9q34.3	49	4.20	24	14.46	73	2.065e-06	6.068e-05	(B) BRAF Class 3 Melanoma
IL7R	5p13.2	49	6.89	24	23.08	73	1.913e-06	5.81e-05	(B) BRAF Class 3 Melanoma
FGFR2	10q26.13	47	3.97	24	14.04	71	1.561e-06	4.903e-05	(B) BRAF Class 3 Melanoma
SMARCA4	19p13.2	50	6.19	25	20.66	75	1.519e-06	4.903e-05	(B) BRAF Class 3 Melanoma
MECOM	3q26.2	39	14.66	21	50.00	60	1.191e-06	4.018e-05	(B) BRAF Class 3 Melanoma
IKZF1	7p12.2	62	8.07	29	24.79	91	7.02e-07	2.461e-05	(B) BRAF Class 3 Melanoma
BLM	15q26.1	23	3.02	18	15.52	41	6.37e-07	2.322e-05	(B) BRAF Class 3 Melanoma
CARD11	7p22.2	61	7.89	29	24.79	90	4.72e-07	1.793e-05	(B) BRAF Class 3 Melanoma
MET	7q31.2	70	5.96	31	18.24	101	4.56e-07	1.793e-05	(B) BRAF Class 3 Melanoma
ROS1	6q22.1	150	17.38	49	37.69	199	3.66e-07	1.516e-05	(B) BRAF Class 3 Melanoma
RUNX1T1	8q21.3	35	7.58	21	31.34	56	3.29e-07	1.425e-05	(B) BRAF Class 3 Melanoma
NTRK3	15q25.3	52	6.44	27	22.31	79	2.87e-07	1.307e-05	(B) BRAF Class 3 Melanoma
AXL	19q13.2	30	3.71	21	17.36	51	2.01e-07	9.628e-06	(B) BRAF Class 3 Melanoma
KIT	4q12	24	2.03	19	11.11	43	1.72e-07	8.697e-06	(B) BRAF Class 3 Melanoma
HRAS	11p15.5	4	0.34	11	6.43	15	8.47e-08	4.539e-06	(B) BRAF Class 3 Melanoma
TET2	4q24	70	8.96	33	27.97	103	6.66e-08	3.791e-06	(B) BRAF Class 3 Melanoma
ERBB4	2q34	109	9.69	42	25.77	151	6.04e-08	3.671e-06	(B) BRAF Class 3 Melanoma
PTPRD	9p24.1-p23	88	15.71	36	43.37	124	4.36e-08	2.836e-06	(B) BRAF Class 3 Melanoma
FGFR4	5q35.2	26	3.19	21	17.07	47	3.92e-08	2.746e-06	(B) BRAF Class 3 Melanoma
KDR	4q12	87	7.84	38	24.05	125	1.26e-08	9.56e-07	(B) BRAF Class 3 Melanoma
ATM	11q22.3	70	6.31	34	21.52	104	1.1e-08	9.08e-07	(B) BRAF Class 3 Melanoma
FLT1	13q12.3	71	9.18	35	29.91	106	9.19e-09	8.81e-07	(B) BRAF Class 3 Melanoma
KMT2D	12q13.12	119	15.39	46	39.32	165	9.67e-09	8.81e-07	(B) BRAF Class 3 Melanoma
ARID2	12q12	66	8.66	34	29.31	100	7.44e-09	8.47e-07	(B) BRAF Class 3 Melanoma
NOTCH2	1p12	44	5.54	28	24.35	72	2.55e-09	3.73e-07	(B) BRAF Class 3 Melanoma
SETD2	3p21.31	60	7.43	33	27.27	93	2.86e-09	3.73e-07	(B) BRAF Class 3 Melanoma
KMT2A	11q23.3	69	8.83	36	30.51	105	1.5e-09	2.74e-07	(B) BRAF Class 3 Melanoma
FLT3	13q12.2	41	3.68	31	19.62	72	1.52e-11	3.46e-09	(B) BRAF Class 3 Melanoma
KRAS	12p12.1	5	0.42	17	9.94	22	3.81e-12	1.16e-09	(B) BRAF Class 3 Melanoma
NRAS	1p13.2	10	0.85	54	31.58	64	4.27e-42	1.94e-39	(B) BRAF Class 3 Melanoma
NF1	17q11.2	52	6.41	79	64.75	131	8.93e-48	8.13e-45	(B) BRAF Class 3 Melanoma

[truncated: 8 more sheets: S11 CRC Class 1+2, S12 CRC Class 1+2 Filtered, S13 CRC Class1+3, S14 CRC Class1+3 Filtered, S15 NSCLC Class1+2, S16 NSCLC Class1+2 Filtered, S17 NSCLC Class1+3, S18 NSCLC Class1+3 Filtered]
