# Supplementary material for: The Clinical, Genomic, and Transcriptomic Landscape of BRAF Mutant Cancers
Source: Cancers (Basel). 2024 Jan 19;16(2):445. doi: 10.3390/cancers16020445 (PMC10814895; doi:10.3390/cancers16020445)
Supplement: Supplementary file 1 [file cancers-16-00445-s001.zip › Table S19- RNA expression Heatmap Genes CRC.xlsx]

## Sheet: heatmapBase
Table S19: RNA expression Heatmap Genes CRC
Order Top to Bottom	GeneName	baseMean	Log2Fold (V600 vs. non-V600)	Padj
1	PLAC8	1243.02	2.35665	0.000210276
2	REG4	24343.3	3.03355	0.000472826
3	HSD17B2	637.24	2.52389	0.000628696
4	EDN3	143.713	2.59032	0.000870361
5	ACHE	365.76	3.54899	2.3486428894541e-06
6	MUC6	1707.03	4.49637	0.00673532
7	TFF1	4841.89	3.35693	0.00114708
8	TFF2	512.384	4.16535	0.000995831
9	ARHGEF4	135.338	3.48916	3.23893835122715e-06
10	B3GNT7	850.548	2.40147	0.00211092
11	NXF3	119.693	6.92884	9.54622561416729e-08
12	ALDH1L1	466.563	3.06883	0.00842534
13	FAM83A	56.3986	3.09678	0.00481891
14	ALPI	66.095	3.17867	0.00270609
15	CIDEC	57.5564	2.2271	0.00973388
16	REG1A	24504	4.40815	0.00627829
17	DMBT1	9795.17	3.51091	0.00973388
18	PDE10A	217.614	2.40206	0.00243454
19	AQP3	1462.79	2.39175	0.00574502
20	GFI1	171.507	2.04522	0.000401899
21	SPRR1B	55.0251	5.18856	0.00535666
22	SERPINB2	69.0662	5.68357	1.32556133265397e-06
23	CXCL5	1516.79	4.15467	0.000655156
24	CCL3L1	78.7553	2.6949	0.00080629
25	OSM	195.275	2.82447	0.000823545
26	G0S2	252.035	2.01396	0.00105339
27	MMP1	3323.88	2.5251	0.00434029
28	GJB5	203.609	4.52343	1.5201517841113e-07
29	GJB4	174.341	2.23386	0.00461767
30	SPON1	1808.59	2.17312	0.0090234
31	PI3	2613.37	3.08395	0.00841474
32	KRT7	696.784	3.84973	0.00018541
33	ANGPTL4	254.698	2.15794	0.000221967
34	IL1RN	750.699	2.06076	0.000573929
35	PTPRR	321.578	2.43826	2.00713817296529e-05
36	NLRP2	139.043	5.29054	3.23893835122715e-06
37	SLC4A11	274.841	2.04591	0.00670715
38	ANO1	1939.25	2.41414	5.39296869895848e-05
39	AHNAK2	1681.11	2.35257	0.0058372
40	SCEL	68.1103	4.5606	0.000705058
41	KLK10	2481.04	2.84049	0.00223982
42	RHOF	1461.32	3.12508	5.61566374524968e-10
43	CD177	299.573	3.72897	0.00207297
44	IGFL2	71.5699	3.31027	0.00131356
45	CRABP2	164.573	2.65873	0.00557509
46	HSPA6	404.886	2.95425	0.000472826
47	NTSR1	257.126	4.21027	0.00100896
48	MSLN	1936.72	2.65923	0.00978441
49	AGAP2	215.326	2.2296	0.00113552
50	LCK	877.449	2.14577	0.00674125
51	PNMA2	291.088	2.81569	0.000605296
52	DNAH2	287.875	2.36457	0.000740865
53	SERPINB5	3362.77	2.24057	0.00624963
54	XKR9	123.661	2.47078	0.000497559
55	RARRES1	1612.3	2.06985	0.00793553
56	GABRP	276.932	2.75931	0.00181561
57	PCDHGB2	55.3182	2.40387	0.00255226
58	NXPH4	470.896	3.92486	0.000823545
59	FBXL16	367.516	2.2382	1.87594276239213e-05
60	KREMEN2	69.4174	2.56023	0.00113552
61	RPL9	1666.24	2.317	0.000160543
62	CAMK2N2	59.0645	3.0589	2.52554243674947e-05
63	CTXN1	136.06	2.02678	0.000301396
64	PRDM8	174.998	2.4167	3.72578871500103e-05
65	TNFSF9	503.36	2.61032	0.000246127
66	ULBP2	140.871	2.43439	0.000601389
67	TNNT1	296.681	4.13728	8.10362250444849e-07
68	BATF3	53.956	2.50978	0.00061613
69	KYNU	171.422	2.14572	0.00660303
70	CP	180.622	4.55846	2.77165525262821e-05
71	APOE	3318.45	2.2493	0.00466564
72	CCL18	841.591	2.70489	0.00418262
73	MT2A	2264.7	2.2555	1.31241709449664e-06
74	SECTM1	1270.38	2.18598	0.000226823
75	CCL3	277.17	2.4514	0.000138359
76	CCL4	241.002	2.38385	3.06679644967993e-06
77	CSF3R	251.666	2.20519	0.00466564
78	CD274	68.3946	2.25319	0.00488319
79	HAPLN3	689.622	2.3252	9.37482150240772e-05
80	TYMP	2373.4	2.36693	0.000278962
81	SLC11A1	260.795	2.20939	8.15260625448729e-05
82	TREM1	87.2036	2.60395	3.56420773222151e-05
83	MARCO	154.242	2.9703	0.00538327
84	HOPX	288.639	2.13574	0.00115777
85	GAS1	188.445	2.39411	0.00418262
86	COL10A1	591.852	2.48303	0.00434029
87	ALOX5	697.216	2.16169	1.64495998991239e-05
88	CRIP1	3216.65	2.35052	4.74328449518725e-05
89	MUC16	89.2377	7.57529	5.20205340008233e-05
90	MMP25	132.37	2.16065	0.00545536
91	LAG3	210.232	2.52155	0.000716886
92	PRF1	344.072	2.19861	0.000262613
93	NKG7	213.91	2.39779	0.000588099
94	CCL5	947.263	2.28454	0.000795865
95	CD7	247.047	2.07202	0.000504502
96	PDCD1	70.4613	2.04065	0.00244375
97	ZNF683	60.2244	3.04438	0.000448434
98	GZMH	85.3931	2.54265	0.00180294
99	IDO1	1428.63	3.53239	0.00330698
100	CTSW	111.444	2.33544	0.00164152
101	GZMA	254.456	2.30822	0.000537623
102	GNLY	281.234	3.50899	3.62205914397797e-07
103	HLA-DRB1	6537.5	2.54636	0.000235543
104	HLA-DRB5	2449	3.26771	6.50138457224812e-05
105	HLA-DQB1	2787.9	2.71844	0.000765523
106	CIITA	681.454	2.16907	0.00602273
107	KLRD1	68.8719	2.15932	0.00488594
108	CXCL13	328.723	2.84738	0.000531015
109	GZMK	74.6967	2.49908	0.00665074
110	HLA-DQA1	2141.51	2.36425	0.00912809
111	NCF1	133.035	2.27402	0.000783913
112	RPS28	279.467	3.82019	2.4461250328944e-05
113	ATP1A3	138.799	2.95751	0.00343791
114	STMN3	915.525	2.3239	0.000641501
115	ROBO3	101.762	2.00249	4.47251270935232e-05
116	TM4SF4	441.253	4.18271	0.00217616
117	CHST4	100.776	4.16994	0.00388492
118	TRPV6	99.5545	5.08621	1.11315556459097e-06
119	PIWIL1	475.112	3.32568	0.000387292
120	SAA2	183.917	3.46766	0.0090234
121	VNN2	151.178	4.44476	3.18084814799007e-13
122	VNN1	1093.3	4.76174	1.24364966304651e-08
123	GABRB3	69.7525	4.61858	0.00239586
124	MIA	172.542	4.72314	0.000255679
125	AQP5	627.516	6.91484	1.34042903014939e-06
126	CALB1	142.022	4.53212	0.00850352
127	PIPOX	56.838	-2.97054	0.00330698
128	PRSS1	72.3772	4.65684	0.00468058
129	NPC1L1	85.1253	3.40141	0.0090234
130	PPBP	59.5015	-4.09233	0.000280288
131	DKK4	62.7837	-4.2878	0.000178355
132	SULT1B1	111.288	-2.53063	0.00739789
133	PLCB4	1017.47	-2.24851	0.00160882
134	MME	252.266	-2.60389	0.000234762
135	SLC19A3	136.43	-4.49101	2.88704992725806e-07
136	EPHB1	84.0282	-2.75614	0.0035277
137	CLIC6	97.5808	-2.21036	0.00320402
138	TNFRSF19	71.4578	-2.82567	0.00114708
139	NOTUM	358.604	-4.34	7.16955815378217e-05
140	SLC4A8	60.856	-2.10212	0.00351475
141	MFAP3L	75.1209	-2.29346	0.000233049
142	VANGL2	132.318	-2.35849	0.000531015
143	SEMA5A	482.549	-2.01272	0.000571123
144	ABAT	256.27	-2.01069	0.000763336
145	SHROOM2	146.923	-2.55399	0.00160089
146	VAV3	513.052	-2.65927	0.00257911
147	GRM8	91.7182	-4.69603	1.89322005203318e-08
148	ENPP3	154.567	-5.38558	1.03306299093691e-07
149	C10orf99	538.6	-4.03618	0.00183039
150	PTPRO	442.501	-4.5309	1.54447527917033e-12
151	CTTNBP2	93.464	-3.51465	1.71291560821305e-05
152	PTPRD	193.518	-2.97865	0.0019438
153	SELENBP1	2819.6	-2.47183	0.000401899
154	CFTR	1825.43	-2.25767	0.00456957
155	ZNF470	52.0964	-2.0066	0.00881512
156	GSPT2	119.293	-2.21417	0.00511639
157	ZNF606	52.167	-2.25236	0.000295664
158	ABCB1	325.138	-3.08825	0.000401899
159	ALPK3	243.554	-3.31111	2.81606499949782e-09
160	APCDD1	897.018	-4.2958	5.7622875119349e-17
161	FHOD3	84.9341	-2.76722	4.57928937158291e-06
162	MYEF2	91.5861	-3.50674	0.000507274
163	CAB39L	214.083	-2.90032	3.73942227697651e-09
164	NKD1	350.445	-4.15916	1.9042529526278e-11
165	TMEM150C	87.8619	-3.95699	4.21098214751993e-10
166	SNCAIP	75.9327	-3.84002	2.51154500746066e-10
167	APOLD1	635.328	-3.46482	5.62599098753709e-14
168	KIT	111.399	-2.26625	0.00145321
169	LINC00667	399.829	-2.38842	0.000295664
170	RNF43	2468	-2.37417	2.21877396740701e-08
171	HUNK	303.891	-3.03119	0.000160543
172	AXIN2	1515.01	-3.2819	5.17392629682108e-10
173	ZNRF3	715.804	-2.05953	4.43986412652835e-12
174	ACSL6	69.9054	-3.53377	0.00909602
175	ASCL2	644.99	-2.19557	0.00351475
176	CEL	446.25	-6.7022	5.62599098753709e-14
177	QPRT	449.09	-2.89589	0.00105339
178	MEX3A	184.825	-2.19861	1.87594276239213e-05
179	LRP4	1237.96	-2.86681	0.000711729
180	TDGF1	191.939	-2.75246	0.00345809
181	VWA2	359.393	-2.06889	0.00308914
182	CKB	3269.24	-2.01015	0.00330698
