# Supplementary material for: The Clinical, Genomic, and Transcriptomic Landscape of BRAF Mutant Cancers
Source: Cancers (Basel). 2024 Jan 19;16(2):445. doi: 10.3390/cancers16020445 (PMC10814895; doi:10.3390/cancers16020445)
Supplement: Supplementary file 1 [file cancers-16-00445-s001.zip › Table S20- RNA expression Heatmap Genes NSCLC.xlsx]

## Sheet: heatmapGenesOrder2
Table S20: RNA expression Heatmap Genes NSCLC
Order Top to Bottom	GeneName	baseMean	Log2Fold (V600 vs. non-V600)	Padj
1	COL17A1	795.382	3.23158	4.82103239075705e-05
2	TNNT2	70.669	2.7497	0.00736608
3	LRRK2	3217	3.55088	6.34764667051338e-07
4	SFTPA2	122419	3.42918	0.00247574
5	SFTPA1	66286.4	3.69236	0.000947493
6	NRGN	842.054	2.66063	0.000587268
7	MFSD2A	1028.89	2.23584	1.57589837172947e-07
8	SDR16C5	1448.8	2.42787	2.06427056035884e-05
9	ANKRD22	742.667	2.15414	0.00488791
10	IGFBP6	704.11	3.35786	8.59281448776341e-05
11	CDKL2	579.782	2.22226	0.000981746
12	SCN1A	57.5532	3.04036	1.98531167416728e-05
13	HLF	753.266	3.28217	1.4221943862008e-05
14	MS4A2	109.715	2.03229	0.00927995
15	PTPN13	2678.36	3.12282	2.50629524821832e-05
16	TMEM27	223.916	2.65803	0.00396081
17	BAMBI	519.51	2.44192	0.00151839
18	ANKRD24	60.0761	3.13568	1.08949673422842e-08
19	DOC2A	94.9839	3.54315	0.000649237
20	ITGA10	80.1716	2.17001	0.00113722
21	PLCXD3	97.4885	3.78215	1.6282037196063e-06
22	SERPIND1	453.086	4.557	2.20229728437837e-05
23	SHISA3	1520.59	5.98513	9.16760241301558e-10
24	HHIP	696.249	5.54986	5.03007574563369e-09
25	HP	3370.76	3.42116	0.00499682
26	CYS1	134.316	2.3509	0.0039692
27	HSD17B6	383.612	2.32365	0.00151839
28	MEG3	141.344	3.08258	0.000120748
29	CYP21A2	50.0372	2.58331	0.000171447
30	MAPT	81.3203	2.38136	6.66359558065532e-06
31	NOVA1	97.8167	2.7974	0.000981746
32	FGFBP1	210.429	2.56202	0.0077599
33	DUOX2	209.123	3.04113	5.19871265920101e-05
34	ANXA10	74.413	5.09276	0.000422051
35	MMP1	2743.97	2.93367	0.00877178
36	VSIG1	1911.46	4.00659	0.000444411
37	TPRG1	73.7163	2.8073	3.73218895002822e-05
38	DEPDC7	115.485	2.98952	0.000135809
39	FABP4	91.3532	2.67358	0.00496065
40	SLC26A9	709.528	2.02257	0.00425724
41	MICALCL	86.2171	2.01597	0.00342456
42	TM4SF4	158.986	4.12431	0.000207418
43	HABP2	901.17	3.15267	0.00283847
44	ERBB4	97.2143	3.97811	4.29367626991382e-06
45	PRG4	168.245	3.01708	0.000618528
46	PTGFR	158.588	3.83027	2.50629524821832e-05
47	CD96	347.262	2.2949	0.00080468
48	ARNT2	1133.3	3.17399	6.84525258002947e-05
49	GRIK3	54.3248	4.3412	0.000104531
50	TP63	338.133	3.27431	0.000568906
51	MACROD2	997.506	3.11377	0.00486872
52	HSD17B2	173.562	4.13642	0.000176119
53	RASGRF1	361.543	2.61776	0.00410027
54	IFI44L	998.438	2.52778	0.000432791
55	MX1	3202.83	2.00561	9.63226306802674e-05
56	IFIT1	1033.52	2.12241	0.000712058
57	HPGD	6109.76	3.61979	1.00726405932689e-05
58	ITGB3	360.335	2.47116	0.00205506
59	ARHGAP20	207.45	2.06768	0.000484089
60	CCBP2	175.6	-3.11745	0.00205506
61	GLDC	69.3382	-3.19066	0.00103716
62	DMRTA2	59.7244	-5.11827	0.00331638
63	KIF1A	208.385	-5.30872	0.000568906
64	H19	1697	-2.86525	0.00269027
65	HIF3A	491.534	-2.75048	0.00868928
66	LYPD3	310.066	-2.33322	0.003561
67	CLDN6	288.401	-7.84773	3.09858480337748e-08
68	BRDT	223.407	-6.05597	4.25076752033233e-05
69	MAGEA3	79.9501	-9.00015	5.34635738718595e-05
70	MAGEA6	85.7208	-9.04388	1.19444626601638e-05
71	FAM133A	54.5482	-5.53508	6.66359558065532e-06
72	PRAME	305.652	-4.97247	0.000198842
73	ALG1L	110.076	-2.24995	0.00477379
74	IGF2BP3	619.318	-5.44622	6.56270268773513e-14
75	QPRT	765.997	-3.51327	8.09954987090885e-10
76	VTCN1	129.986	-2.52999	0.0042497
77	HIST3H2A	63.7382	-2.96137	0.00126365
78	PEG10	1868.99	-2.91797	0.00310056
79	SMC1B	58.3864	-4.47931	0.000197948
80	NEFH	138.294	-3.93721	0.000159396
81	STAG3	83.6009	-2.3957	0.00839336
82	LY6K	427.617	-3.18047	0.00730697
83	MGC87042	62.6131	-2.3848	0.000641494
84	SRPK3	145.051	-2.95112	0.000127505
85	GNG4	93.4246	-3.23909	0.00202274
86	SYNGR3	64.1734	-2.23739	0.00135252
87	C13orf29	119.841	-2.48904	1.743779538431e-05
88	UCHL1	1320.4	-4.91708	5.03007574563369e-09
89	RND2	168.944	-2.92408	0.000537837
90	IGFBPL1	62.6435	-2.50914	0.00587815
91	SRCRB4D	61.2625	-2.0157	0.00850333
92	NRIP3	184.086	-2.2733	0.00239383
93	TM4SF19	53.7545	-3.42055	0.000109901
94	CNTD2	105.055	-2.59867	0.0053894
95	JSRP1	111.263	-2.87683	0.000788202
96	HORMAD1	123.837	-7.0369	7.49091826731459e-08
97	BHMT2	374.666	-3.64148	0.00283847
98	CHODL	55.5033	-2.82048	0.00448139
99	C7orf68	726.38	-2.37248	0.00103947
100	NOTUM	116.149	-3.57061	0.000120748
101	NR0B1	107.502	-8.88182	0.00396081
102	CABYR	277.978	-5.46285	1.52659780347975e-11
103	AKR1C2	10823	-7.35526	1.08949673422842e-08
104	AKR1C1	17033.1	-5.49883	5.35530101475807e-05
105	SRXN1	2862.42	-2.27232	0.00353443
106	ABCC2	92.6081	-3.57942	0.00472124
107	TSKU	1500.09	-2.00059	1.5475588129455e-06
108	EFCAB4B	95.9051	-2.78882	0.000692032
109	SYT13	137.507	-3.76592	0.00744518
110	SLC16A14	602.027	-2.5577	0.00328741
111	CPS1	1313.86	-6.60263	2.50595242887759e-06
112	DYNC1I1	52.2631	-2.41775	0.00252151
113	APOD	1186.9	-2.33047	0.00545751
114	STK31	78.9703	-3.19	1.20644884699298e-06
115	LGSN	460.433	-7.1025	5.46115518205788e-19
116	FLNC	378.521	-2.21861	0.00396081
117	FSCN1	3144.79	-2.11595	0.00342456
118	SERPINE1	2148.62	-2.32741	0.000950254
119	TMEFF1	70.197	-2.17931	0.00065547
120	POPDC3	52.0657	-5.91127	3.55285124258954e-06
121	PFN2	2146.94	-2.57108	5.57228032059708e-06
122	LGI2	316.922	-2.4031	0.00201991
123	HOXB6	169.911	-2.74481	0.000239023
124	HOXB9	100.426	-5.07229	0.00189698
125	ASCL1	131.707	-6.59377	2.15636070691066e-05
126	MSI1	96.0003	-4.04437	0.000378573
127	NPTX1	486.389	-4.59107	3.3083272073259e-06
128	CTNND2	101.149	-5.52127	2.06427056035884e-05
129	LOC145837	149.639	-4.58435	5.16791165884873e-05
130	TAS1R3	114.869	-3.45913	2.40185905098512e-05
131	SV2A	210.032	-2.56882	0.00154711
132	MLLT11	222.54	-2.63748	0.000341528
133	GRIK5	121.757	-3.32819	0.007925
134	SP8	57.4056	-7.50116	0.000197948
135	PAX9	366.456	-2.49205	0.00565992
136	HOXC6	56.0918	-2.54374	0.00466625
137	FKBP10	3367.02	-2.02245	0.00100446
138	CARD14	205.444	-2.46181	0.00103445
139	YBX2	108.755	-2.94102	0.00486872
140	NEB	67.2233	-2.9735	0.000239023
141	IGF2BP1	151.053	-7.3289	1.39140167601398e-07
142	GRIN2D	140.026	-3.40999	3.73044238457827e-06
143	PDIA2	98.7425	-4.65918	0.000307759
144	RNF183	55.1738	-3.19864	0.00143967
145	KCNMB4	217.407	-2.35518	0.00100446
146	FST	55.6017	-2.81198	0.0015855
147	PI15	132.018	-2.5956	0.00248754
148	RGS4	100.963	-2.02841	0.0069365
149	KCND2	68.9329	-2.27617	0.00518995
150	SLC2A5	180.297	-2.14802	0.00665139
151	BMP6	216.207	-2.39925	0.00408932
152	BASP1	1991.68	-3.04617	2.56204931751679e-05
153	MSMB	267.639	-3.58283	0.00496065
154	FXYD4	77.7678	-4.75233	0.00913031
155	S100P	4287.02	-4.02917	0.000113036
156	FGL1	461.441	-4.37488	0.00486872
157	KCNE4	321.814	-2.50543	0.00136408
158	SLC14A2	60.4817	-5.86622	7.09394358943598e-05
159	PGC	13310.9	-5.36808	0.00188734
160	PKP1	1087.09	-4.30633	5.06550919175569e-05
