# Supplementary material for: The Clinical, Genomic, and Transcriptomic Landscape of BRAF Mutant Cancers
Source: Cancers (Basel). 2024 Jan 19;16(2):445. doi: 10.3390/cancers16020445 (PMC10814895; doi:10.3390/cancers16020445)
Supplement: Supplementary file 1 [file cancers-16-00445-s001.zip › Table S21- RNA expression Heatmap Genes Melanoma.xlsx]

## Sheet: heatmapGenesOrder2
Table S21: RNA expression Heatmap Genes Melanoma
Order Top to Bottom	GeneName	baseMean	Log2Fold (V600 vs. non-V600)	Padj
1	PDE11A	65.1541	2.0717	0.00026954
2	DLK1	51.0001	7.02249	7.37256354129412e-07
3	TSIX	106.845	2.69828	0.00756967
4	C16orf89	77.0437	2.48082	2.61200012284779e-05
5	HHATL	1088.22	7.04992	1.21142807885545e-13
6	HKDC1	323.956	2.5997	2.1665074803489e-05
7	FRAS1	379.09	2.16061	5.28386709446676e-05
8	LGI4	1677.85	2.60935	6.78329088750257e-07
9	FXYD1	192.376	2.92174	7.53460954046122e-07
10	ATP1B2	863.873	2.71212	1.06413684028269e-06
11	TF	2880.09	3.41643	7.53460954046122e-07
12	SLC26A4	230.284	2.79019	7.76845348832326e-10
13	LOC286002	66.6928	4.38243	5.71369581293985e-13
14	BHLHE22	97.973	2.73227	4.16023101297223e-07
15	OLFM3	58.7716	5.80549	3.17852495634269e-07
16	CLEC1A	145	2.46316	1.26305598700506e-06
17	RAPGEF4	248.592	2.28129	1.06413684028269e-06
18	C1QTNF3	2264.13	3.96423	1.80057658274539e-10
19	CNTN6	64.1617	4.23741	1.06413684028269e-06
20	F2RL2	336.902	2.14698	0.00158603
21	FABP7	964.412	2.04828	0.00995119
22	F5	573.263	3.34586	1.04129244818819e-07
23	RNF175	180.961	2.91054	1.30199267418877e-06
24	GJB2	918.052	2.07713	0.00131079
25	GJB6	120.057	3.60344	5.39571883571003e-05
26	LRRTM1	54.2374	4.74921	2.32111432832561e-07
27	TFCP2L1	130.804	3.1908	5.31915521964819e-09
28	NELL1	992.011	5.64654	3.59464927183409e-11
29	AGXT2L1	79.0109	2.53266	0.000891669
30	HPGD	1523.99	2.56031	6.30827704815201e-05
31	KIF17	229.358	2.37035	5.40890402300718e-05
32	RLBP1	462.196	2.08839	0.000739139
33	BMX	121.319	3.56286	5.75397738577331e-08
34	BAAT	554.096	4.78239	6.75185707397101e-10
35	RPH3A	62.3326	-3.85509	3.52493601623588e-10
36	TMPRSS13	101.545	2.99425	1.54552081804545e-06
37	CD24	144.881	-2.2504	1.43317803376736e-05
38	C6orf114	76.0567	-2.22492	0.000227457
39	APCDD1	684.578	2.00562	0.000176988
40	RORC	75.5671	2.33232	0.000164535
41	MMP3	59.1968	2.86238	0.000175798
42	MMP1	593.361	2.63817	0.000118257
43	FAM19A5	398.114	2.1271	0.000354649
44	APOC2	1795.52	2.37374	0.0004612
45	MT1L	101.521	2.11507	0.00065122
46	SEC14L4	57.5293	4.39251	2.80597863965486e-07
47	GALNT5	166.814	2.36032	7.52069477373896e-05
48	ACPP	117.146	2.59247	5.72948216067726e-05
49	SERPINA3	12985	2.17866	0.00227004
50	HAPLN1	516.827	5.55672	3.59464927183409e-11
51	CAMK2B	50.959	2.32572	4.34131653728549e-05
52	TESC	365.432	3.2704	1.8264879887309e-09
53	KLK6	100.815	4.36894	1.64667623920411e-08
54	PODNL1	238.585	3.10736	1.22064833650718e-09
55	PLA2G5	82.531	2.93852	4.69708998368043e-08
56	MCHR1	324.909	2.17611	0.00442403
57	CHGB	71.5622	2.26046	0.00065122
58	NTSR1	94.2713	3.51315	1.7156622542752e-06
59	NGEF	68.399	3.01662	7.97030005149696e-05
60	NPTX2	1527.17	2.28105	0.00866664
61	TGFA	255.475	2.40782	5.61387755647413e-05
62	VAT1L	257.726	3.70058	1.06413684028269e-06
63	SYTL5	303.61	2.57721	0.00139464
64	PCSK1	479.533	2.76202	7.78055574486302e-05
65	CT45A1	57.421	6.57625	0.000838479
66	RYR2	139.188	2.29982	0.000354649
67	SOD3	941.796	2.25604	2.04915042233921e-05
68	FMOD	2540.68	2.54015	1.463922963927e-06
69	PRSS35	104.189	2.78732	0.000122852
70	SEMA3E	191.886	3.37848	1.54552081804545e-06
71	ABCA6	396.788	2.47548	2.04915042233921e-05
72	BAALC	2073.27	2.28547	0.000210917
73	OLIG2	122.395	2.82748	0.000262658
74	REM1	80.5116	2.02264	0.000284546
75	ITIH5	5656.78	4.5632	3.59464927183409e-11
76	IGFBP3	15146.5	2.66972	2.80597863965486e-07
77	TSPAN11	484.922	2.41127	7.6556542085655e-06
78	RELN	155.764	2.41558	0.00138101
79	TFAP2B	118.868	4.10038	0.000210917
80	COCH	69.3832	2.13835	0.000739139
81	THBS2	9237.74	2.13822	7.81869150088939e-05
82	PLN	71.308	2.96027	5.88916294948427e-08
83	KCNH2	62.0211	2.57487	5.35168361909456e-05
84	DLX1	251.994	2.57305	1.30199267418877e-06
85	HOXB9	341.146	2.82723	8.60998570812278e-06
86	MDFI	345.951	2.94552	2.65834926115732e-09
87	MSI1	59.1208	2.02495	0.00202115
88	GRIK3	763.595	2.39695	0.00340502
89	PRIMA1	202.338	2.66918	0.00019916
90	RGS11	54.793	2.42826	2.66553452241288e-05
91	PLIN4	82.5589	3.29324	8.20481938839855e-08
92	PLA2G2A	221.558	3.10895	2.1751589852102e-06
93	PRG4	72.6311	2.39906	0.000279054
